# Supplementary material for: Causal relationships between neuropsychiatric disorders and nonalcoholic fatty liver disease: A bidirectional Mendelian randomization study
Source: Research Square preprint supplement (doi:10.21203/rs.3.rs-3885368/v1), 2024-01-25

Supplementary Figure S1. Forest plot (A), Leave-one-out plot (B), scatter plot (C) and funnel plot (D) of the causal effect of anxiety on NAFLD.

A

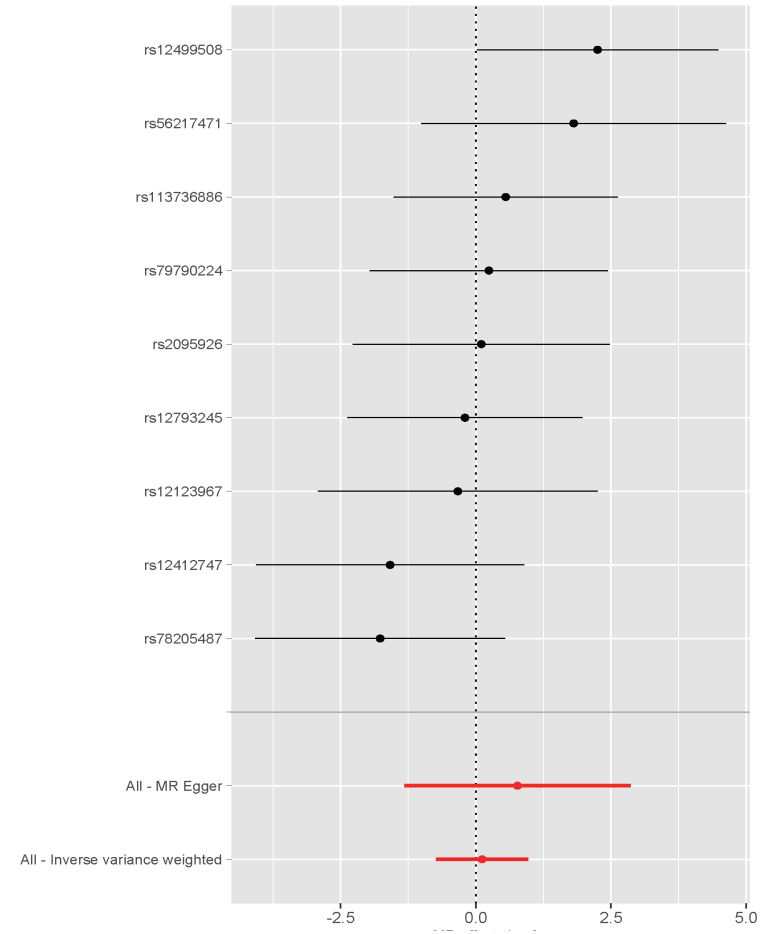

B

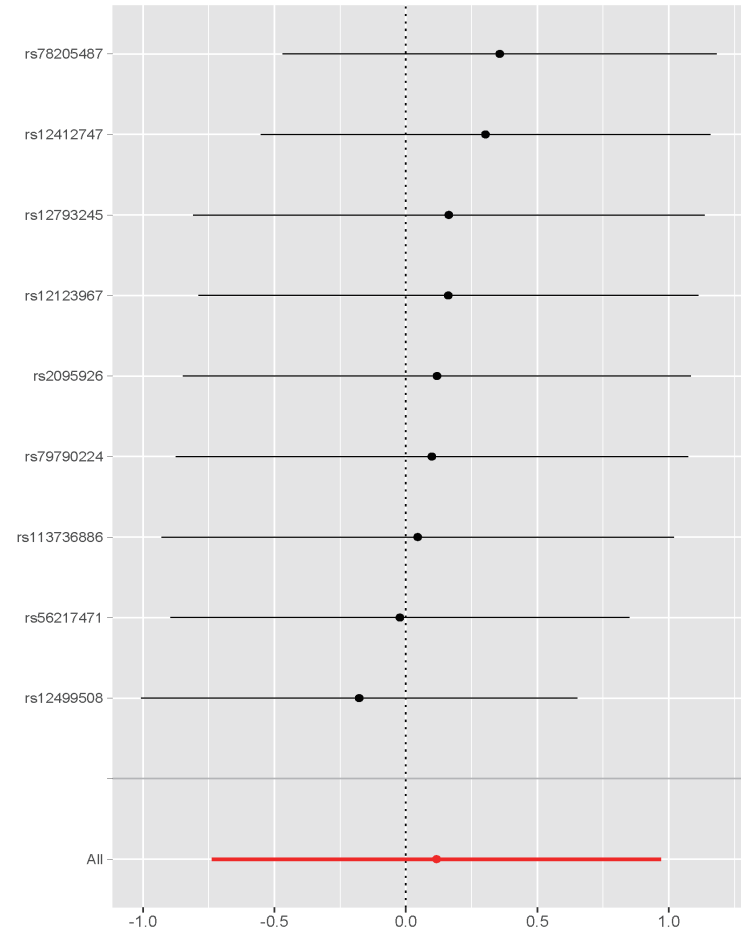

C

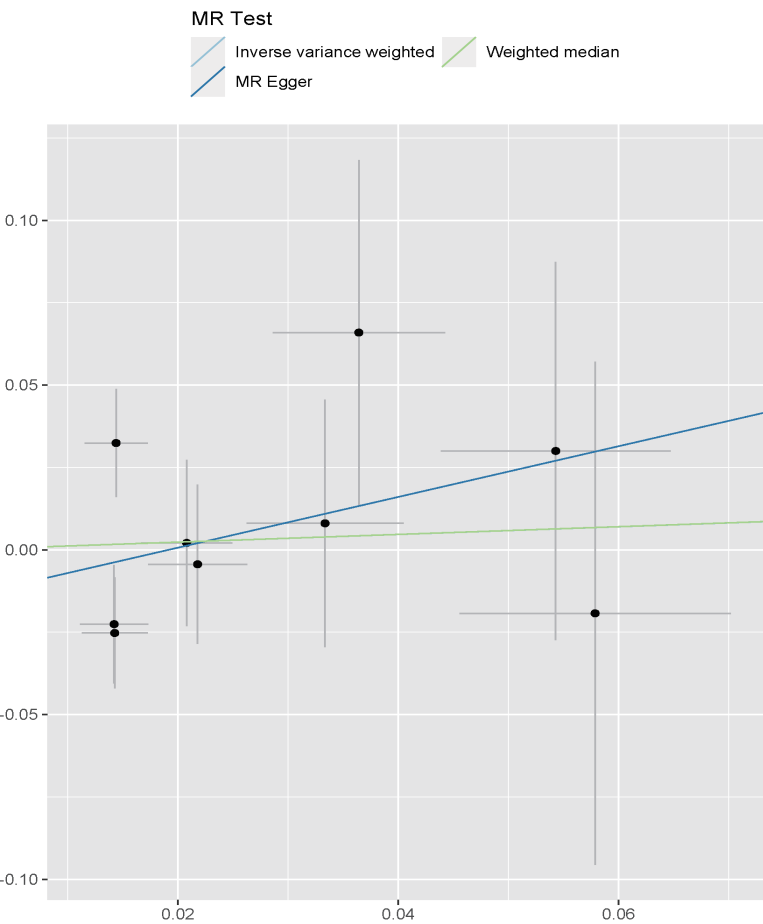

D

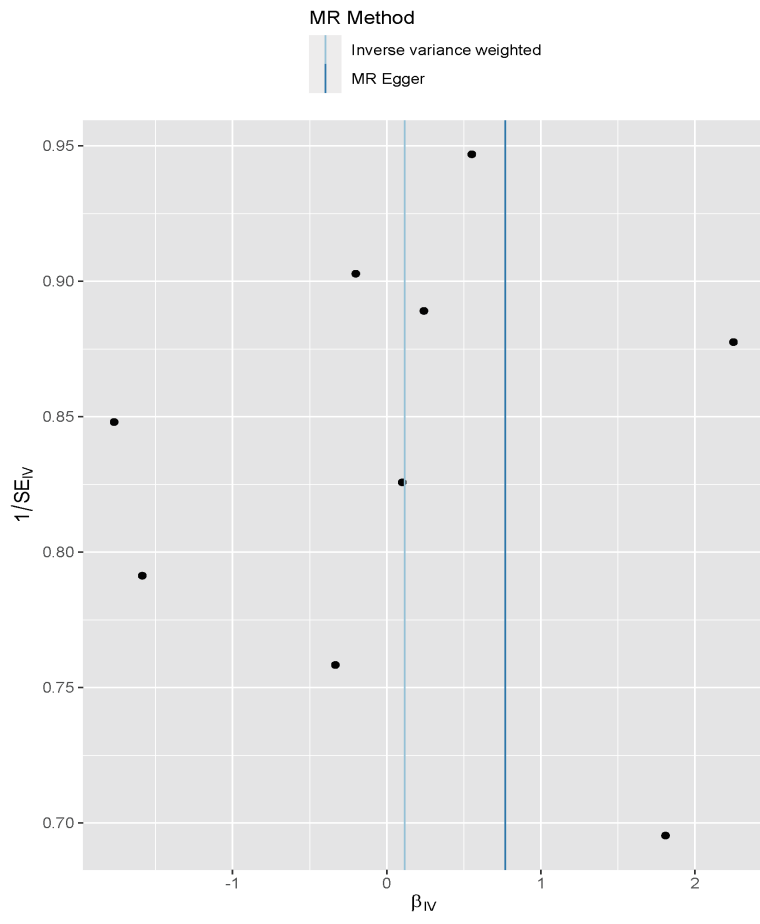

Supplementary Figure S2. Forest plot (A), Leave-one-out plot (B), scatter plot (C) and funnel plot (D) of the causal effect of schizophrenia on NAFLD.

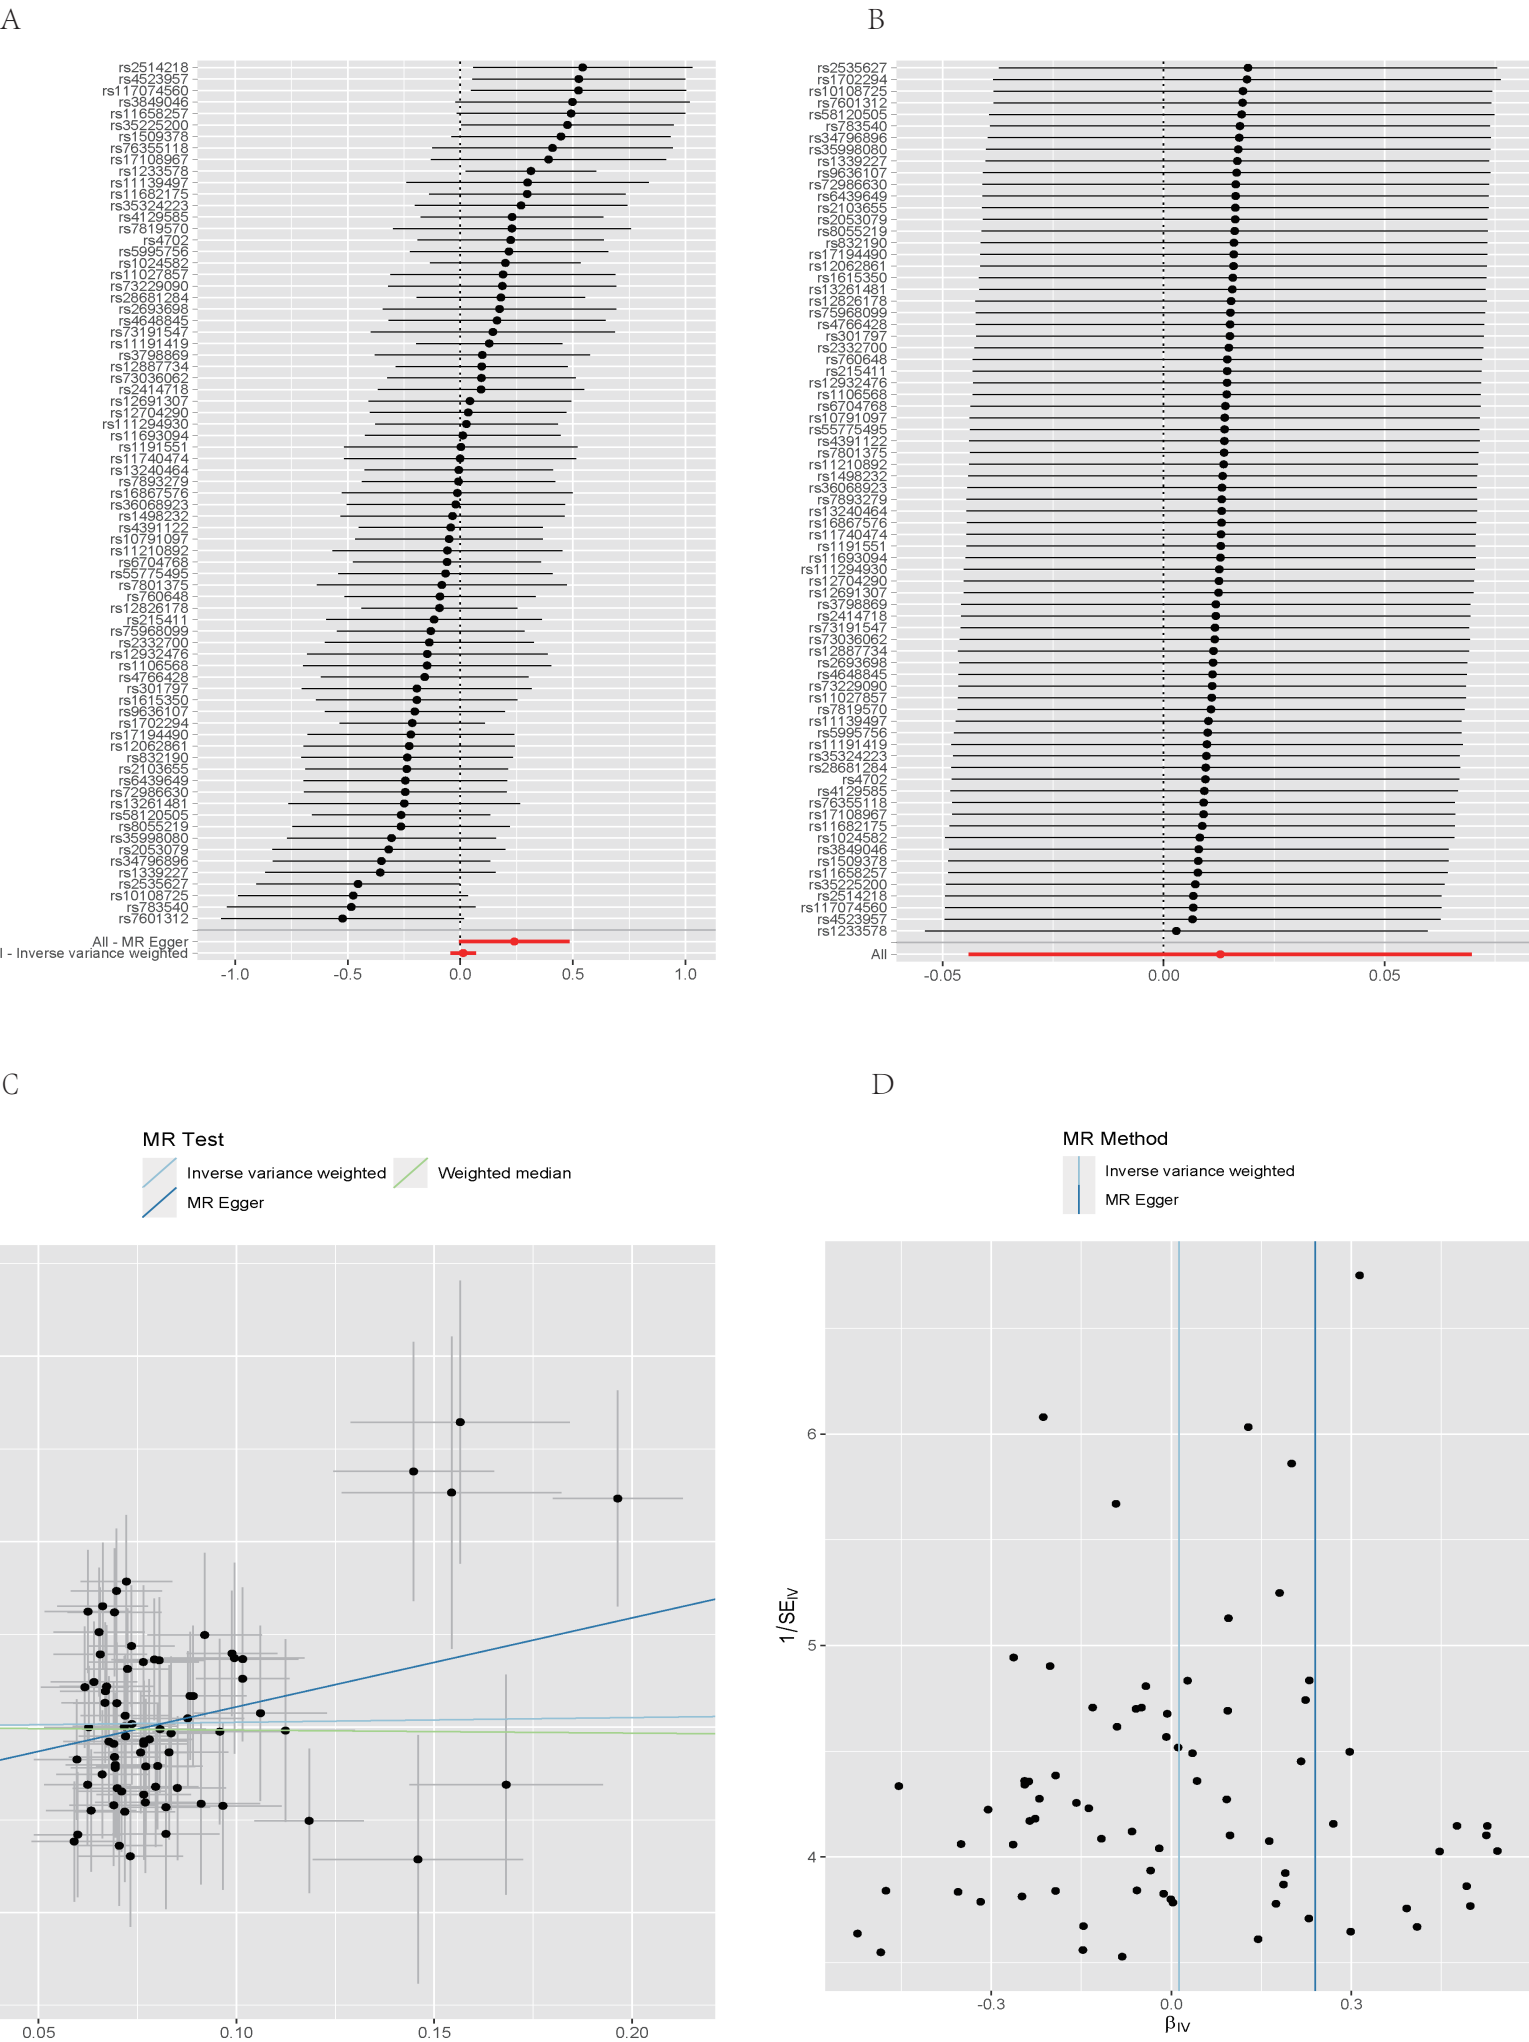

Supplementary Figure S3. Forest plot (A), Leave-one-out plot (B), scatter plot (C) and funnel plot (D) of the causal effect of Post-traumatic stress disorder on NAFLD.

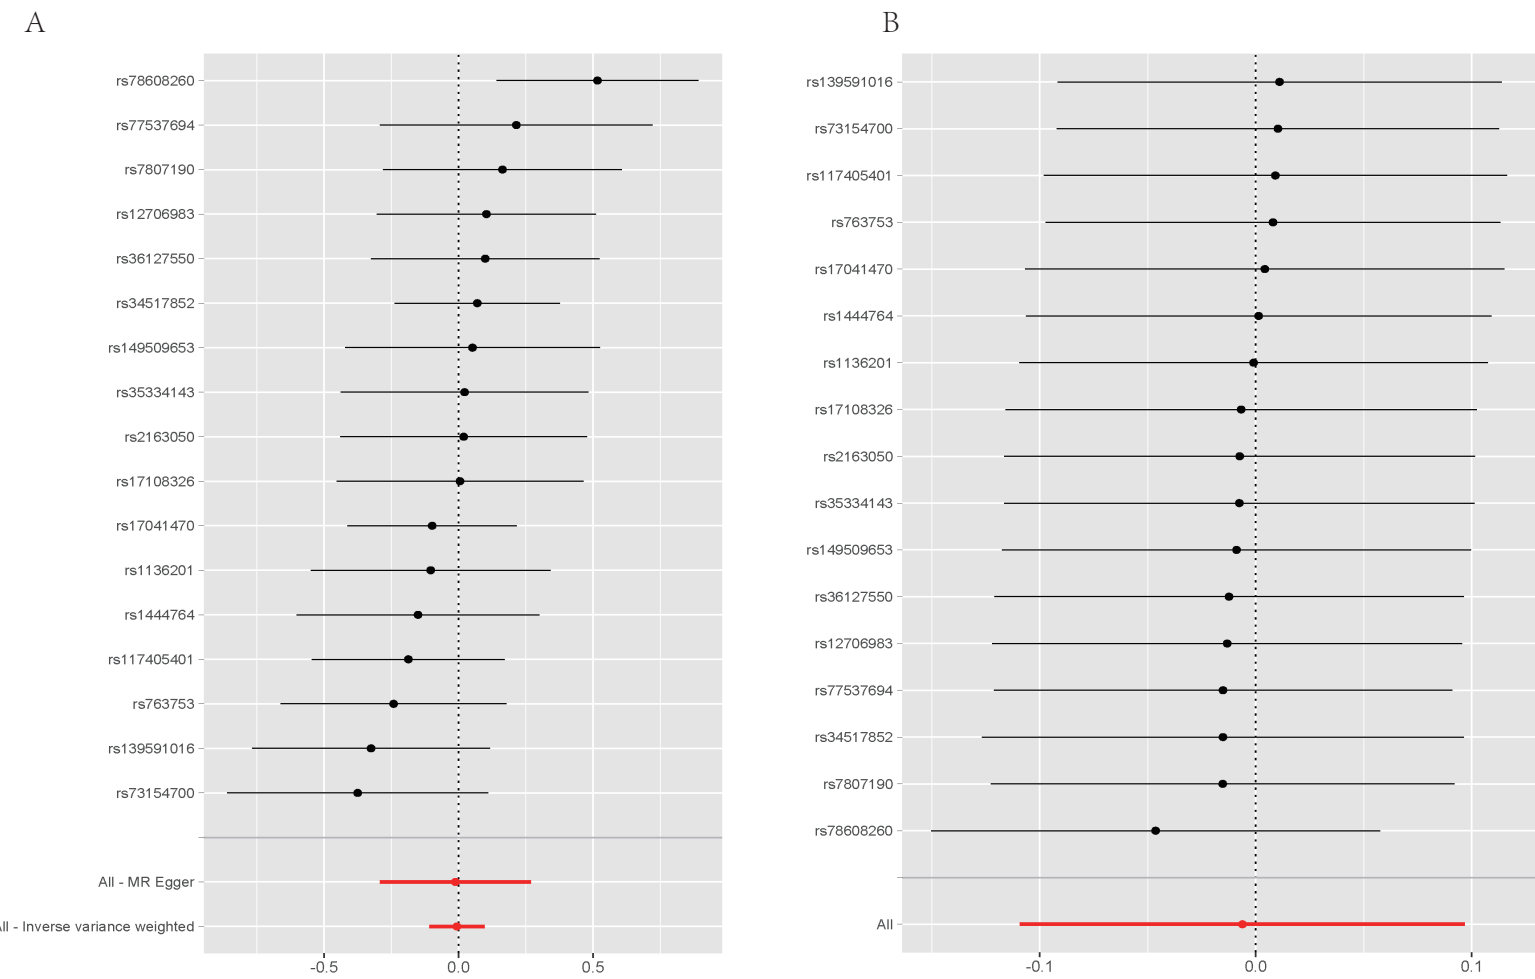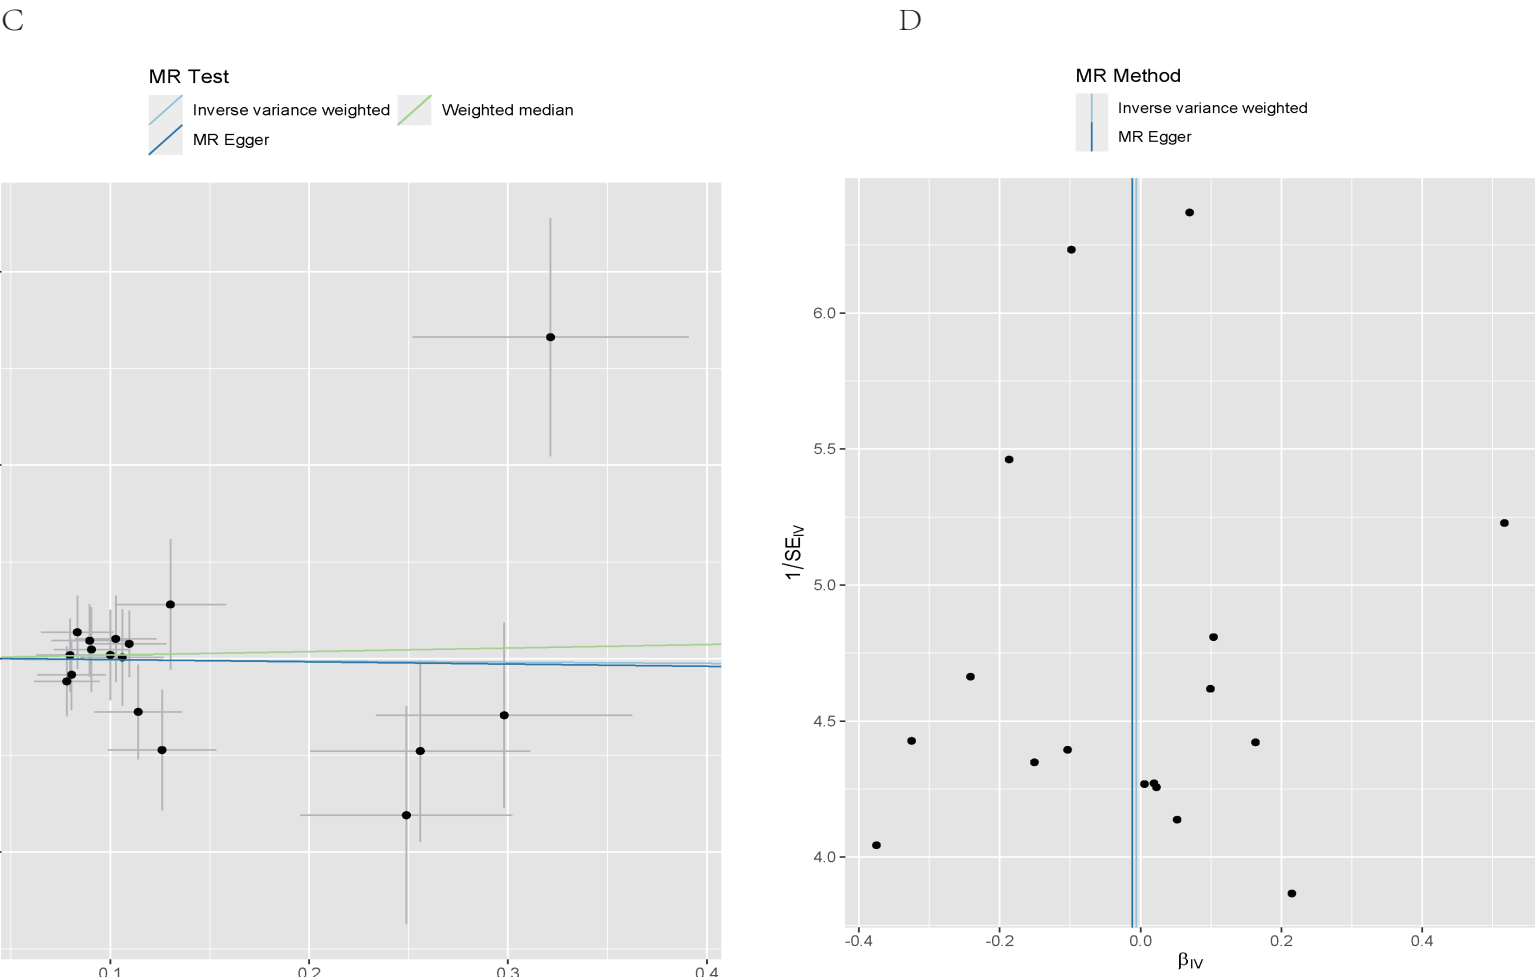

Supplementary Figure S4. Forest plot (A), Leave-one-out plot (B), scatter plot (C) and funnel plot (D) of the causal effect of Obsessive-compulsive disorder on NAFLD.

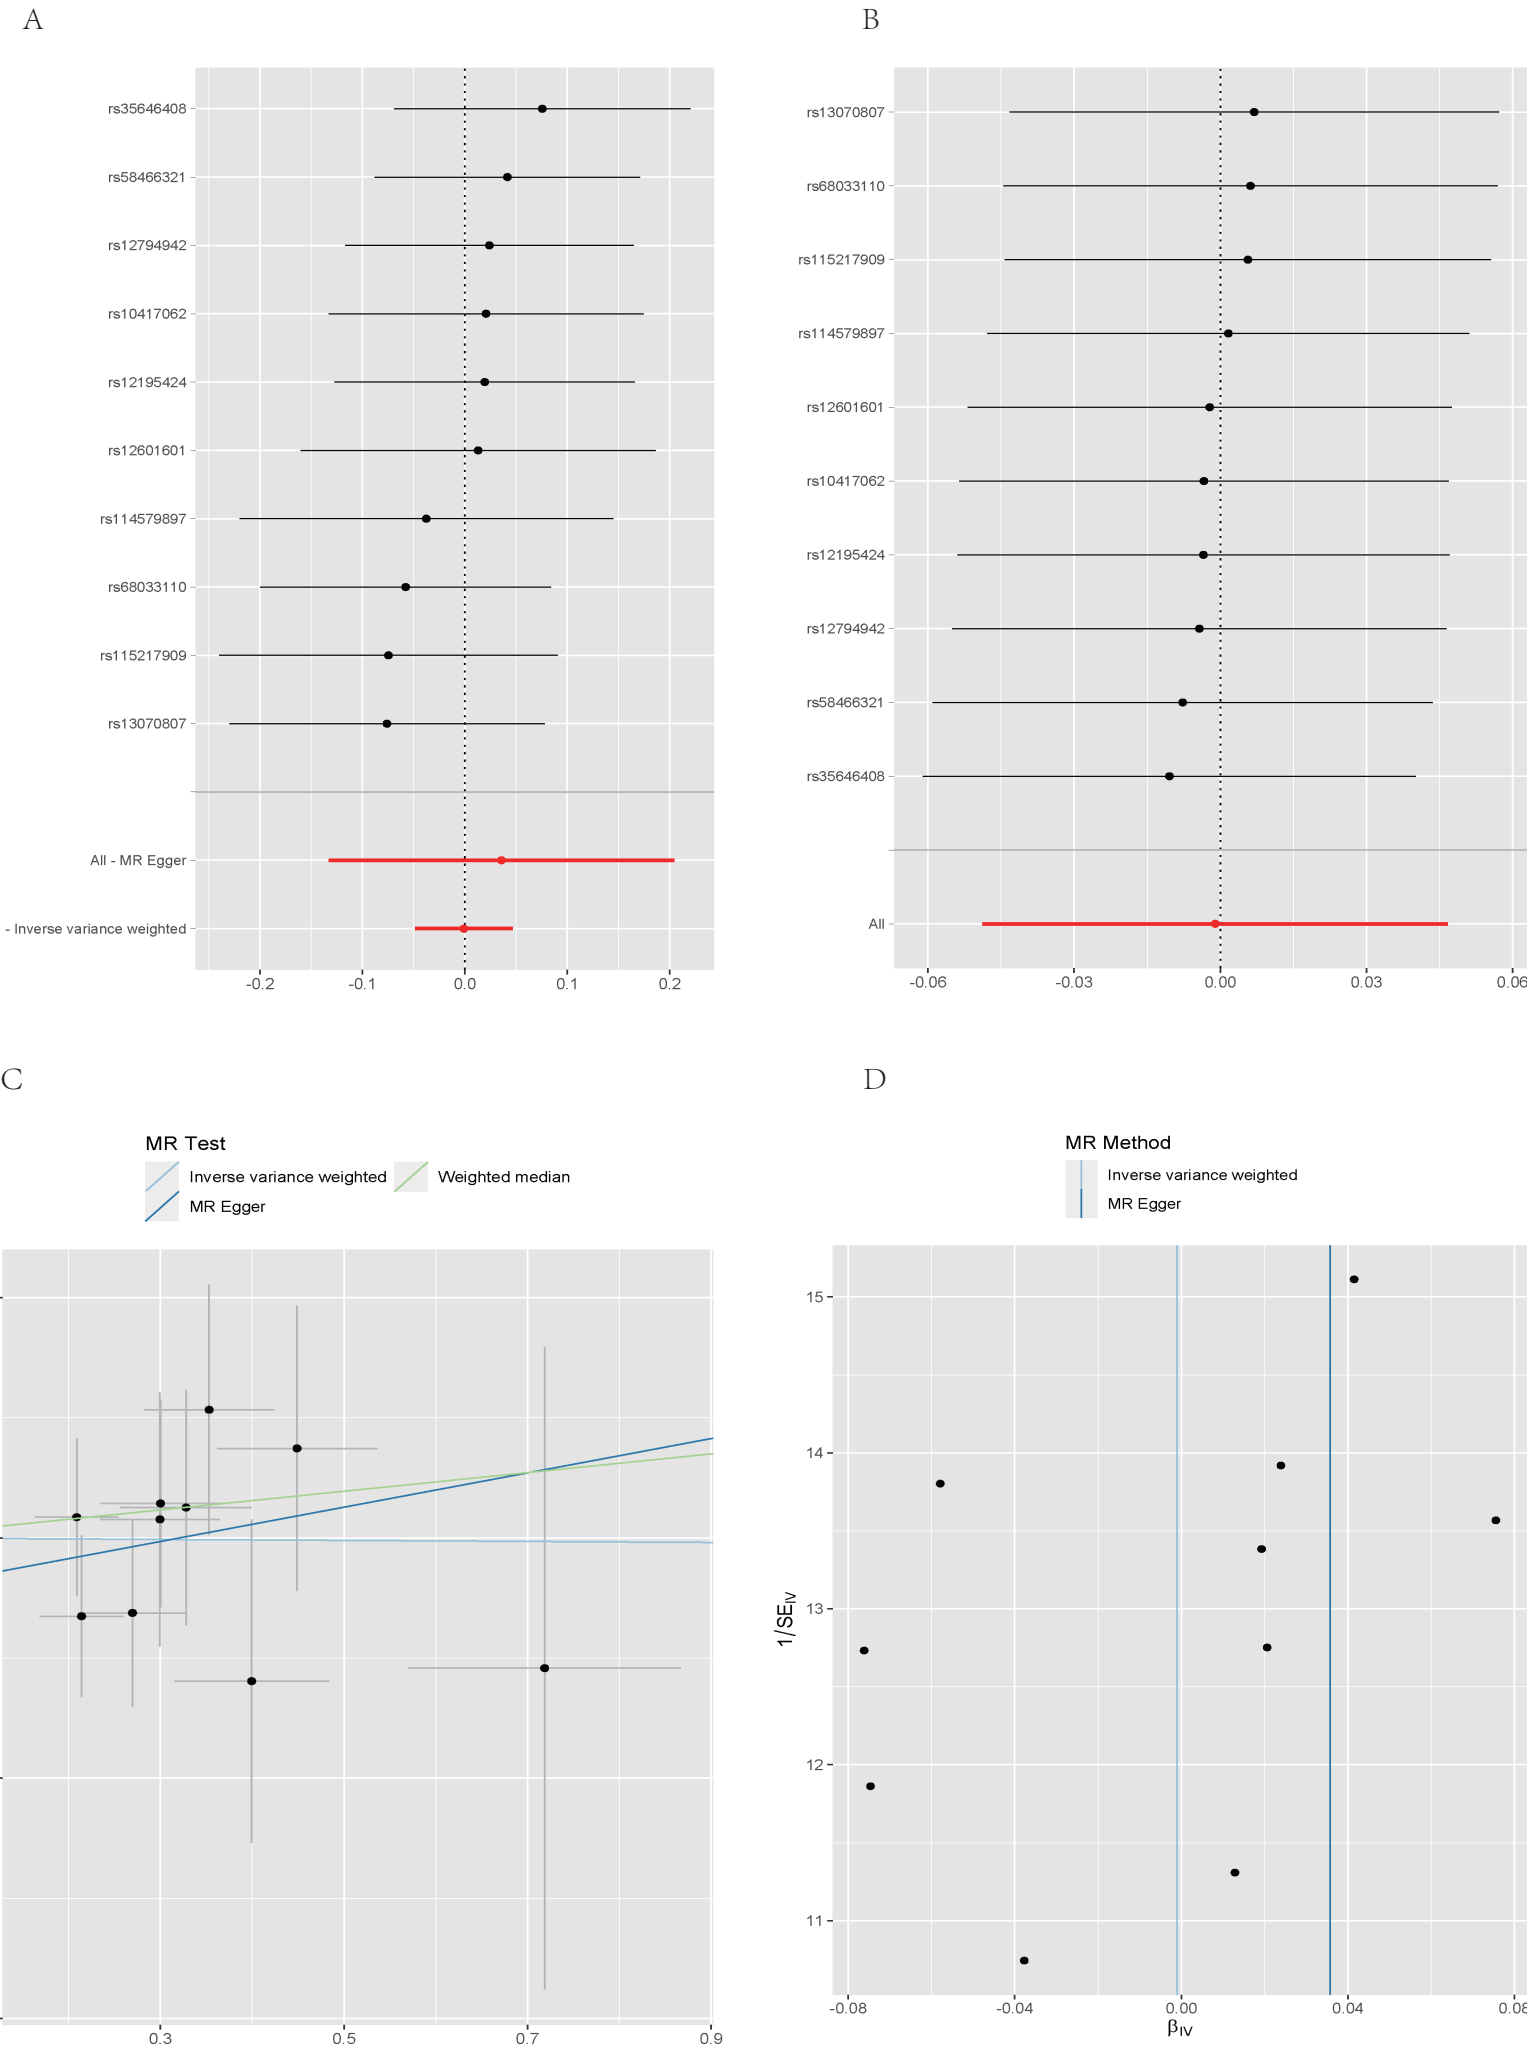



Supplementary Figure S5. Forest plot (A), Leave-one-out plot (B), scatter plot (C) and funnel plot (D) of the causal effect of Major Depressive Disorder on NAFLD.

A

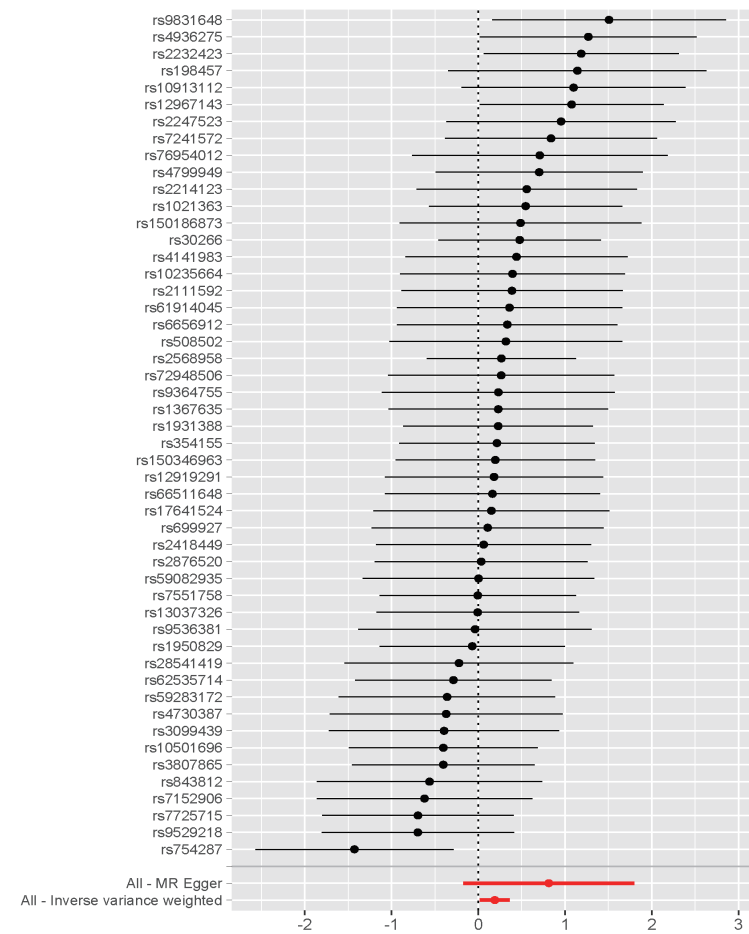

B

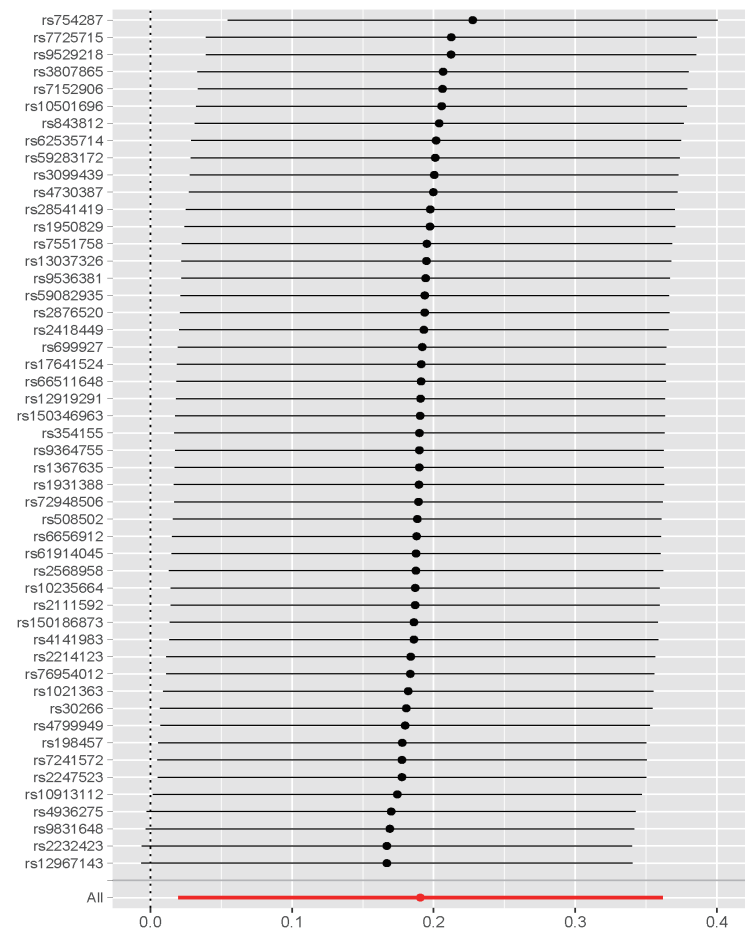

C

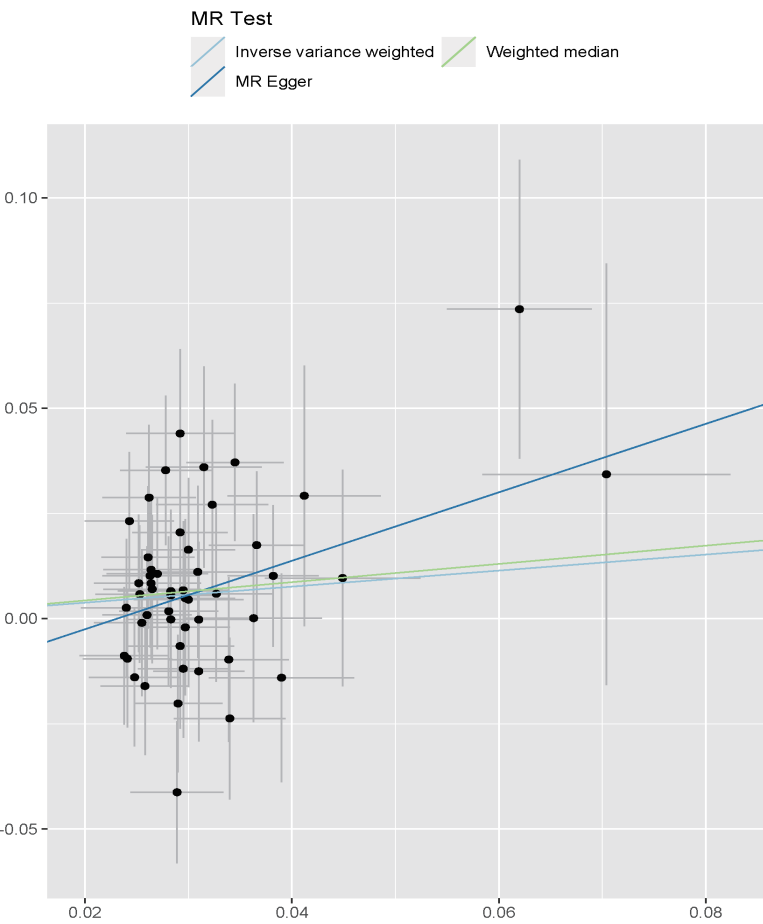

D

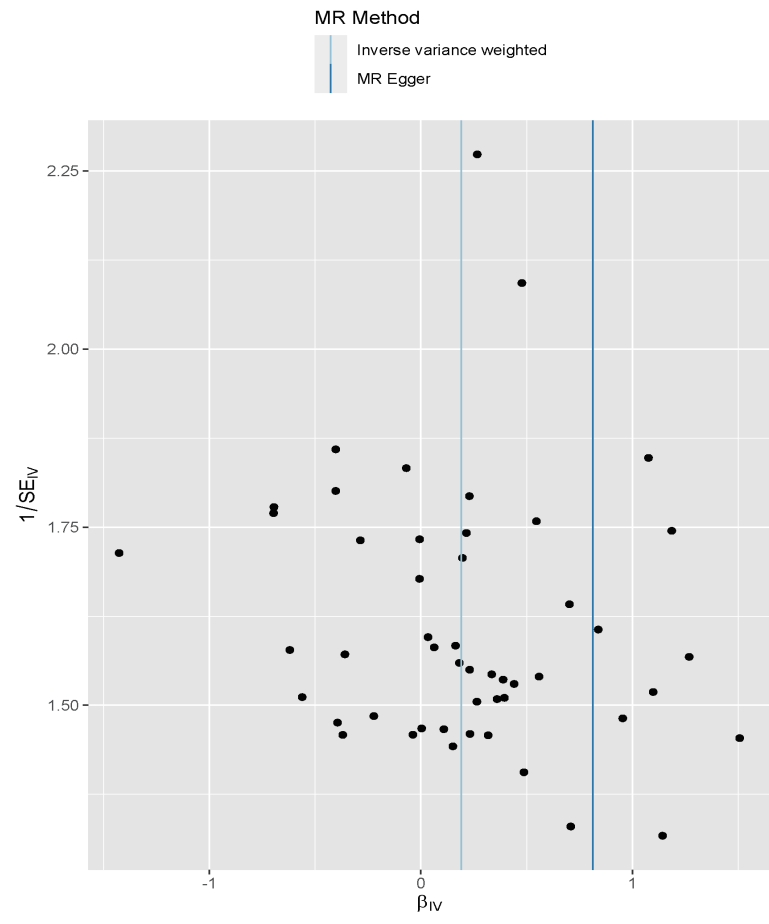

Supplementary Figure S6. Forest plot (A), Leave-one-out plot (B), scatter plot (C) and funnel plot (D) of the causal effect of Bipolar disorder on NAFLD.

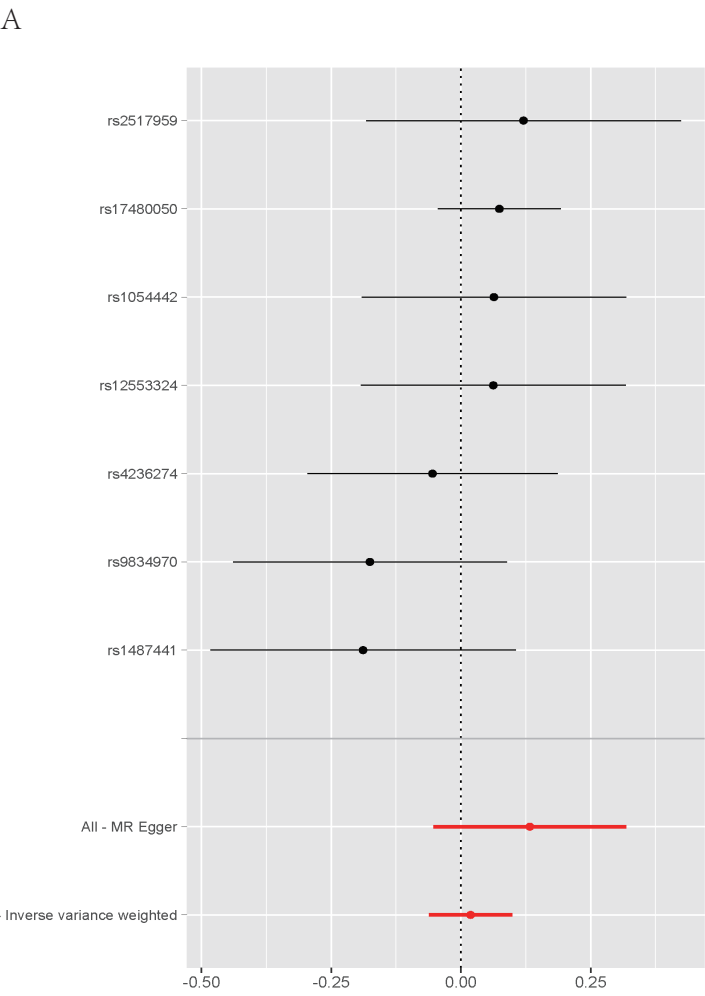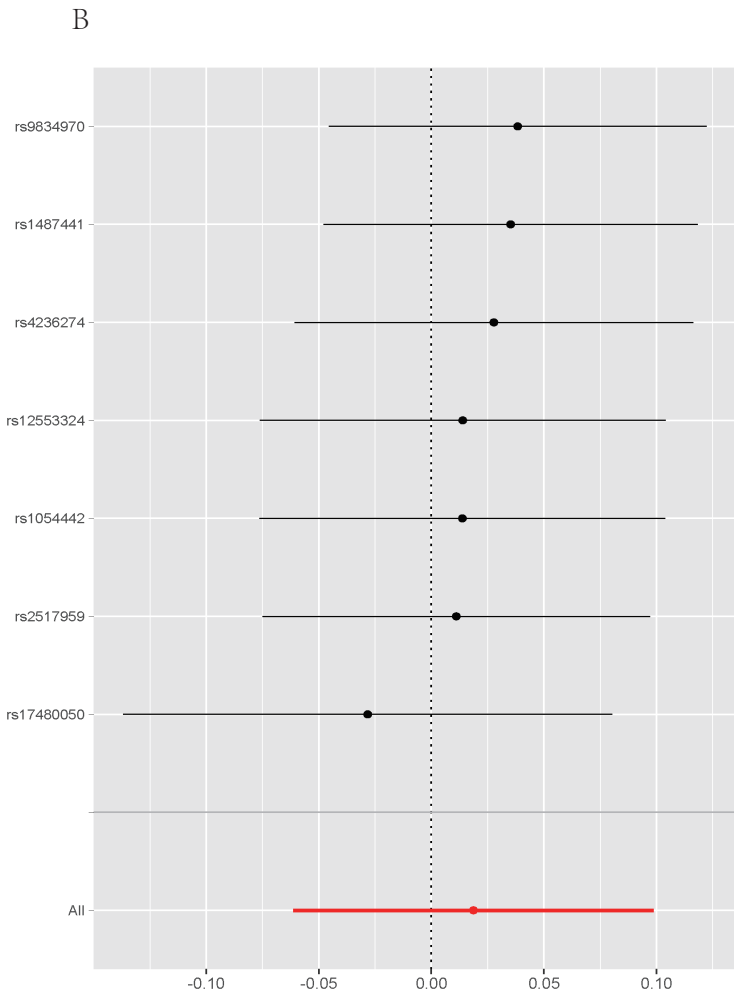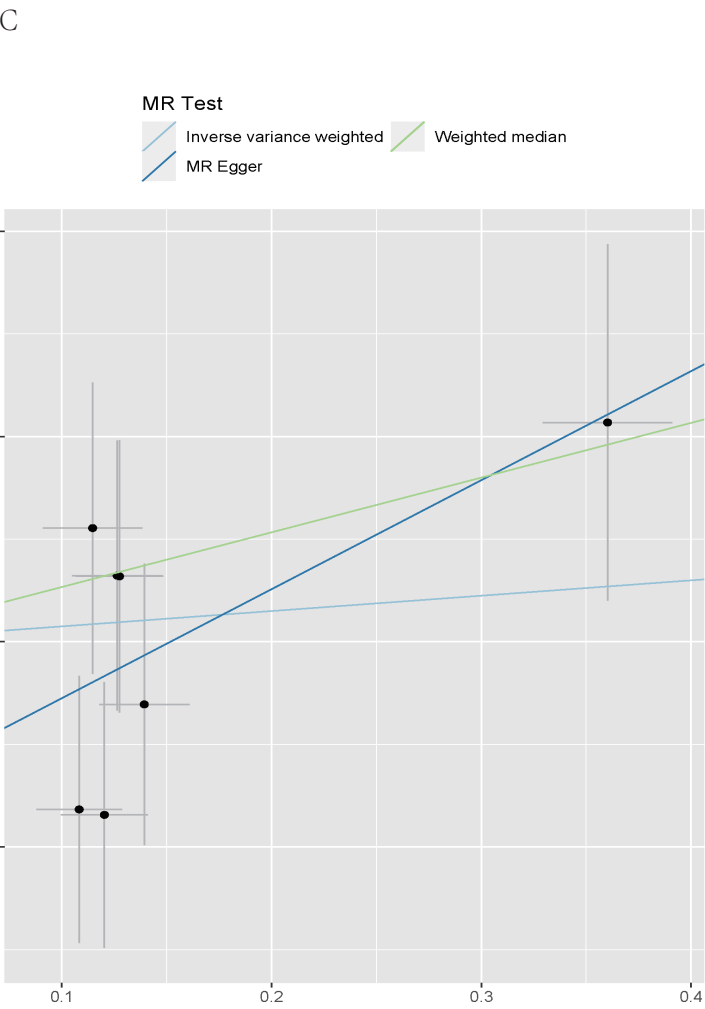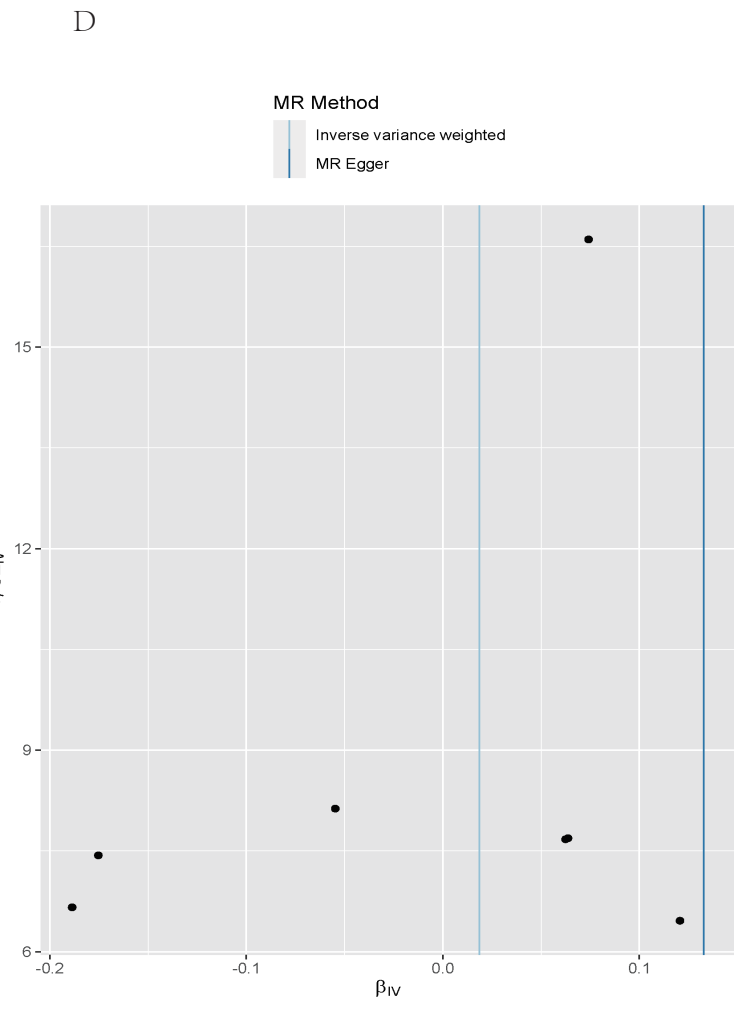

Supplementary Figure S7. Forest plot (A), Leave-one-out plot (B), scatter plot (C) and funnel plot (D) of the causal effect of mania on NAFLD.

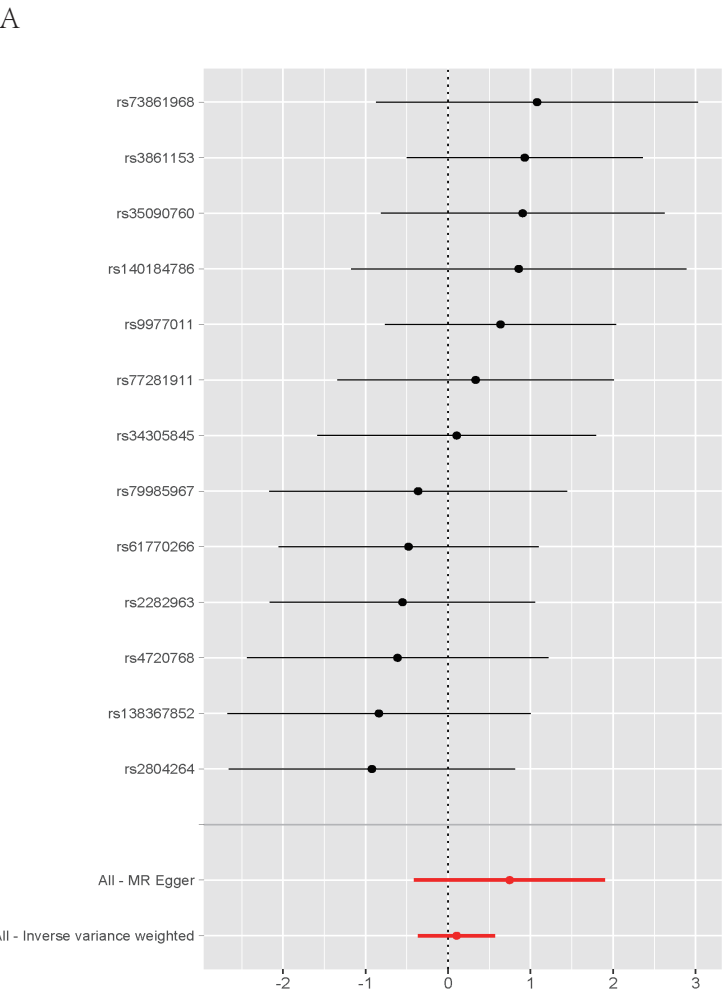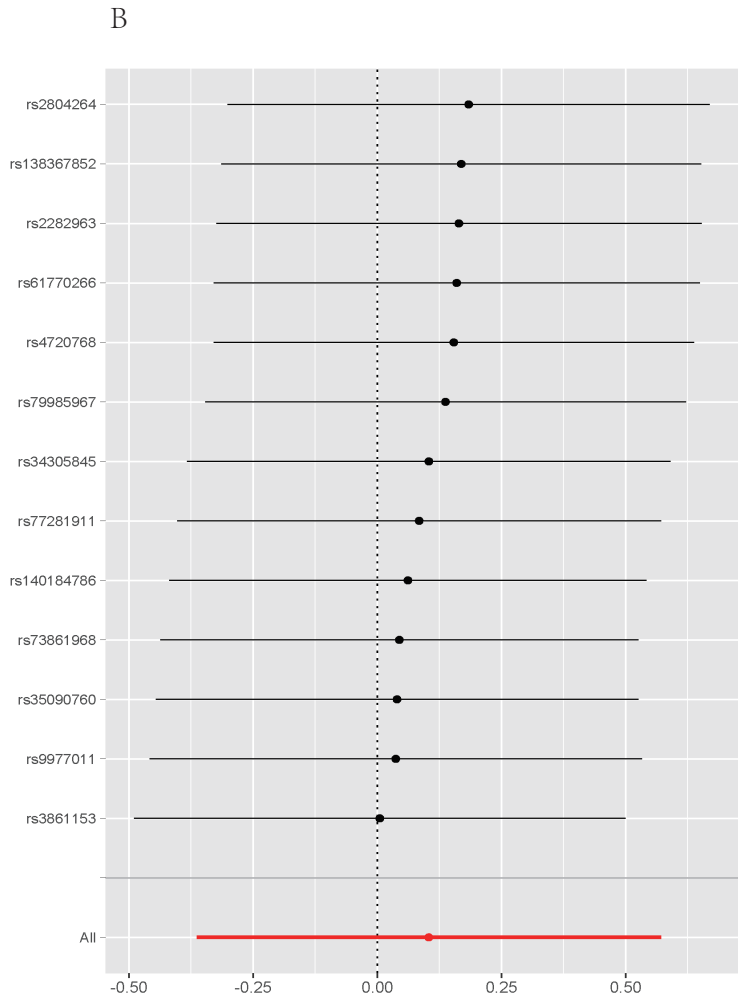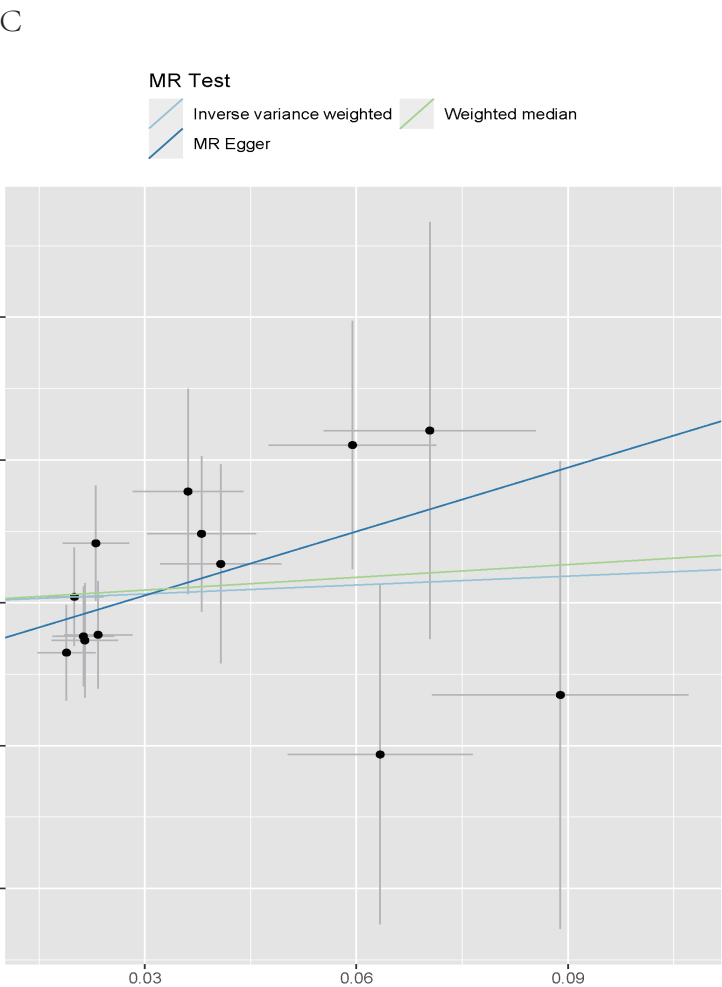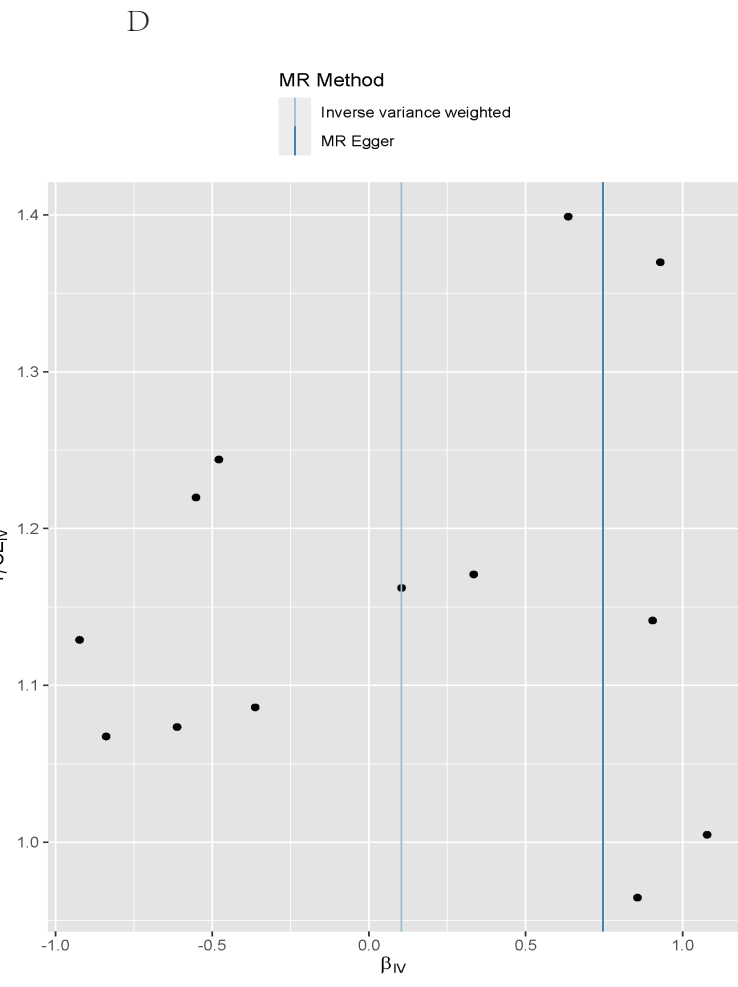

Supplementary Figure S8. Forest plot (A), Leave-one-out plot (B), scatter plot (C) and funnel plot (D) of the causal effect of Alzheimer's disease on NAFLD.

A

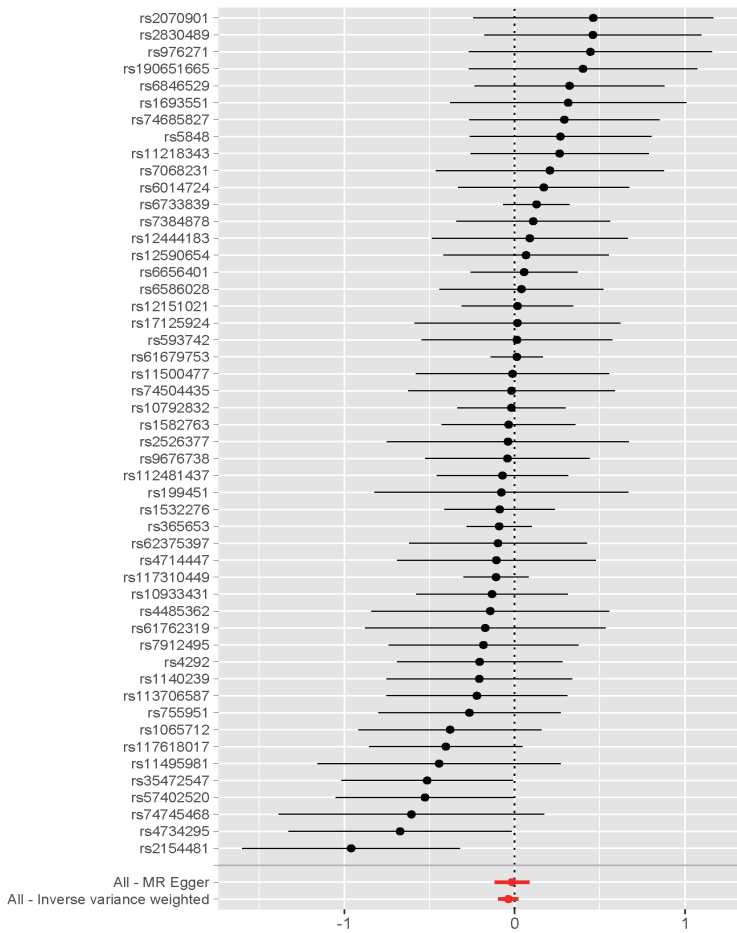

B

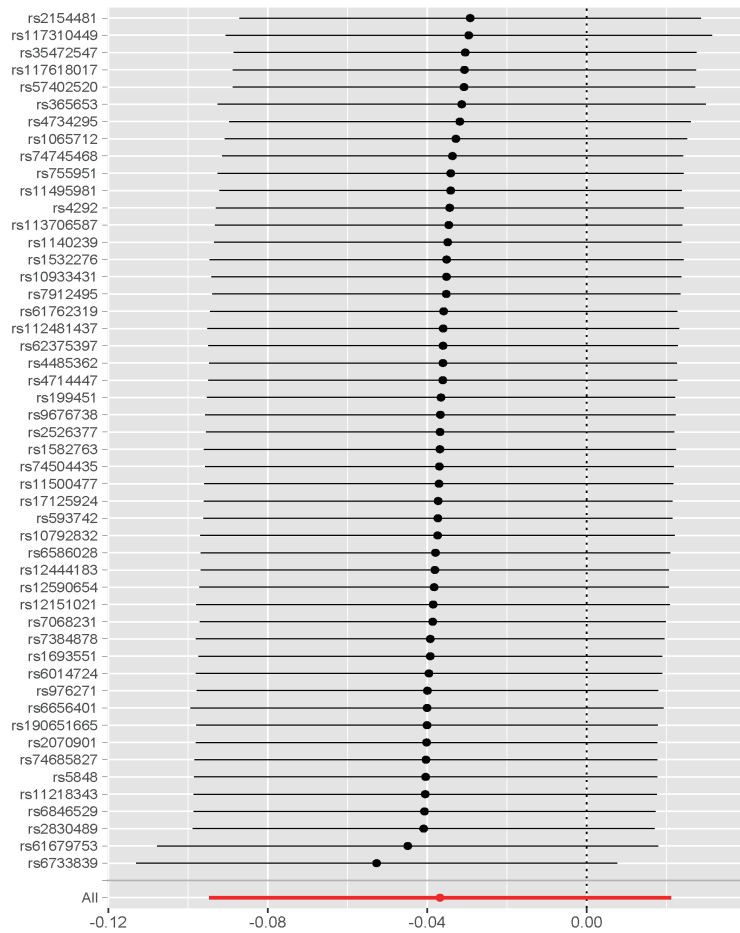

C

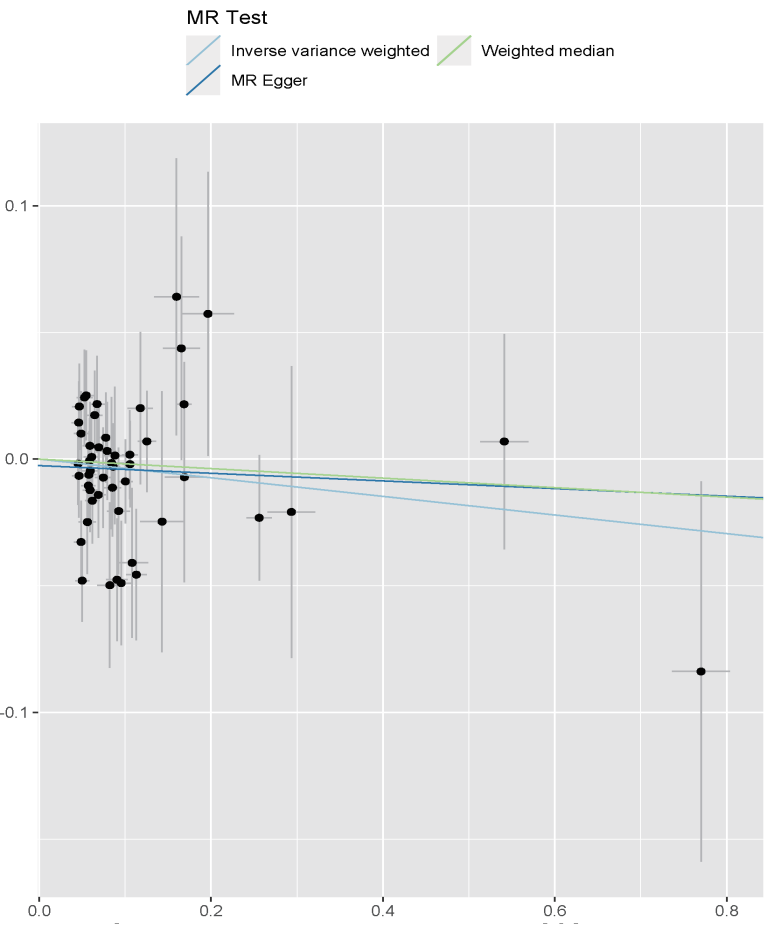

D

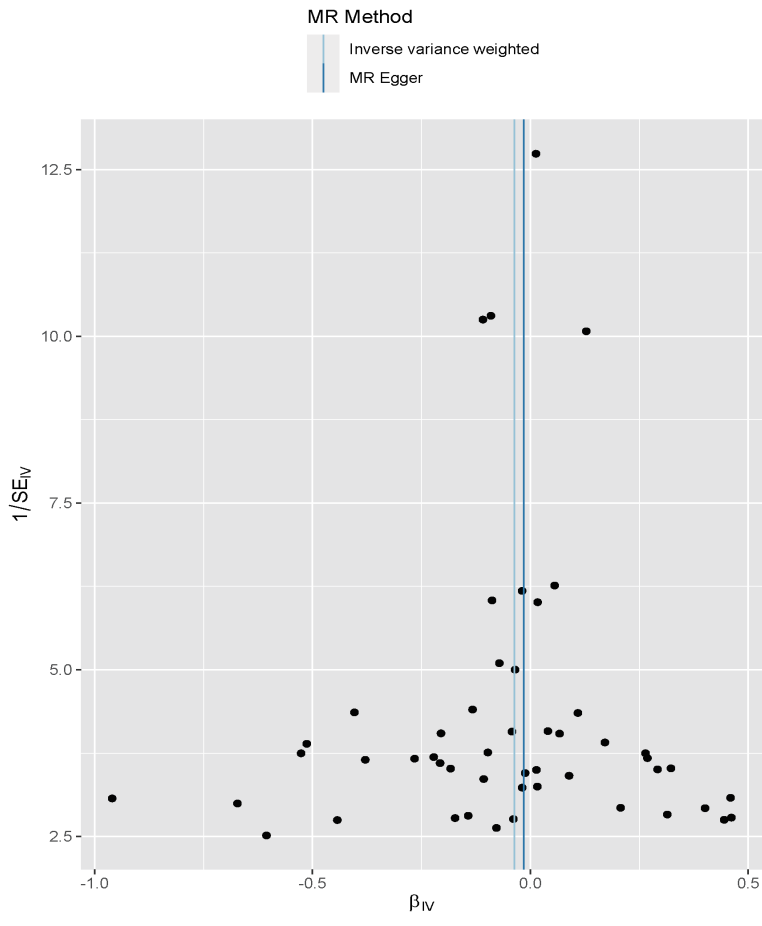

Supplementary Figure S9. Forest plot (A), Leave-one-out plot (B), scatter plot (C) and funnel plot (D) of the causal effect of Parkinson's disease on NAFLD.

A

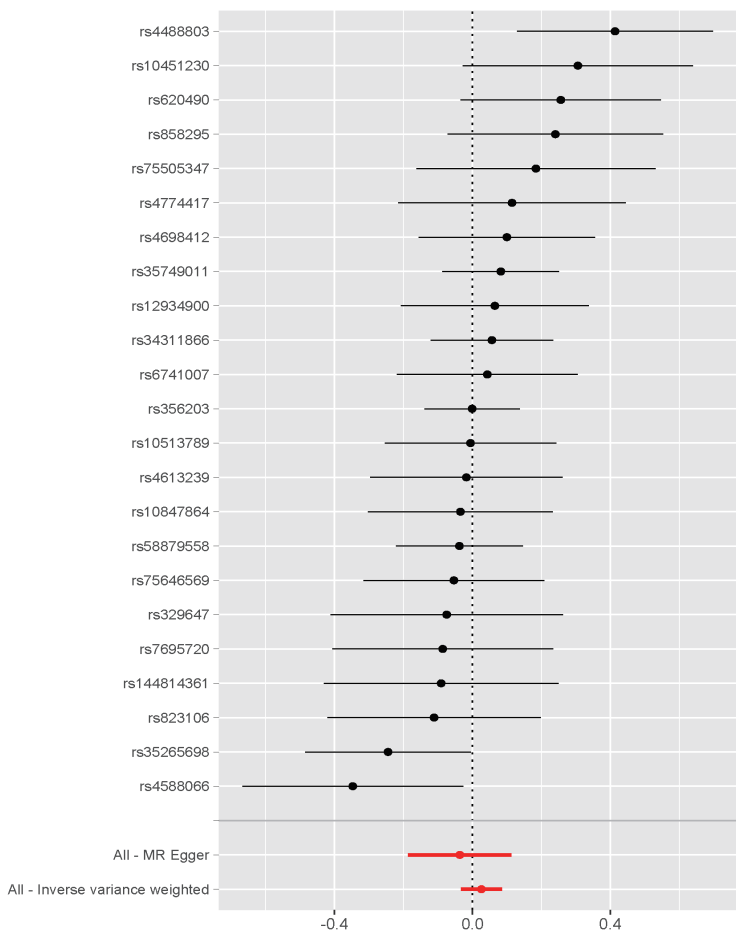

B

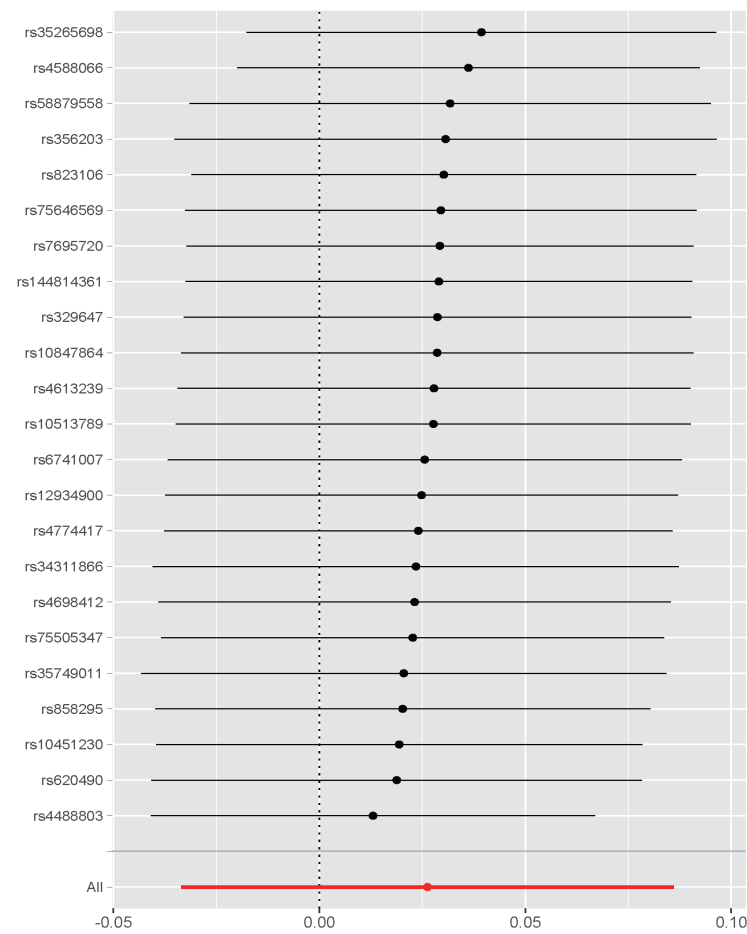

C

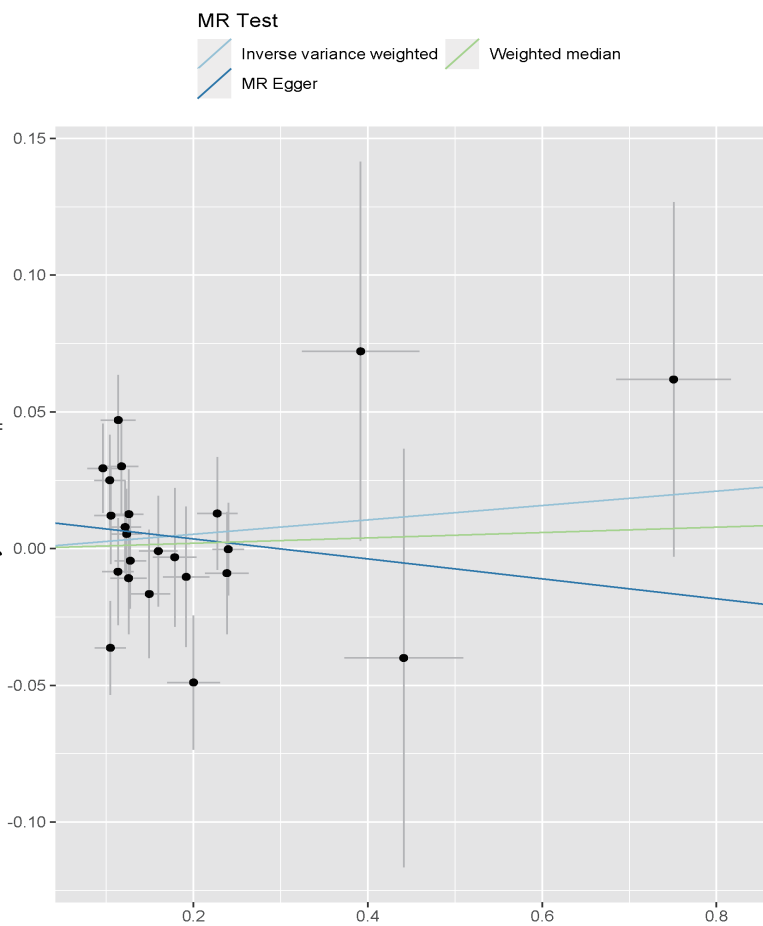

D

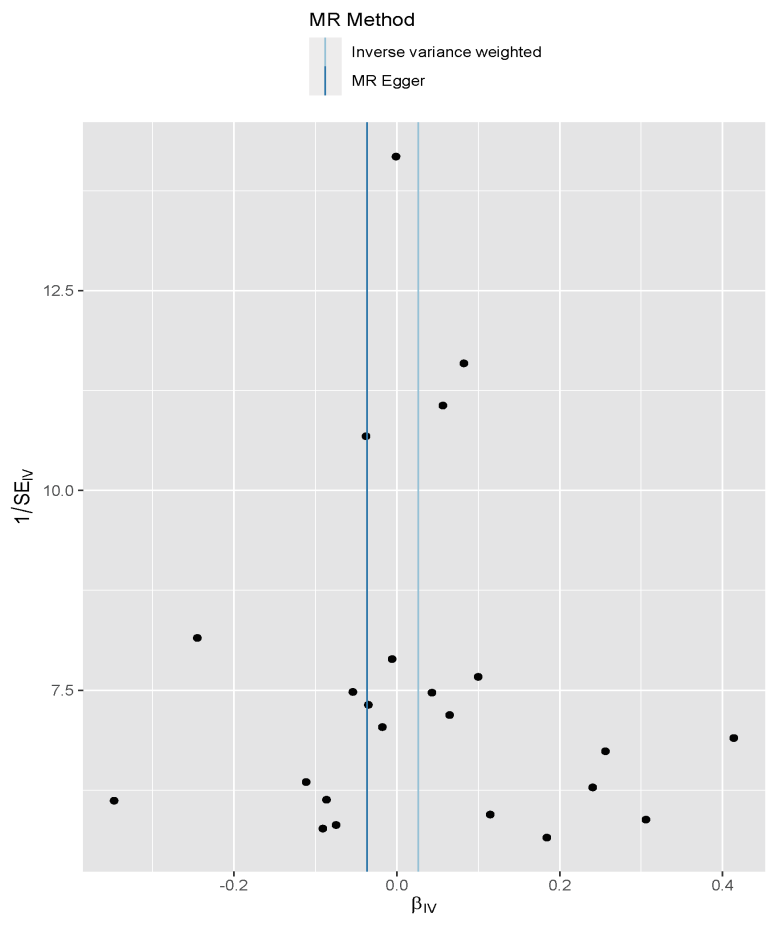

Supplementary Figure S10. Forest plot (A), Leave-one-out plot (B), scatter plot (C) and funnel plot (D) of the causal effect of epilepsy on NAFLD.

A

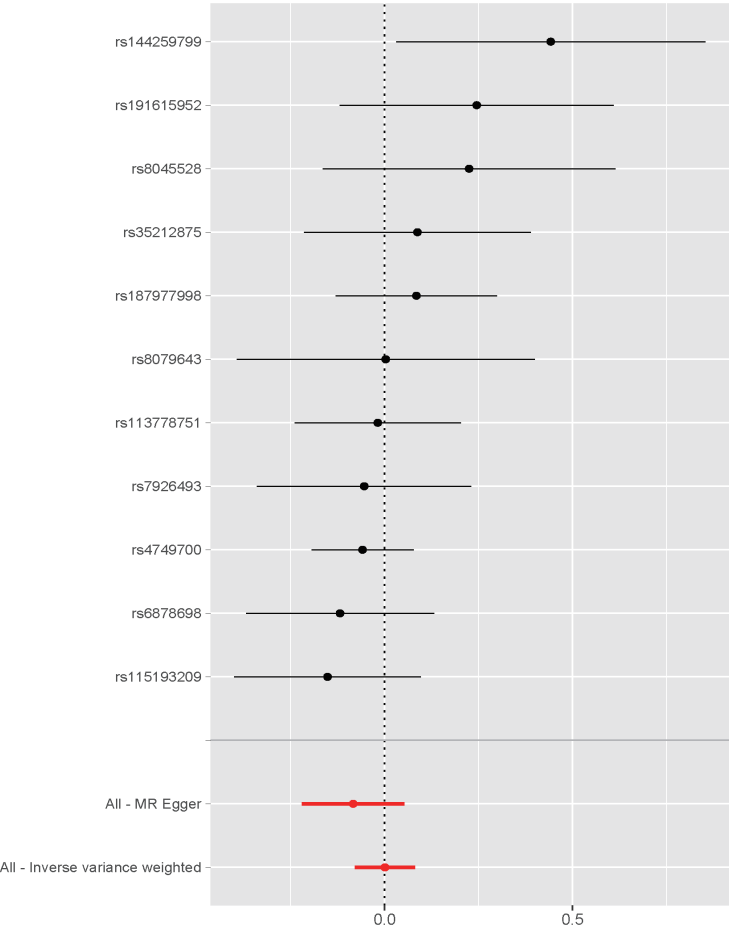

B

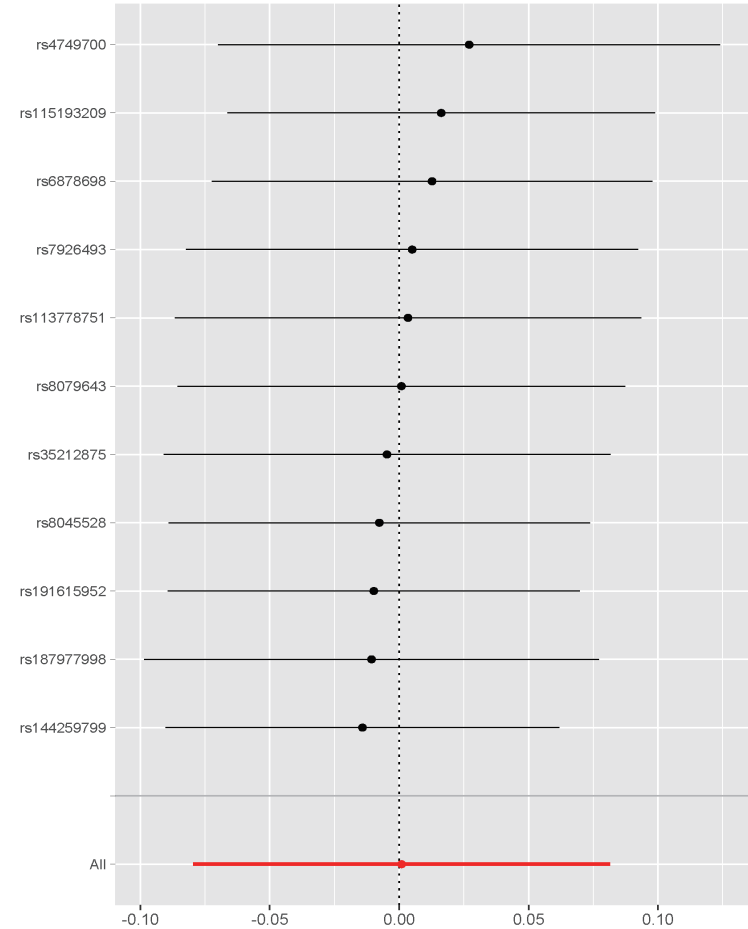

C

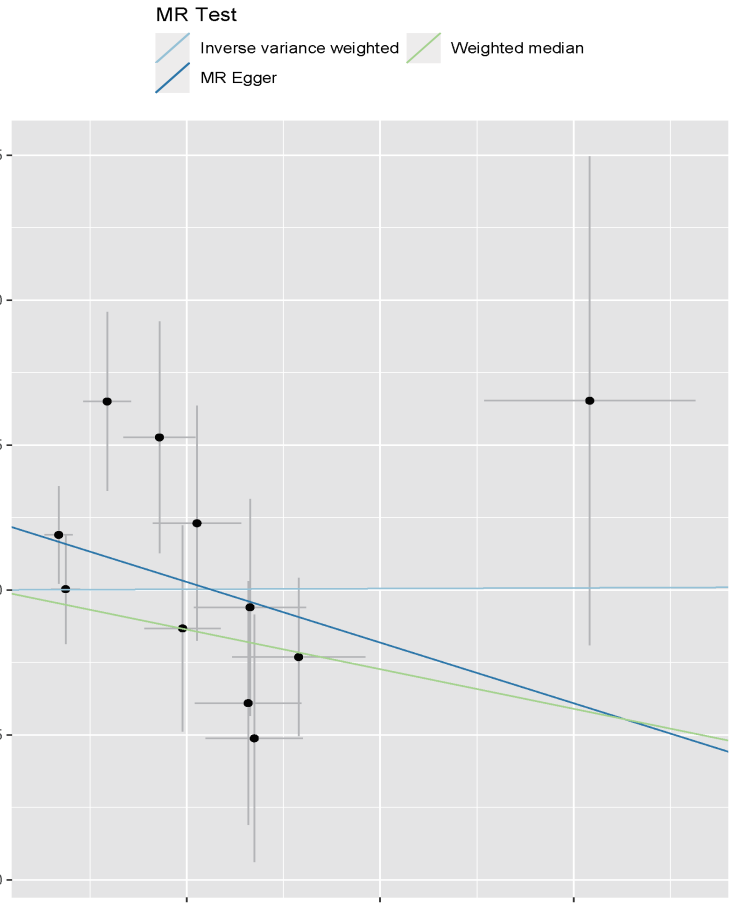

D

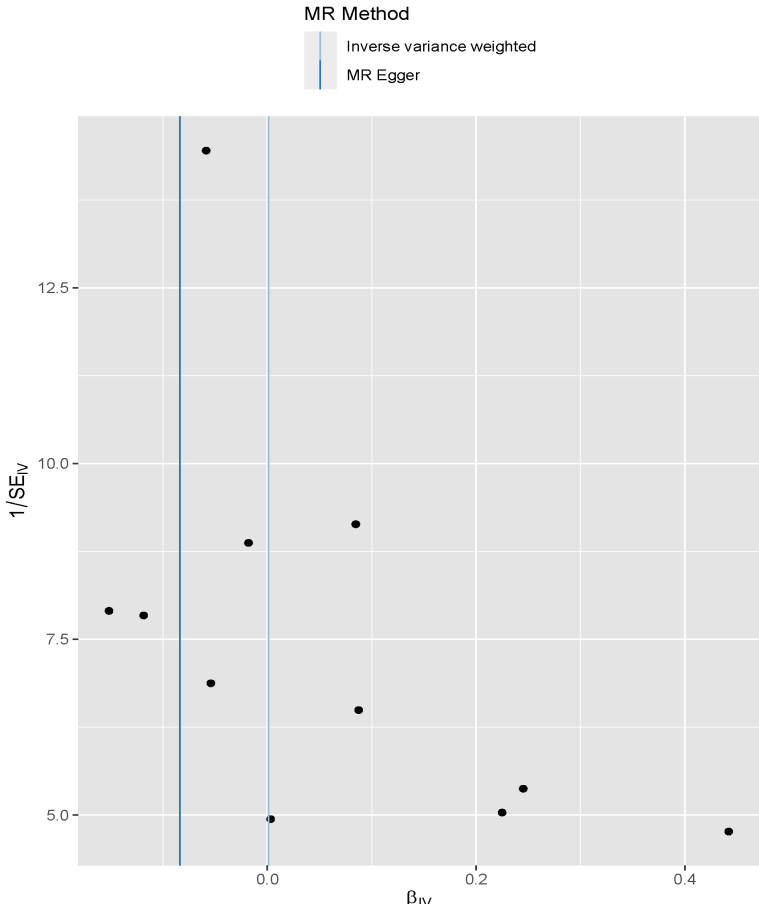

Supplementary Figure S11. Forest plot (A), Leave-one-out plot (B), scatter plot (C) and funnel plot (D) of the causal effect of Amyotrophic lateral sclerosis on NAFLD.

A

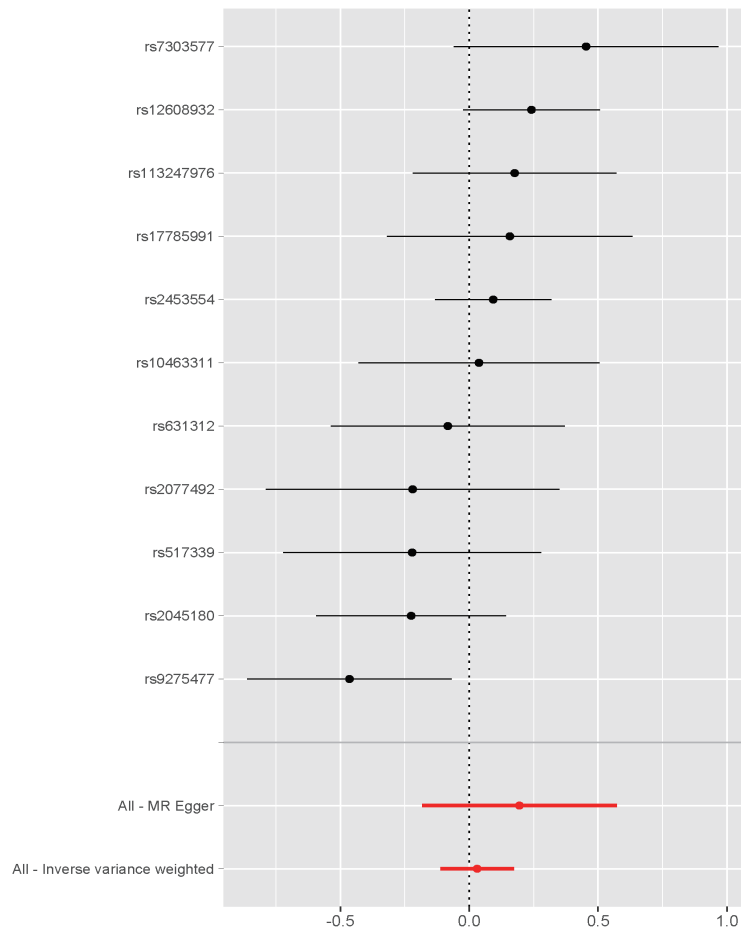

B

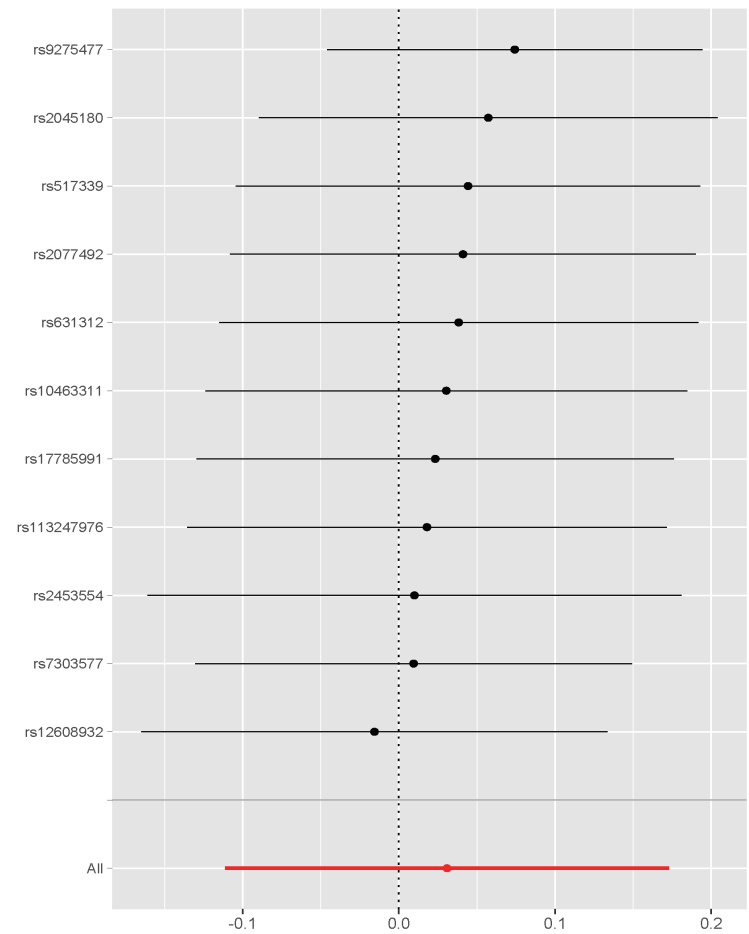

C

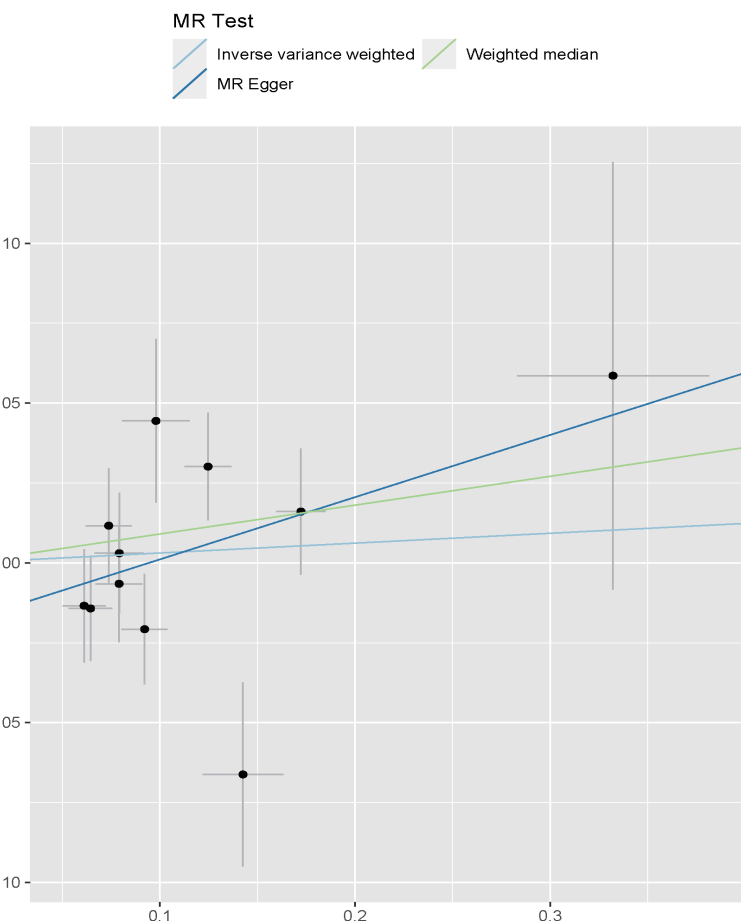

D

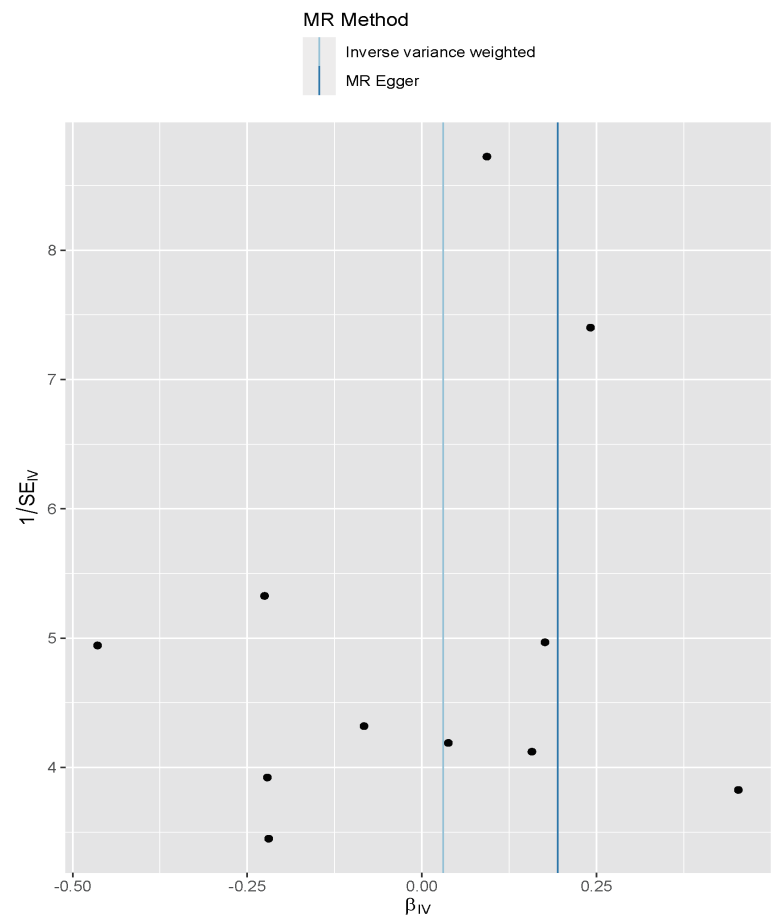

Supplementary Figure S12. Forest plot (A), Leave-one-out plot (B), scatter plot (C) and funnel plot (D) of the causal effect of migraines on NAFLD.

A

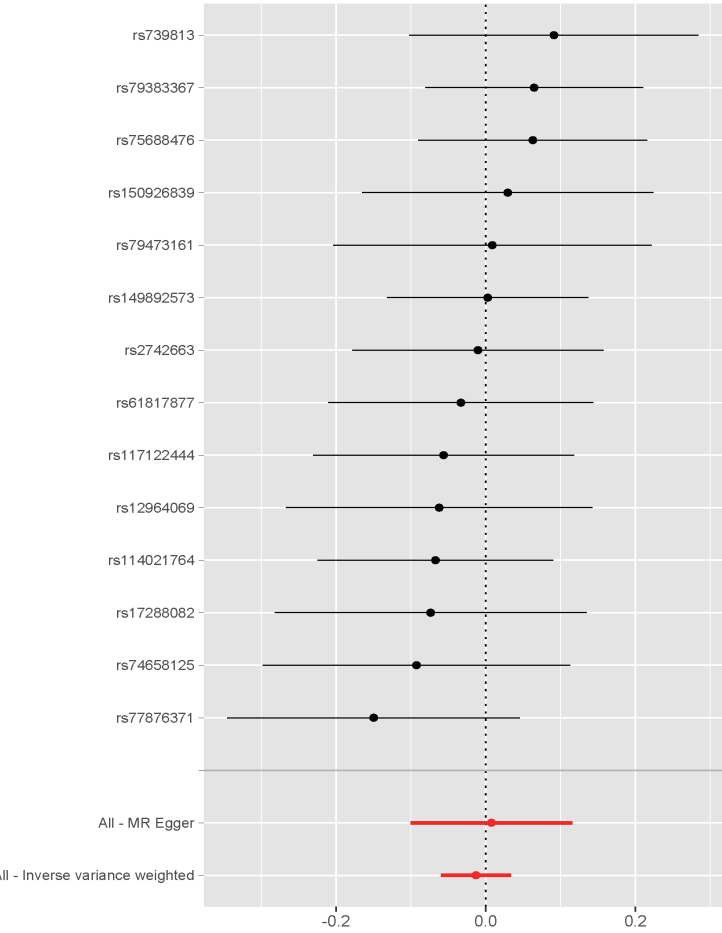

B

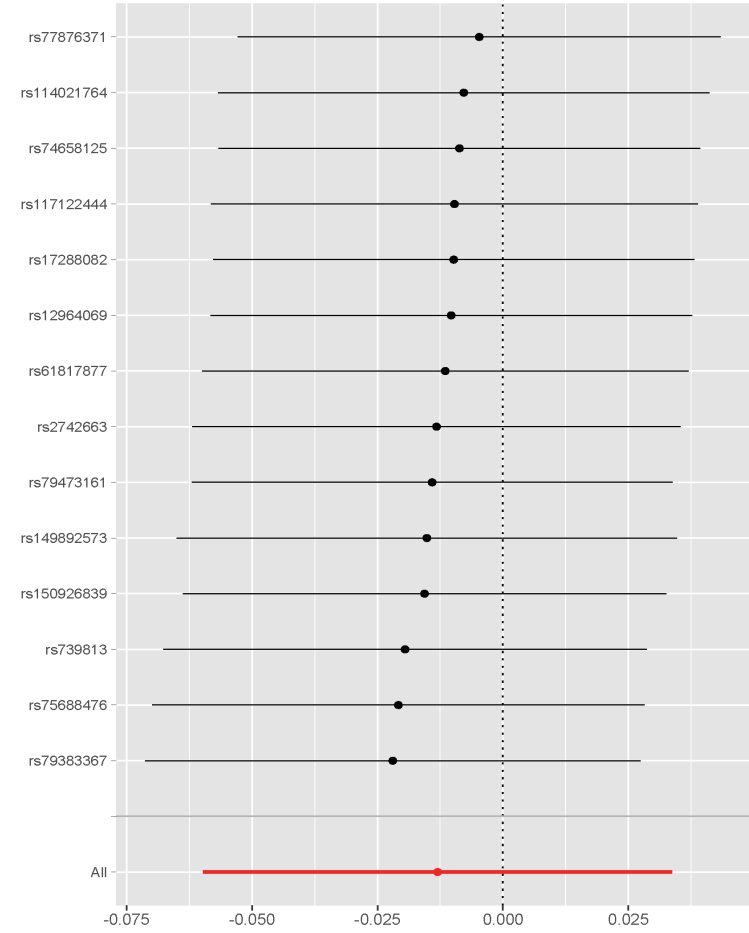

C

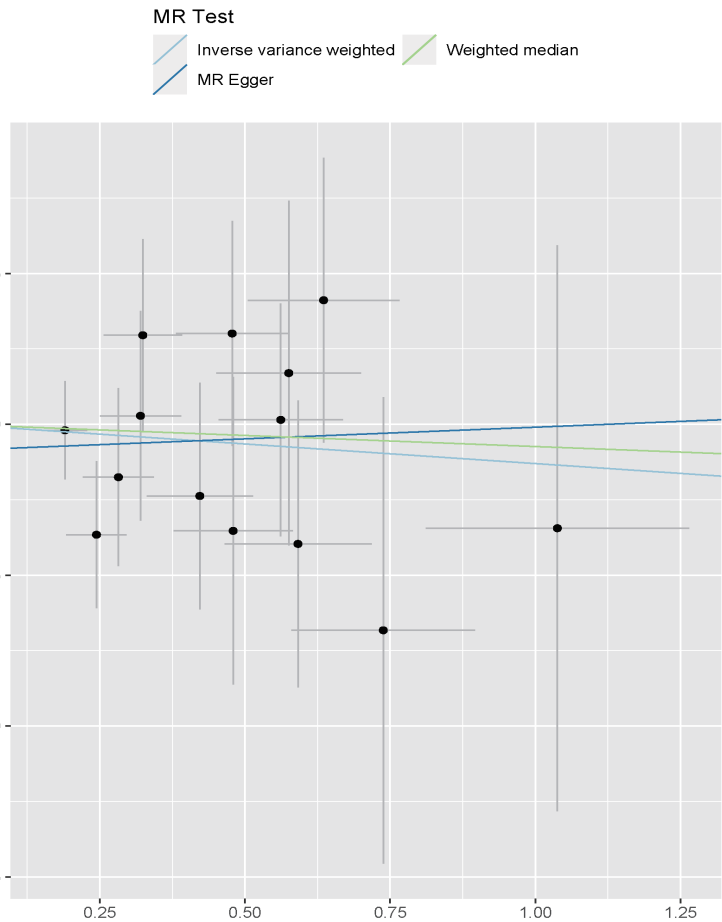

D

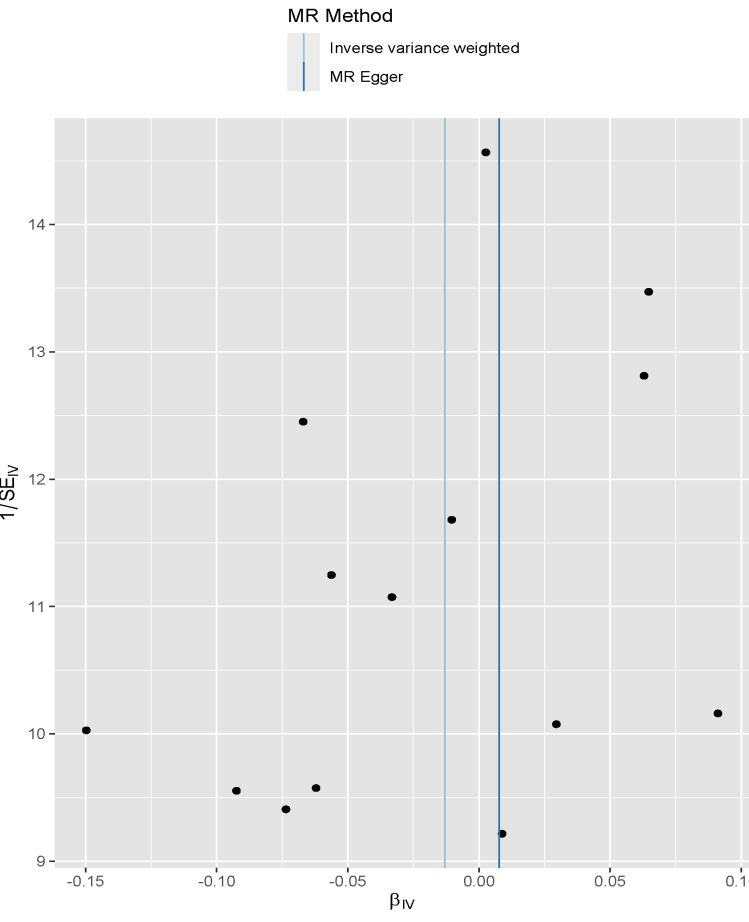



Supplementary Figure S13. Forest plot (A), Leave-one-out plot (B), scatter plot (C) and funnel plot (D) of the causal effect of NAFLD on anxiety.

A

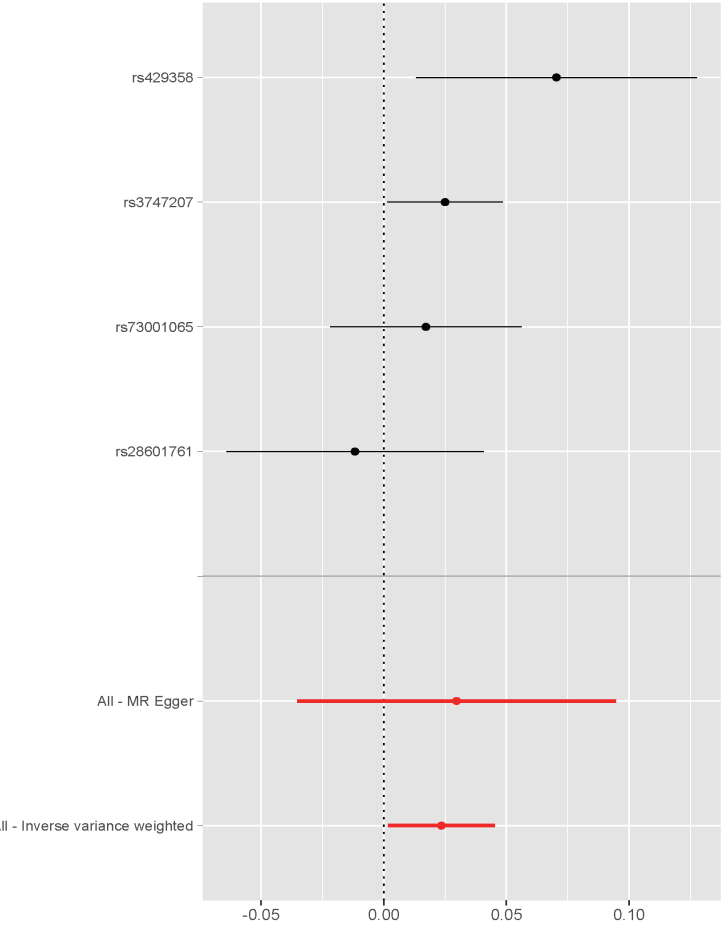

B

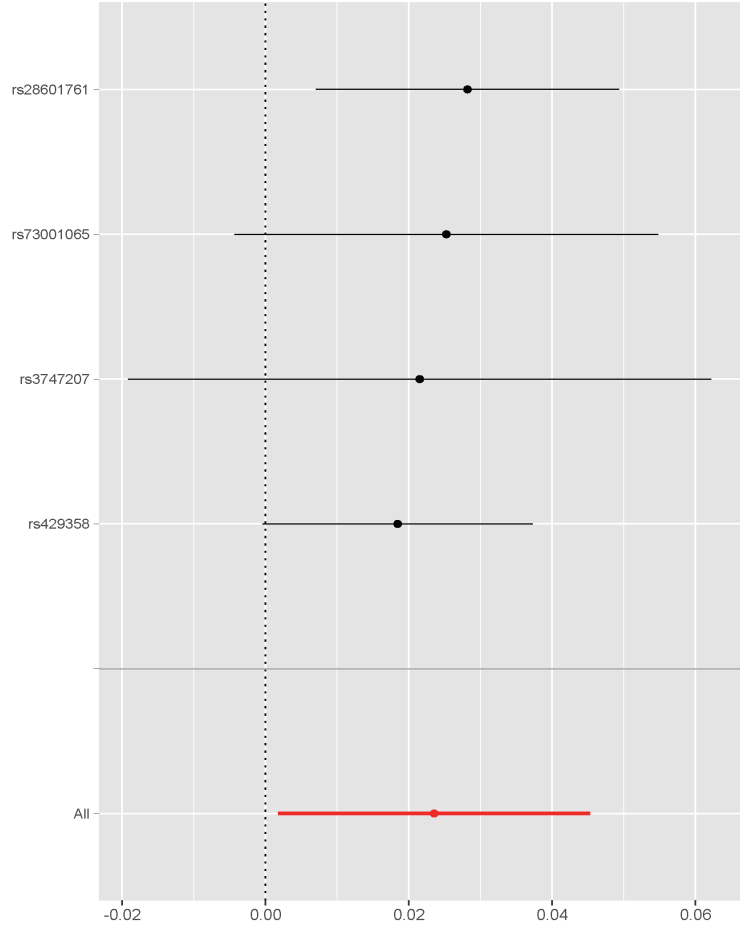

C

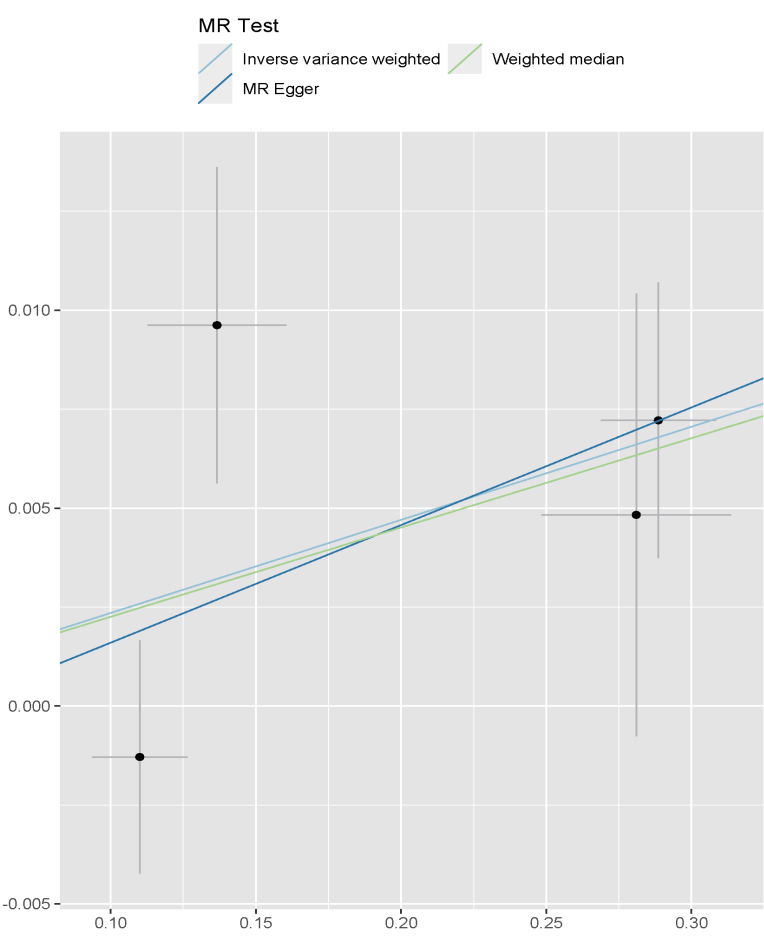

D

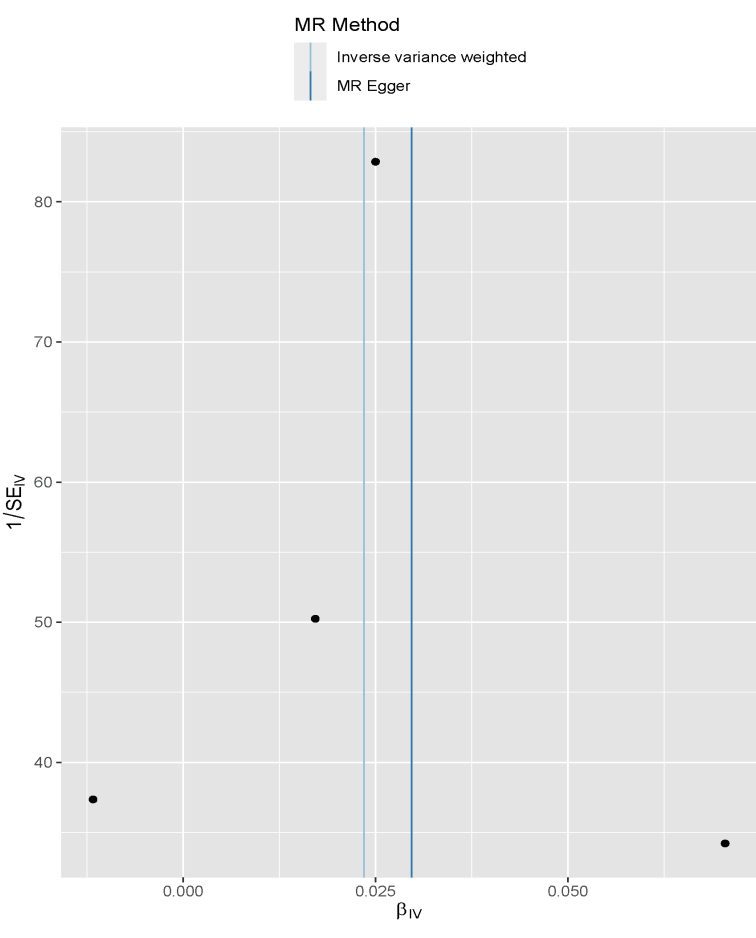

Supplementary Figure S14. Forest plot (A), Leave-one-out plot (B), scatter plot (C) and funnel plot (D) of the causal effect of NAFLD on schizophrenia.

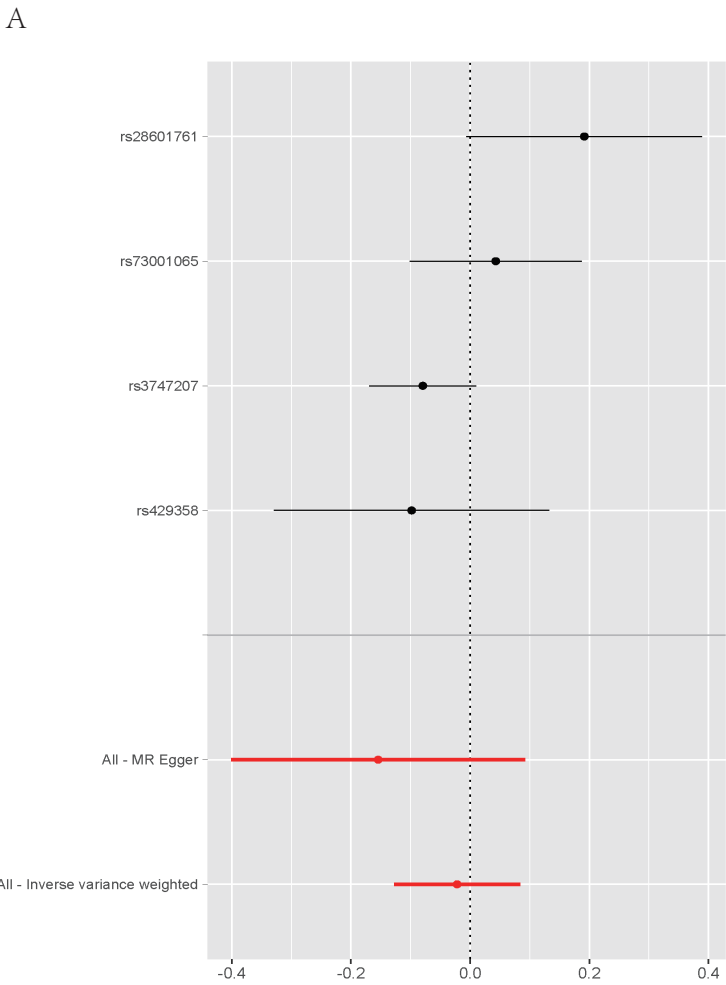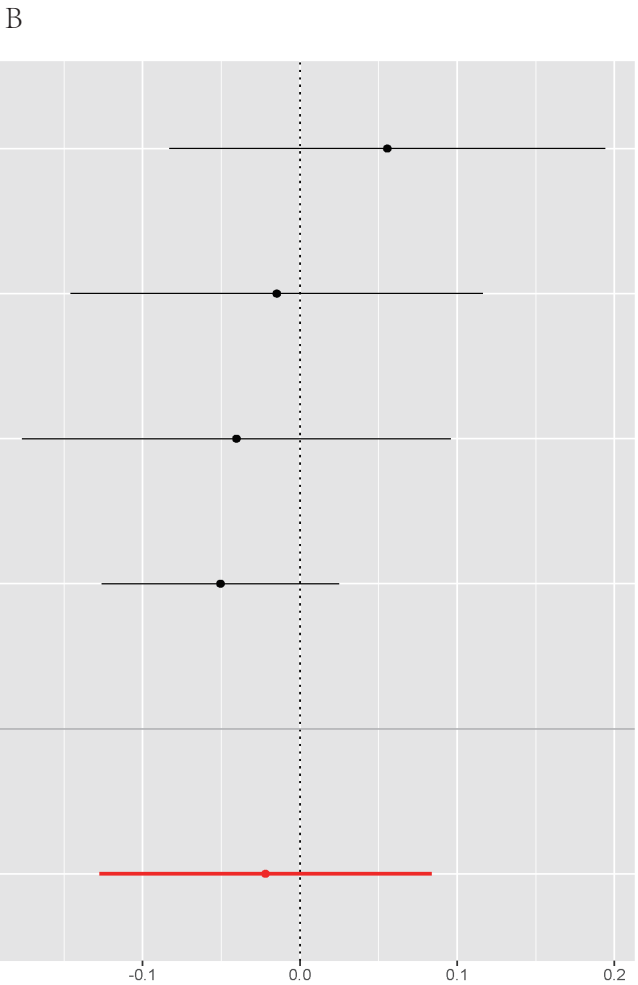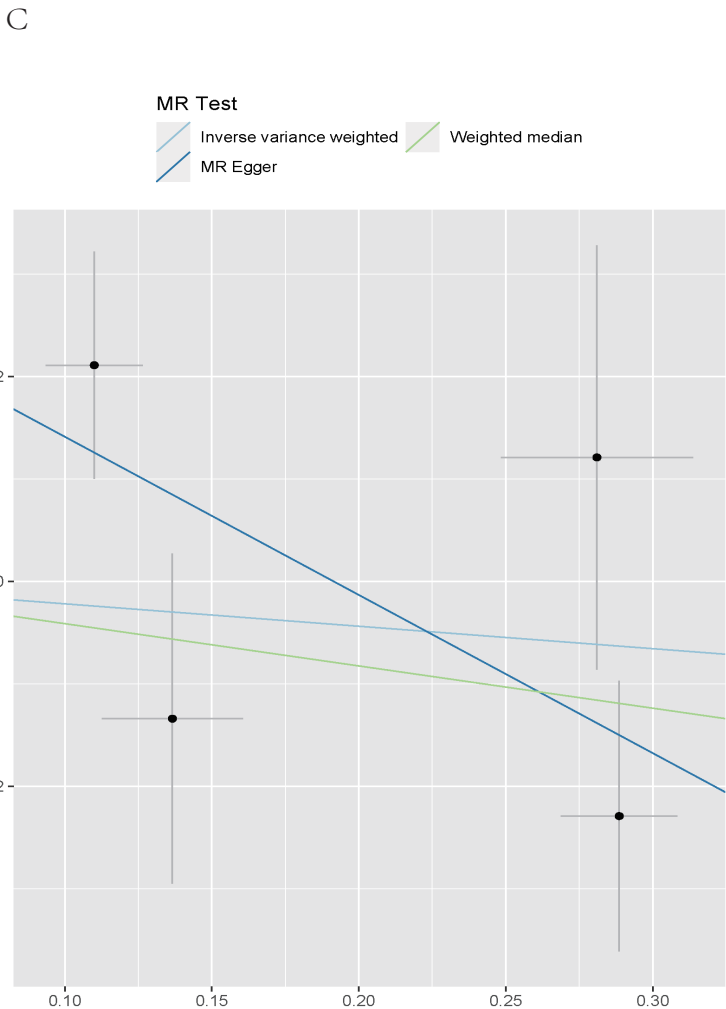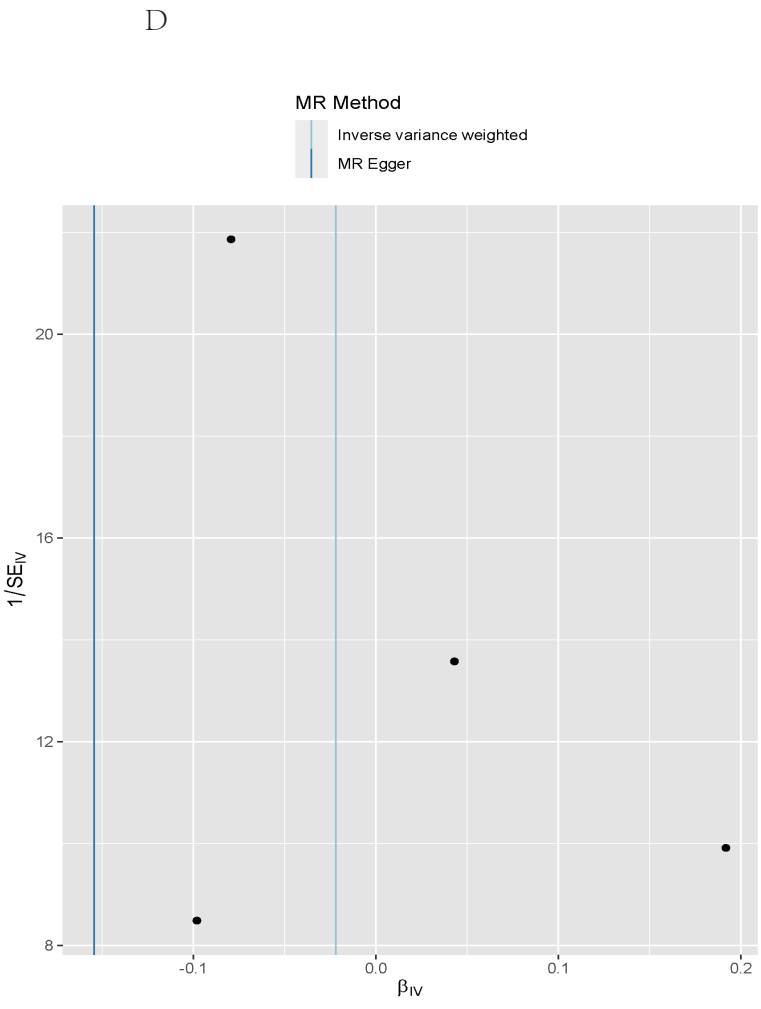

Supplementary Figure S15. Forest plot (A), Leave-one-out plot (B), scatter plot (C) and funnel plot (D) of the causal effect of NAFLD on Post-traumatic stress disorder.

A

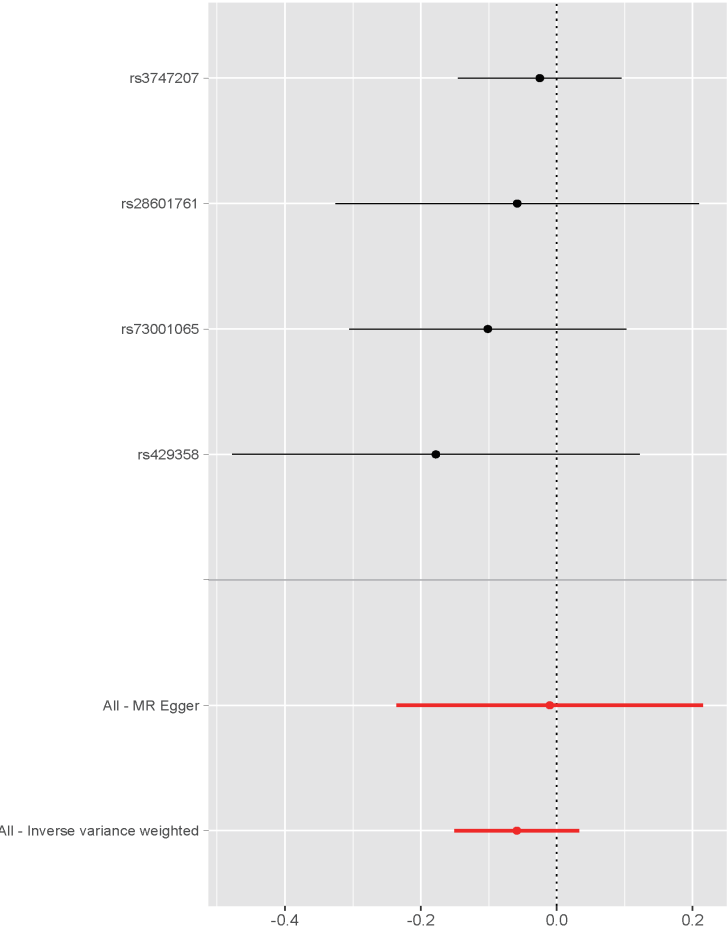

B

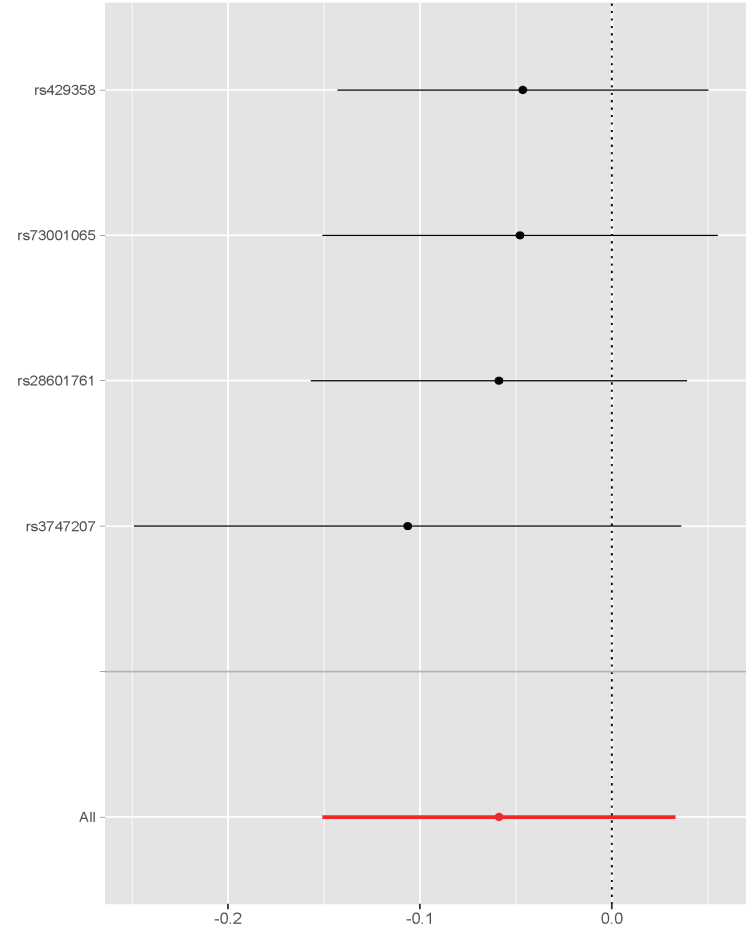

C

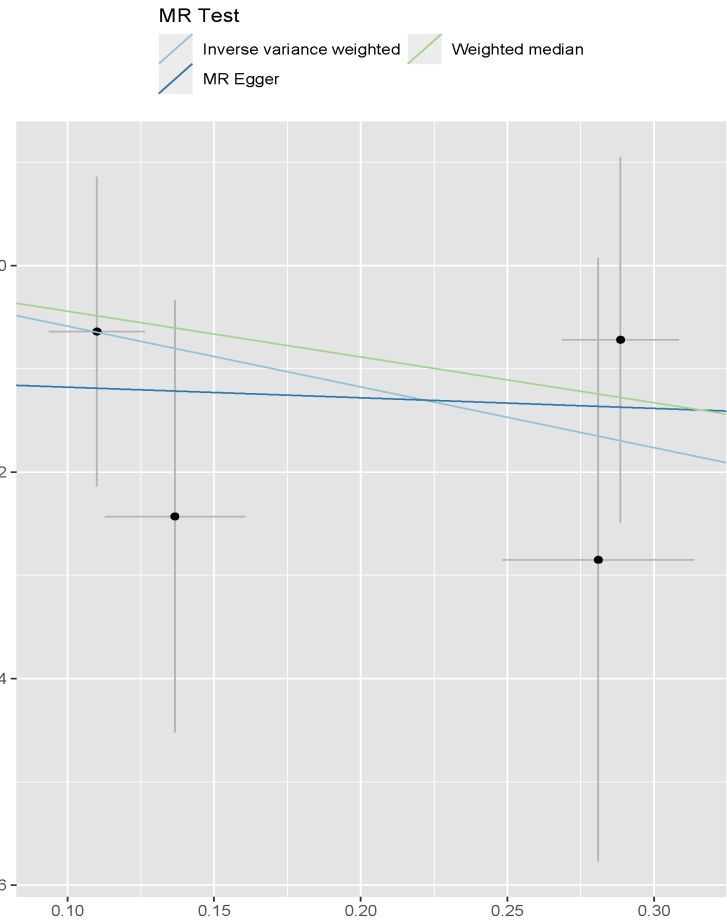

D

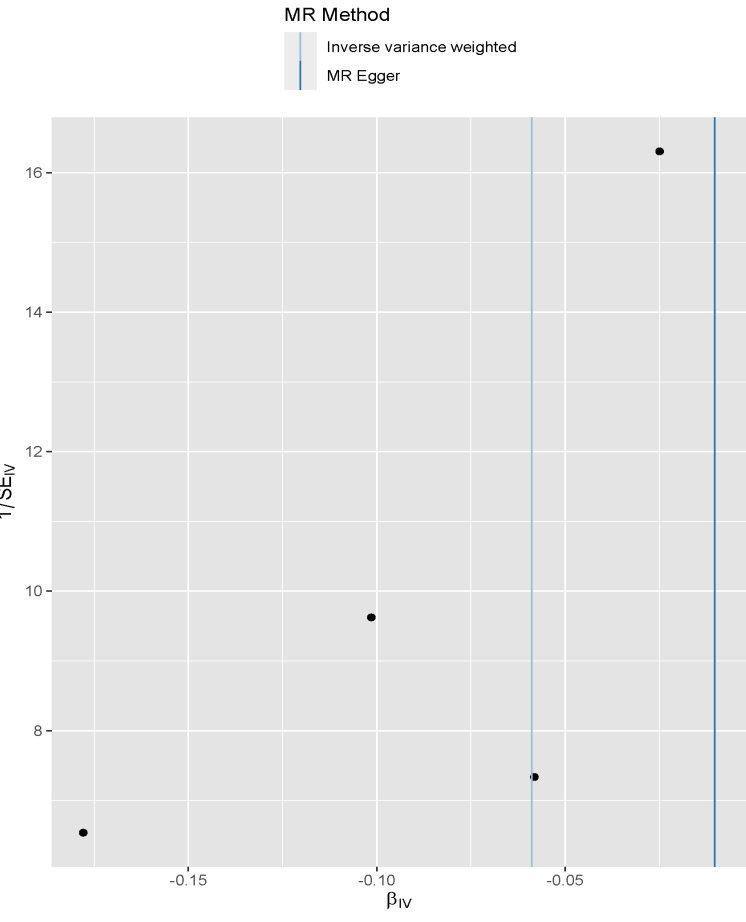

Supplementary Figure S16. Forest plot (A), Leave-one-out plot (B), scatter plot (C) and funnel plot (D) of the causal effect of NAFLD on Obsessive-compulsive disorder.

A

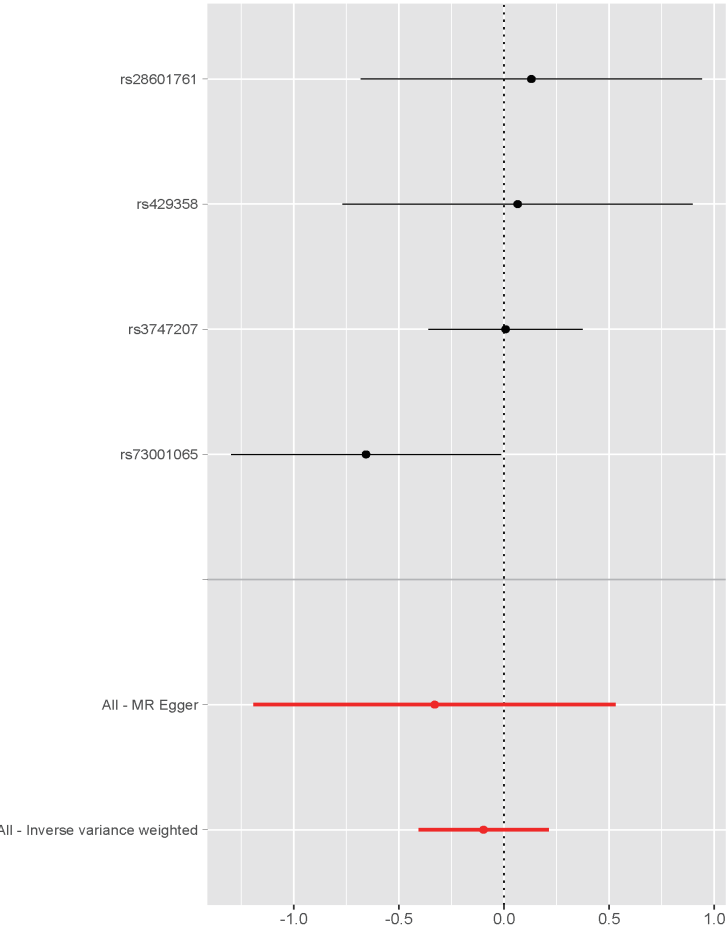

B

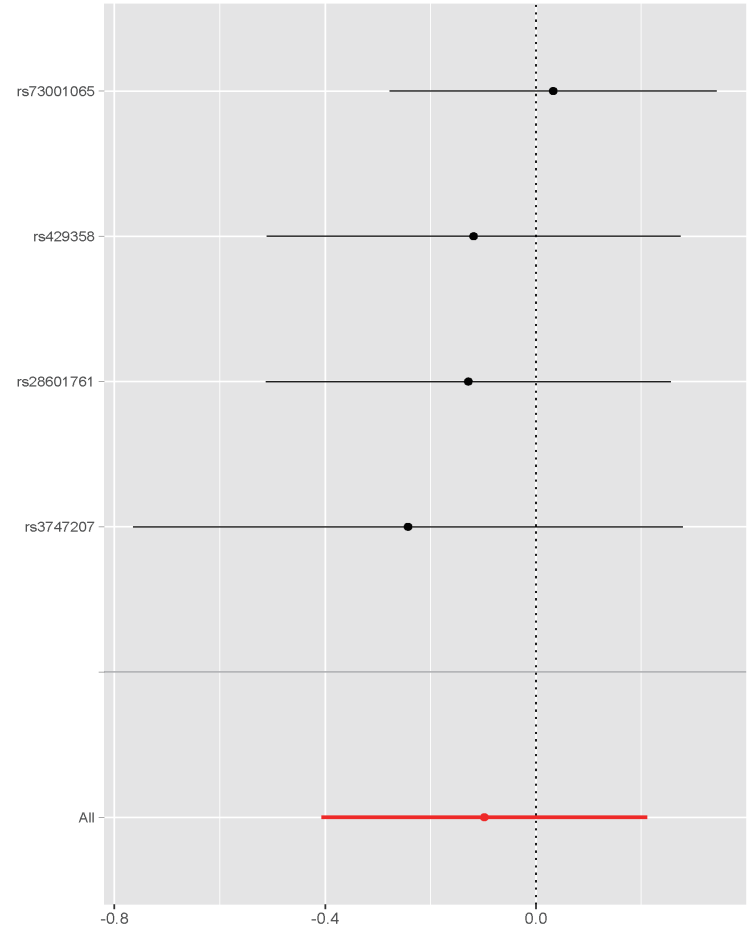

C

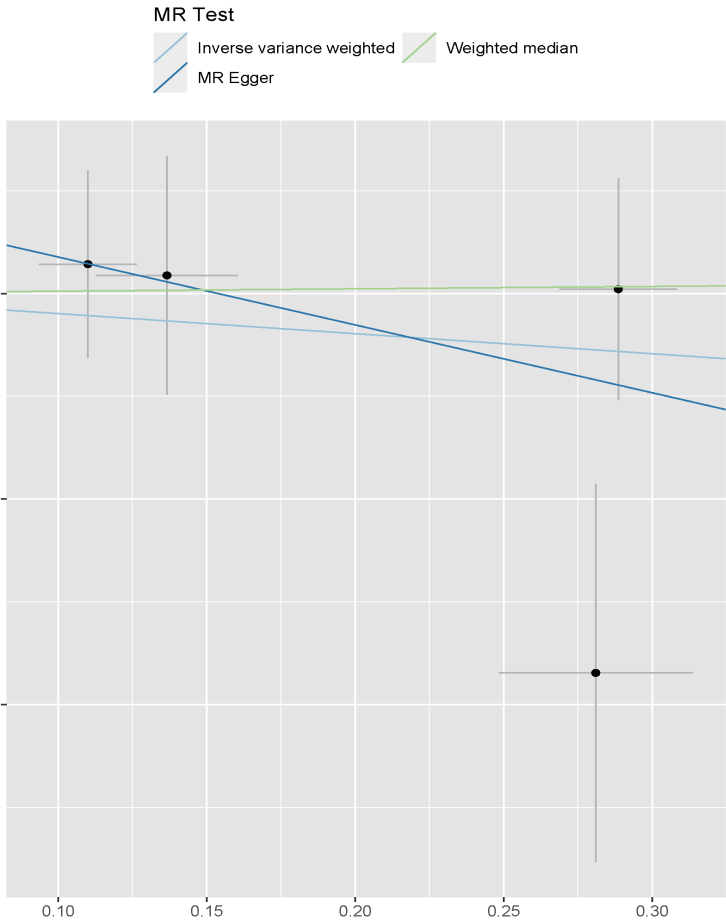

D

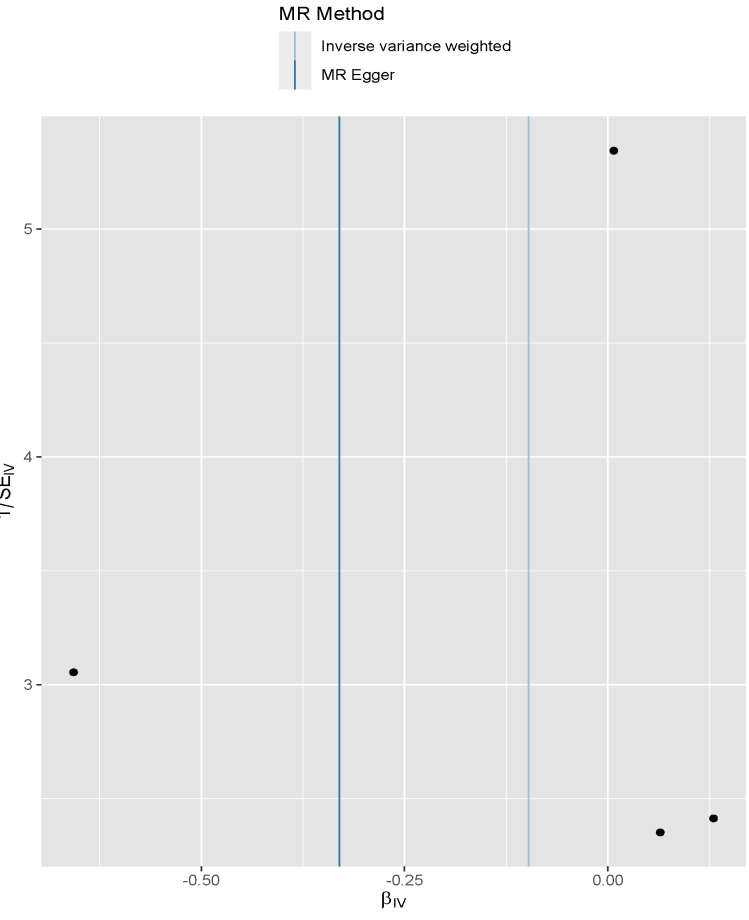

Supplementary Figure S17. Forest plot (A), Leave-one-out plot (B), scatter plot (C) and funnel plot (D) of the causal effect of NAFLD on Major Depressive Disorder.

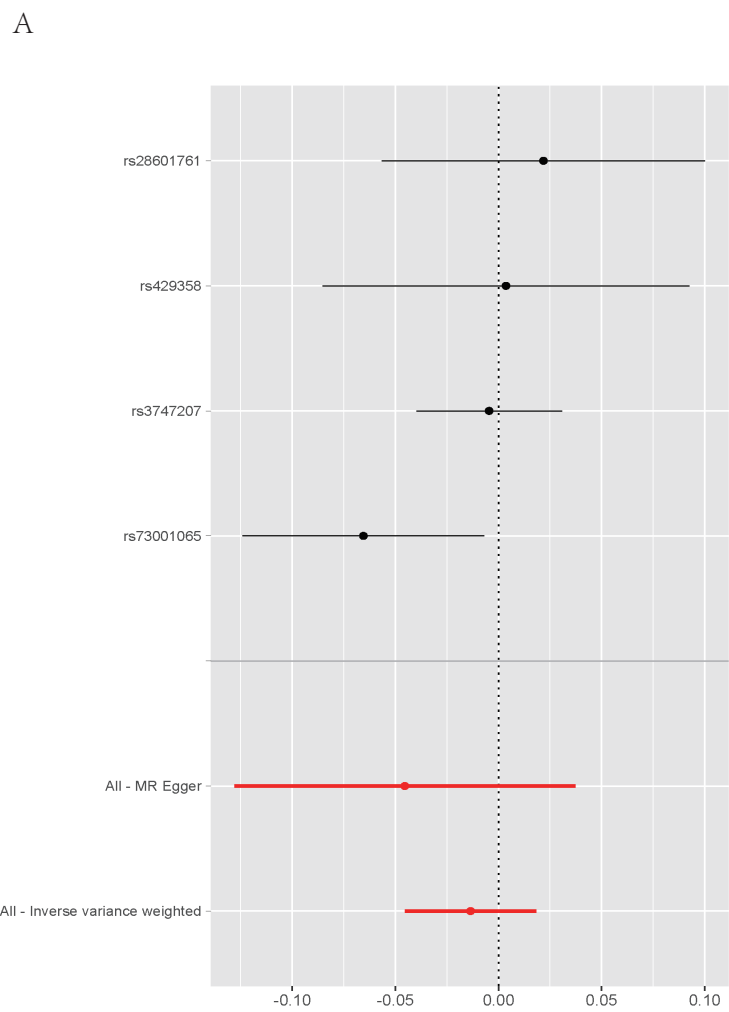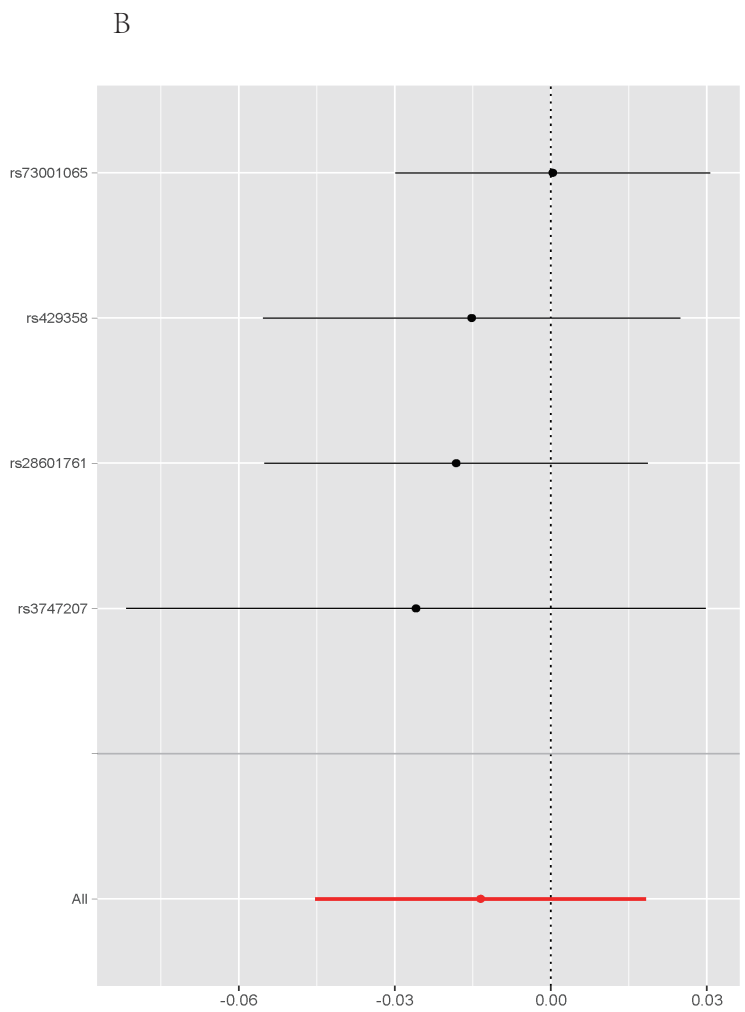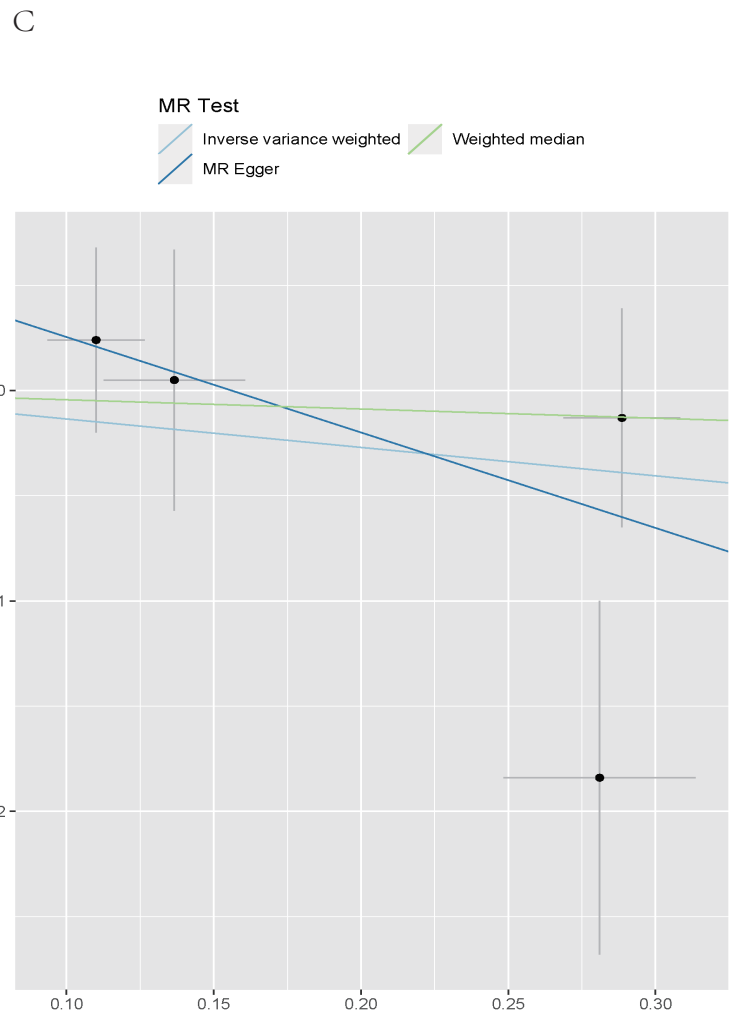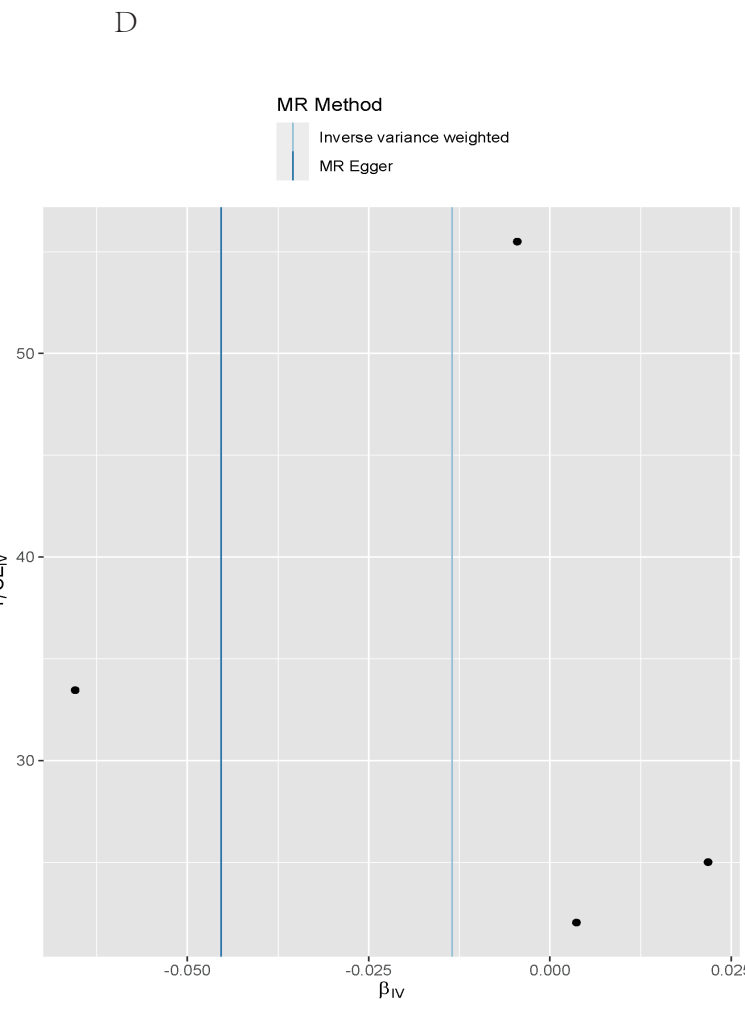

Supplementary Figure S18. Forest plot (A), Leave-one-out plot (B), scatter plot (C) and funnel plot (D) of the causal effect of NAFLD on Bipolar disorder.

A

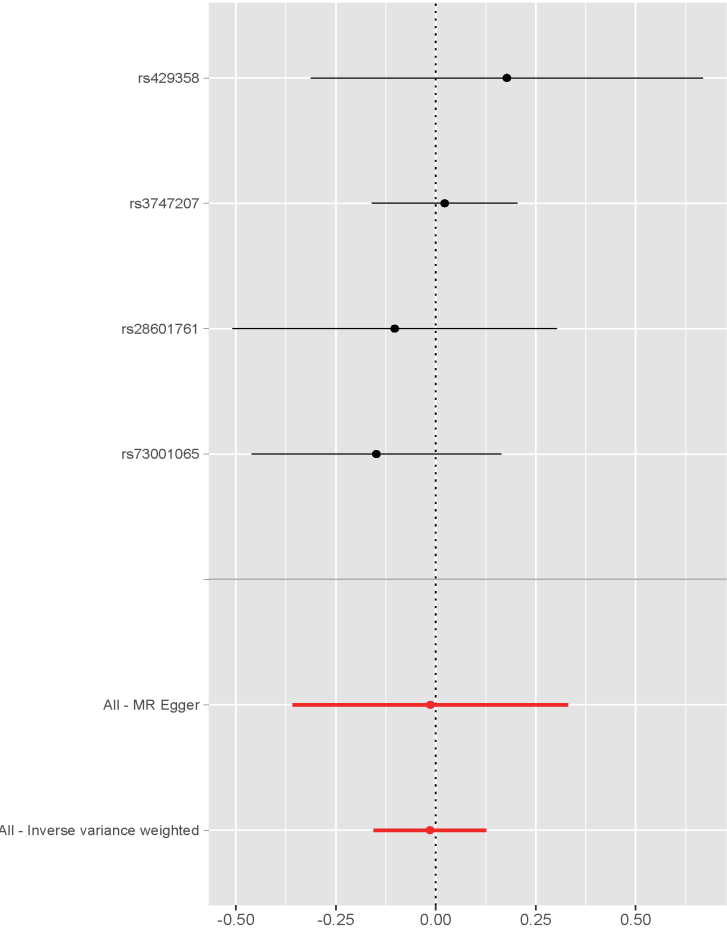

B

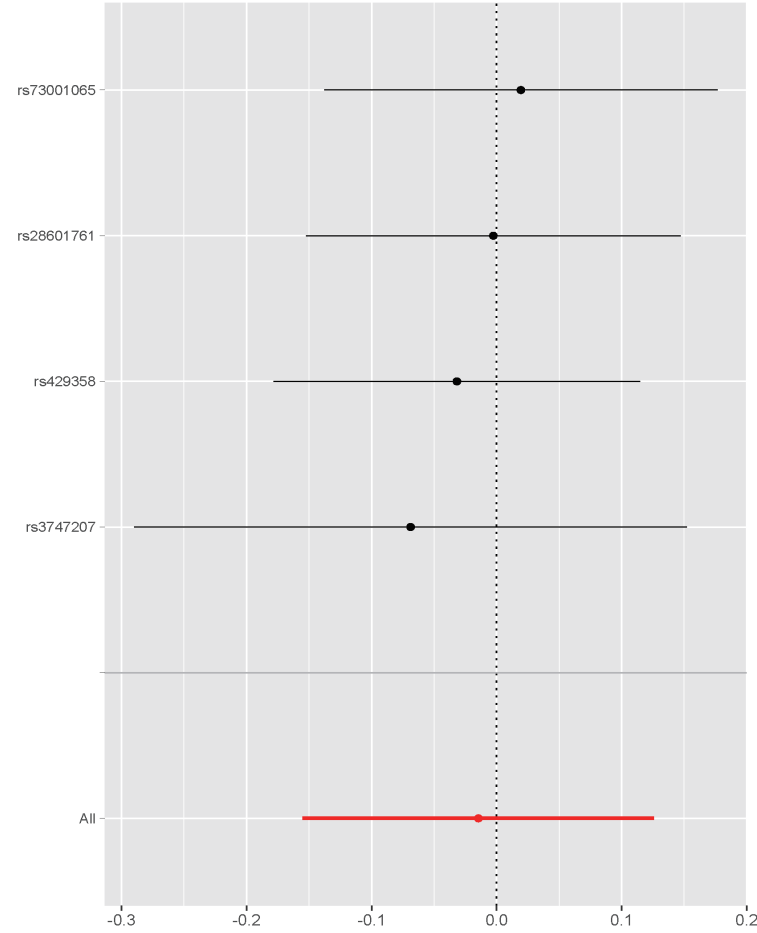

C

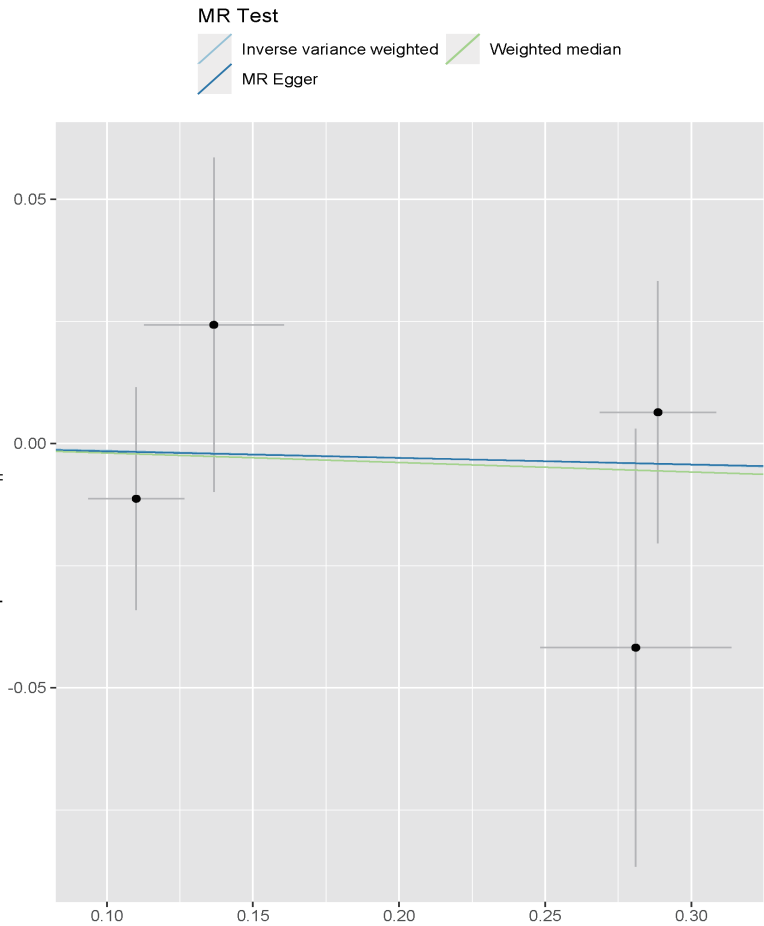

D

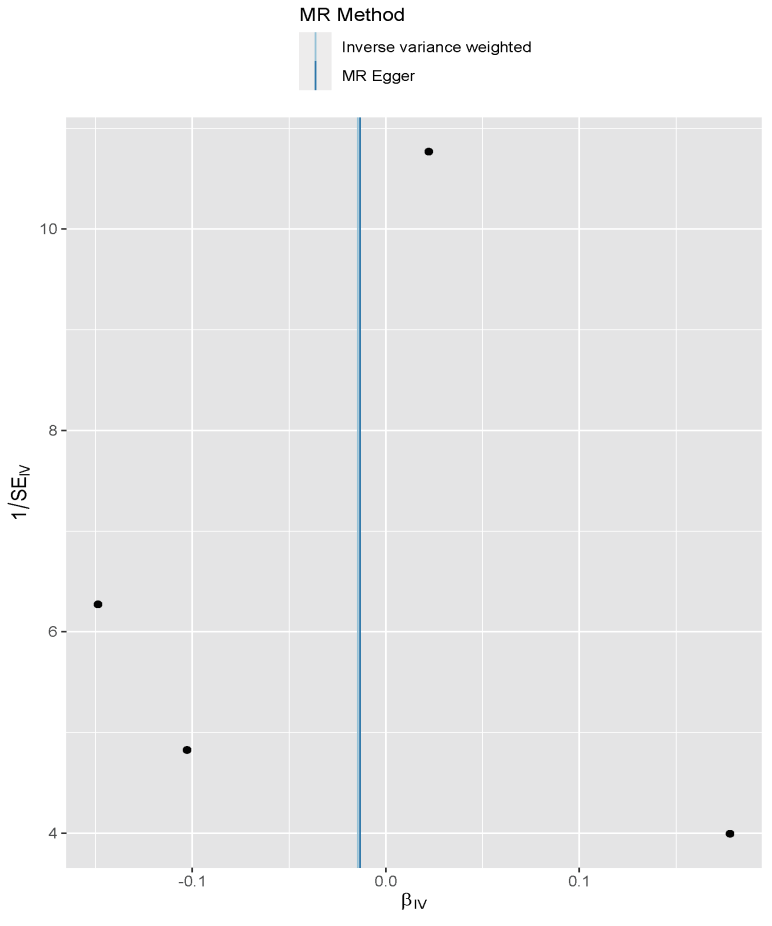

Supplementary Figure S19. Forest plot (A), Leave-one-out plot (B), scatter plot (C) and funnel plot (D) of the causal effect of NAFLD on mania.

A

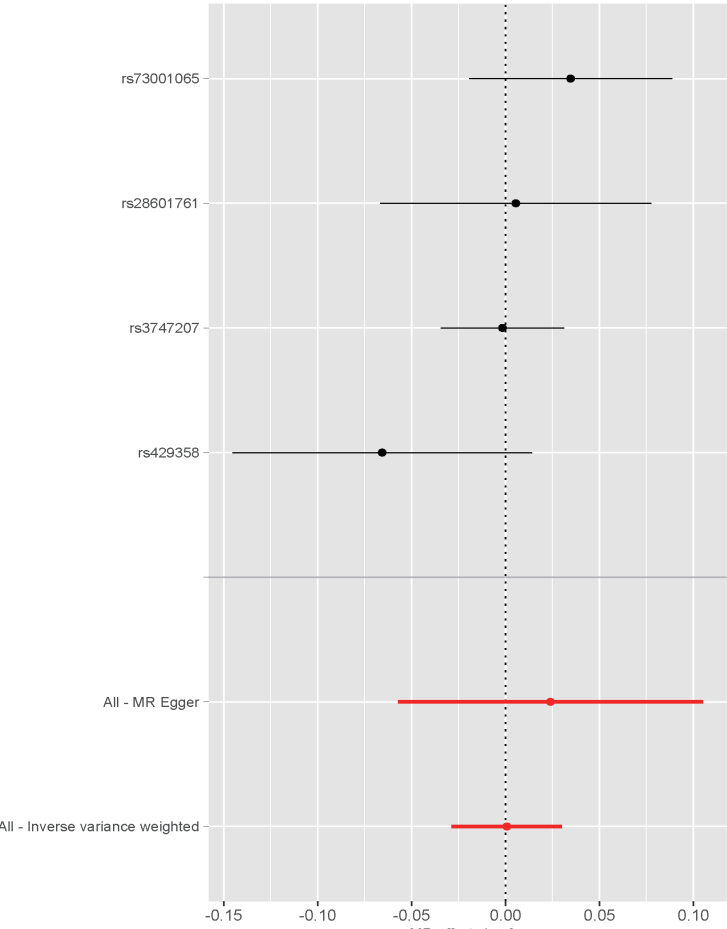

B

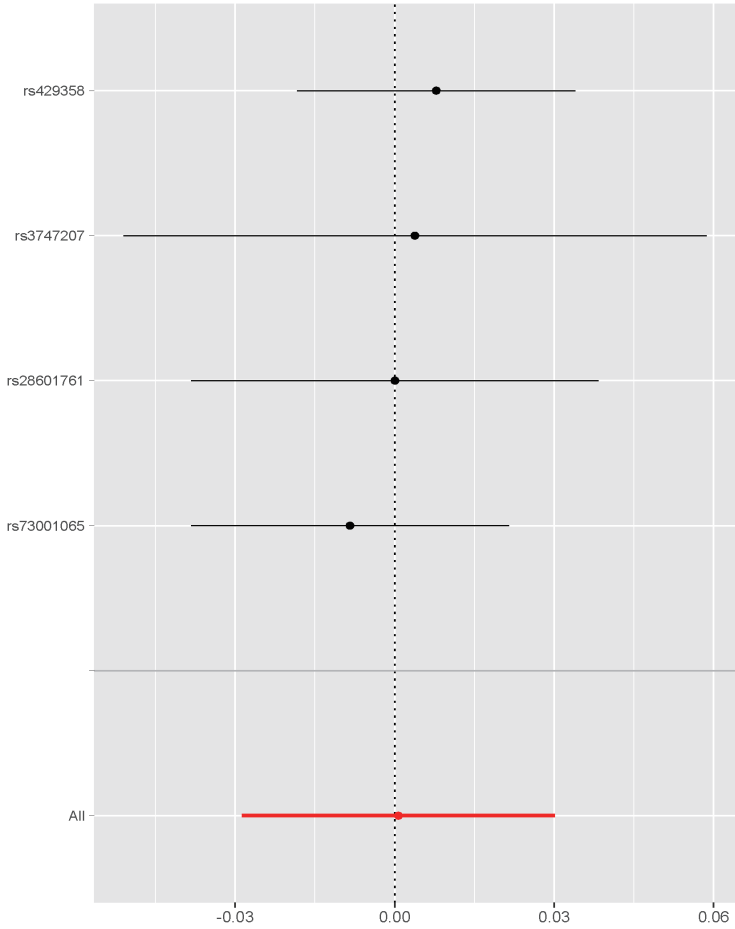

C

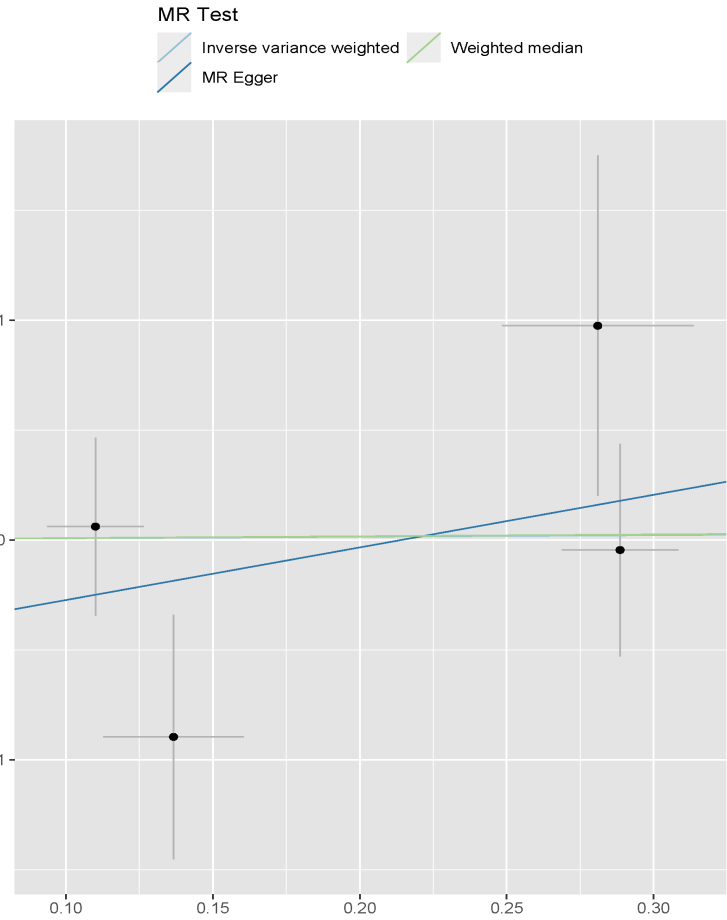

D

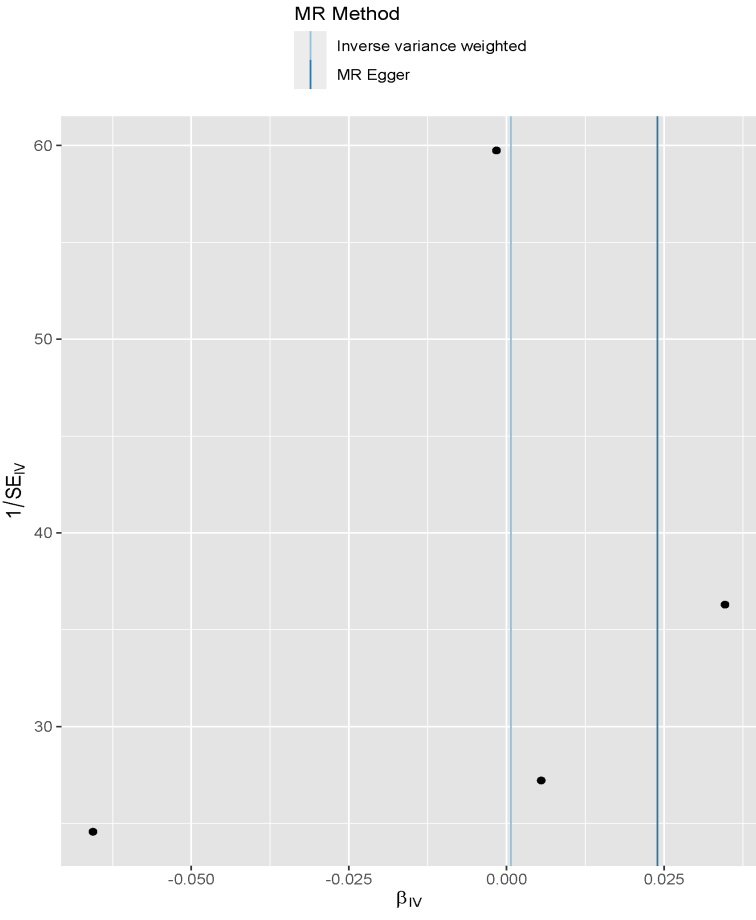

Supplementary Figure S20. Forest plot (A), Leave-one-out plot (B), scatter plot (C) and funnel plot (D) of the causal effect of NAFLD on Alzheimer's disease.

A

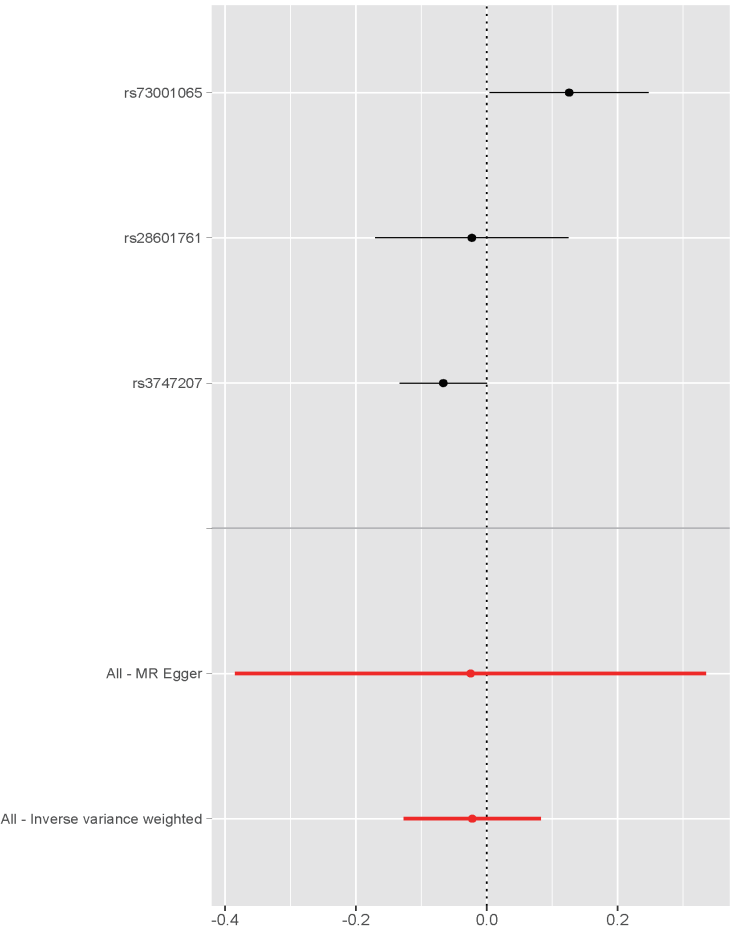

B

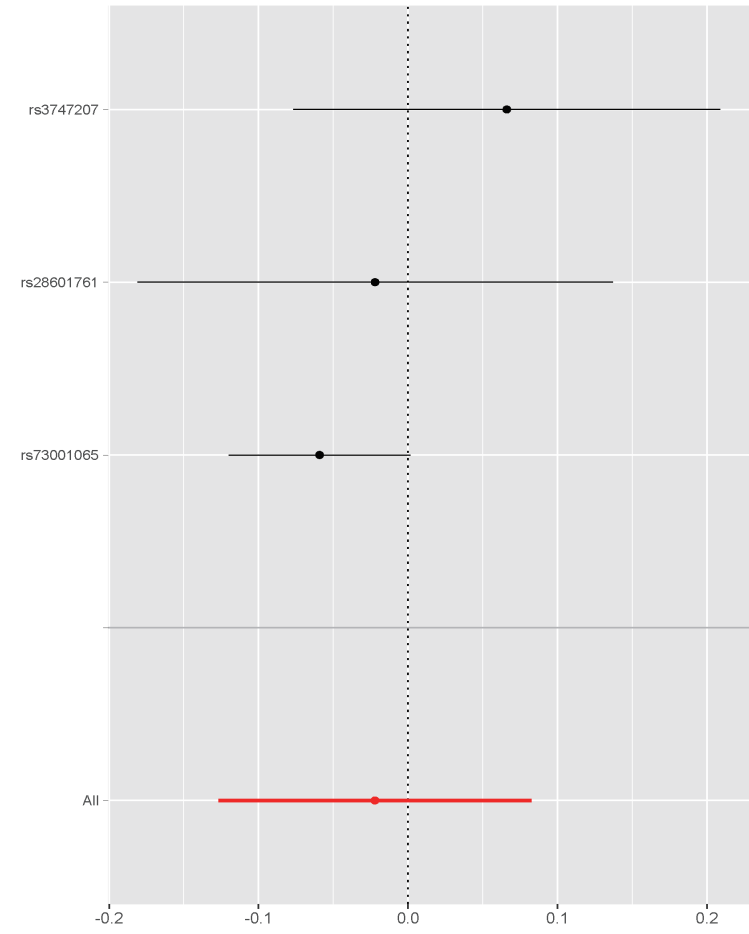

C

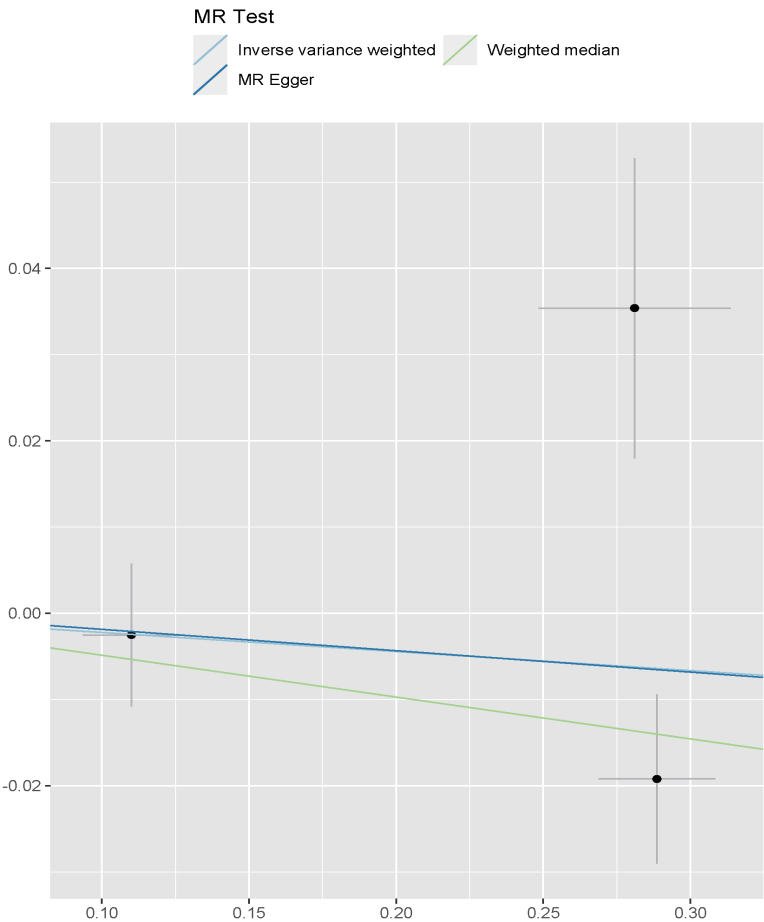

D

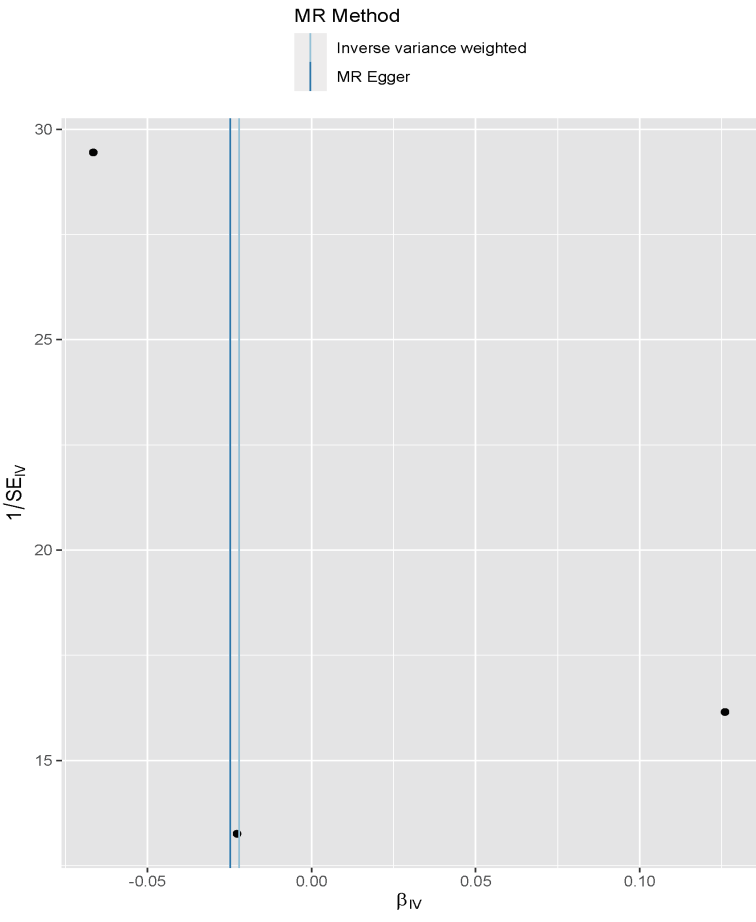



Supplementary Figure S21. Forest plot (A), Leave-one-out plot (B), scatter plot (C) and funnel plot (D) of the causal effect of NAFLD on Parkinson's disease.

A

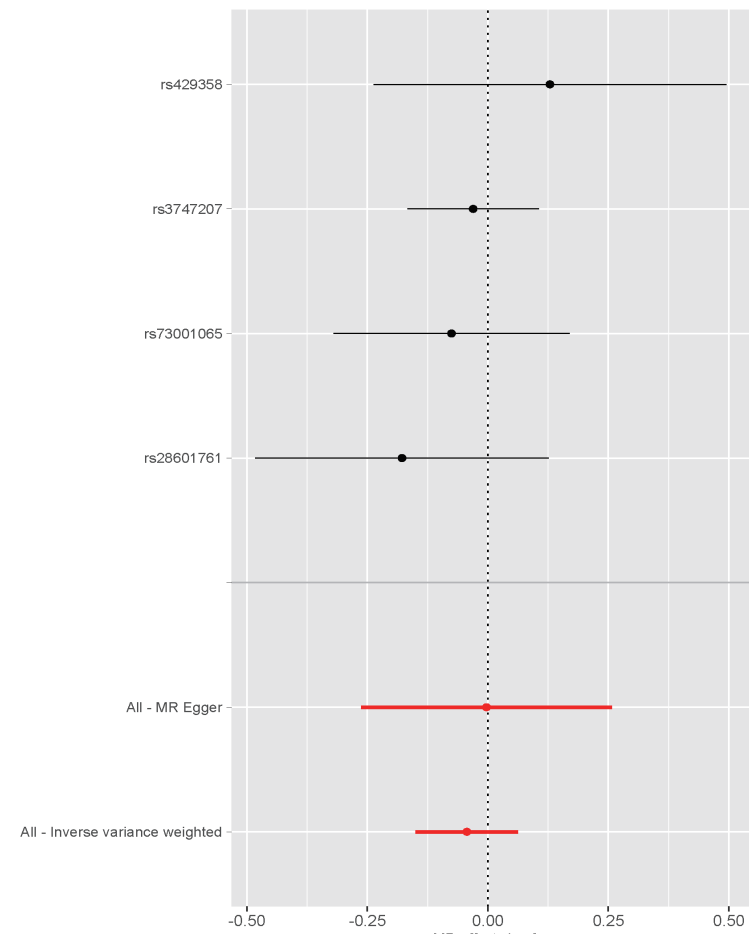

B

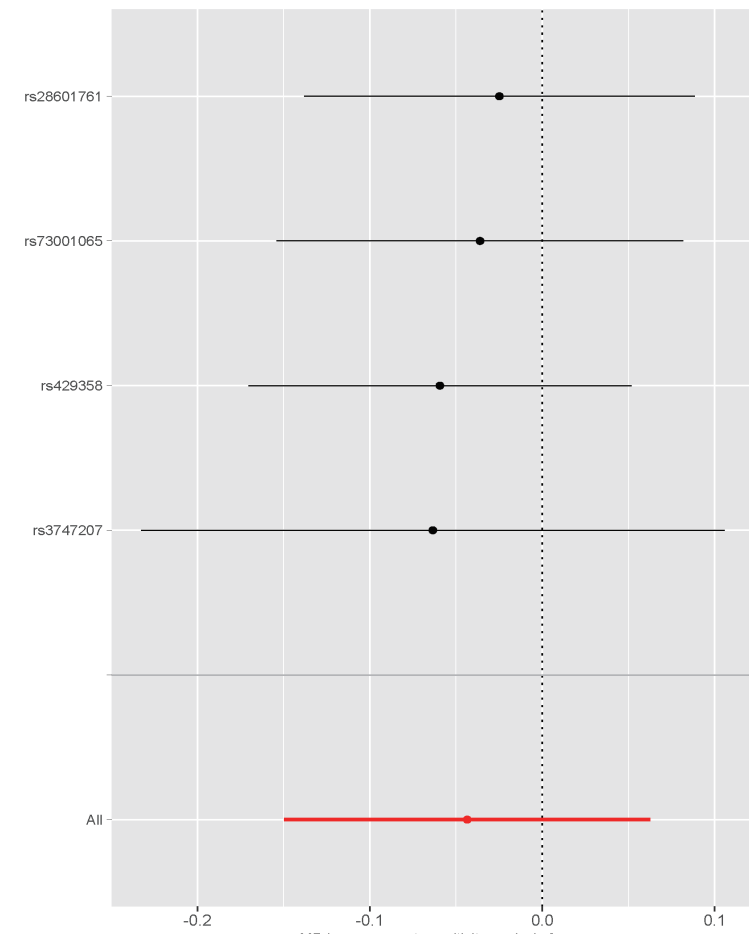

C

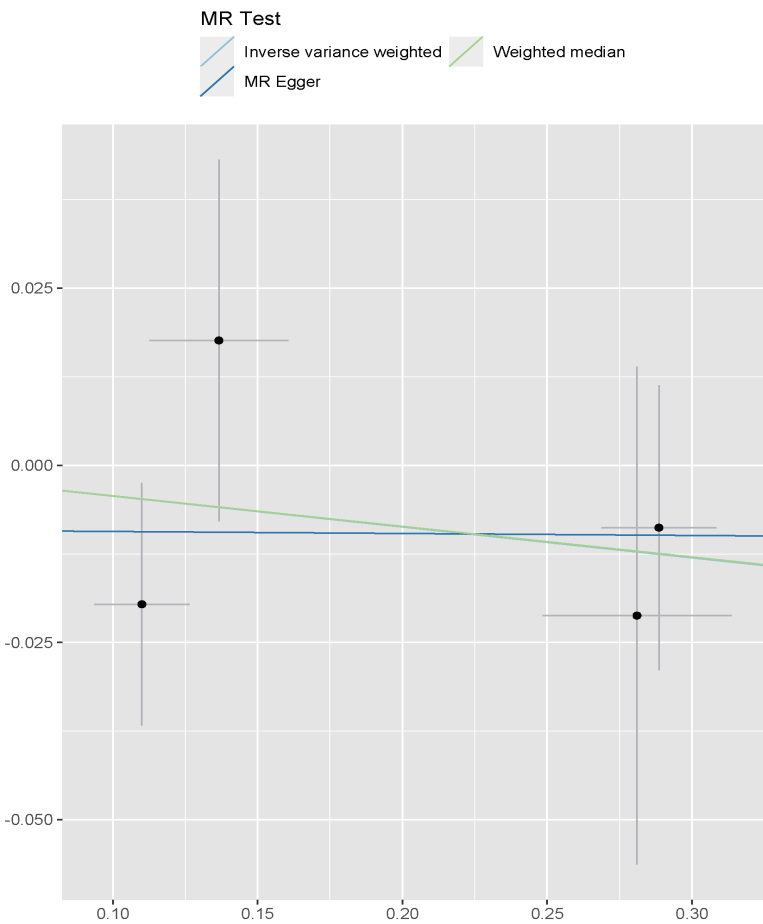

D

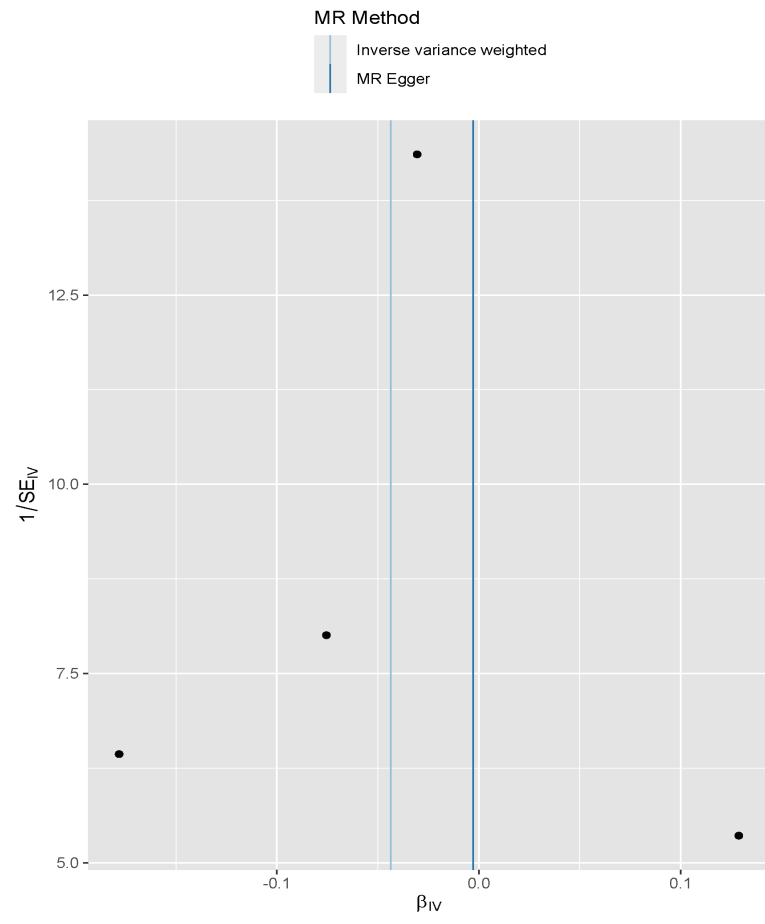

Supplementary Figure S22. Forest plot (A), Leave-one-out plot (B), scatter plot (C) and funnel plot (D) of the causal effect of NAFLD on epilepsy.

A

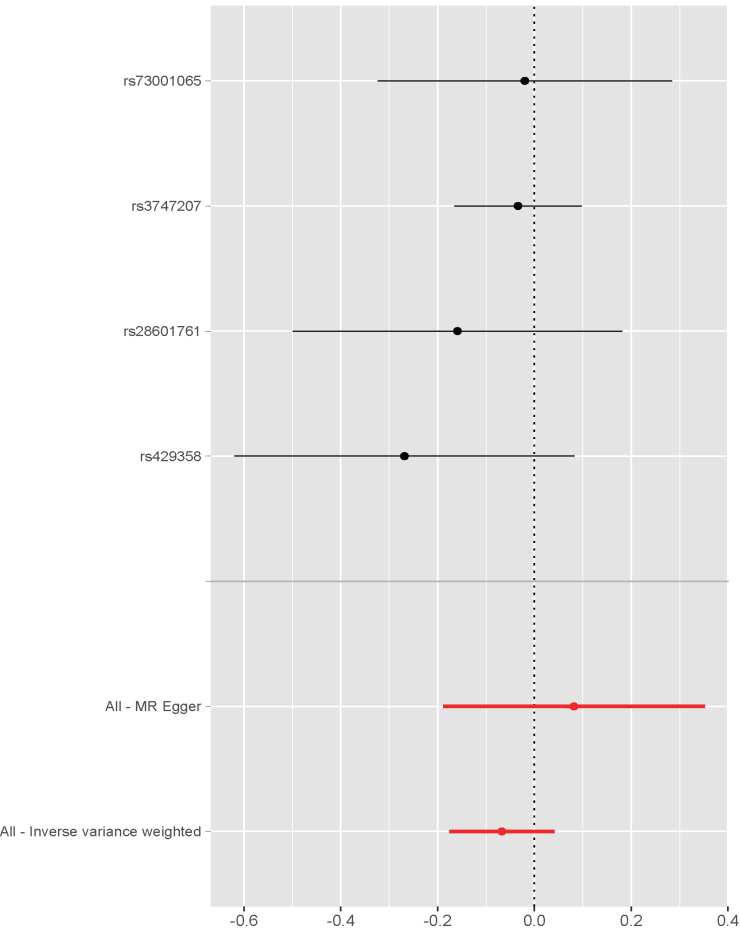

B

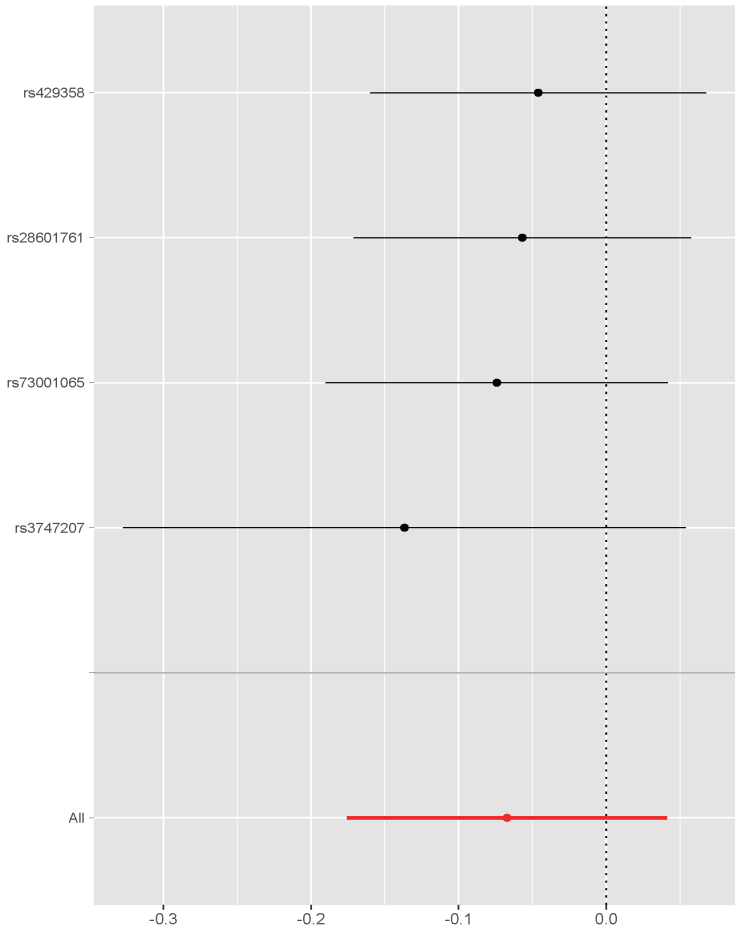

C

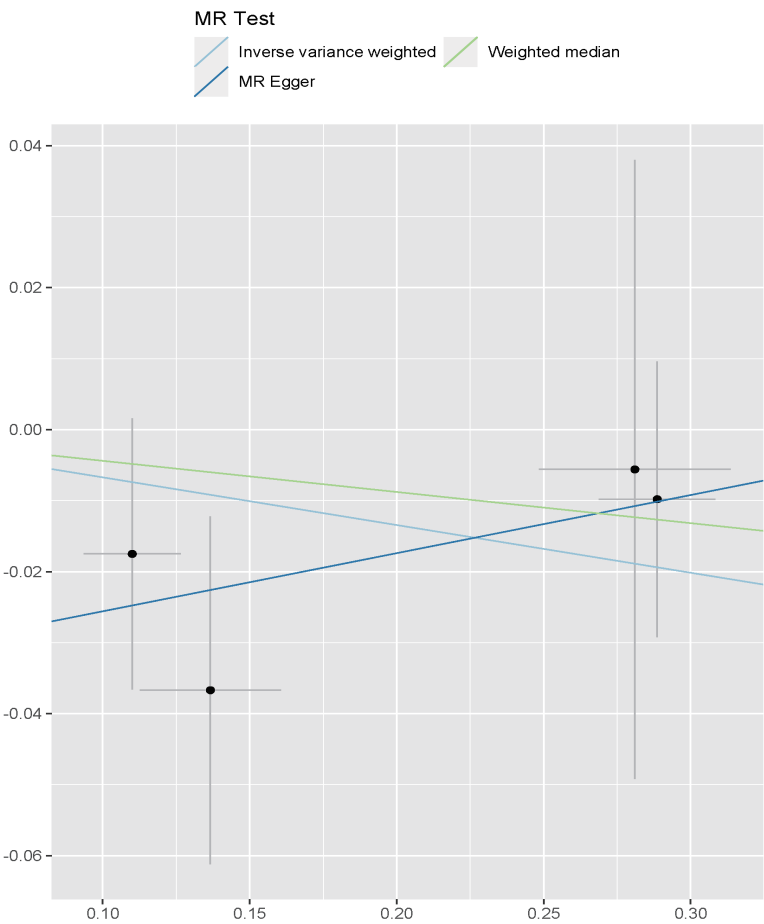

D

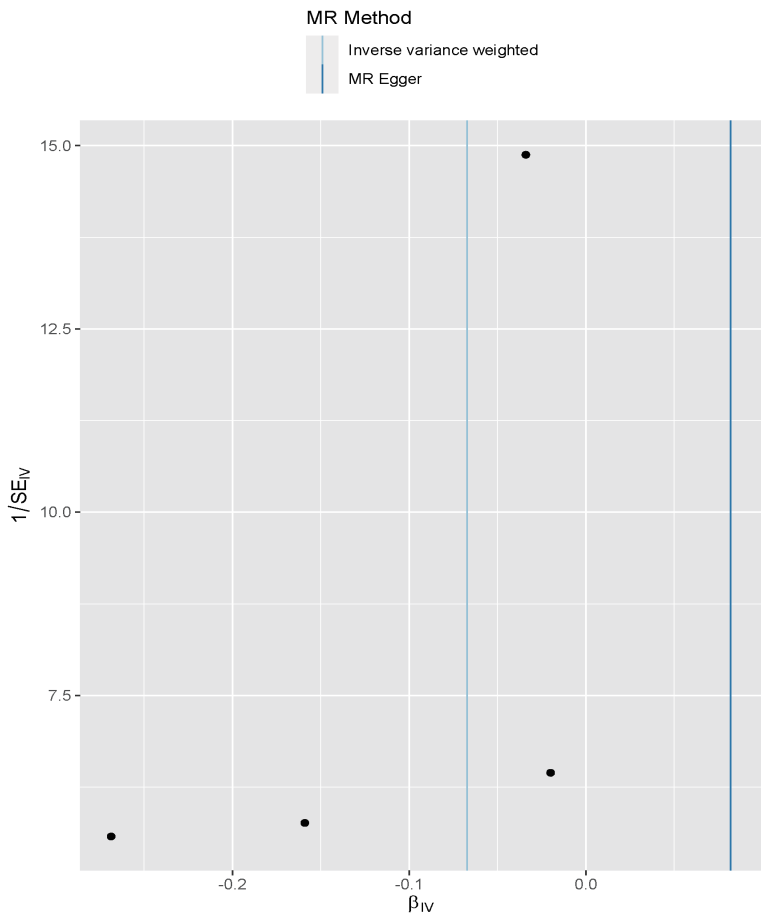

Supplementary Figure S23. Forest plot (A), Leave-one-out plot (B), scatter plot (C) and funnel plot (D) of the causal effect of NAFLD on Amyotrophic lateral sclerosis.

A

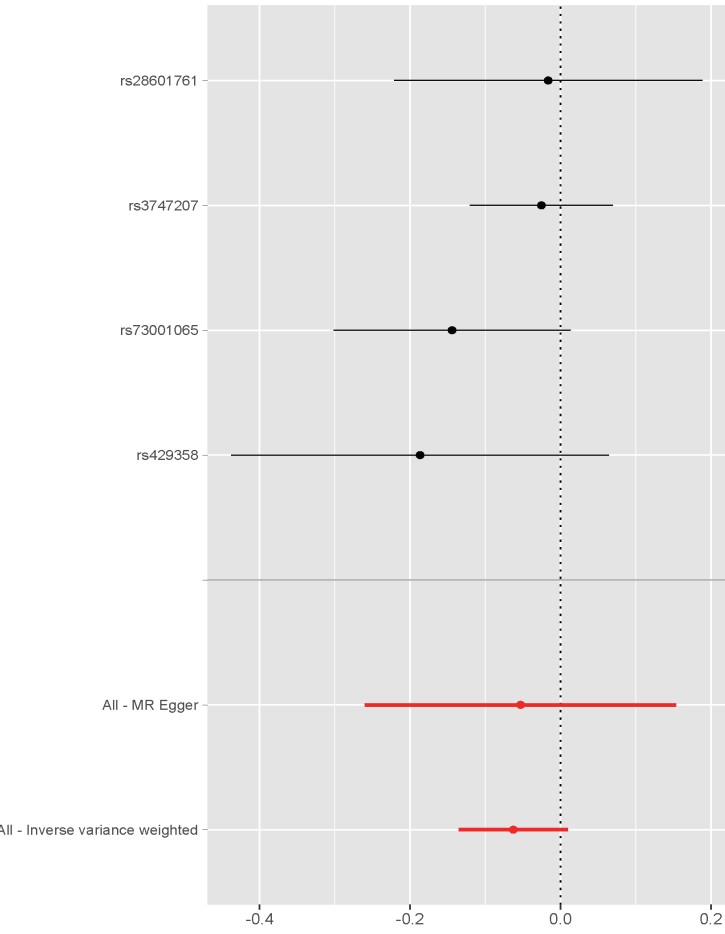

B

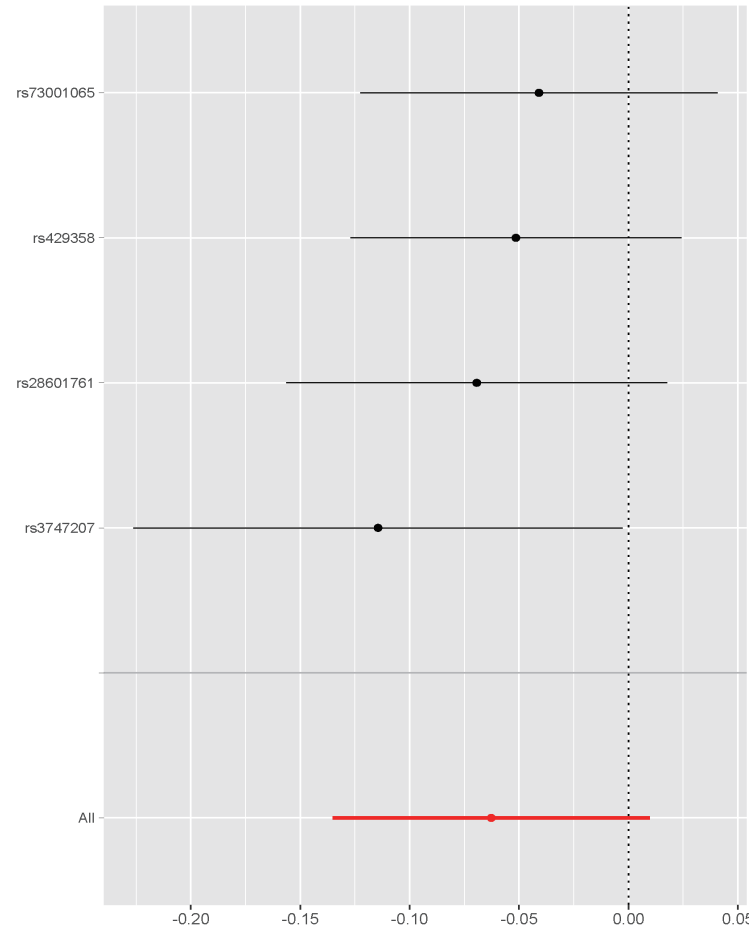

C

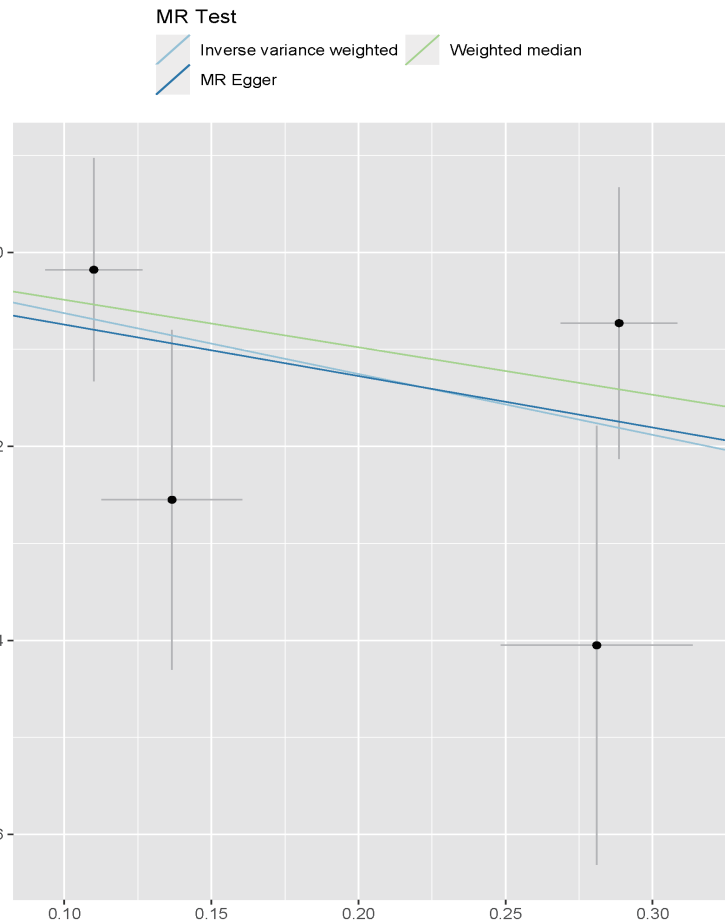

D

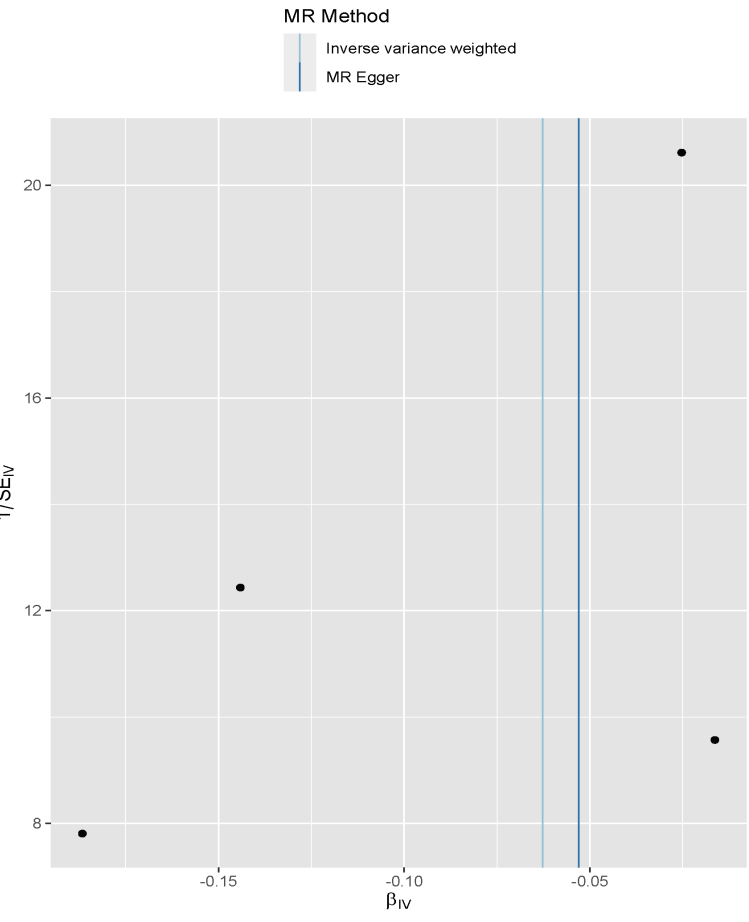

Supplementary Figure S24. Forest plot (A), Leave-one-out plot (B), scatter plot (C) and funnel plot (D) of the causal effect of NAFLD on migraine.

A

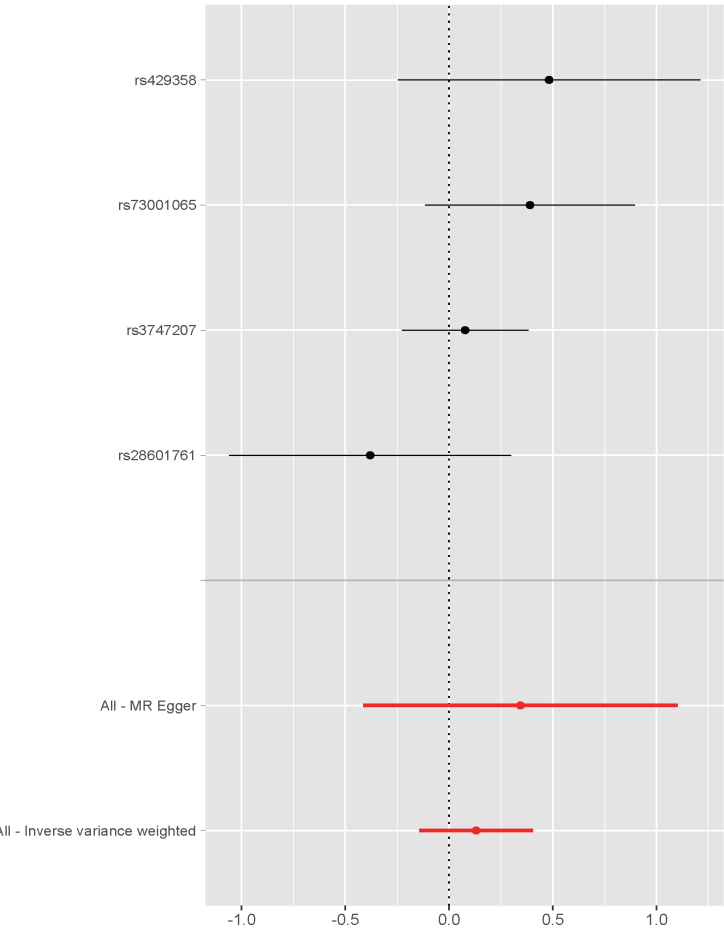

B

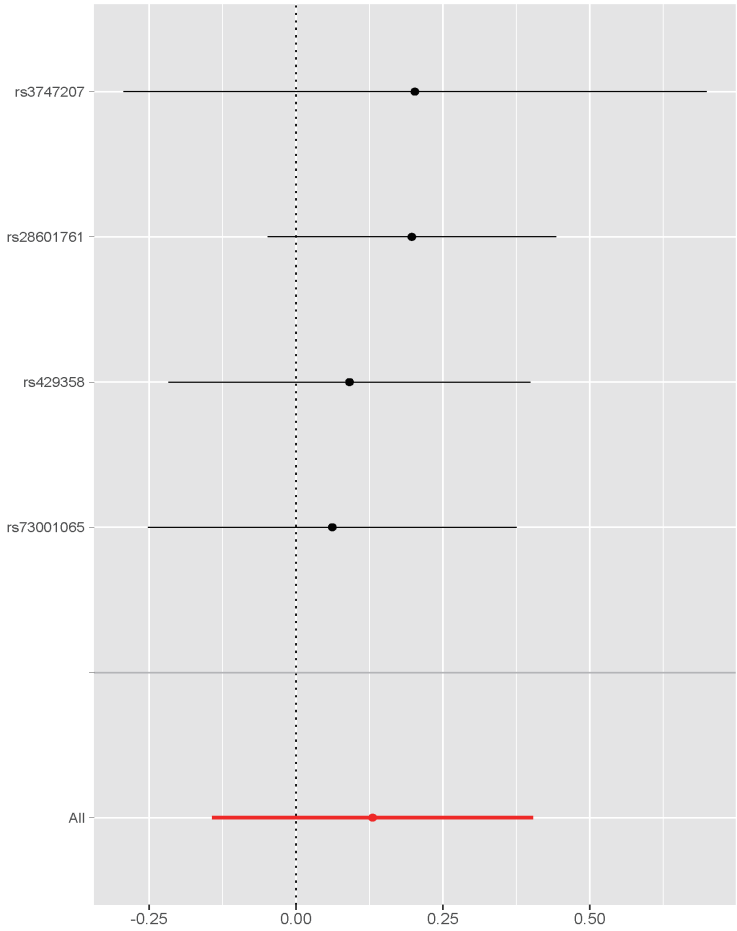

C

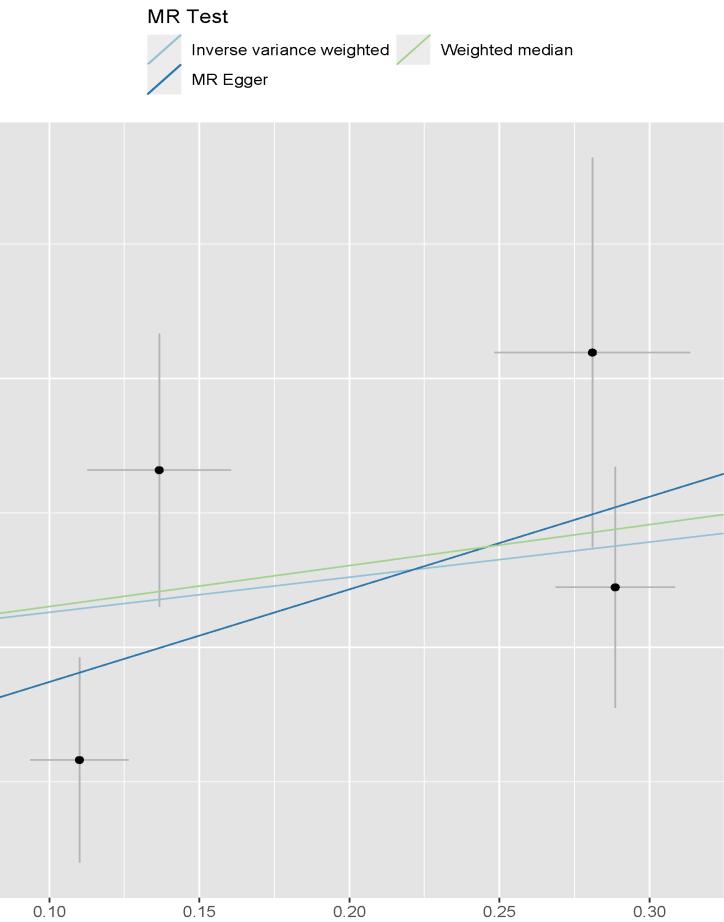

D

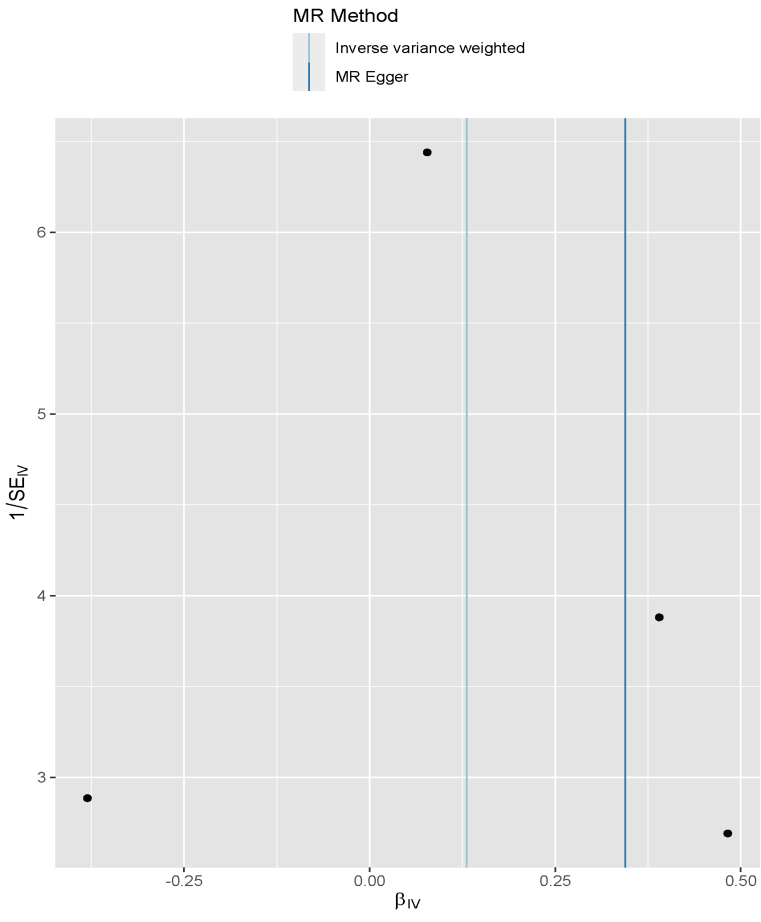

Supplementary Figure S25. Forest plot (A), Leave-one-out plot (B), scatter plot (C) and funnel plot (D) of the causal effect of anxiety on NAFLD.

A

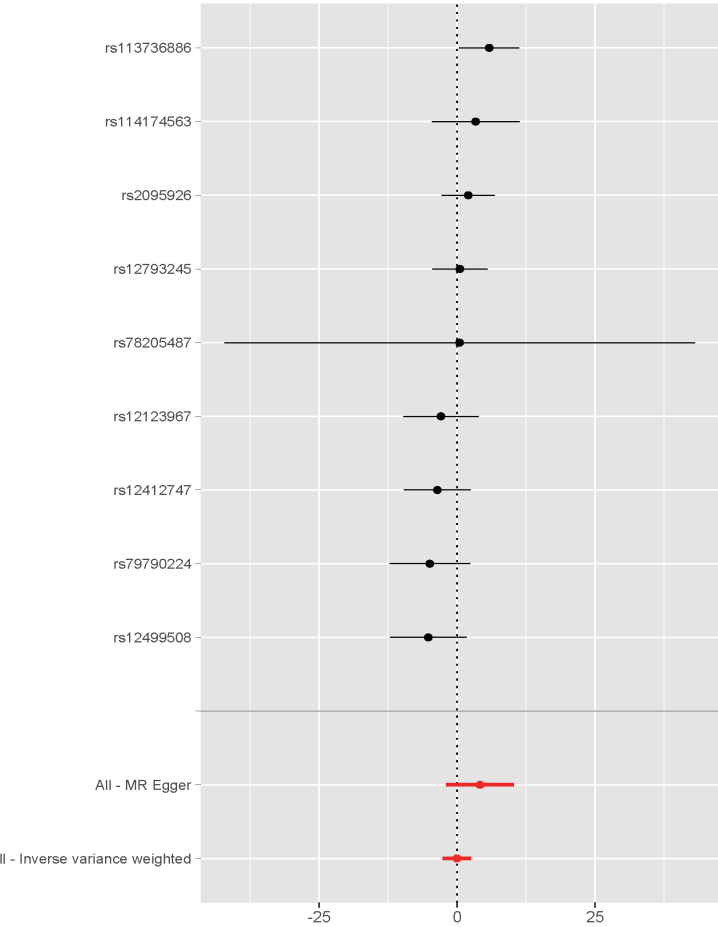

B

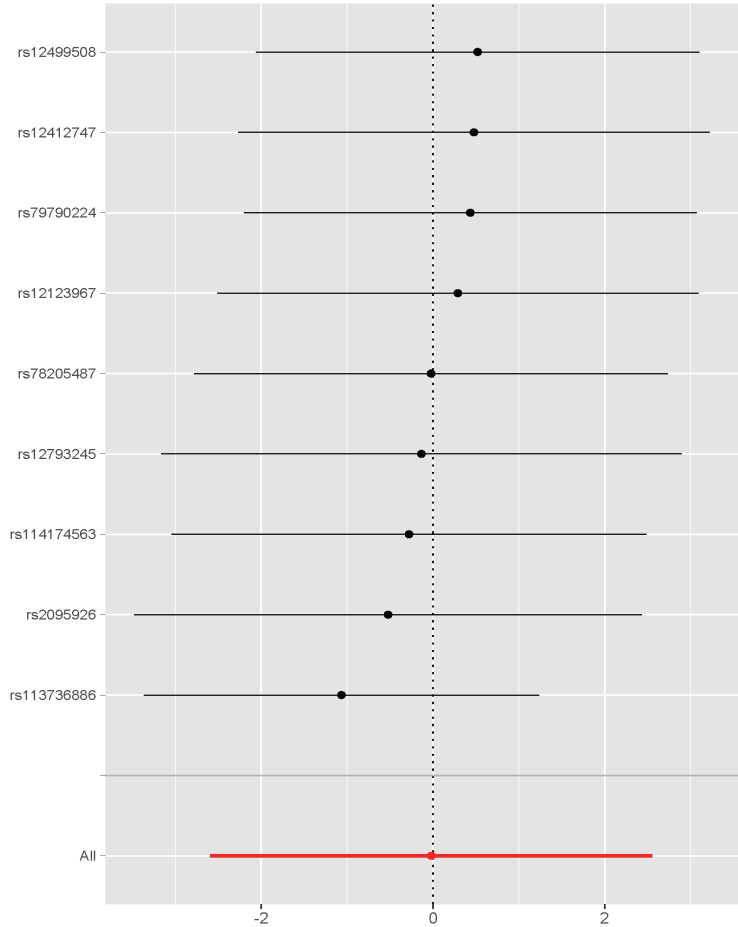

C

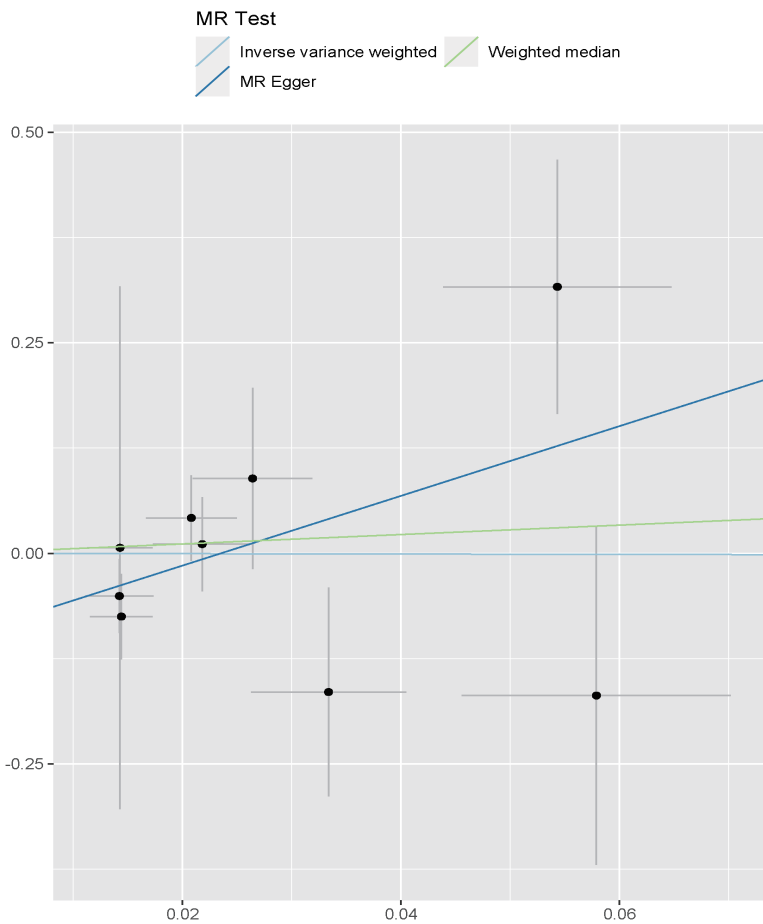

D

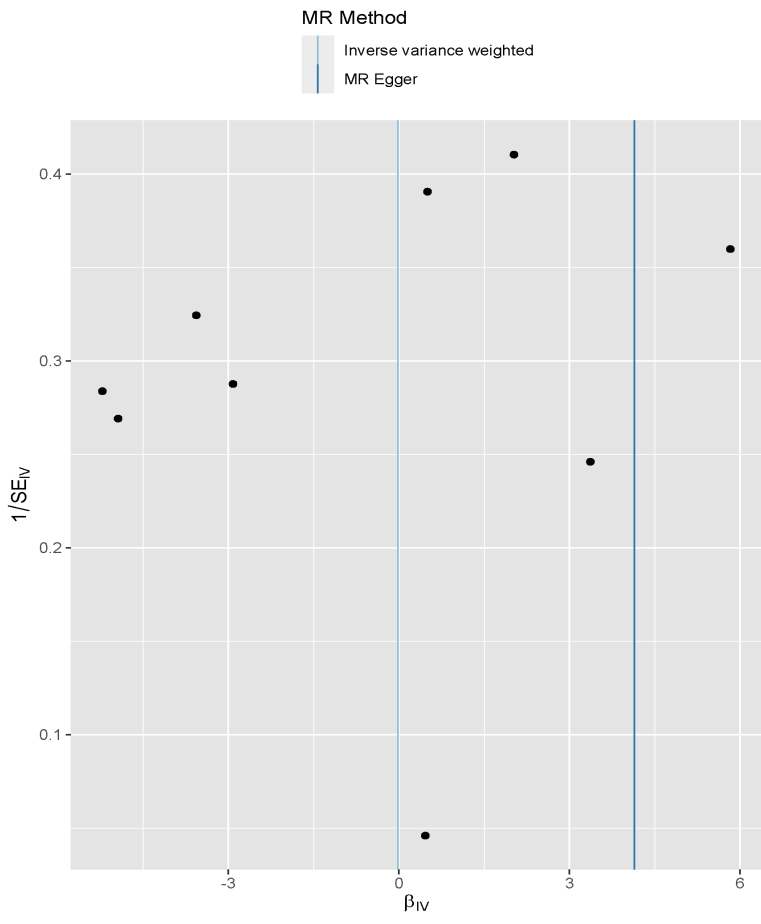

Supplementary Figure S26. Forest plot (A), Leave-one-out plot (B), scatter plot (C) and funnel plot (D) of the causal effect of schizophrenia on NAFLD.

A

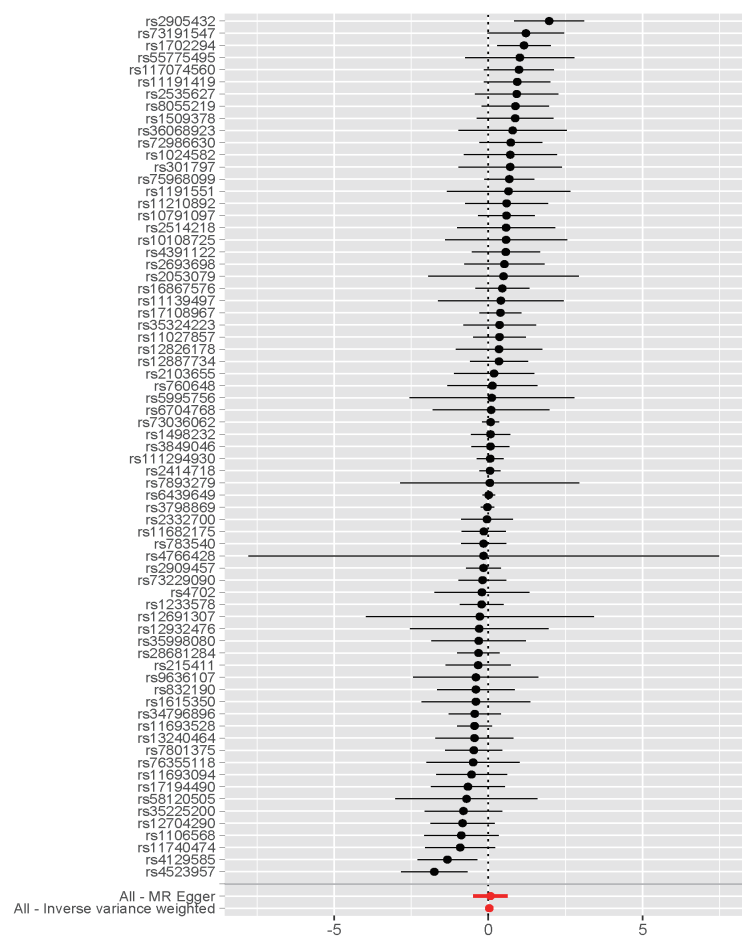

B

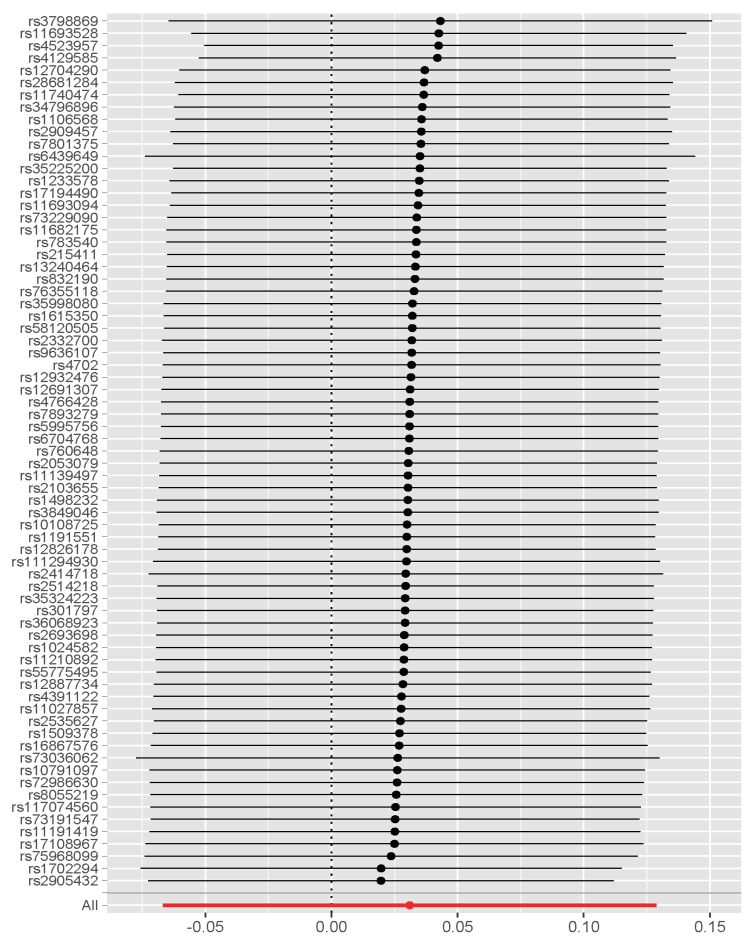

C

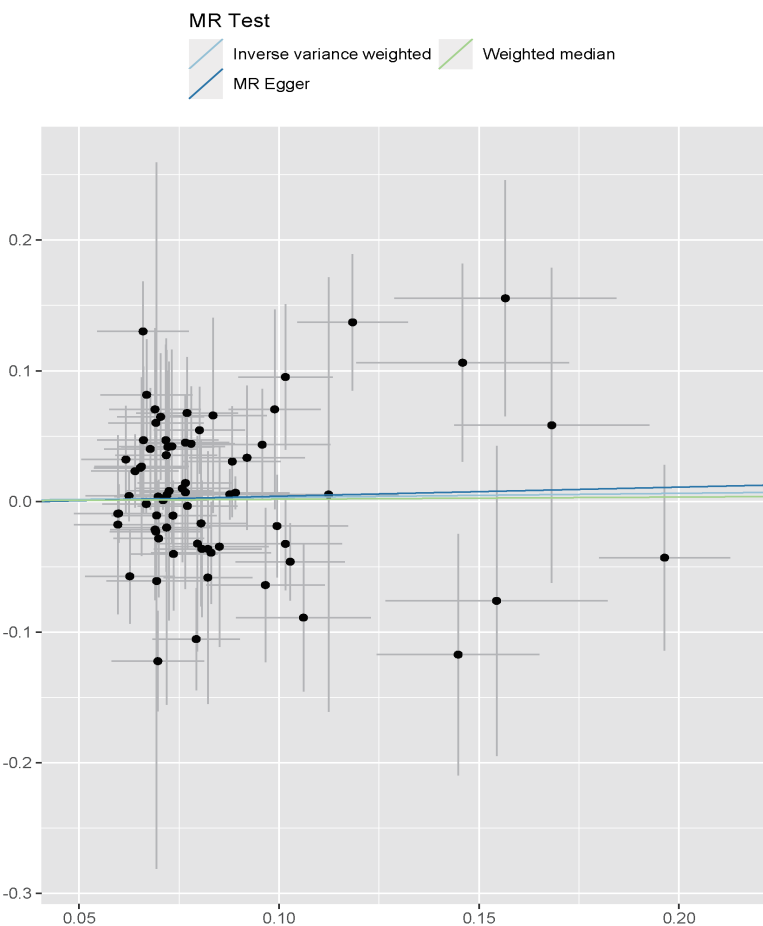

D

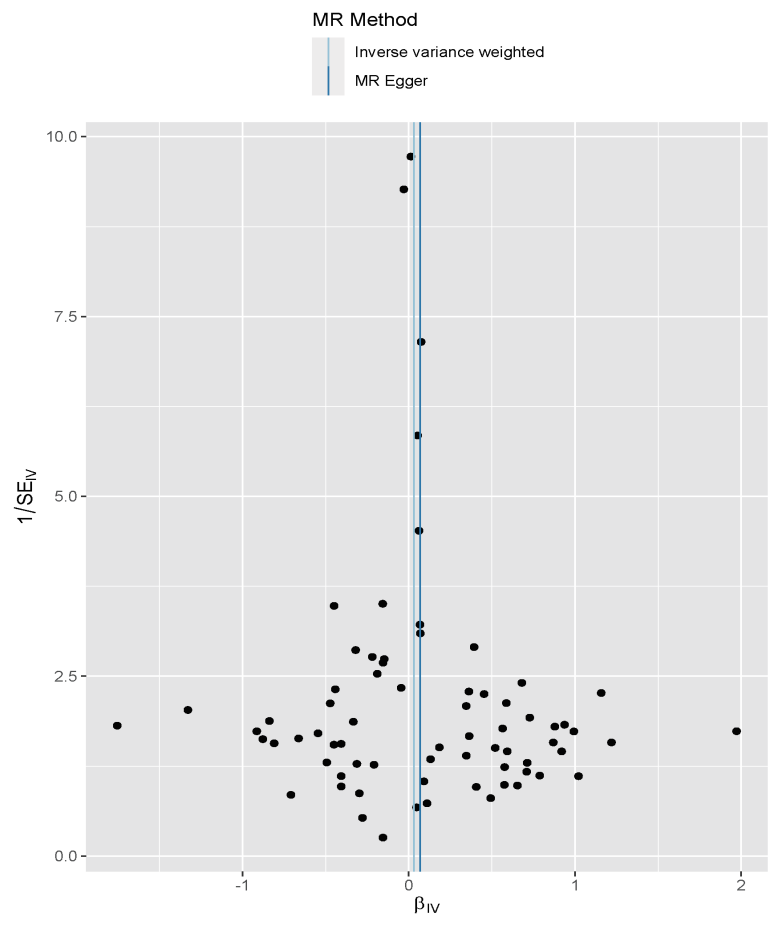

Supplementary Figure S27. Forest plot (A), Leave-one-out plot (B), scatter plot (C) and funnel plot (D) of the causal effect of Post-traumatic stress disorder on NAFLD.

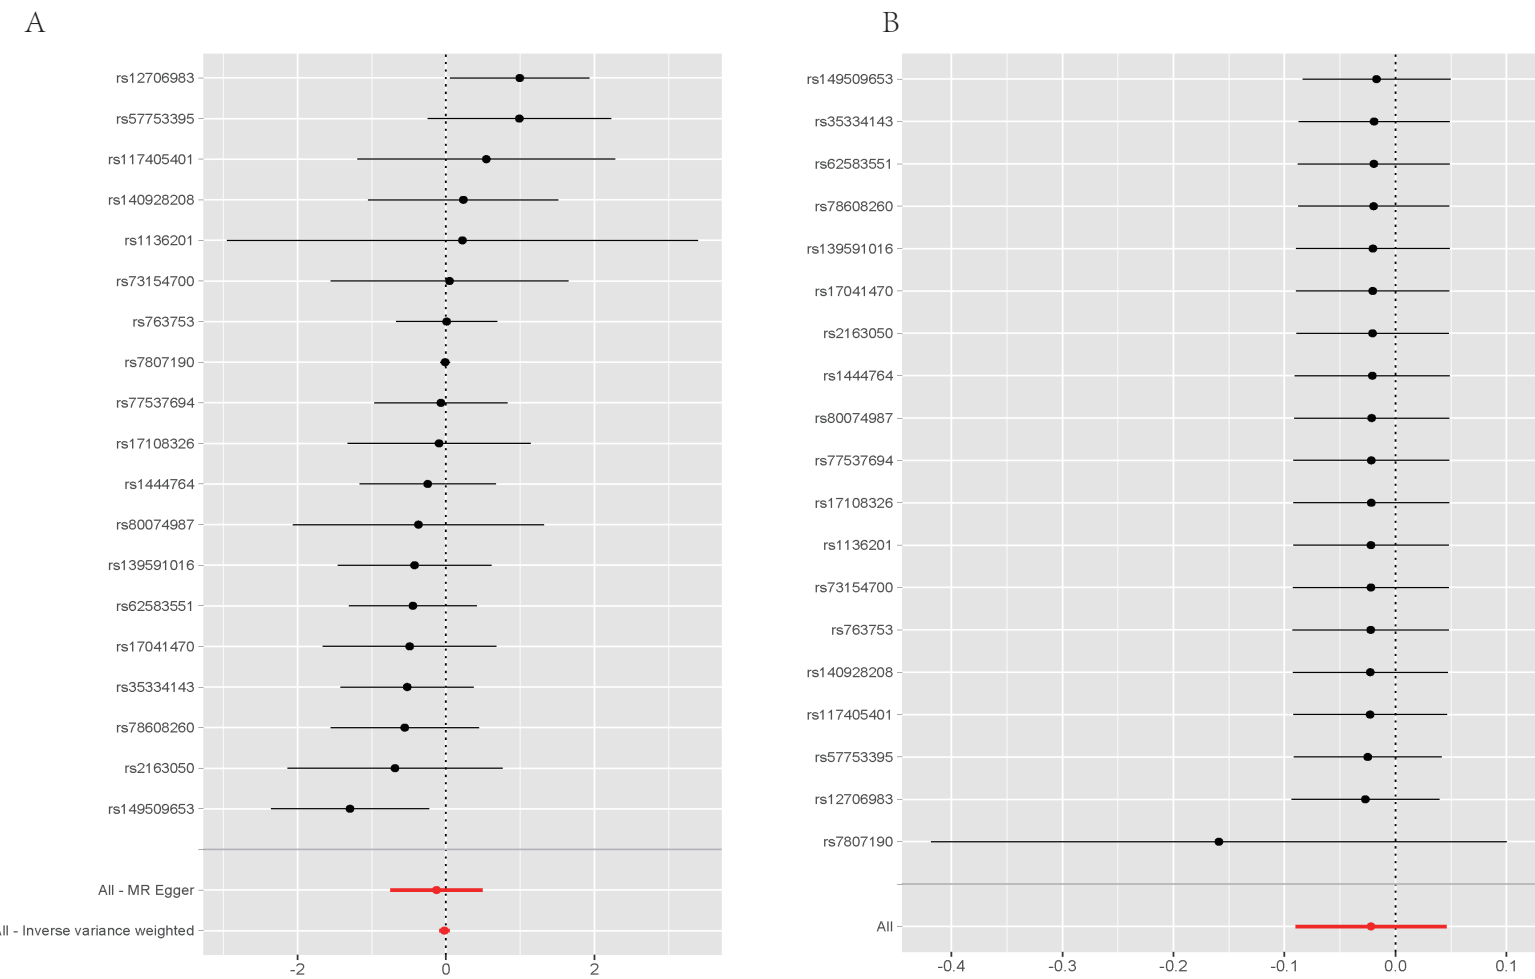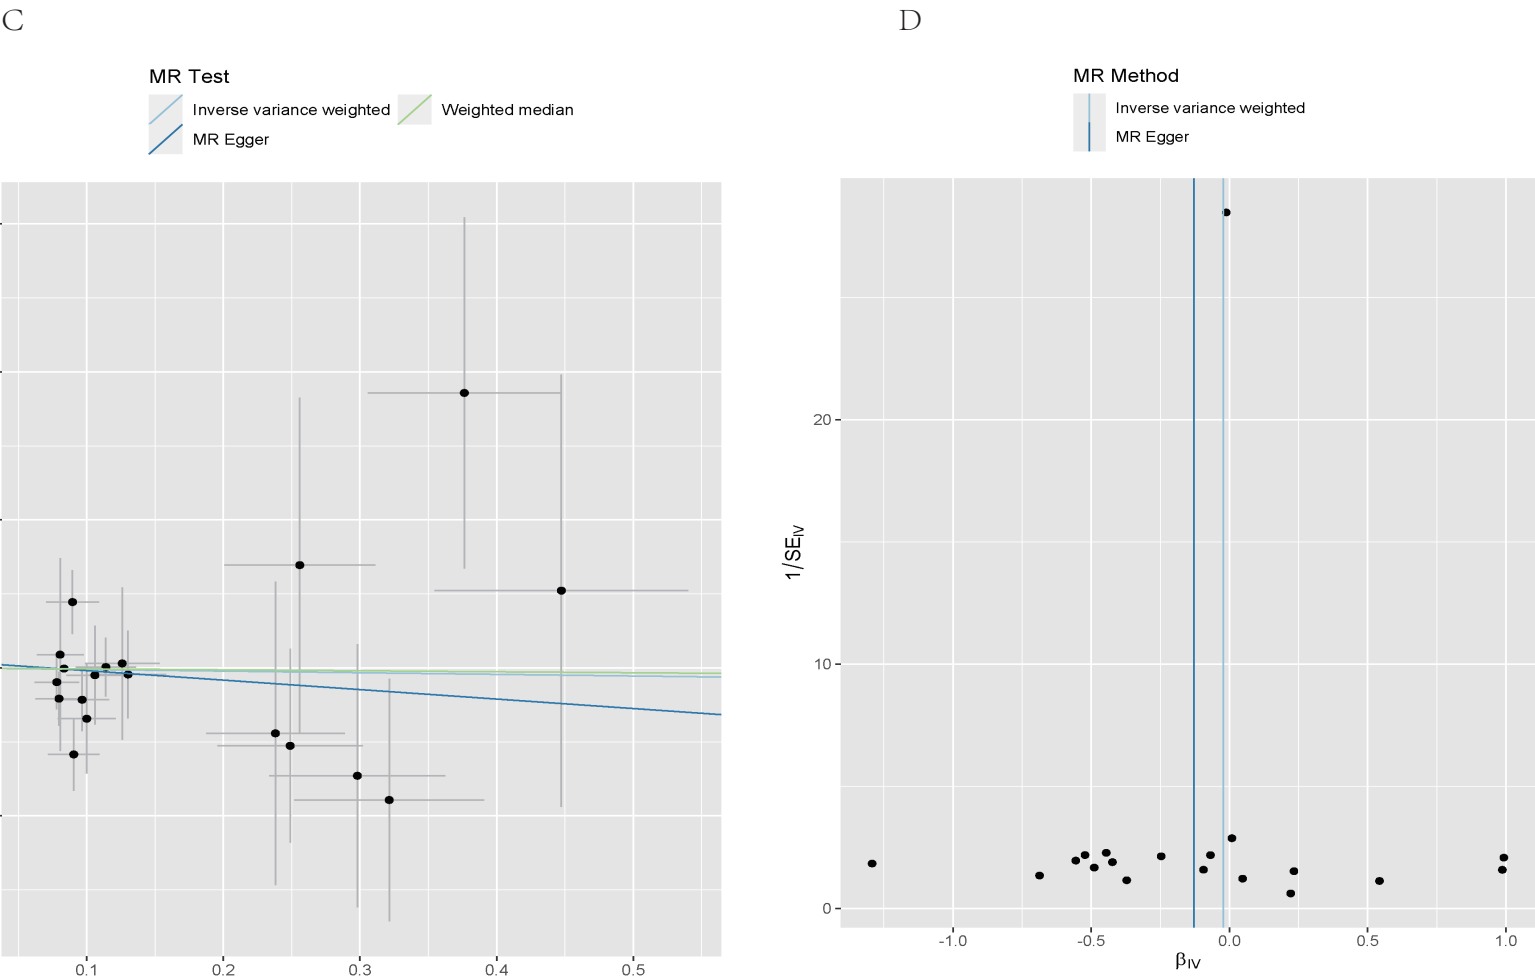

Supplementary Figure S28. Forest plot (A), Leave-one-out plot (B), scatter plot (C) and funnel plot (D) of the causal effect of Obsessive-compulsive disorder on NAFLD.

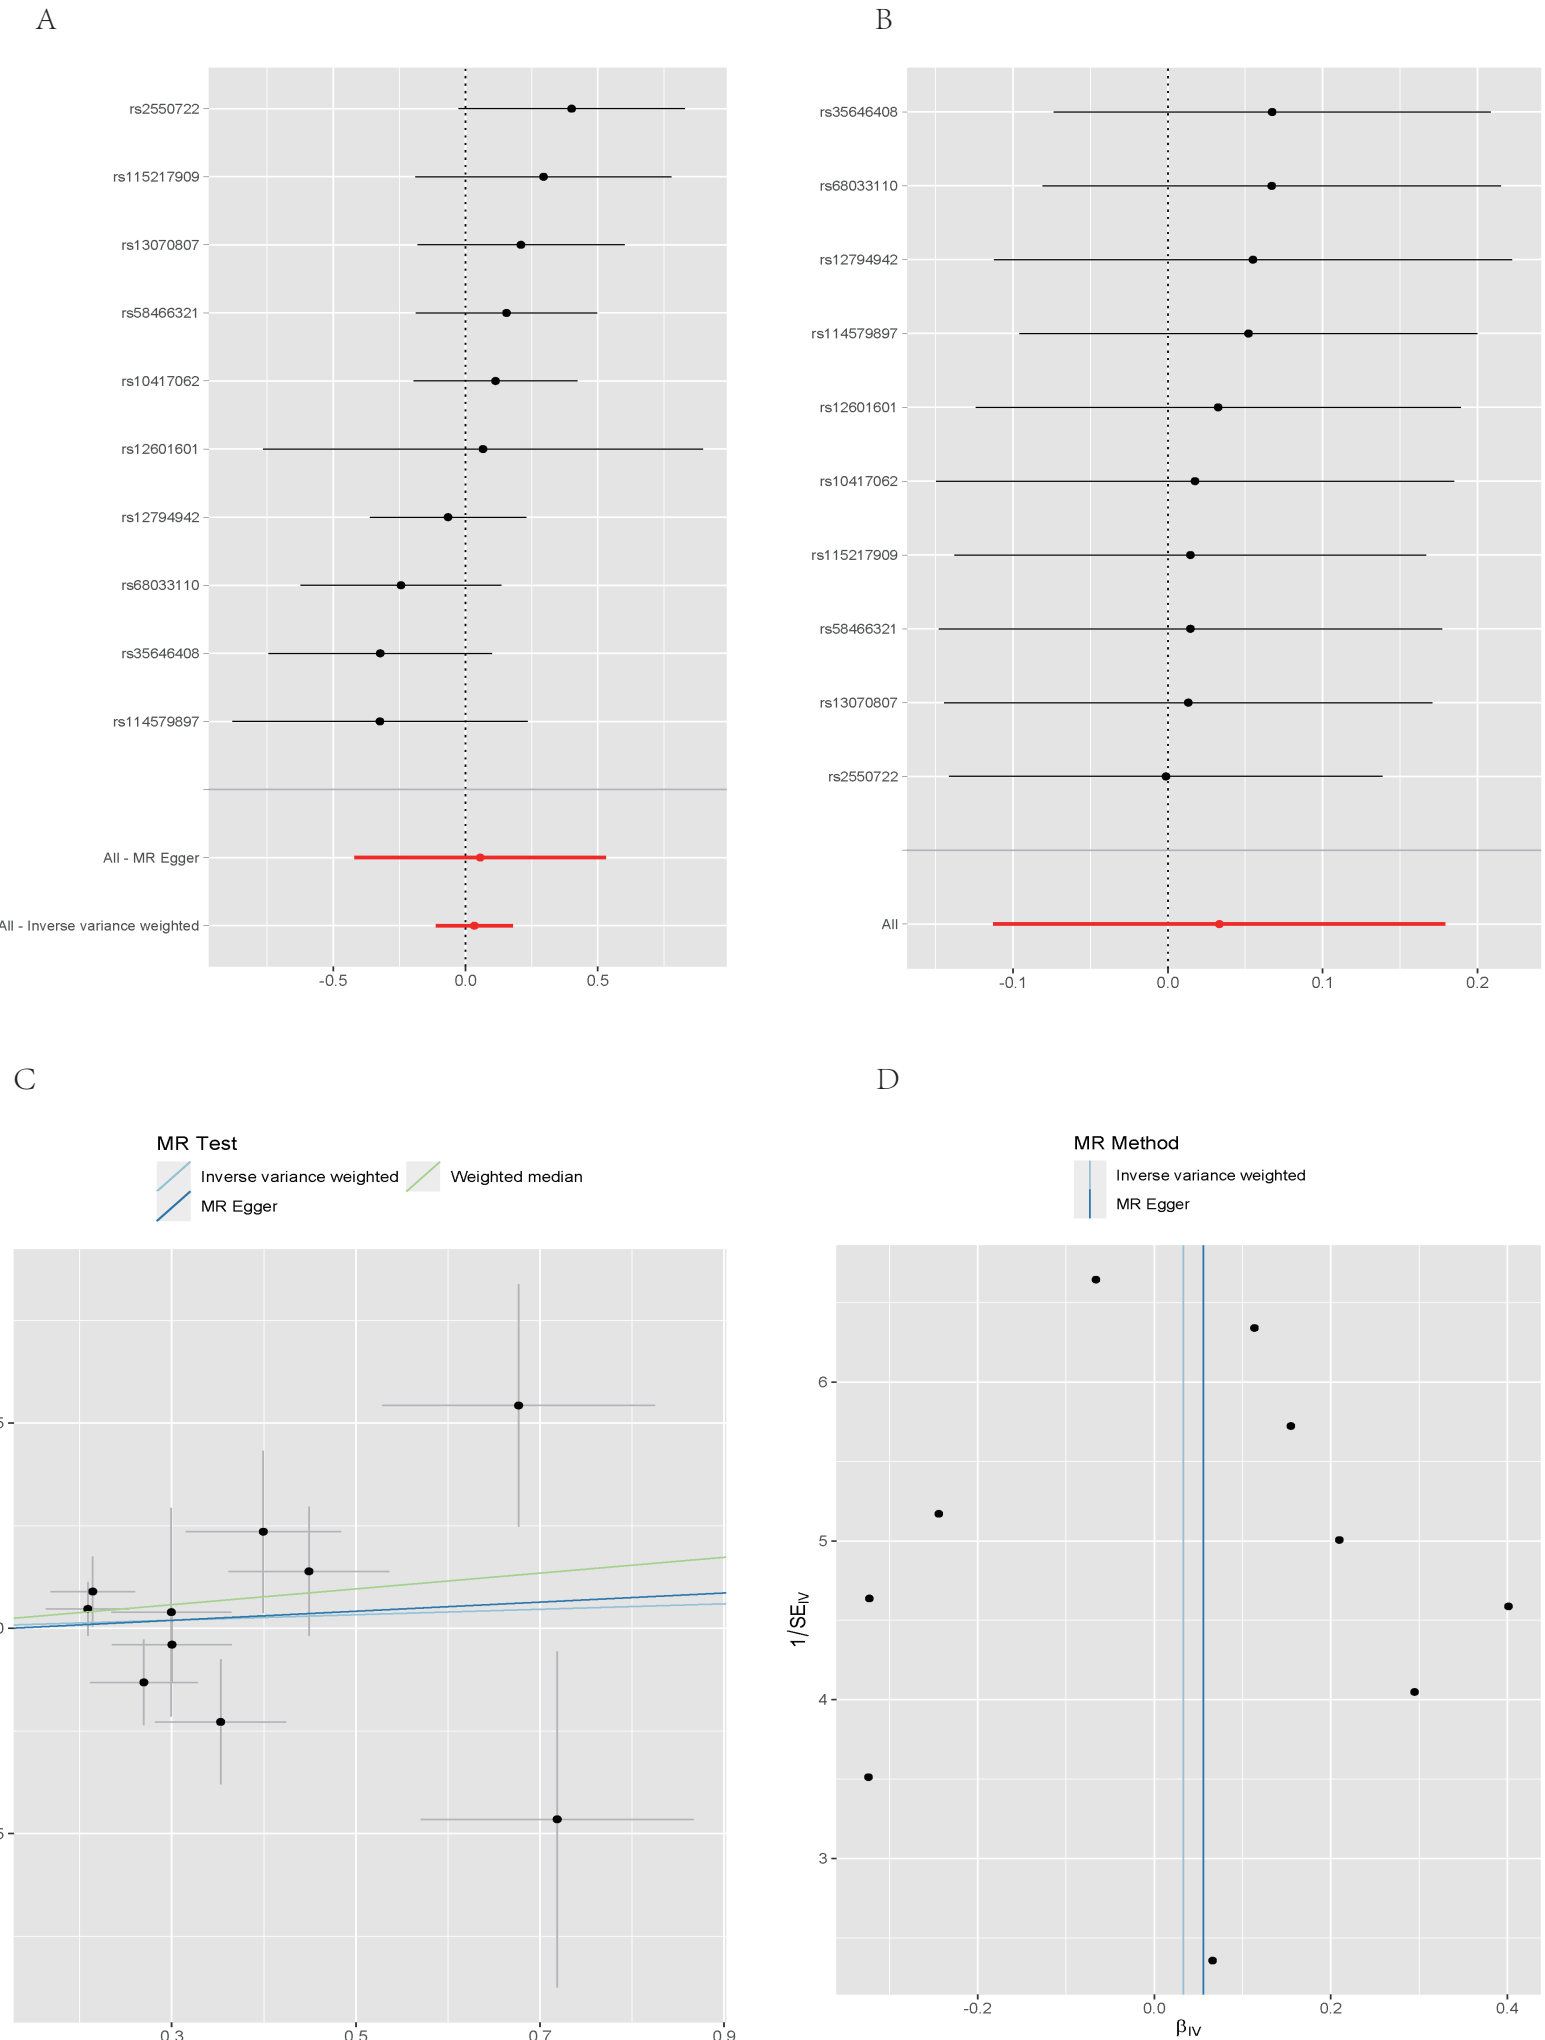



Supplementary Figure S29. Forest plot (A), Leave-one-out plot (B), scatter plot (C) and funnel plot (D) of the causal effect of Major Depressive Disorder on NAFLD.

A

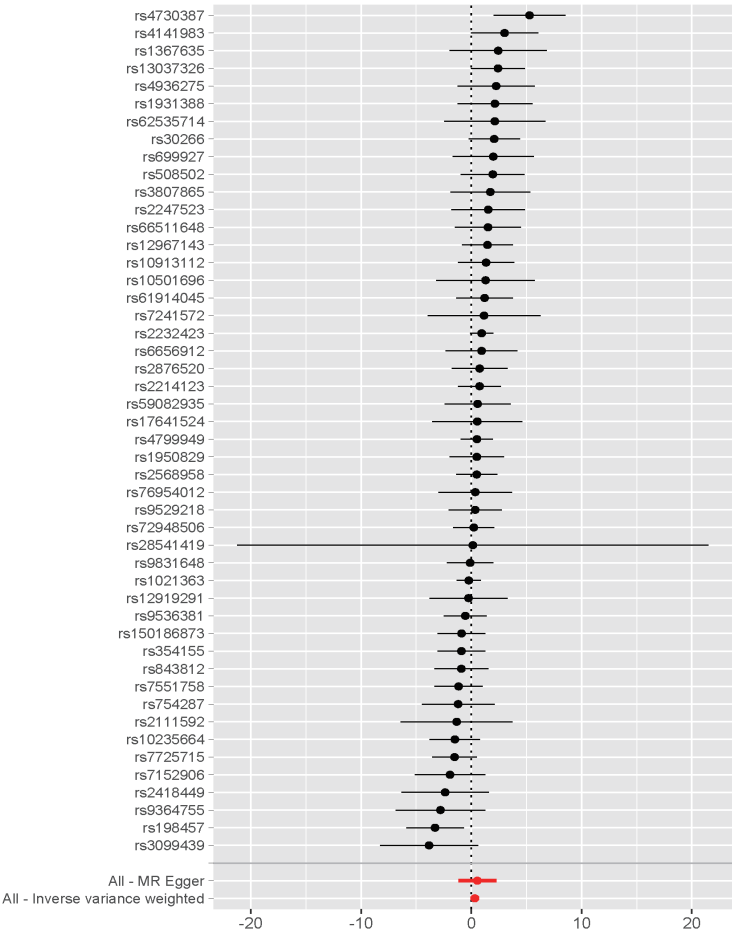

B

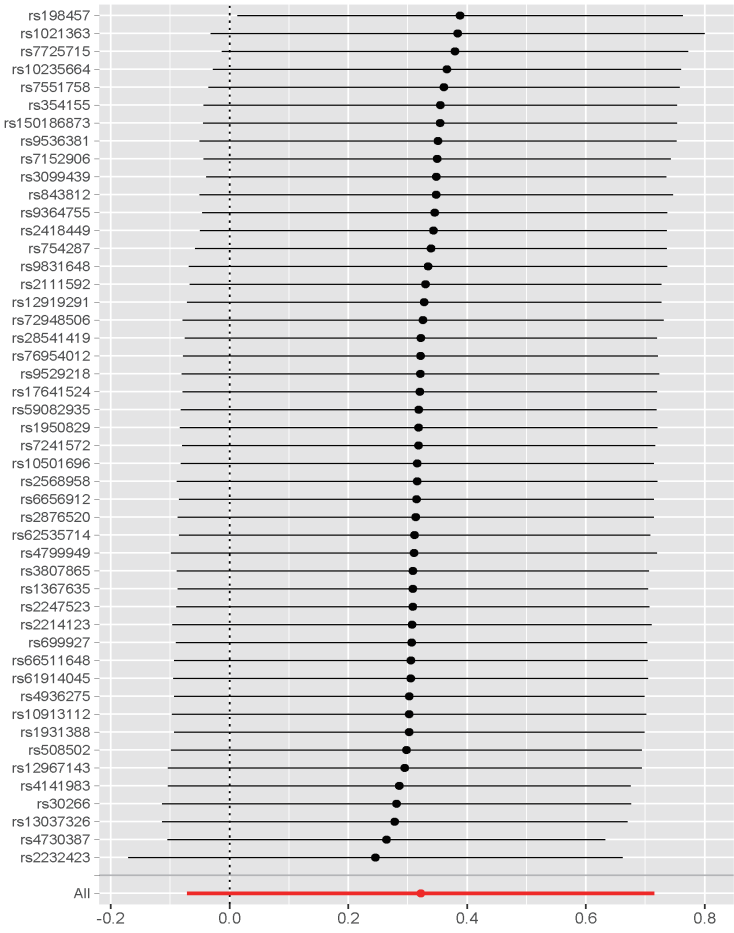

C

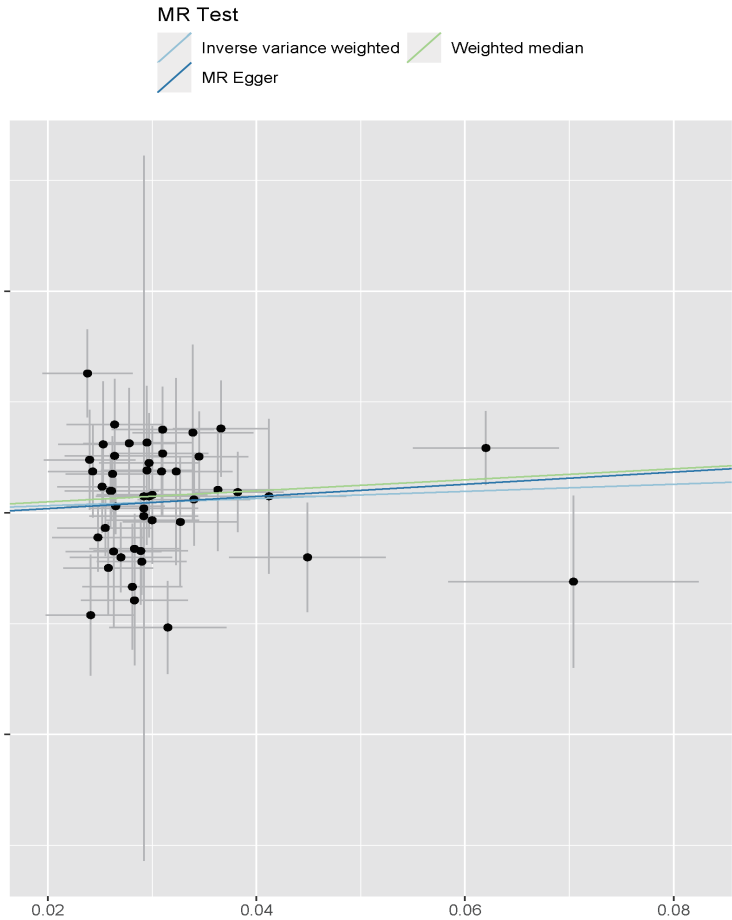

D

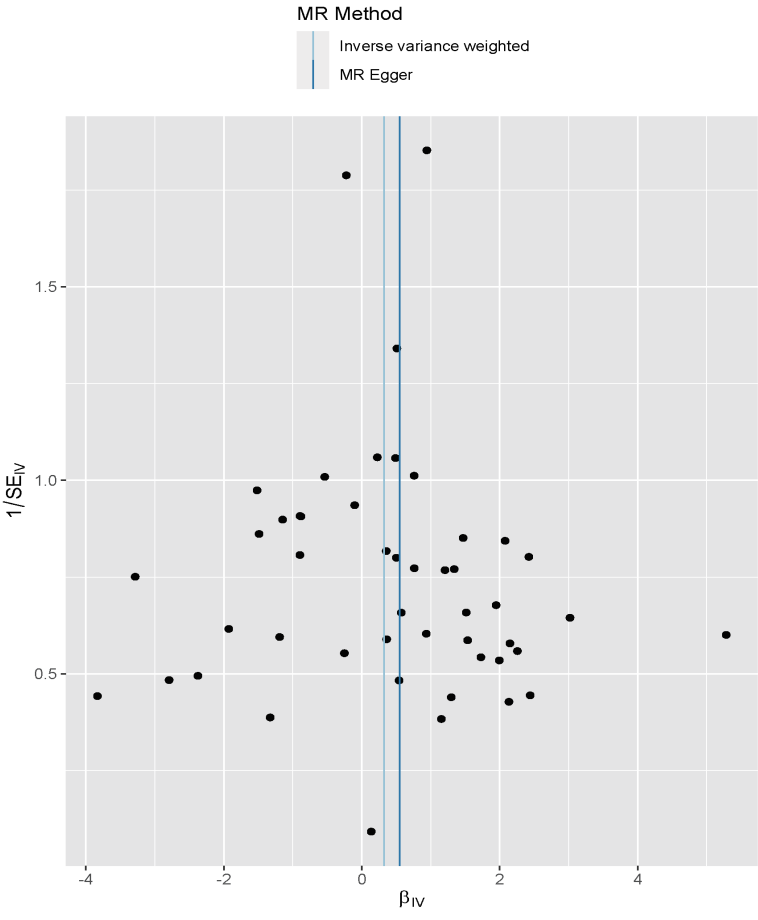

Supplementary Figure S30. Forest plot (A), Leave-one-out plot (B), scatter plot (C) and funnel plot (D) of the causal effect of Bipolar disorder on NAFLD.

A

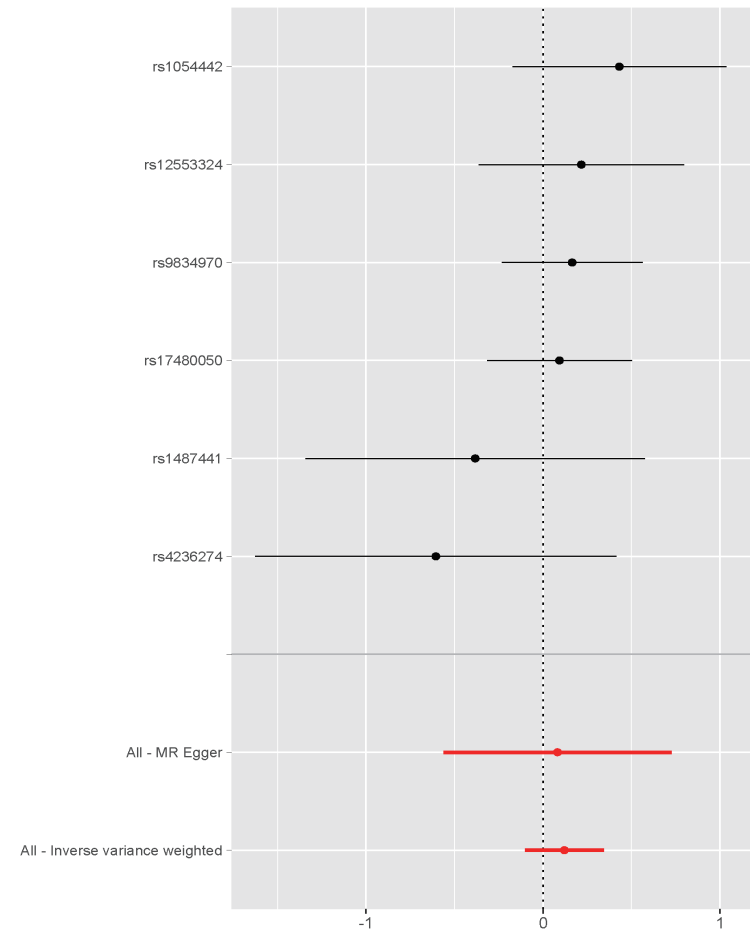

B

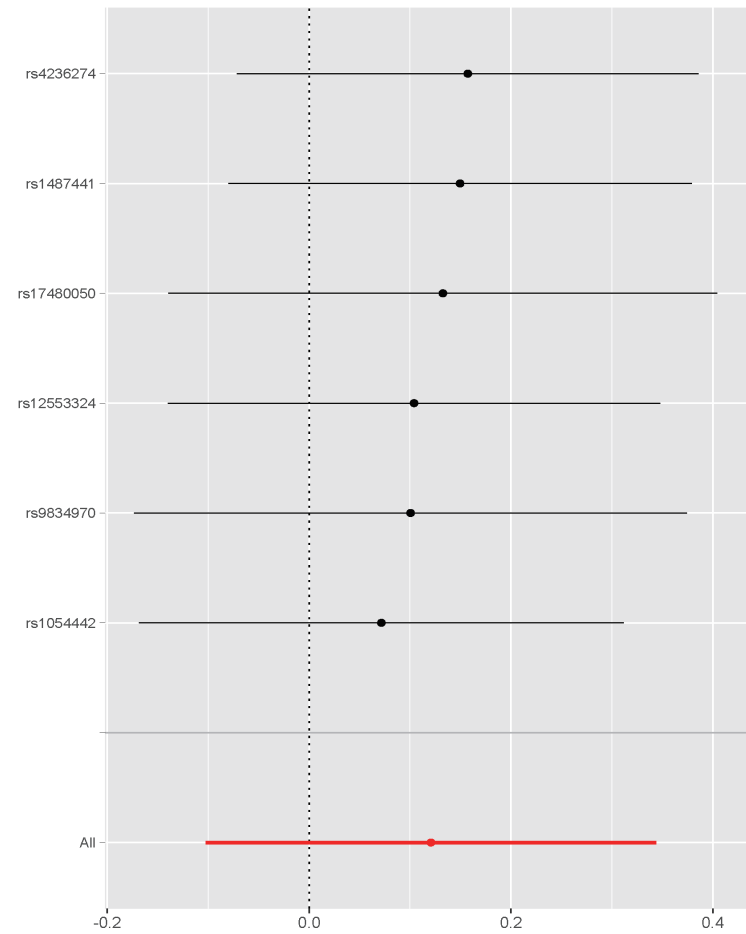

C

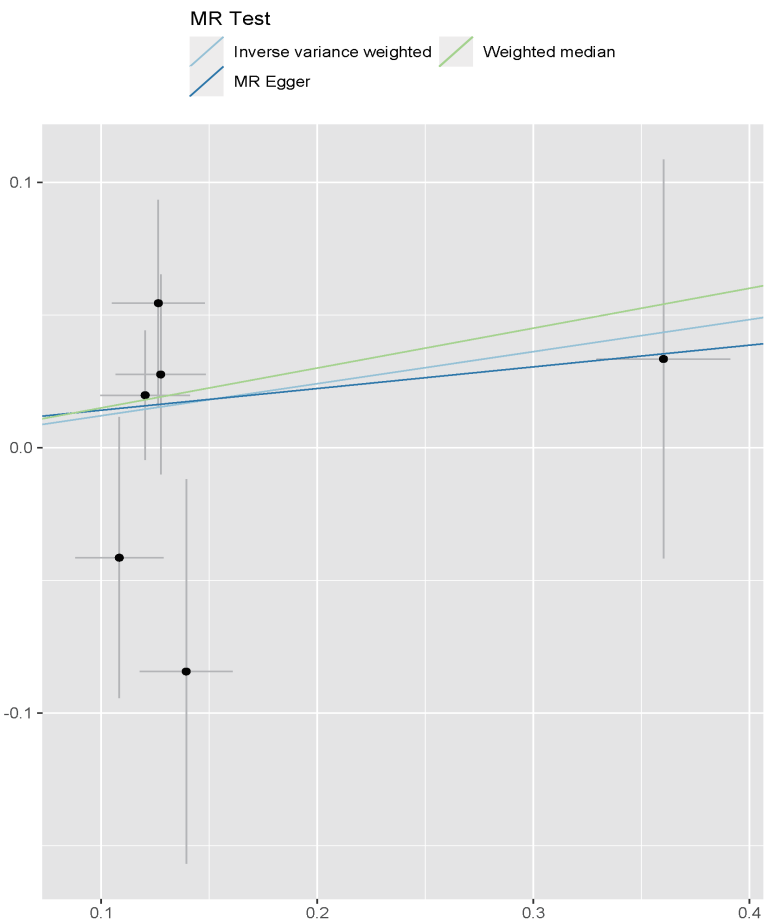

D

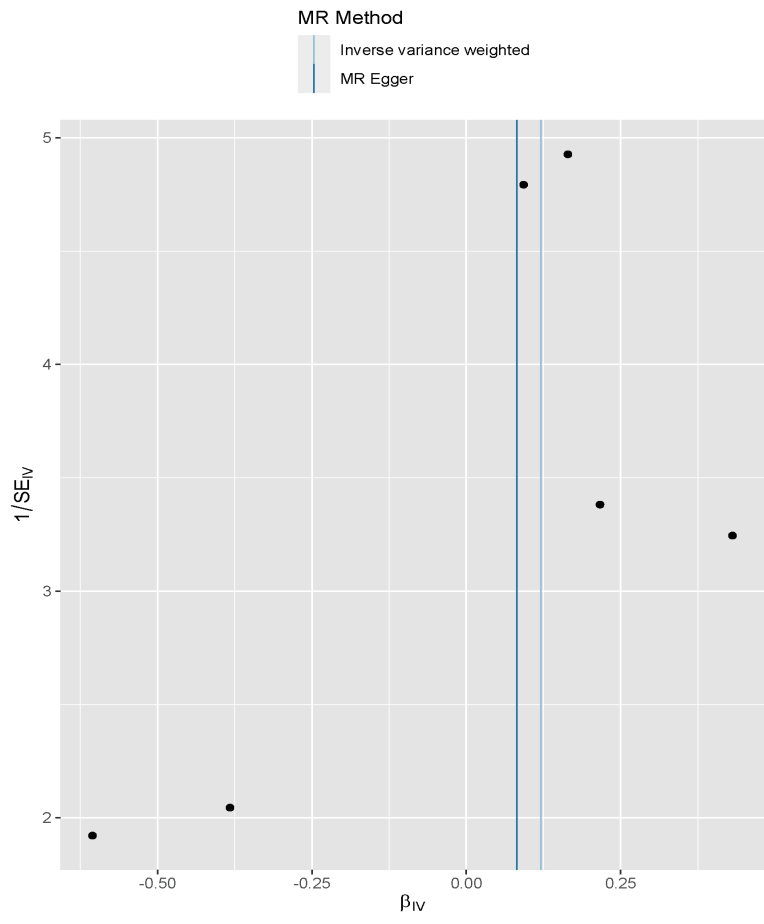

Supplementary Figure S31. Forest plot (A), Leave-one-out plot (B), scatter plot (C) and funnel plot (D) of the causal effect of mania on NAFLD.

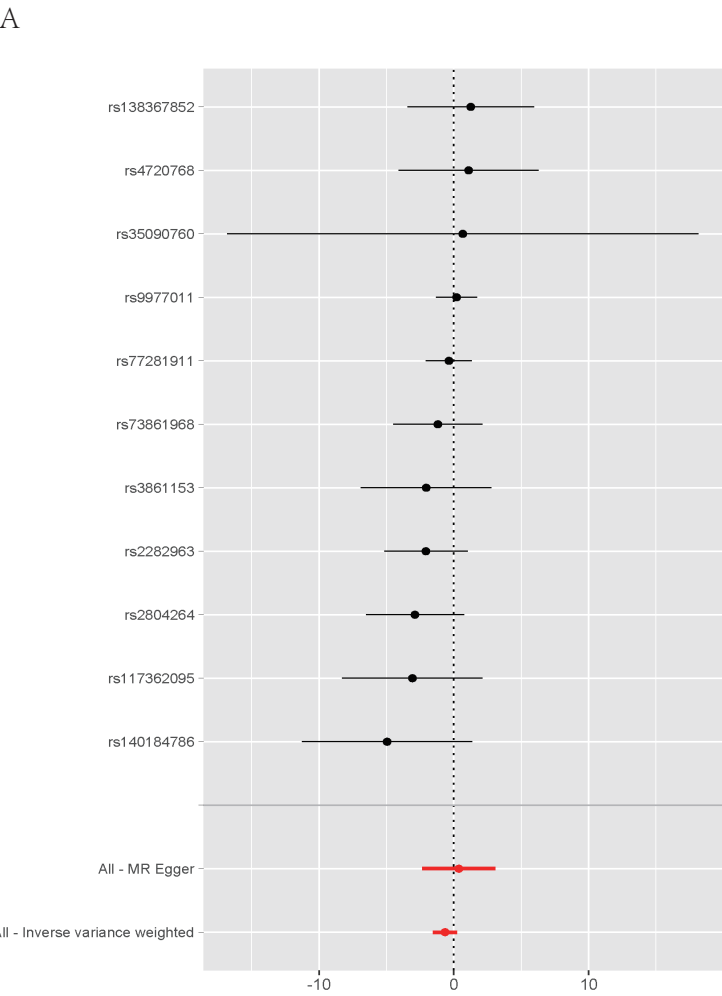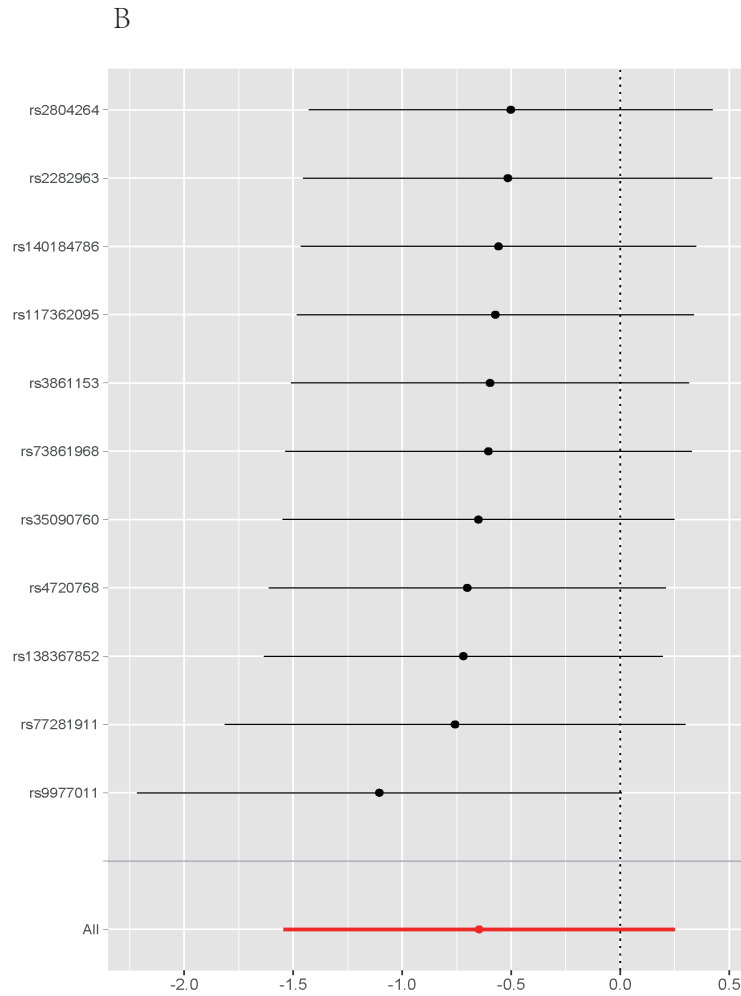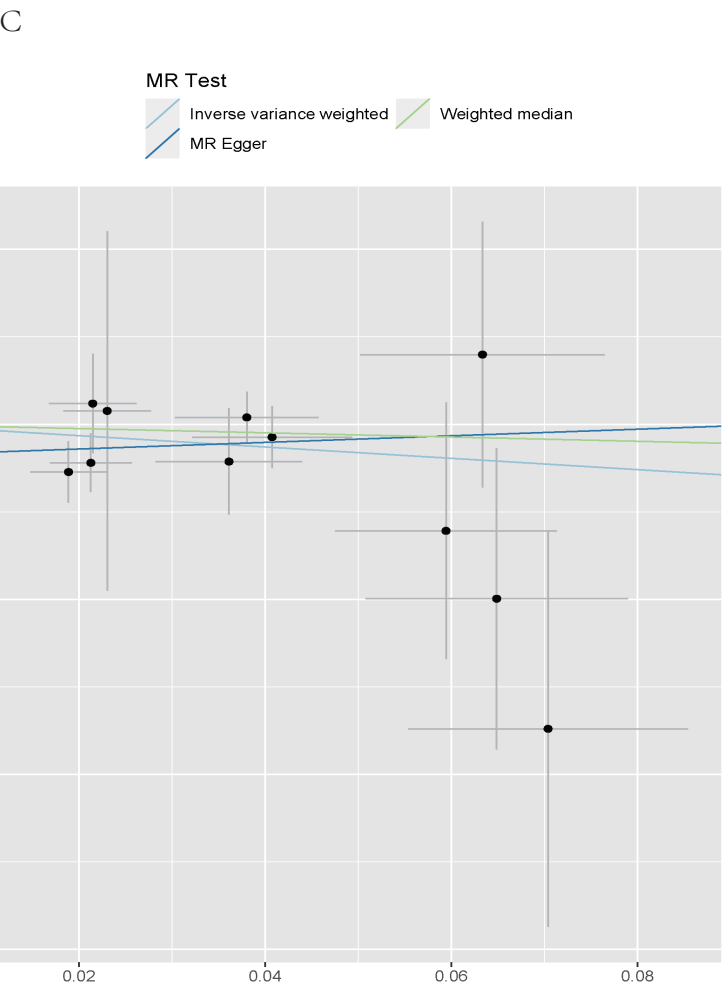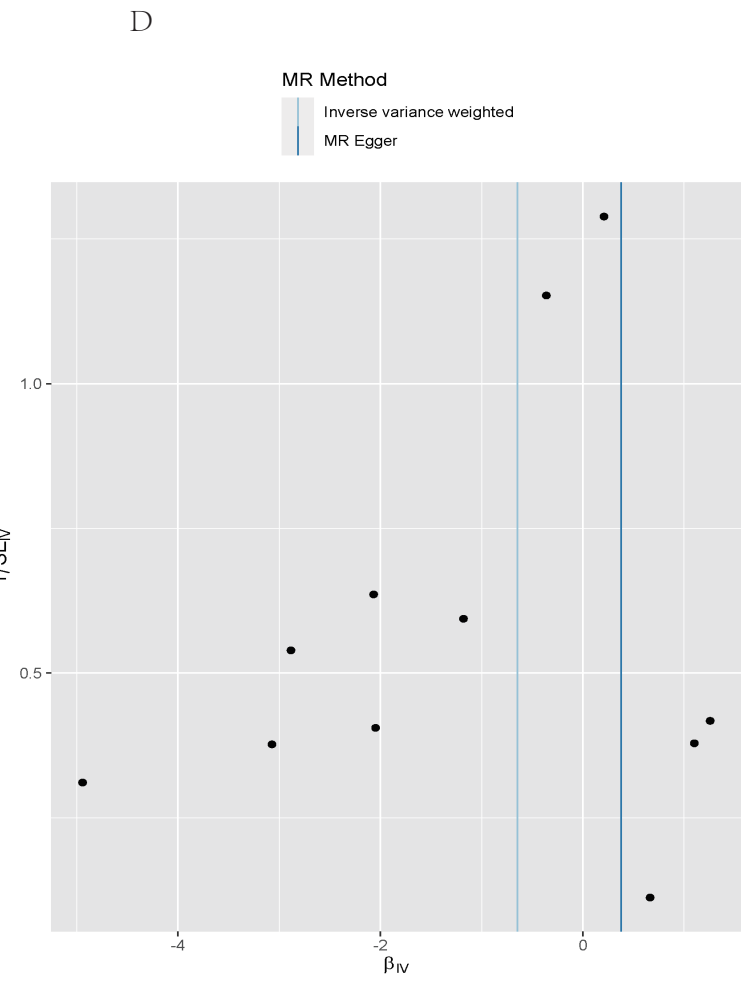

Supplementary Figure S32. Forest plot (A), Leave-one-out plot (B), scatter plot (C) and funnel plot (D) of the causal effect of Alzheimer's disease on NAFLD.

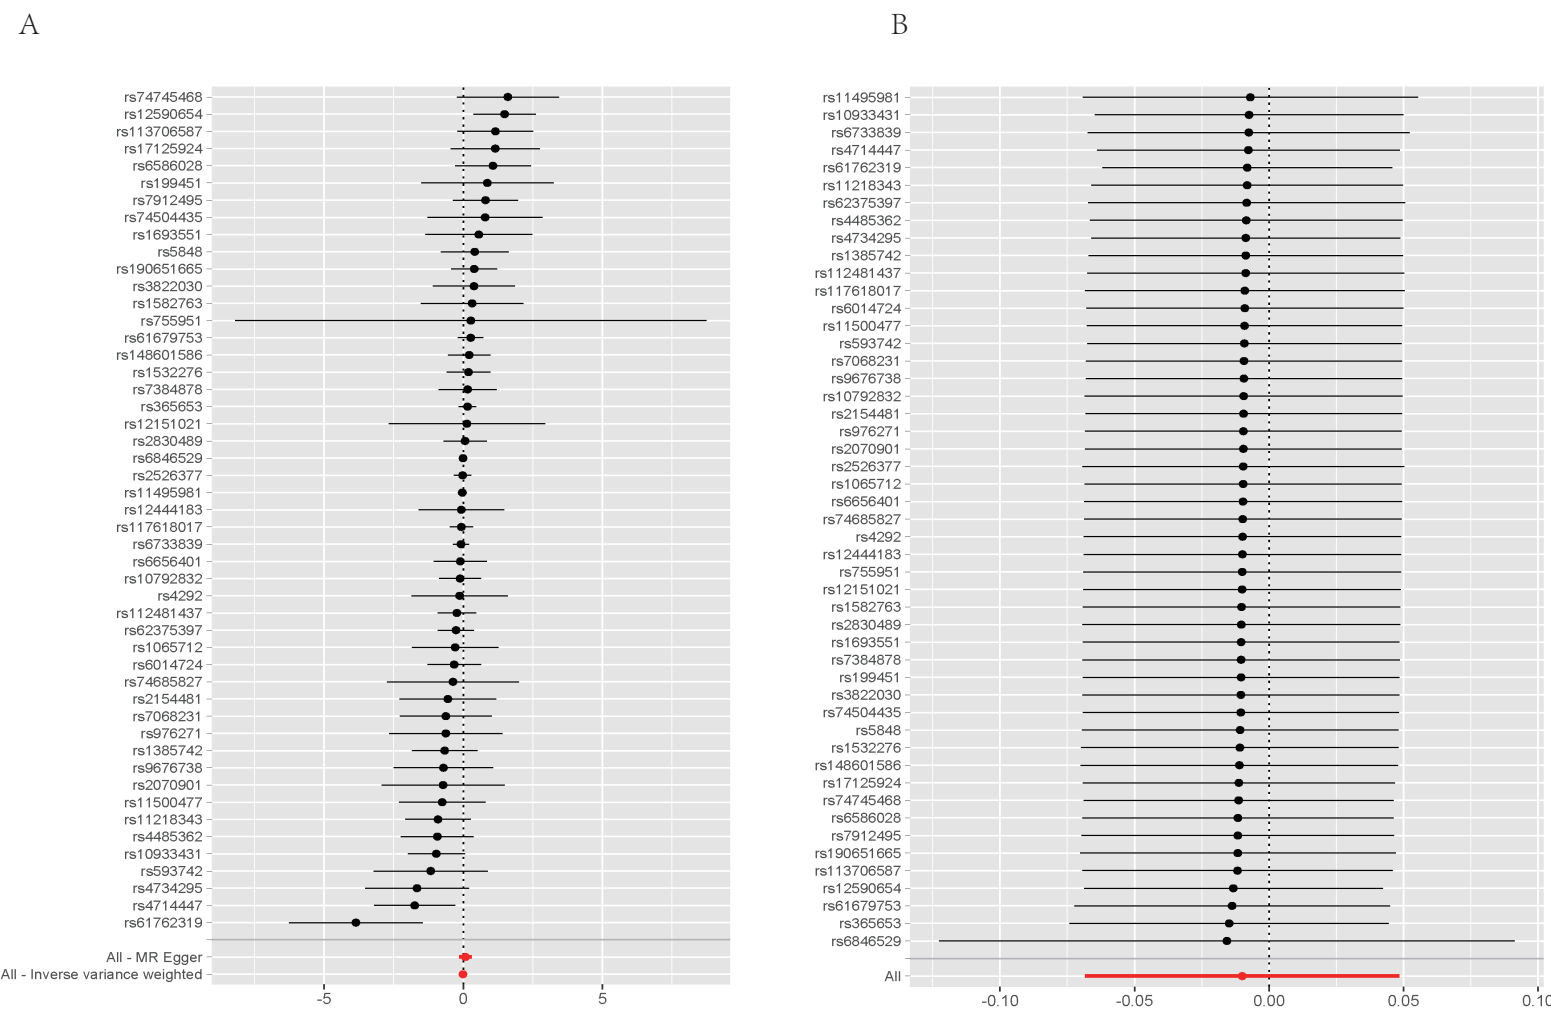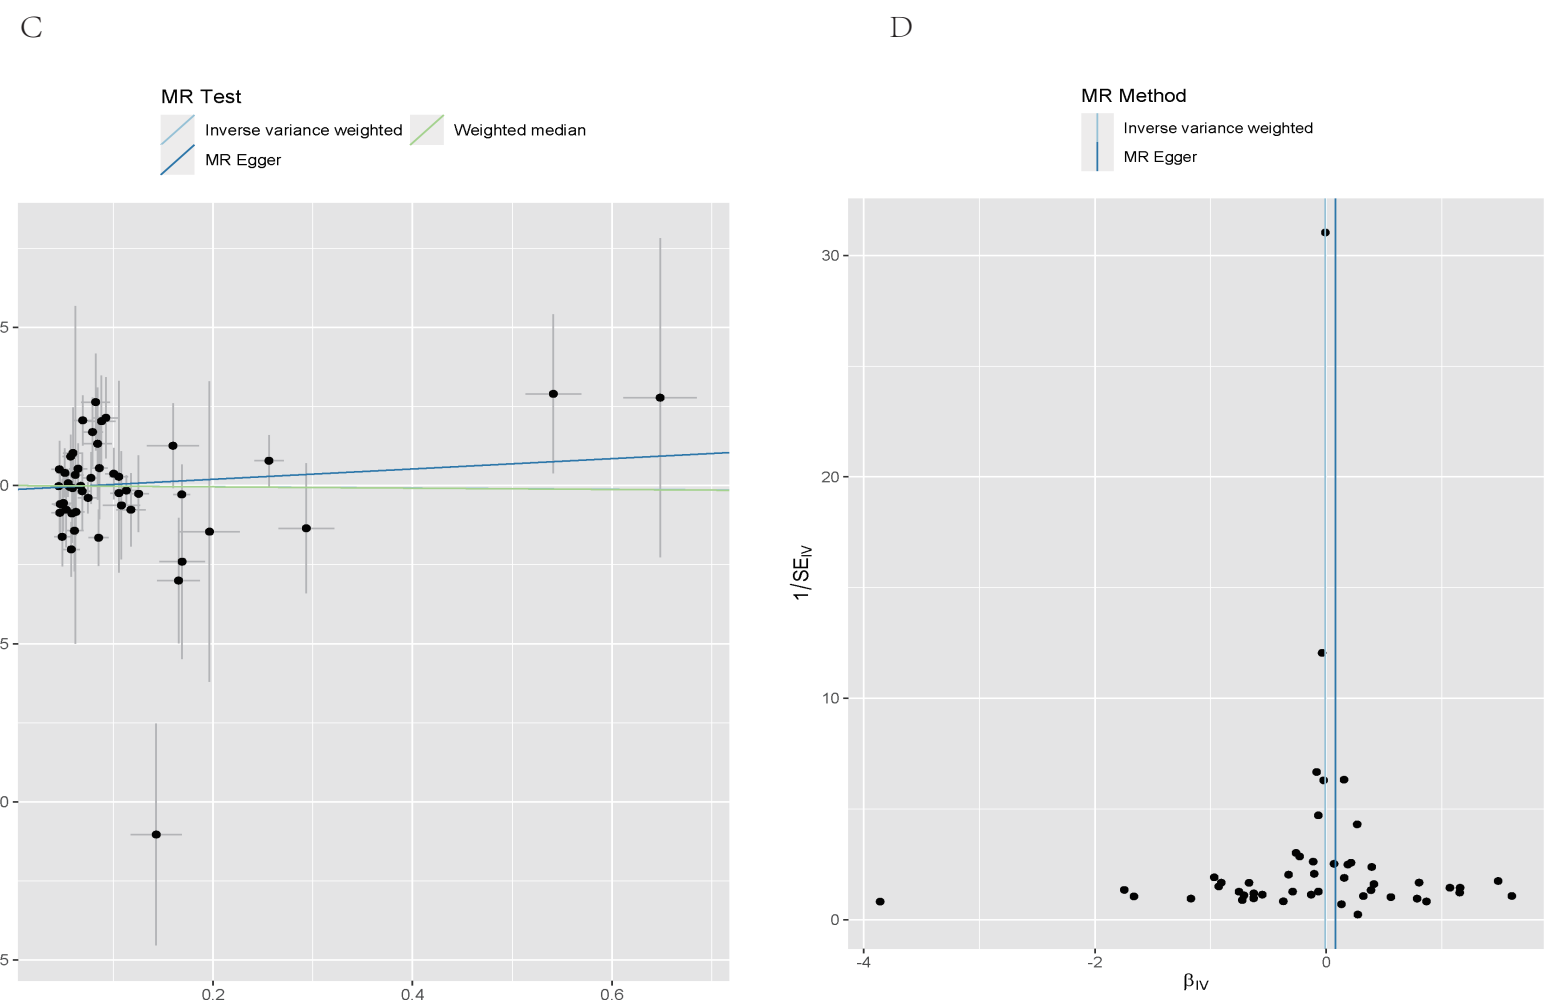

Supplementary Figure S33. Forest plot (A), Leave-one-out plot (B), scatter plot (C) and funnel plot (D) of the causal effect of Parkinson's disease on NAFLD.

A

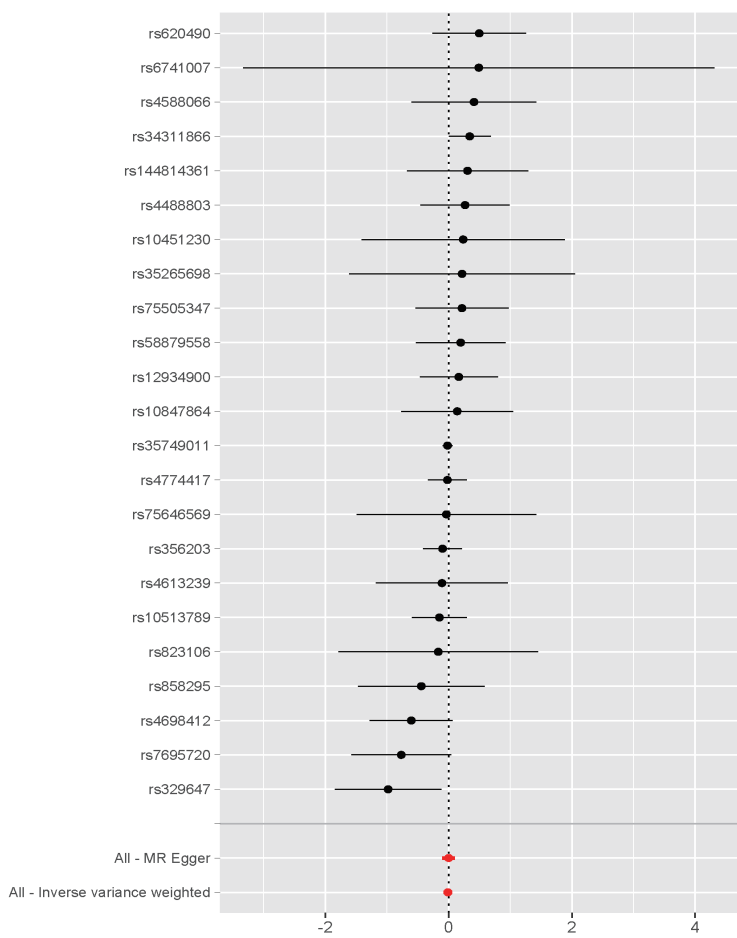

B

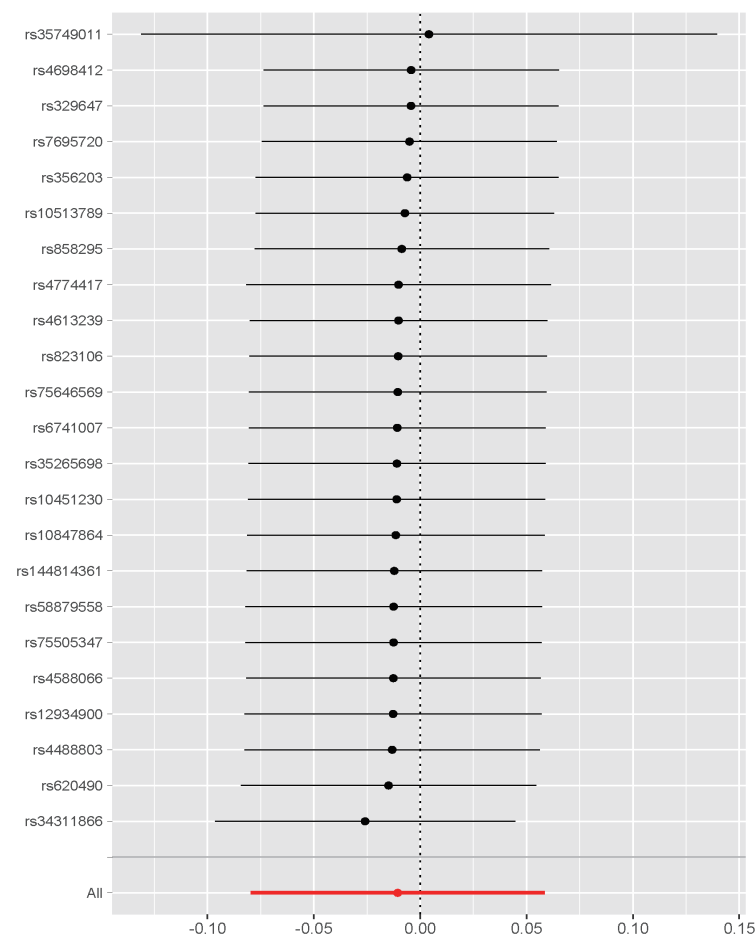

C

MR Test

- Inverse variance weighted
- MR Egger
- Weighted median

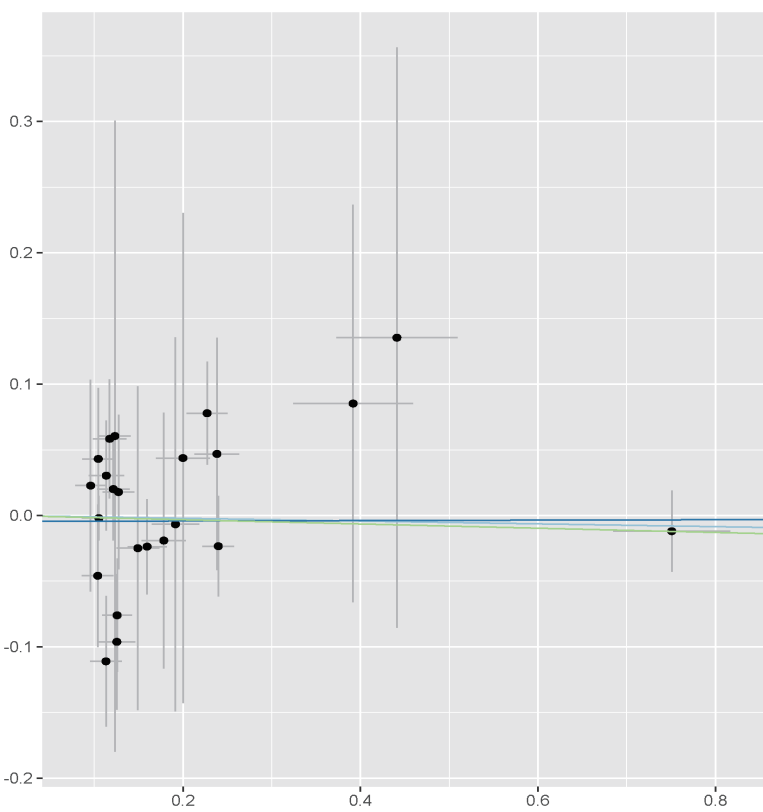

D

MR Method

- Inverse variance weighted
- MR Egger

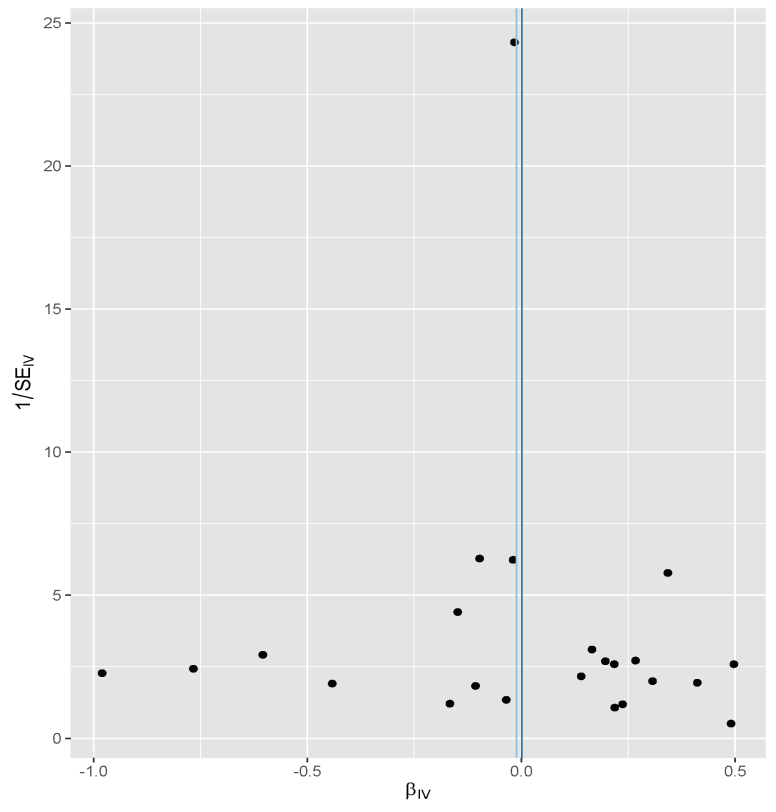

Supplementary Figure S34. Forest plot (A), Leave-one-out plot (B), scatter plot (C) and funnel plot (D) of the causal effect of epilepsy on NAFLD.

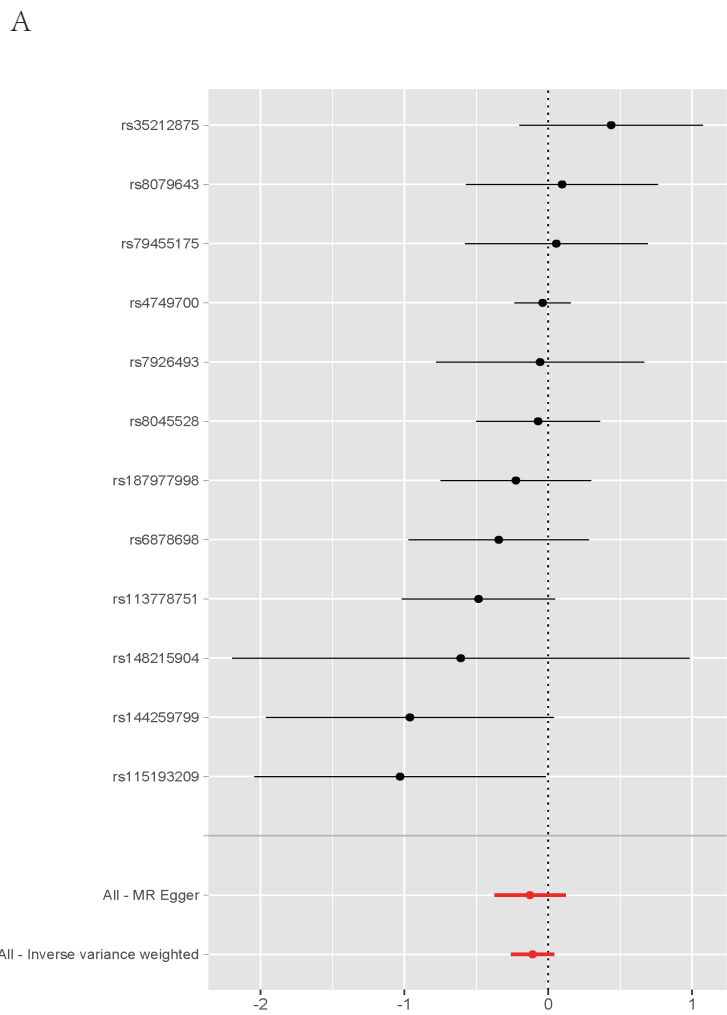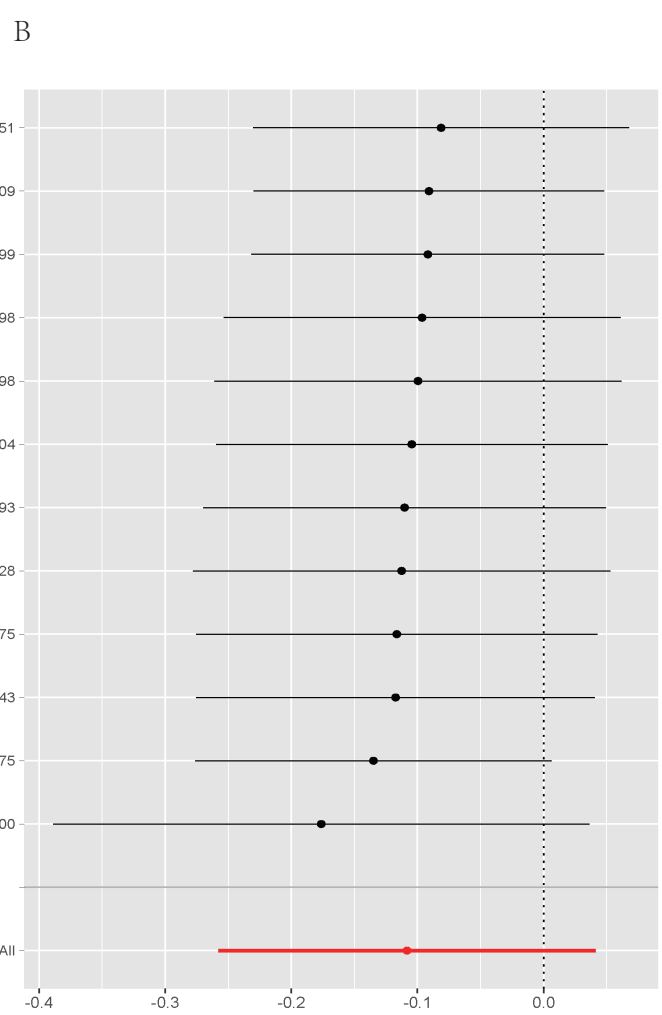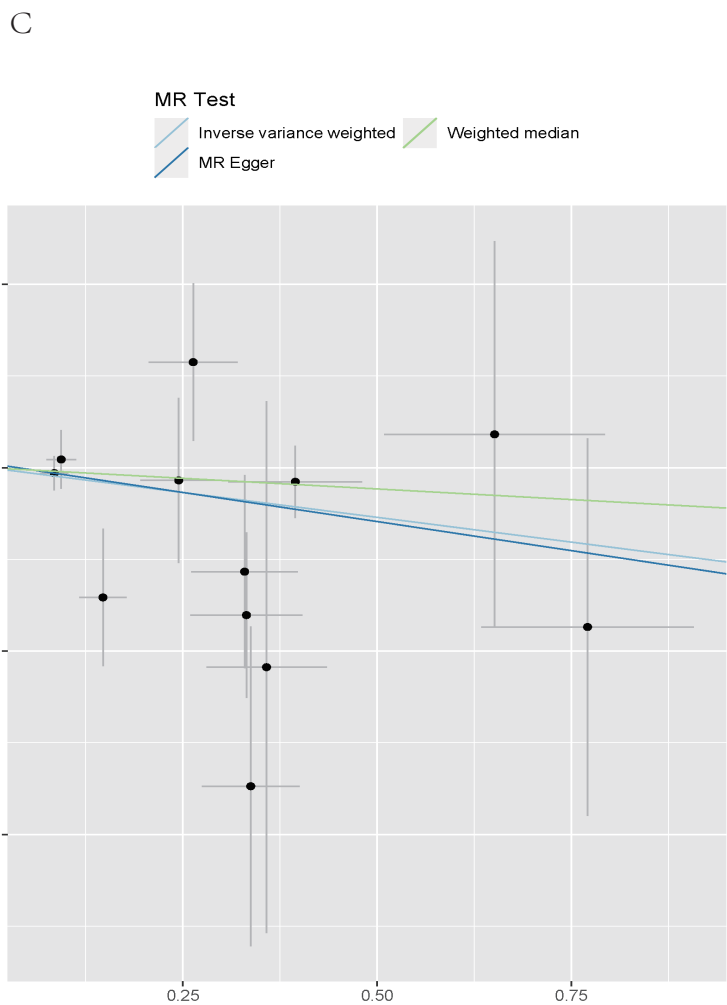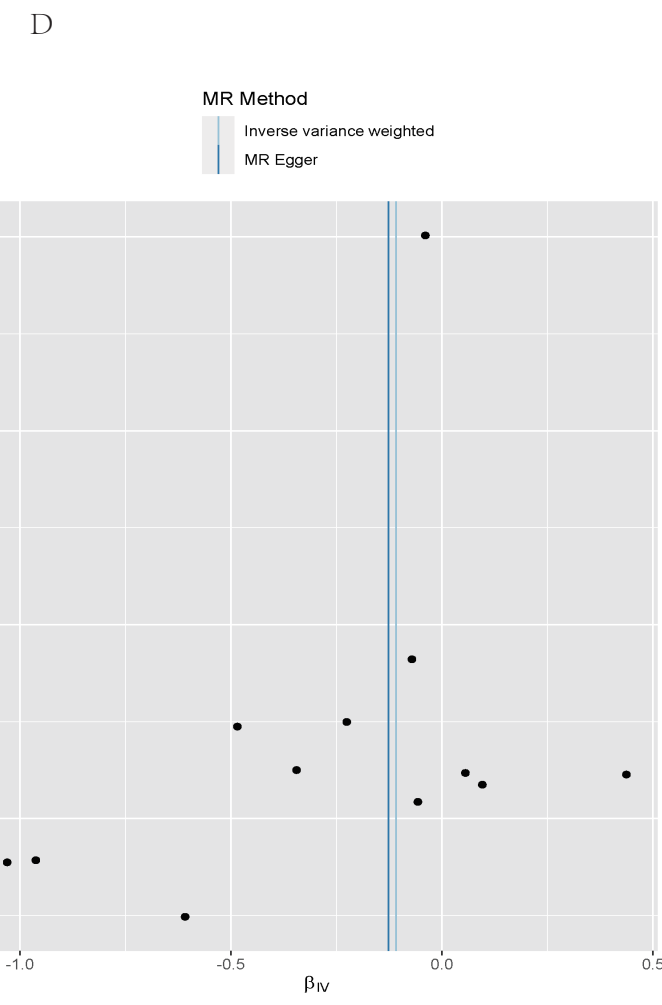

Supplementary Figure S35. Forest plot (A), Leave-one-out plot (B), scatter plot (C) and funnel plot (D) of the causal effect of Amyotrophic lateral sclerosis on NAFLD.

A

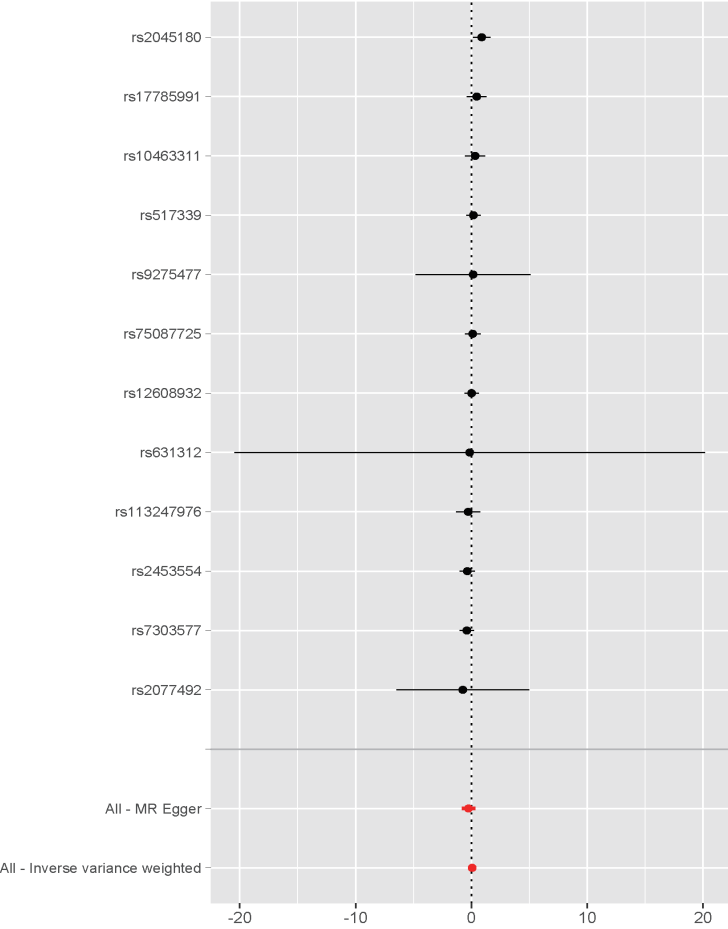

B

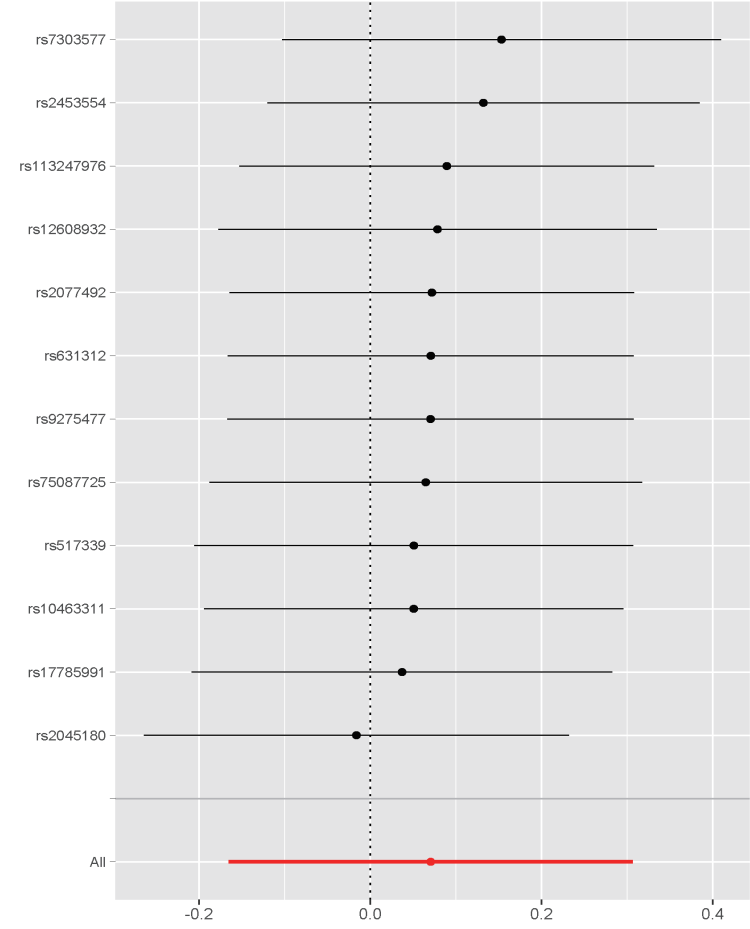

C

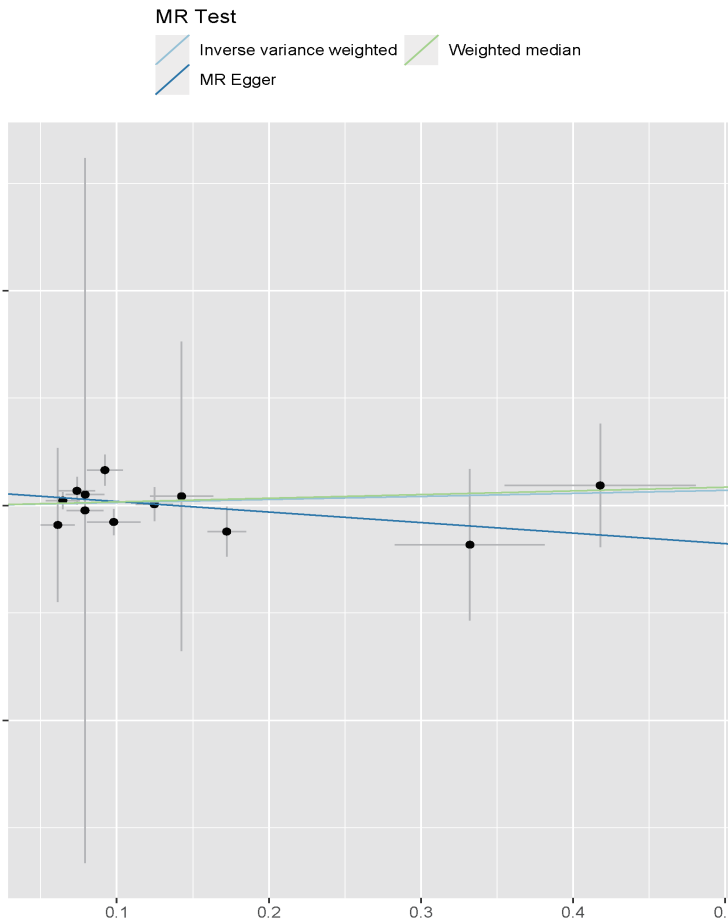

D

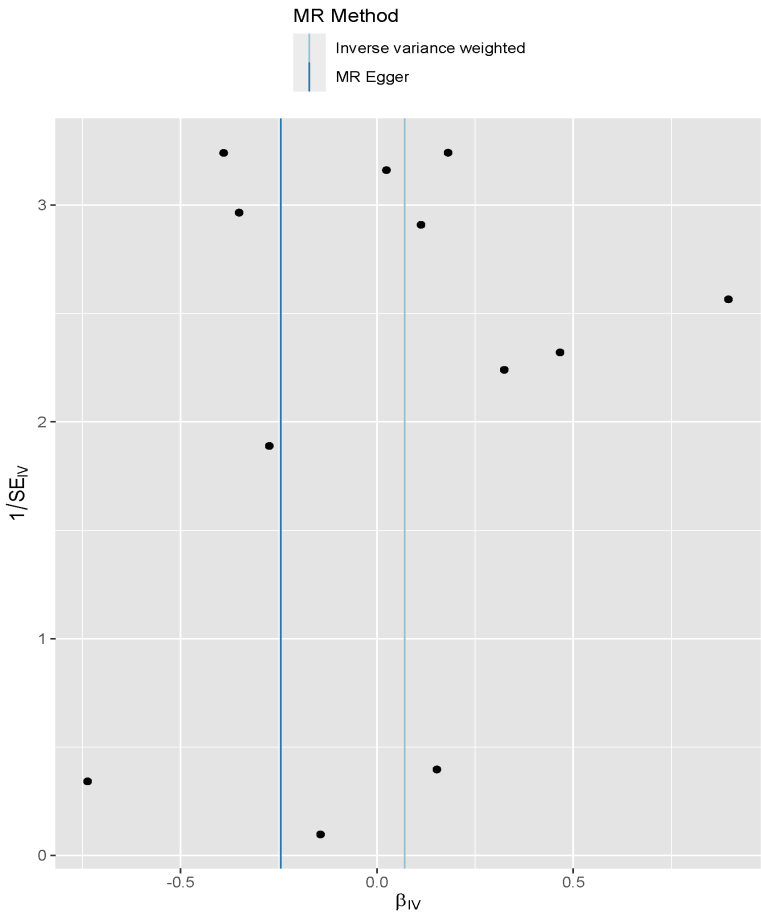

Supplementary Figure S36. Forest plot (A), Leave-one-out plot (B), scatter plot (C) and funnel plot (D) of the causal effect of migraines on NAFLD.

A

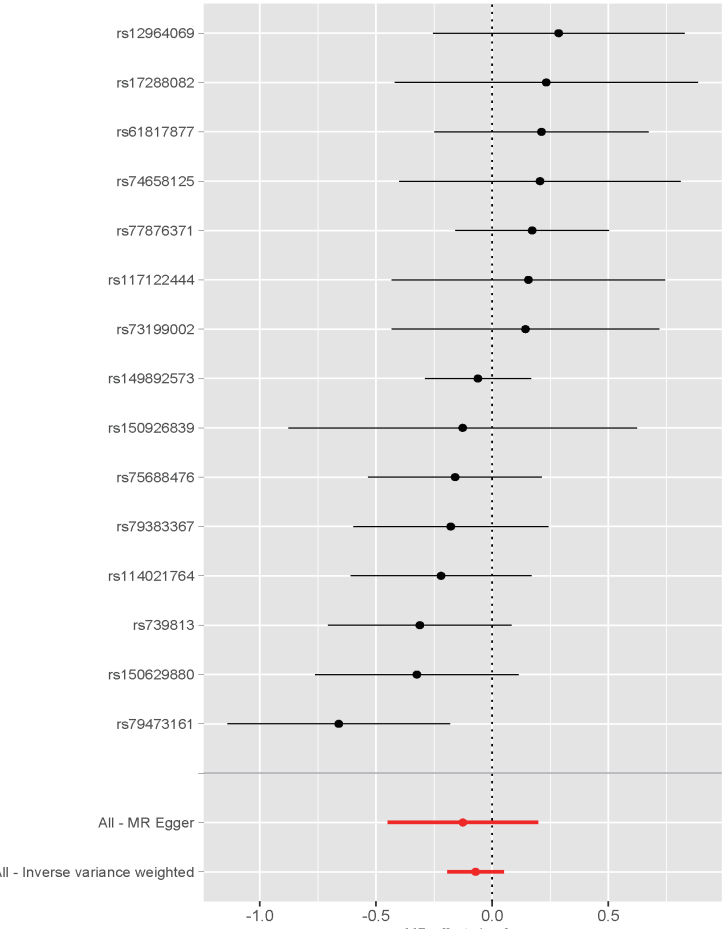

B

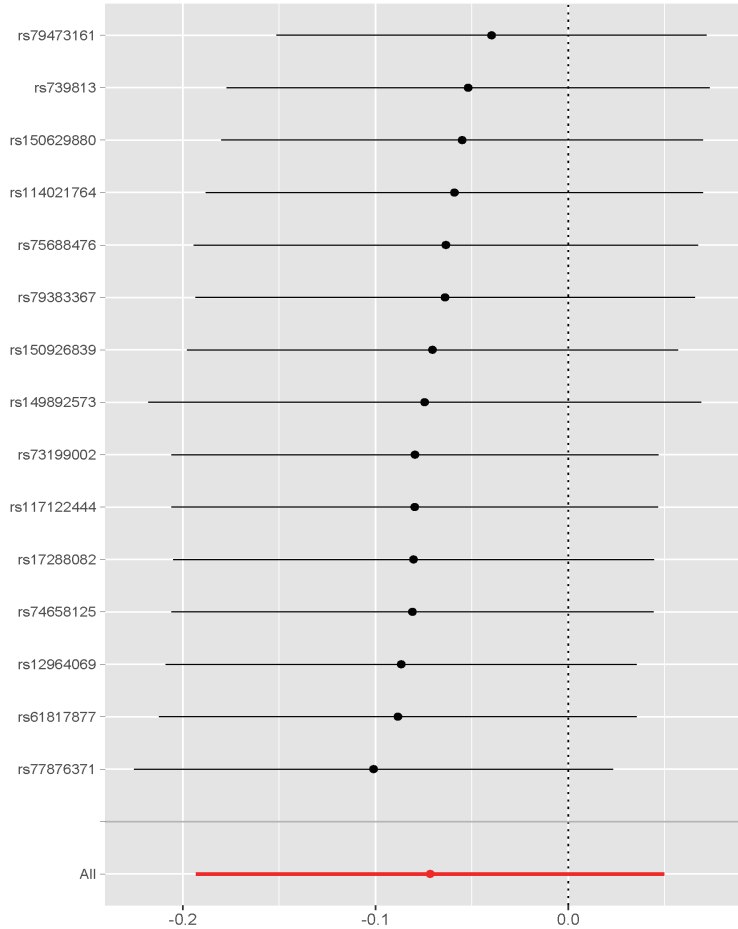

C

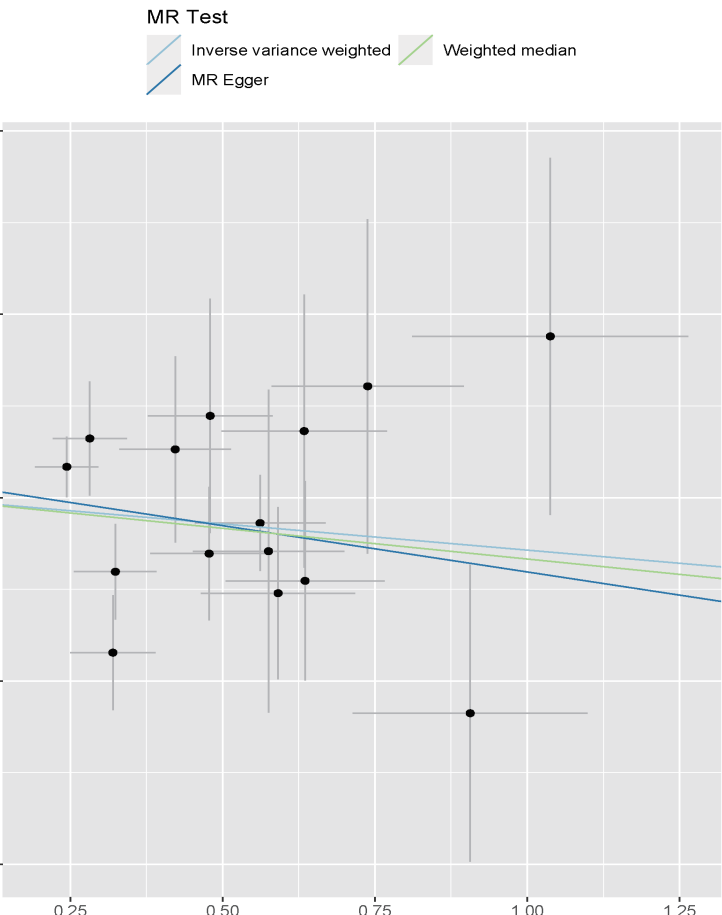

D

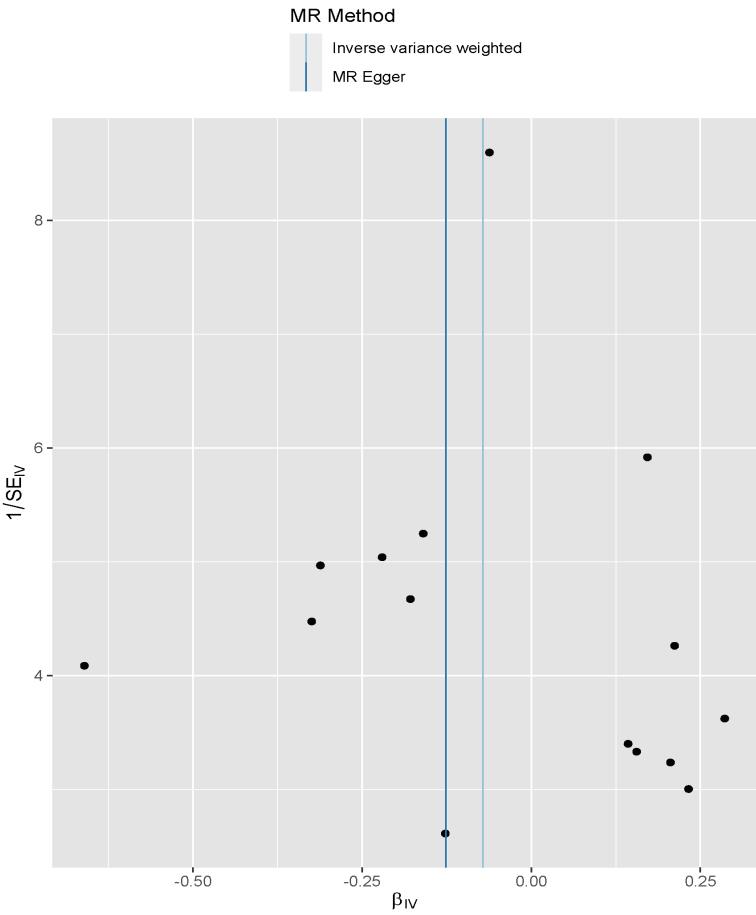



Supplementary Figure S37. Forest plot (A), Leave-one-out plot (B), scatter plot (C) and funnel plot (D) of the causal effect of NAFLD on anxiety.

A

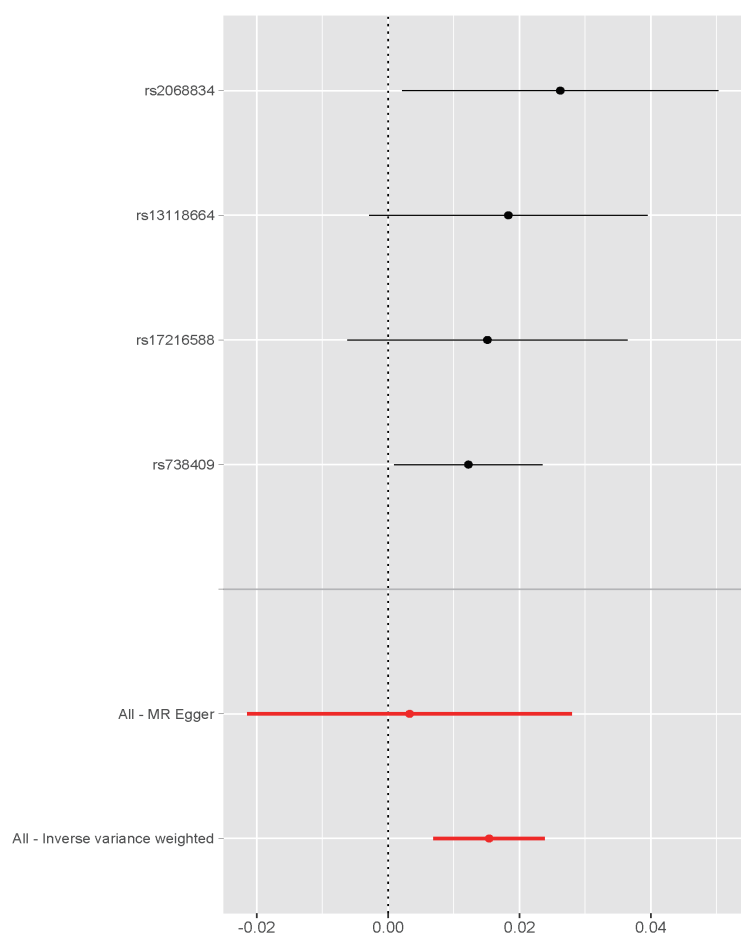

B

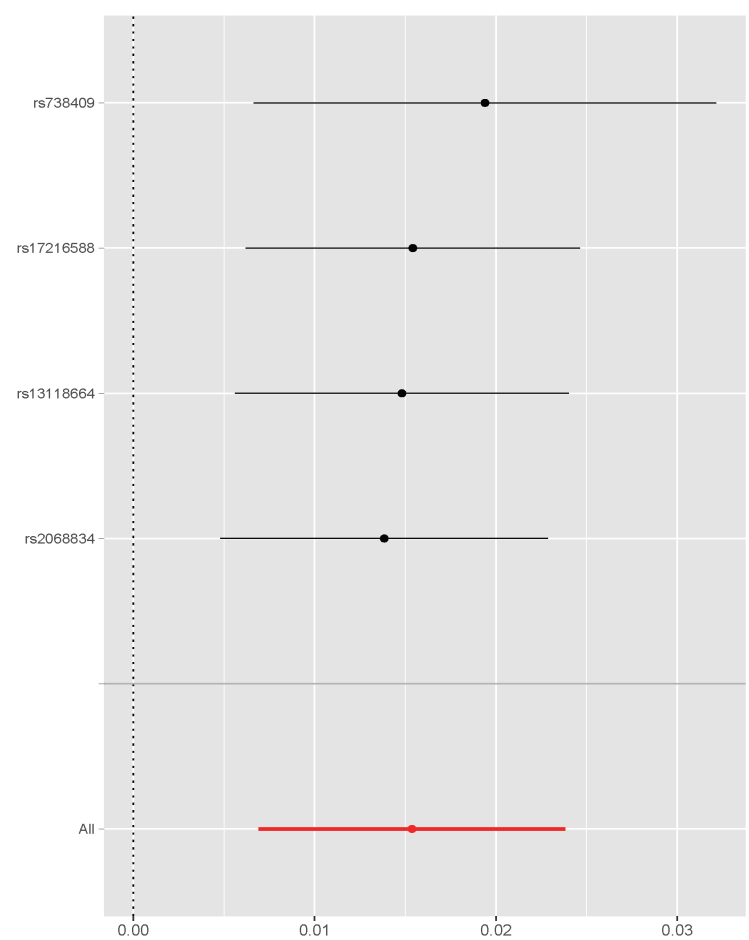

C

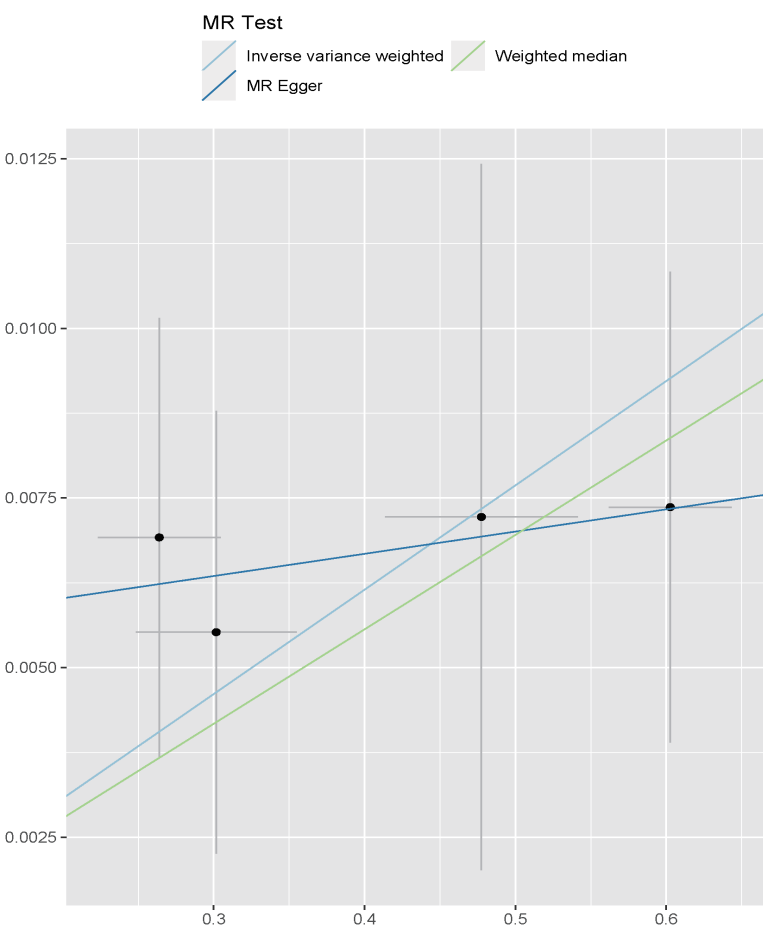

D

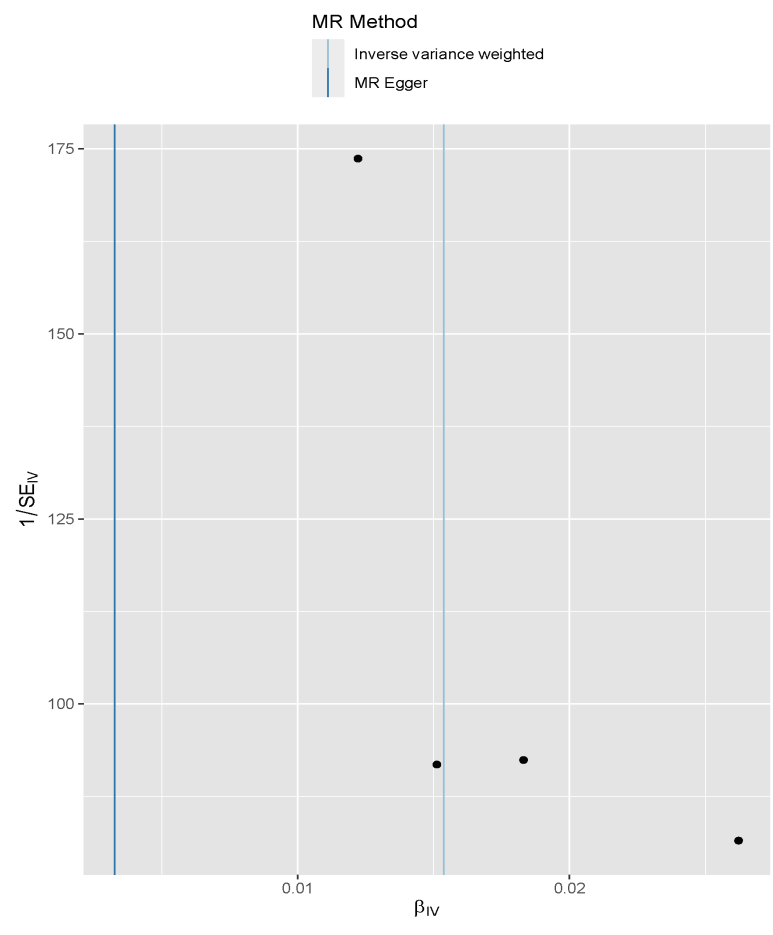

Supplementary Figure S38. Forest plot (A), Leave-one-out plot (B), scatter plot (C) and funnel plot (D) of the causal effect of NAFLD on schizophrenia.

A

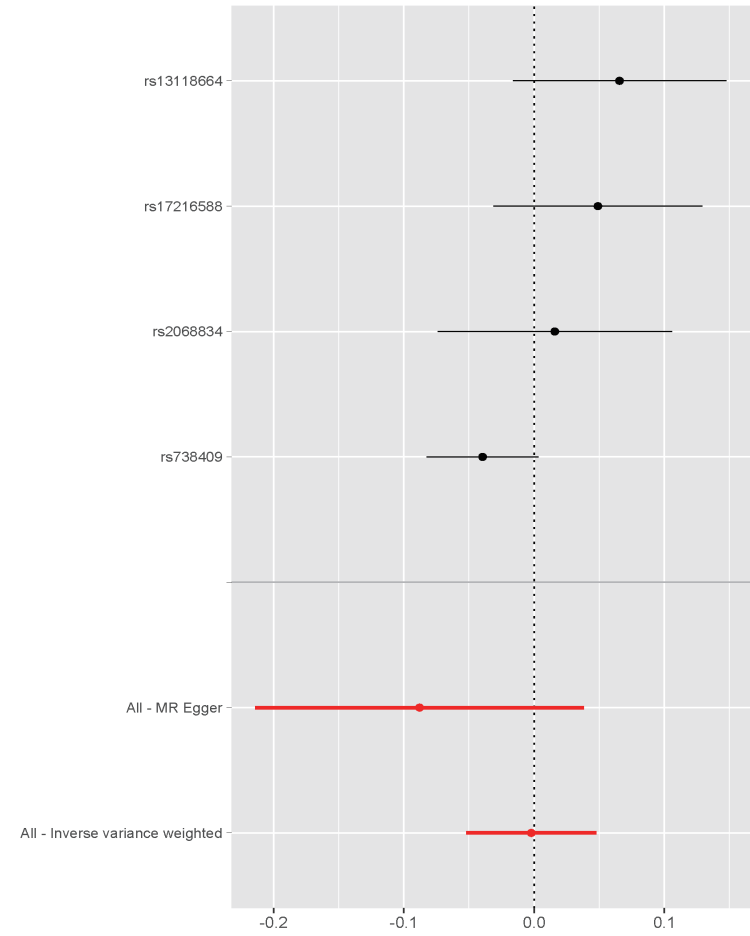

B

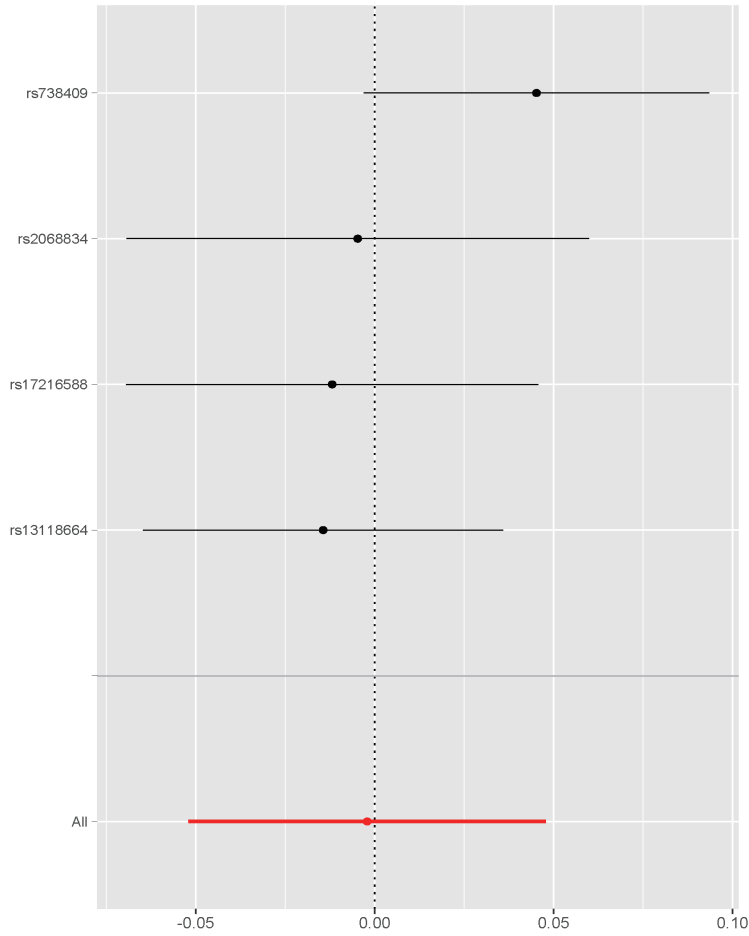

C

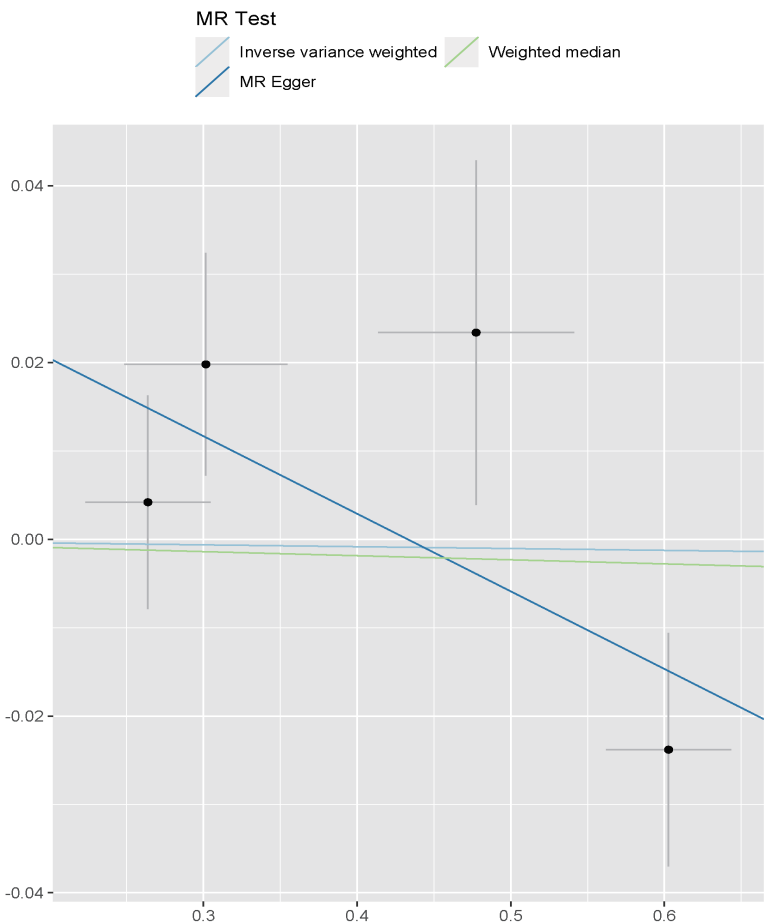

D

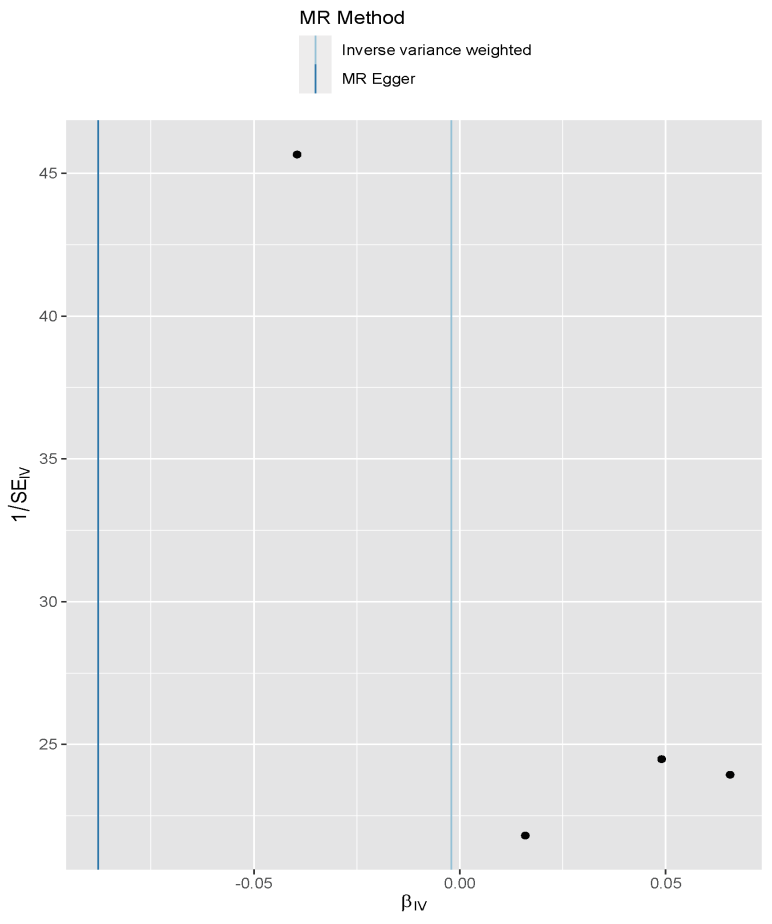

Supplementary Figure S39. Forest plot (A), Leave-one-out plot (B), scatter plot (C) and funnel plot (D) of the causal effect of NAFLD on Post-traumatic stress disorder.

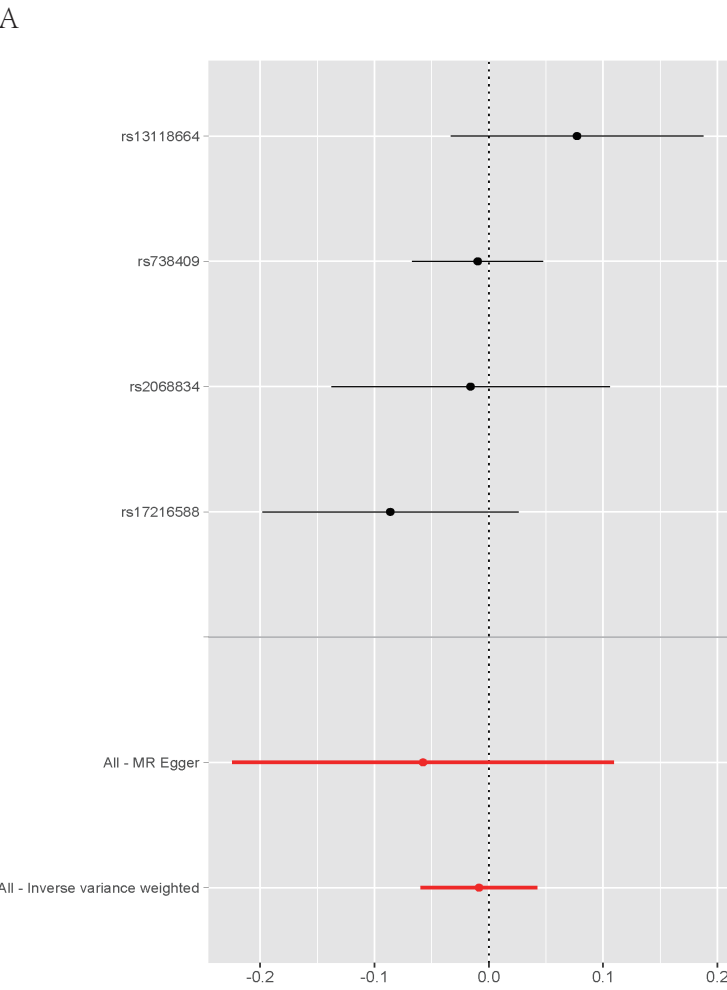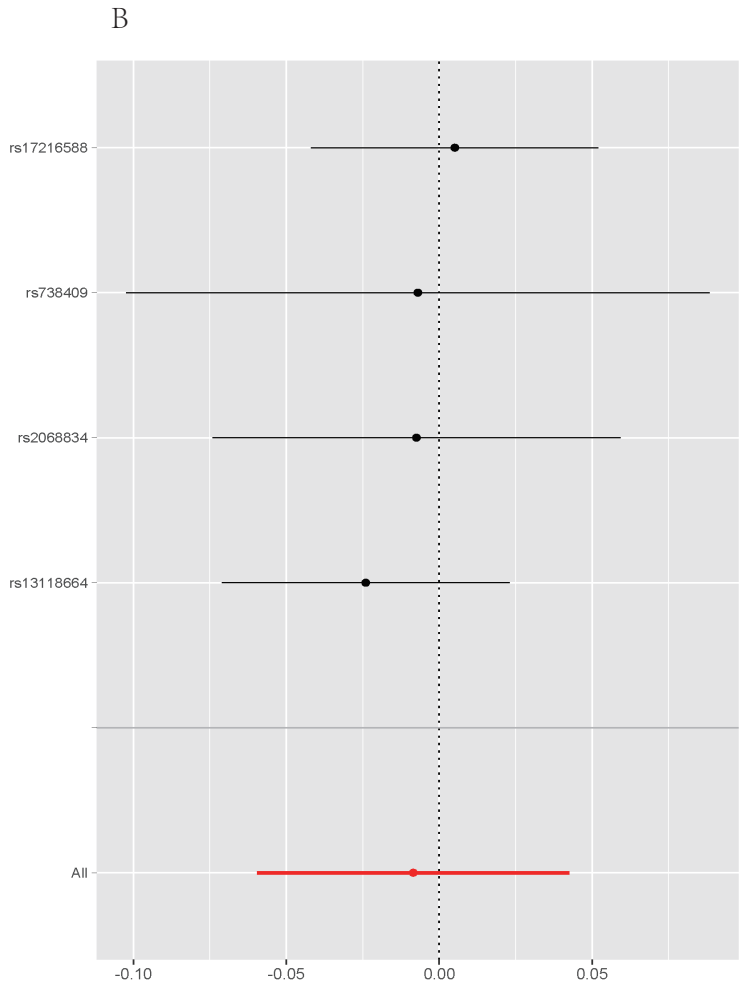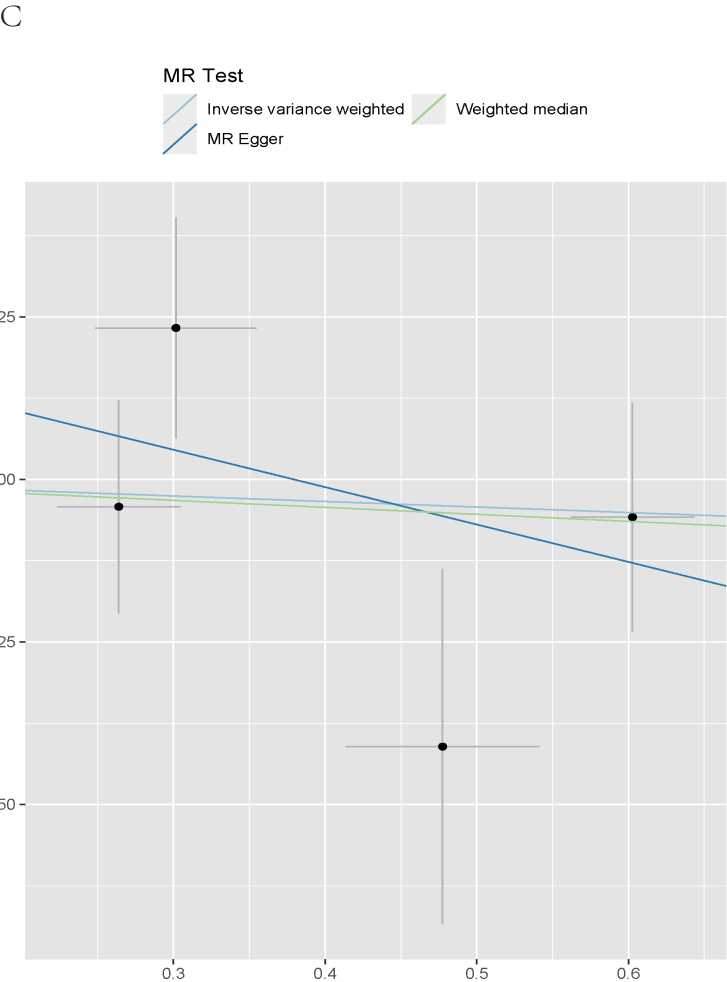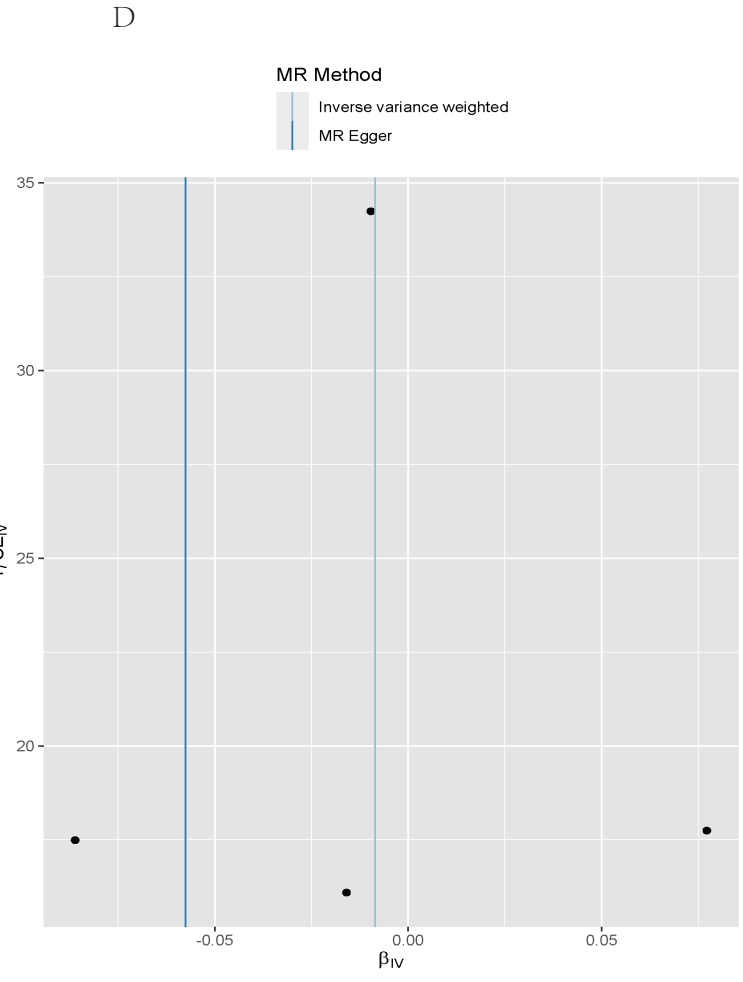

Supplementary Figure S40. Forest plot (A), Leave-one-out plot (B), scatter plot (C) and funnel plot (D) of the causal effect of NAFLD on Obsessive-compulsive disorder.

A

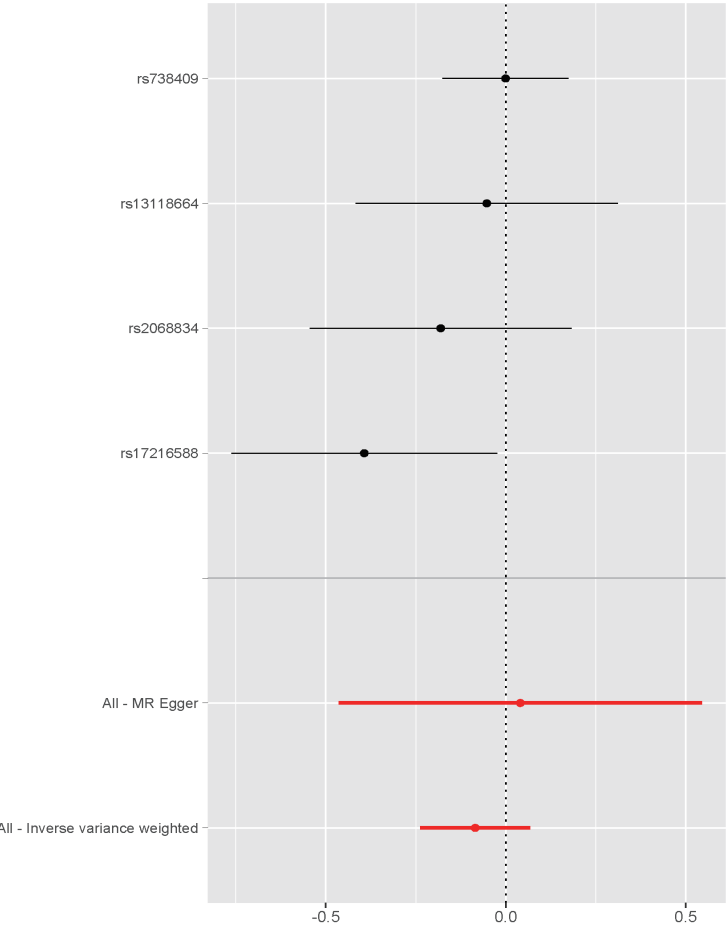

B

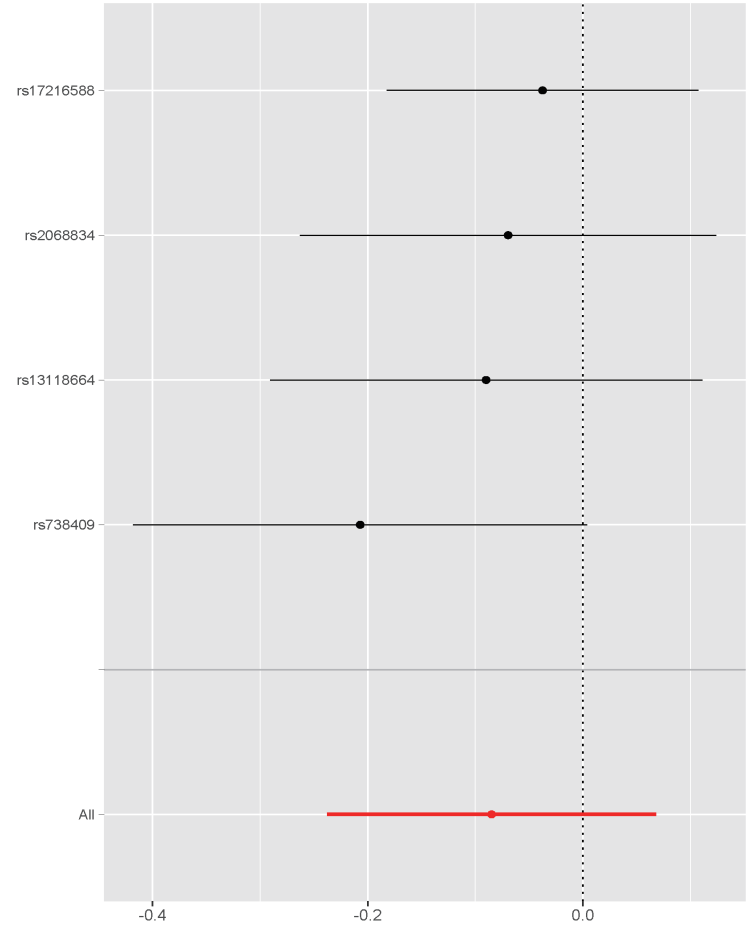

C

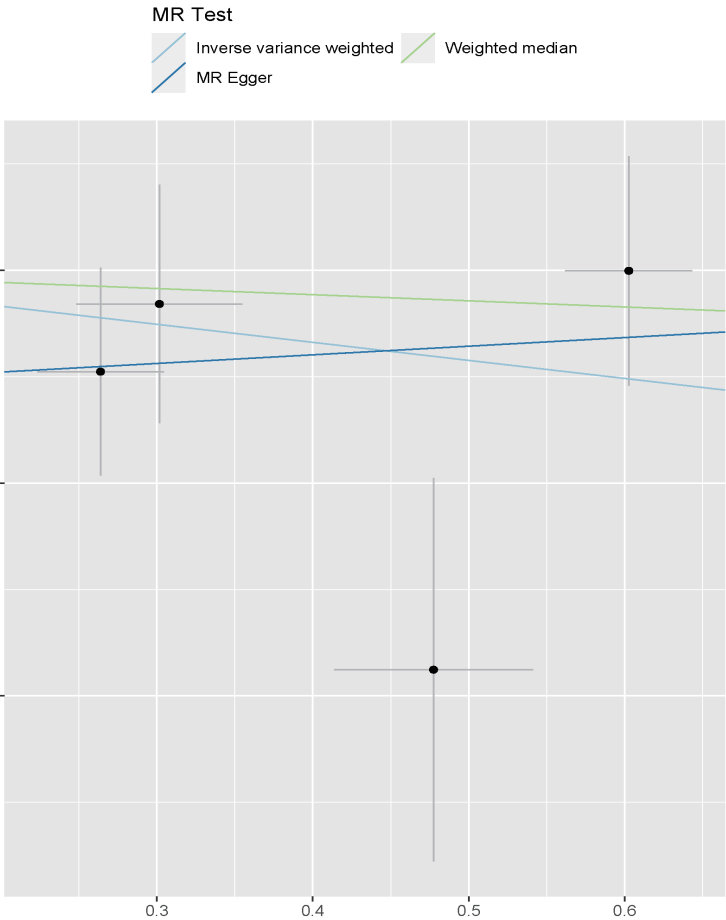

D

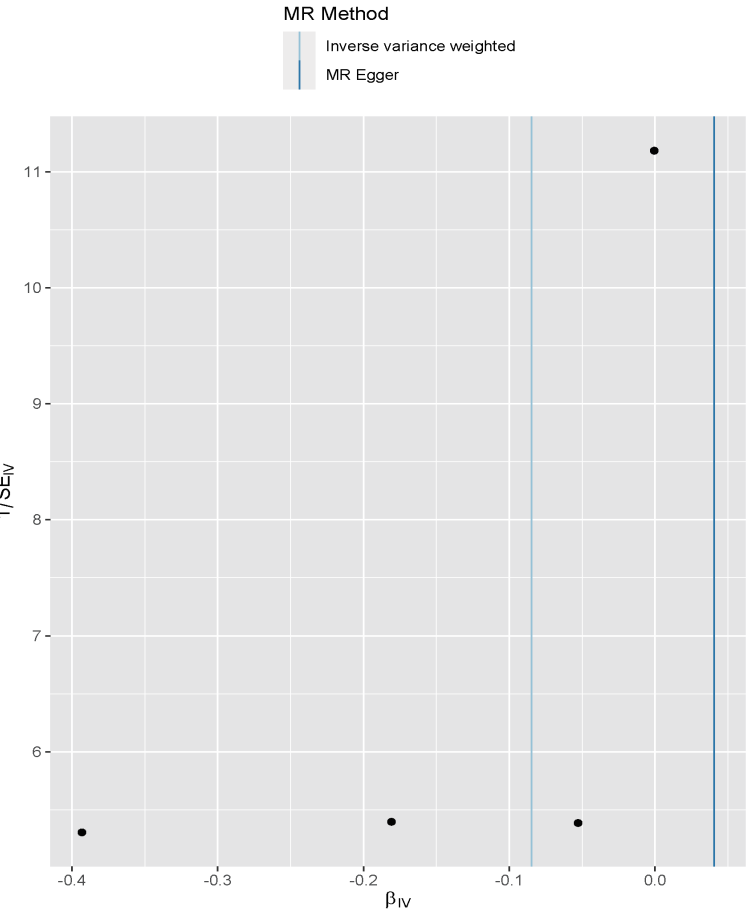

Supplementary Figure S41. Forest plot (A), Leave-one-out plot (B), scatter plot (C) and funnel plot (D) of the causal effect of NAFLD on Major Depressive Disorder.

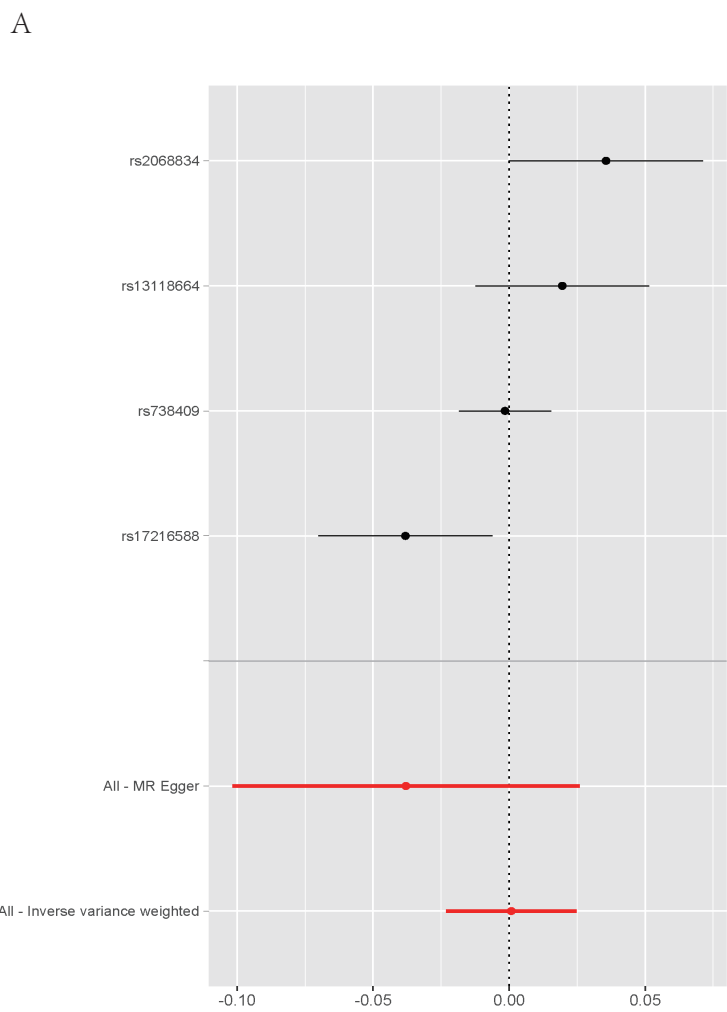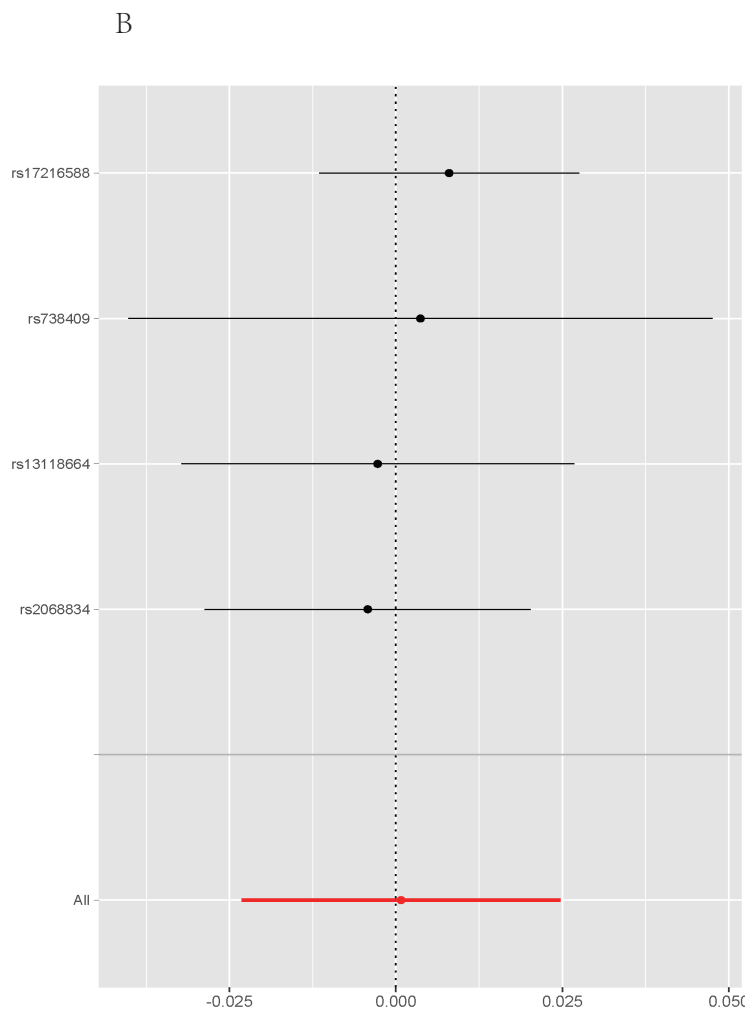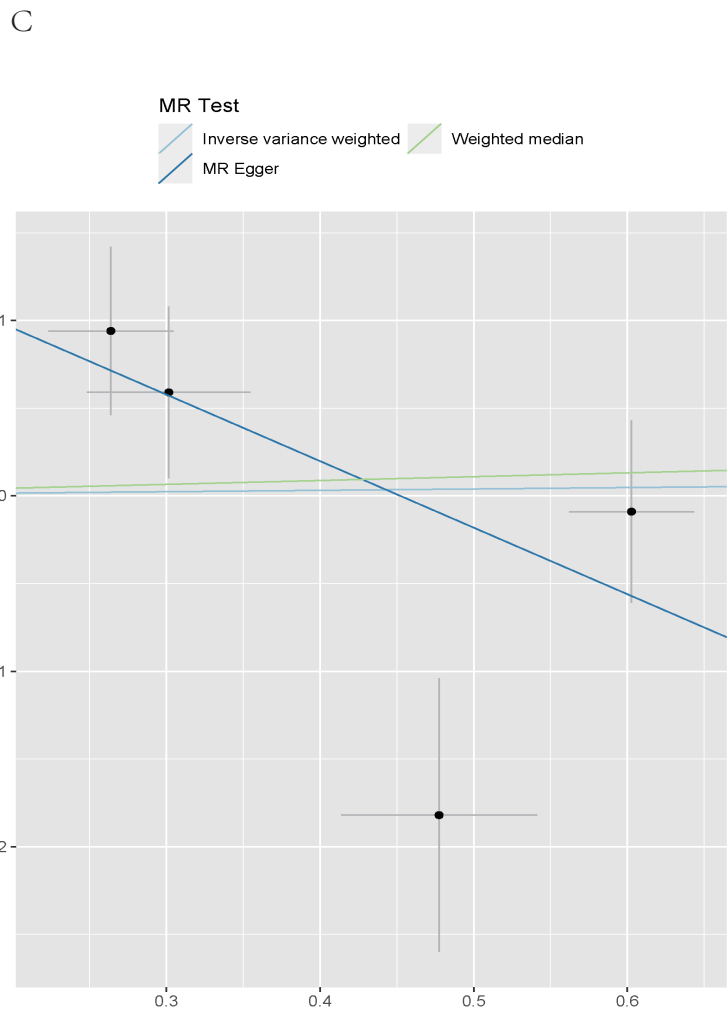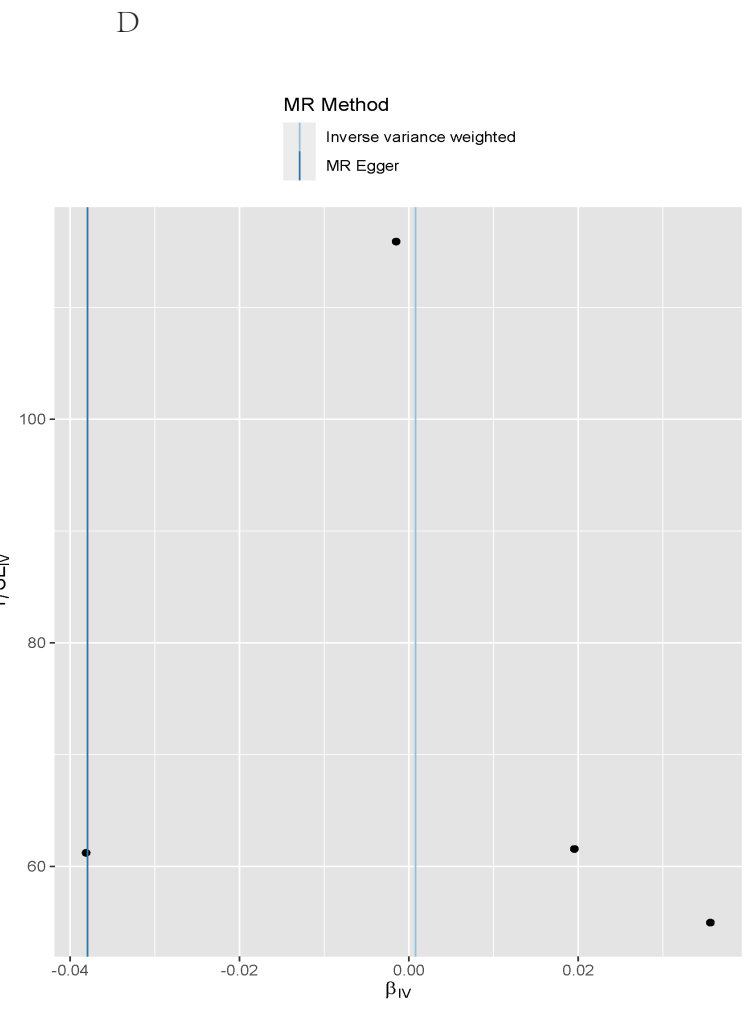

Supplementary Figure S42. Forest plot (A), Leave-one-out plot (B), scatter plot (C) and funnel plot (D) of the causal effect of NAFLD on Bipolar disorder.

A

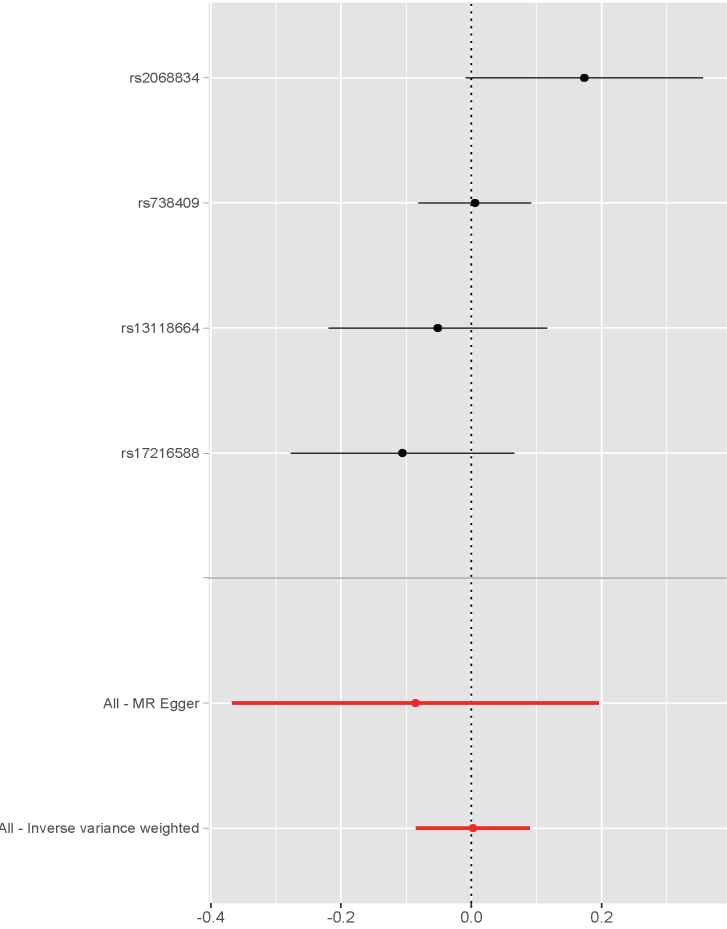

B

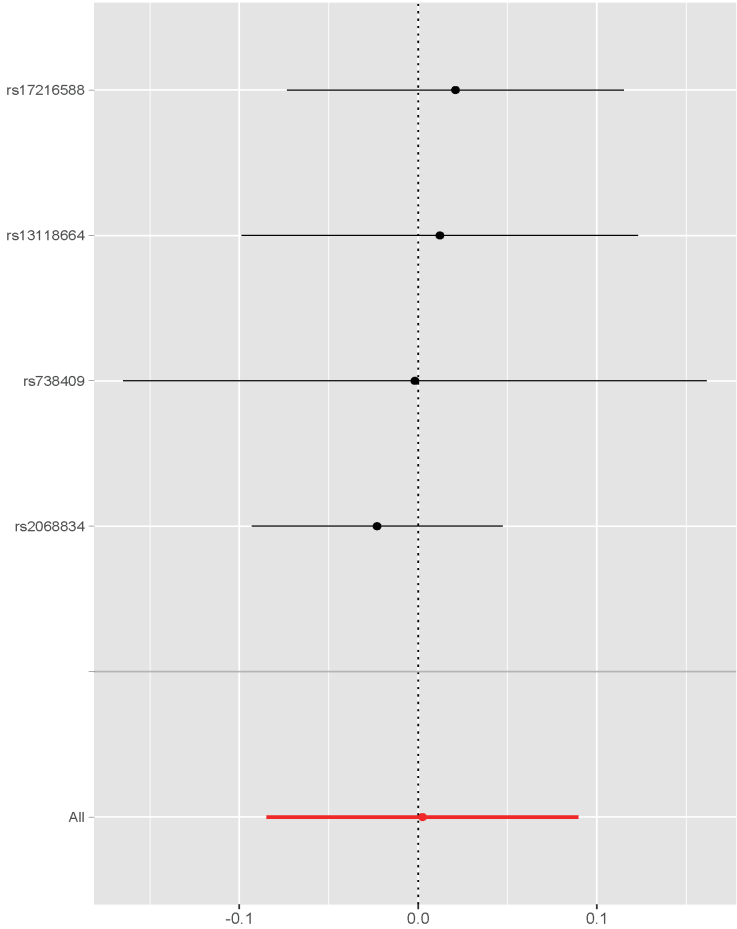

C

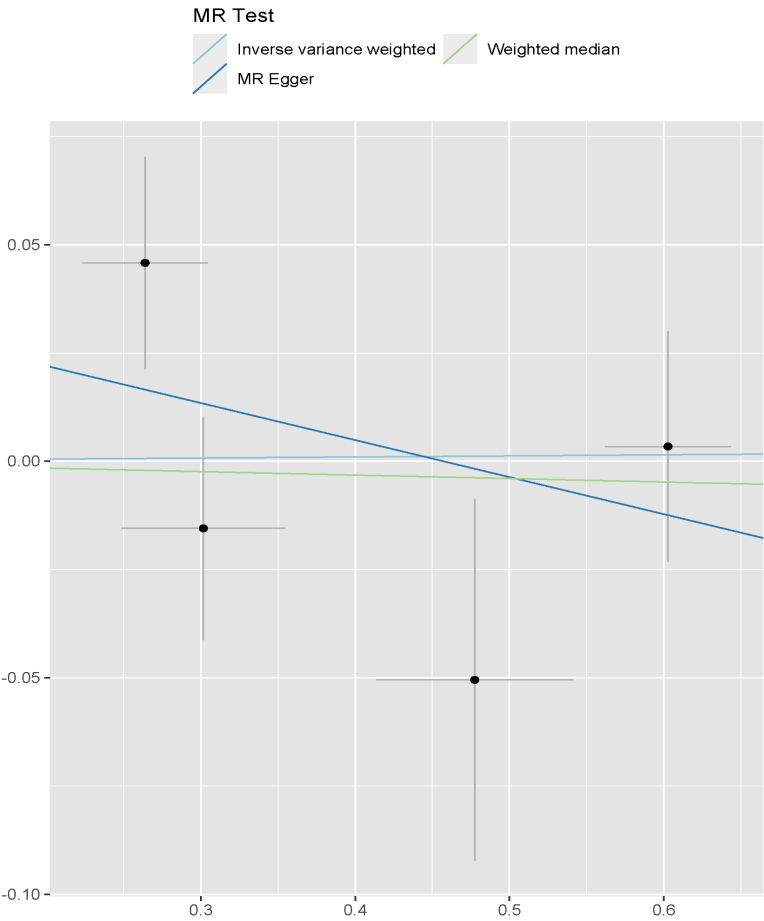

D

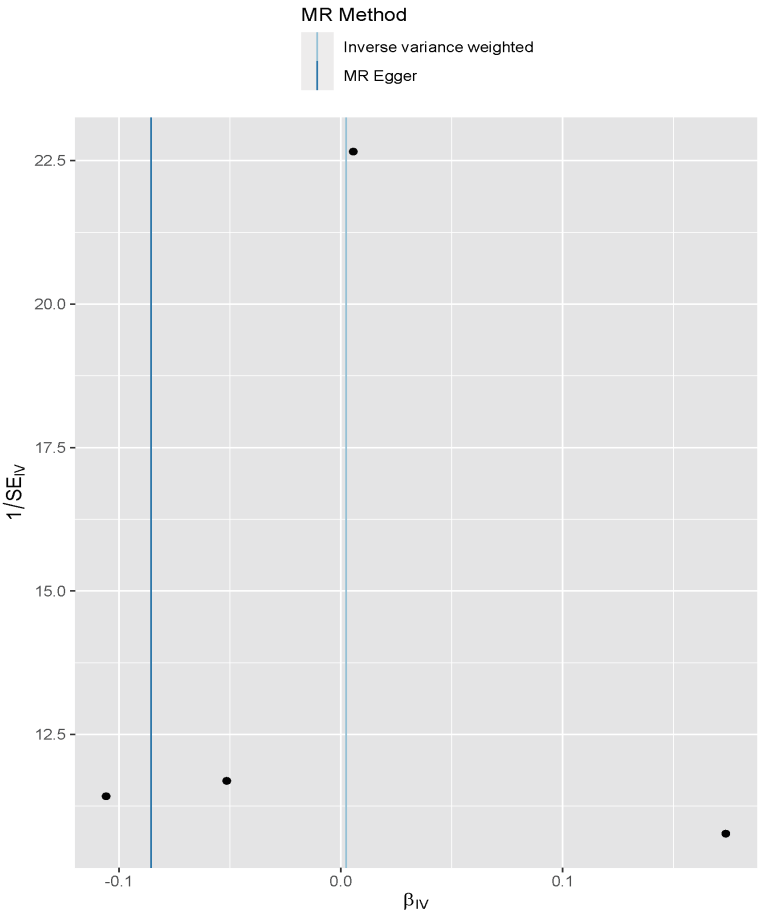

Supplementary Figure S43. Forest plot (A), Leave-one-out plot (B), scatter plot (C) and funnel plot (D) of the causal effect of NAFLD on mania.

A

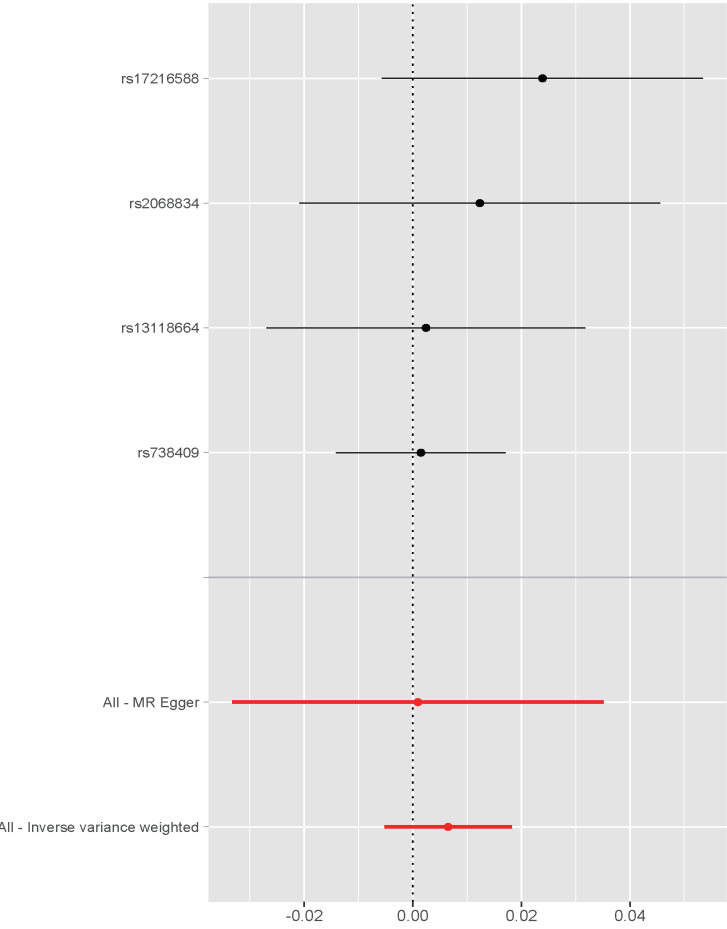

B

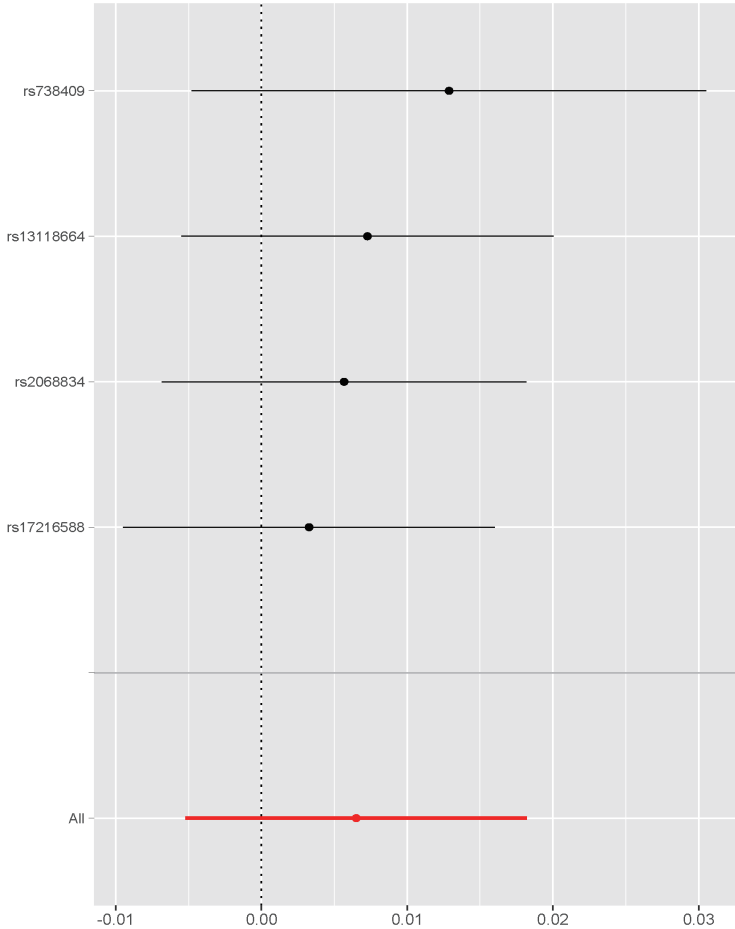

C

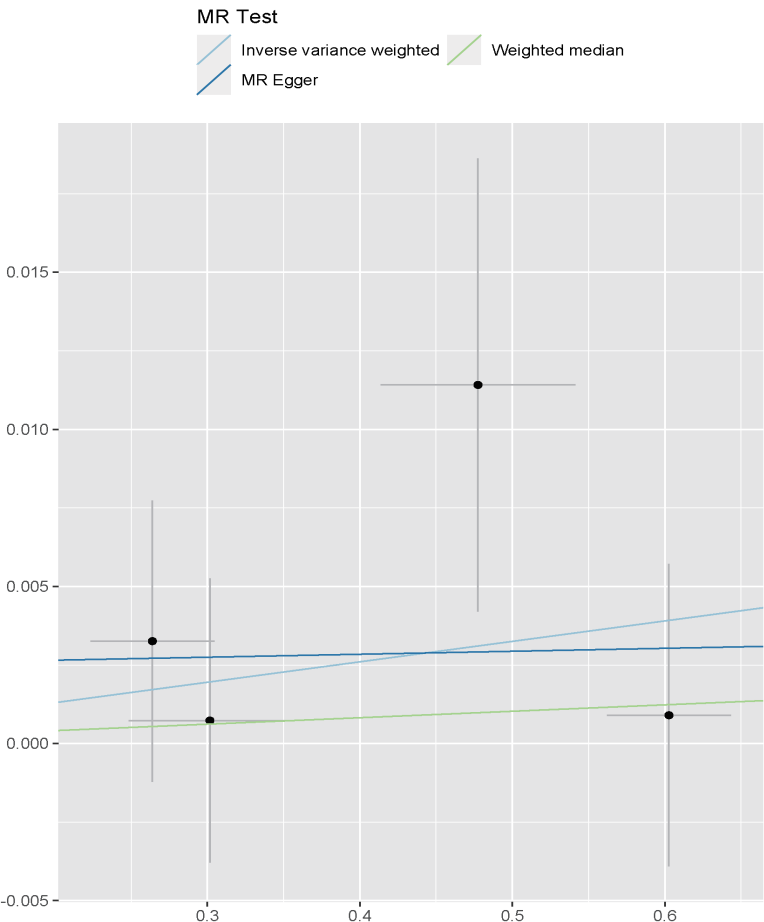

D

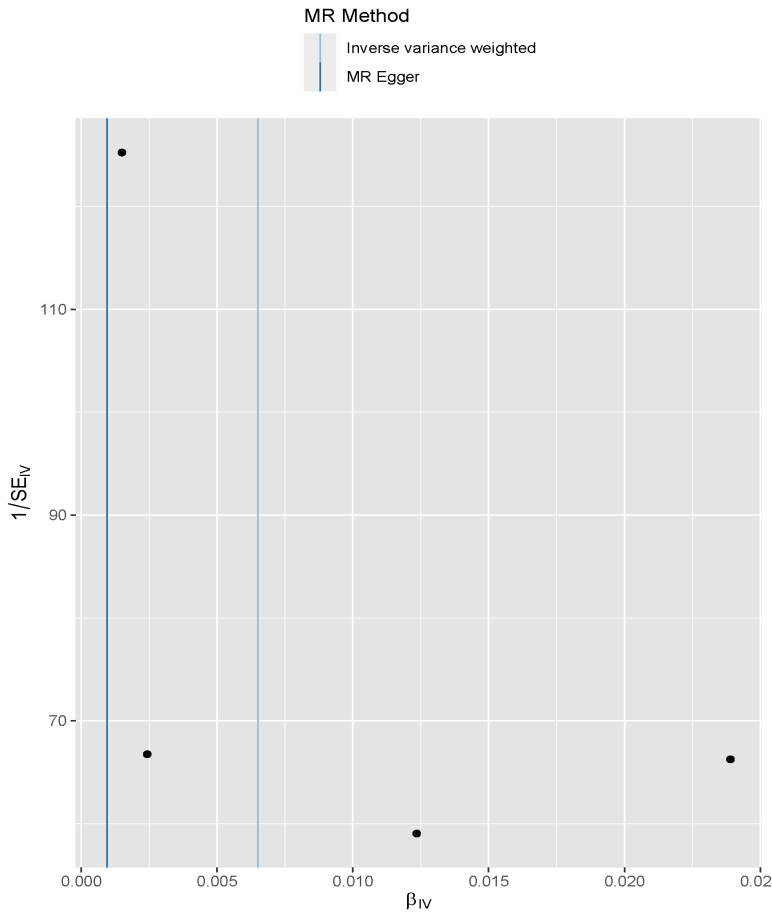

Supplementary Figure S44. Forest plot (A), Leave-one-out plot (B), scatter plot (C) and funnel plot (D) of the causal effect of NAFLD on Alzheimer's disease.

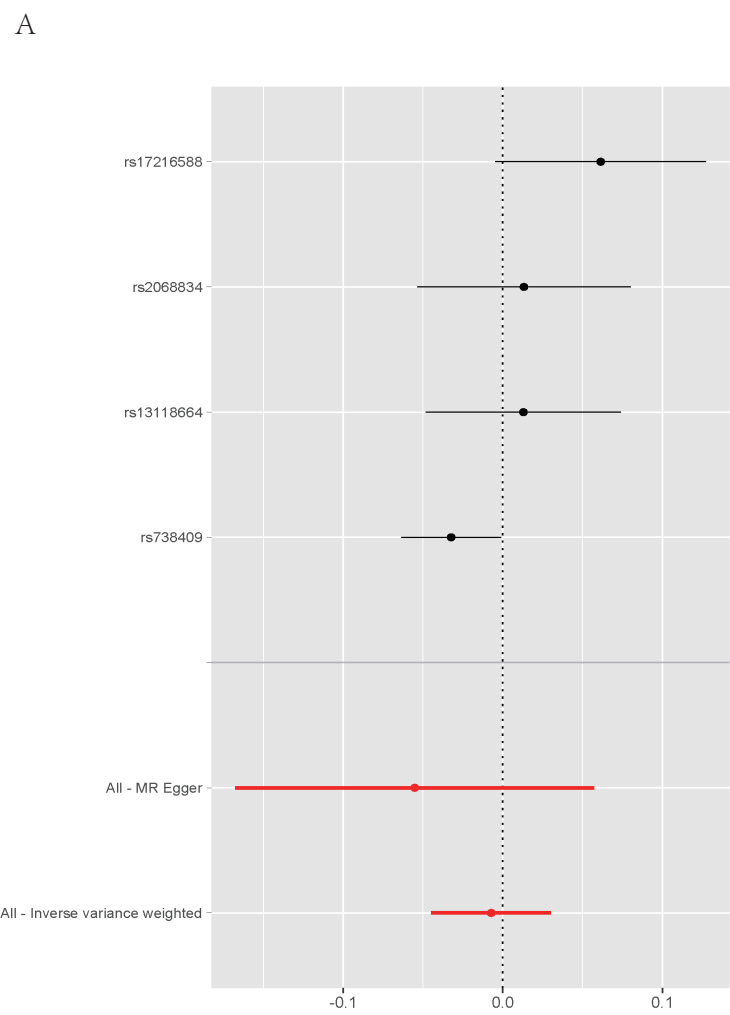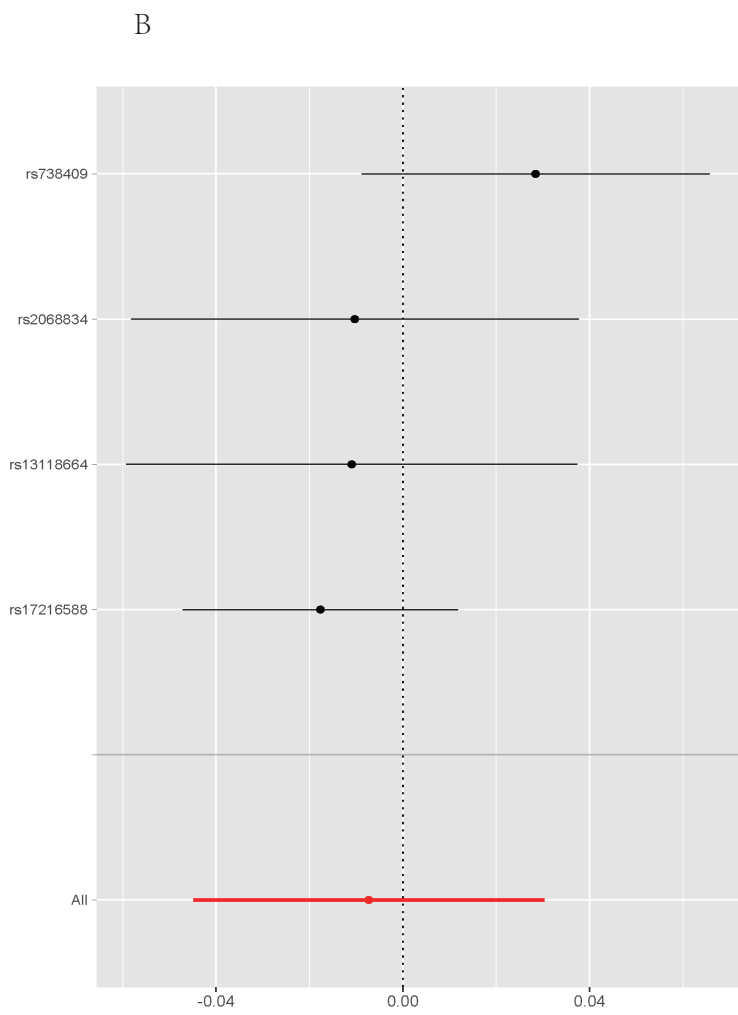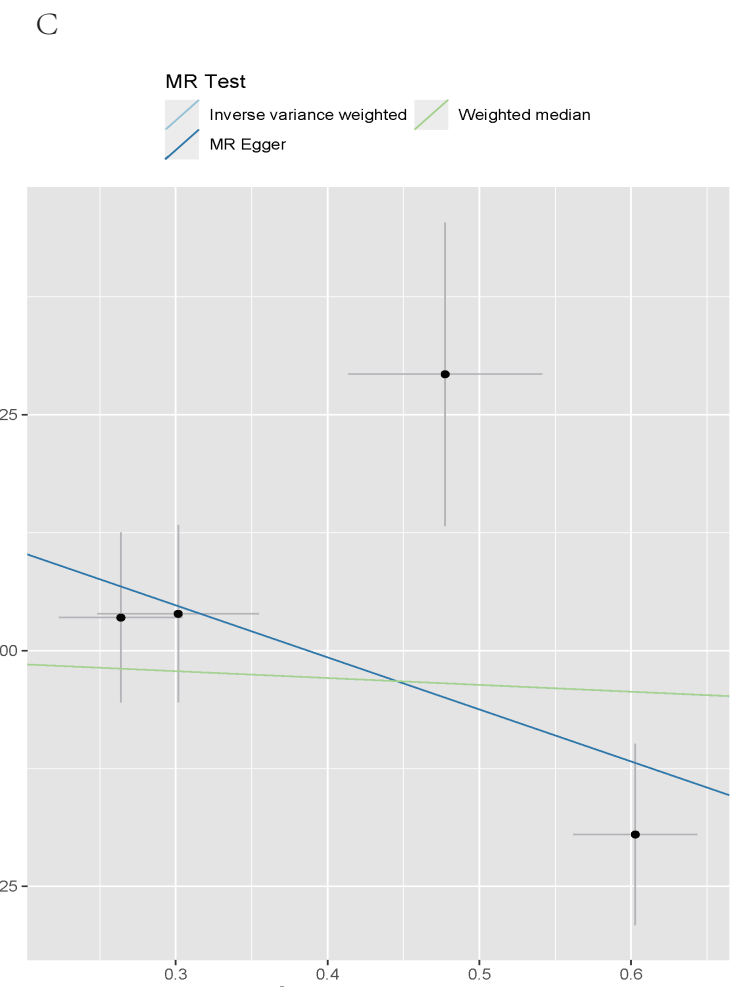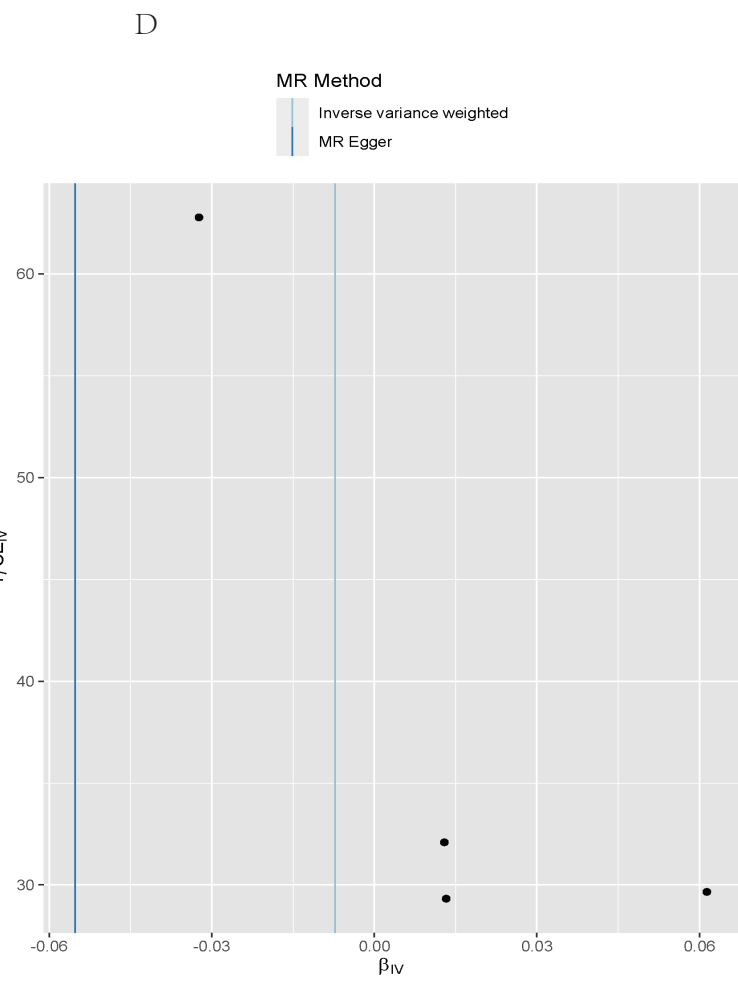



Supplementary Figure S45. Forest plot (A), Leave-one-out plot (B), scatter plot (C) and funnel plot (D) of the causal effect of NAFLD on Parkinson's disease.

A

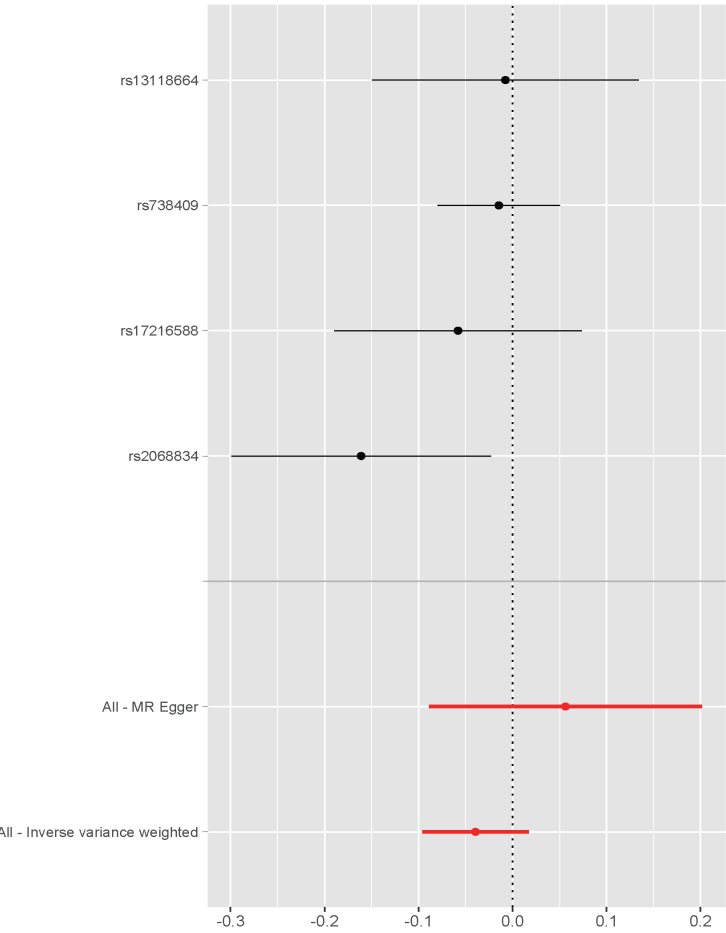

B

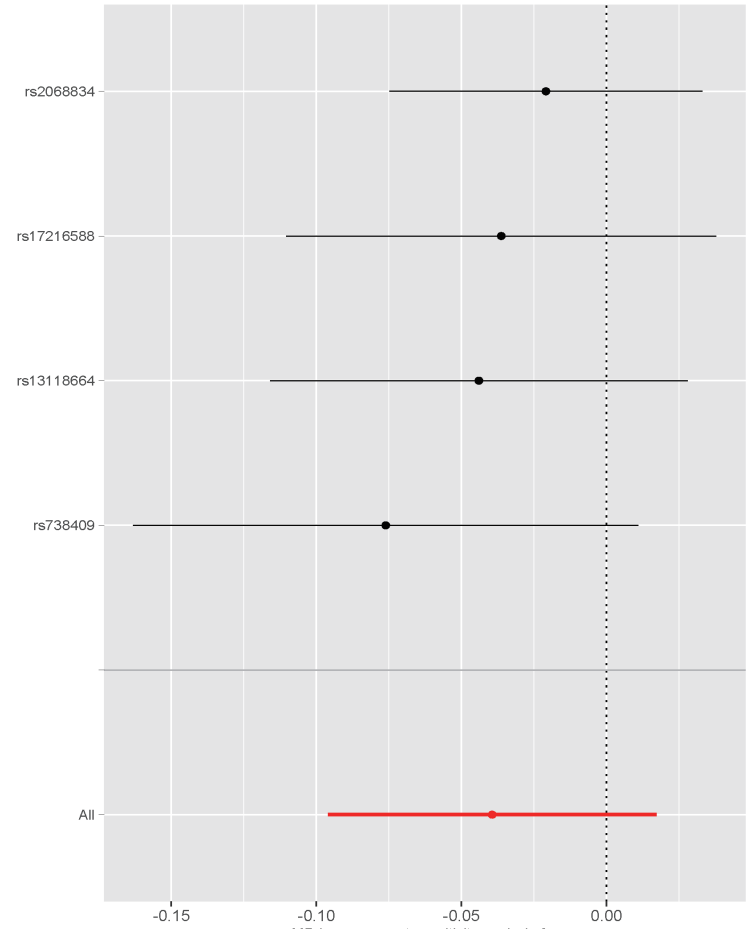

C

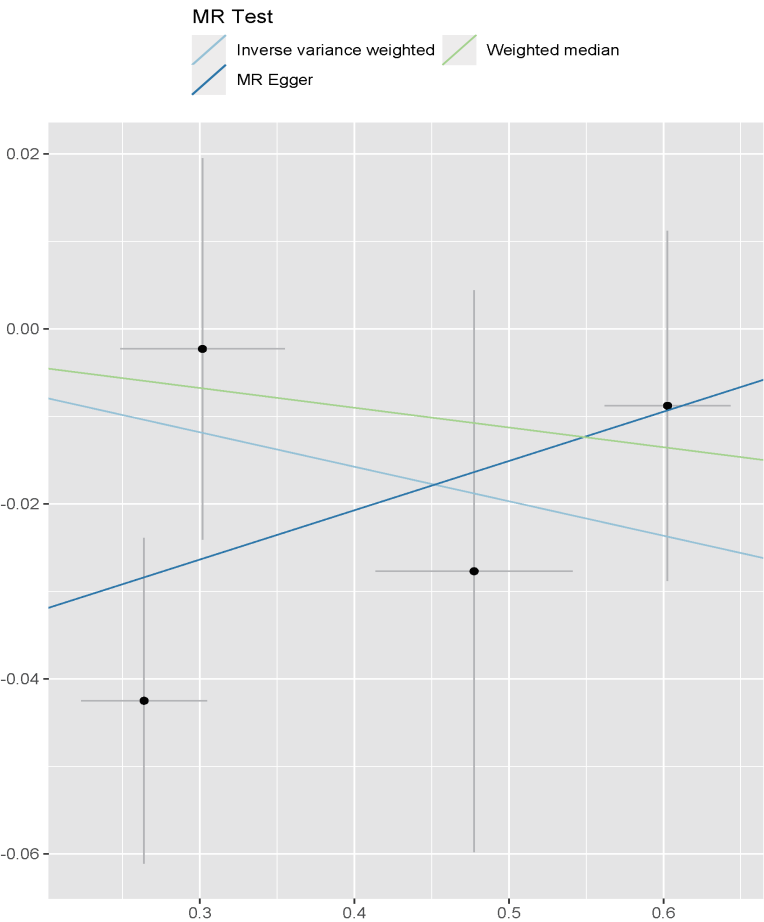

D

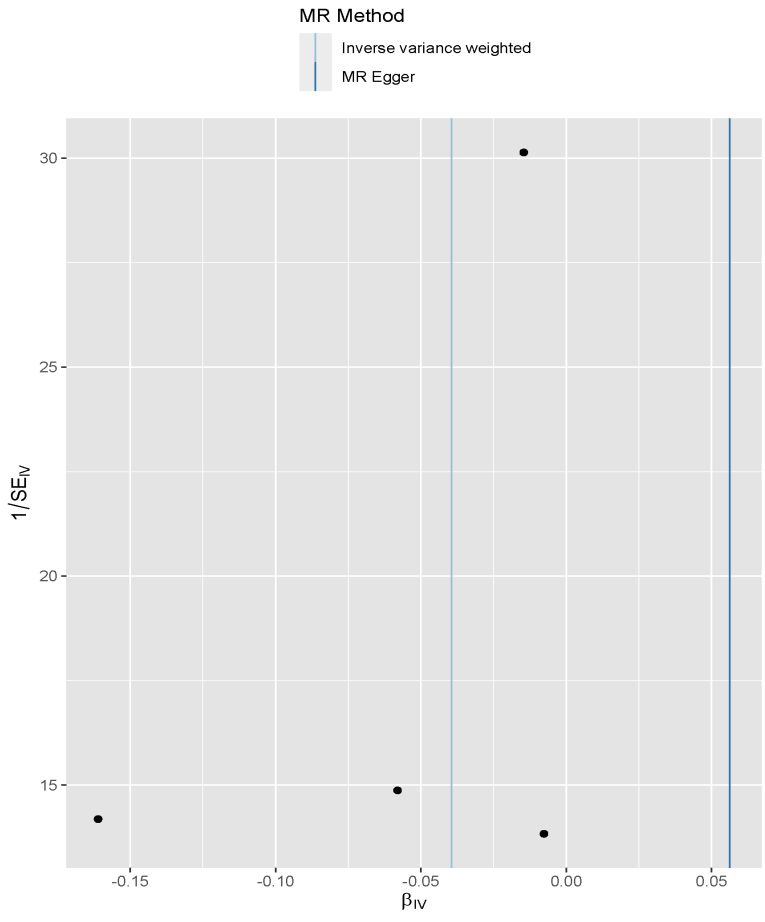

Supplementary Figure S46. Forest plot (A), Leave-one-out plot (B), scatter plot (C) and funnel plot (D) of the causal effect of NAFLD on epilepsy.

A

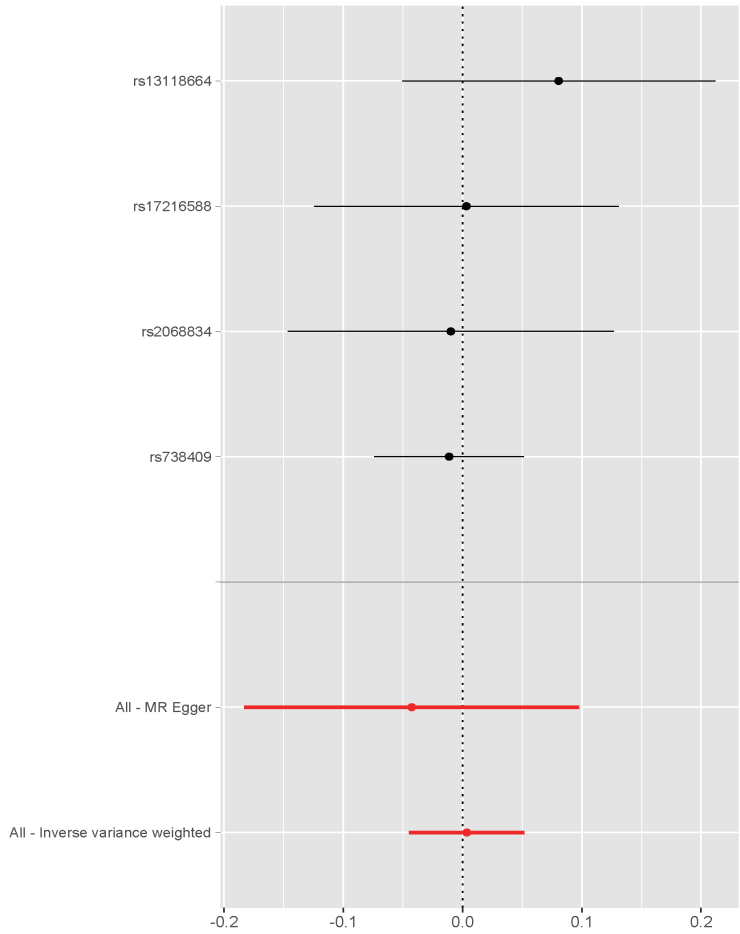

B

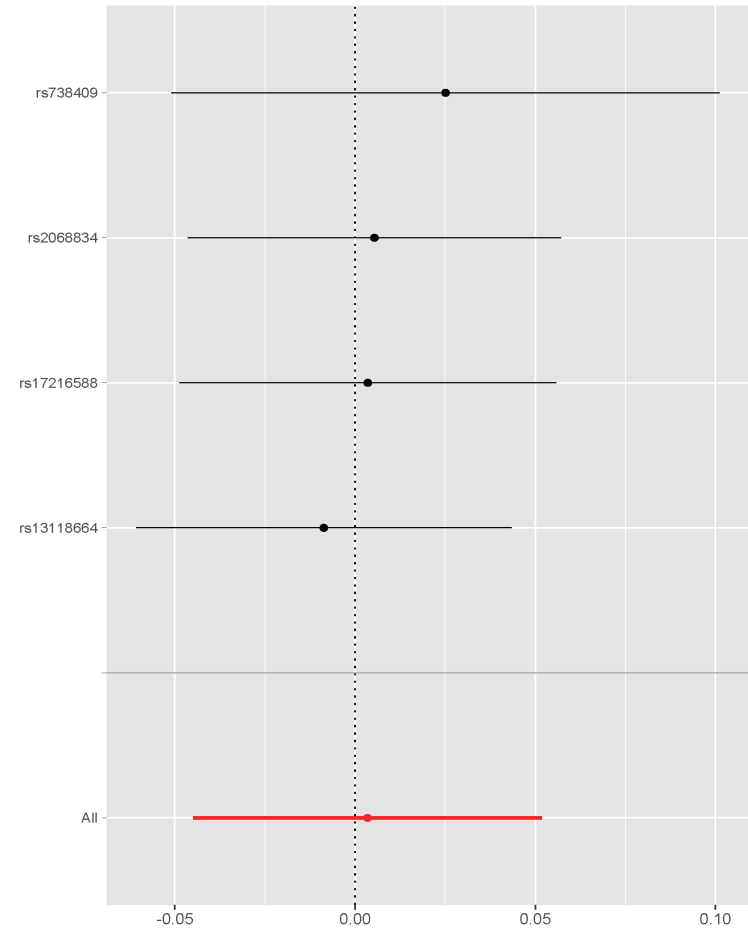

C

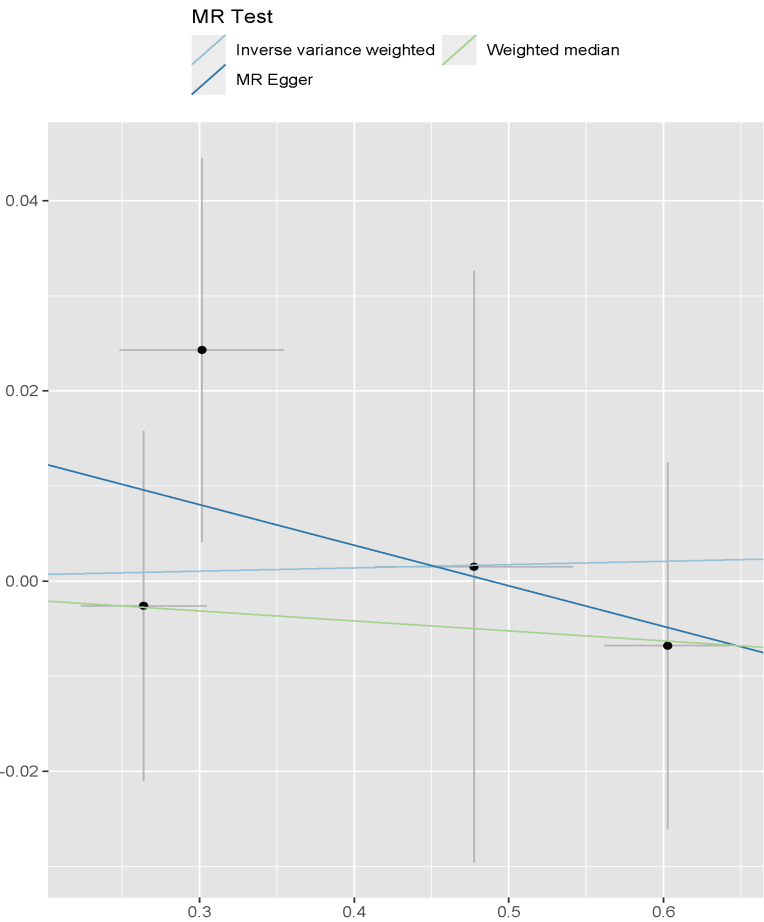

D

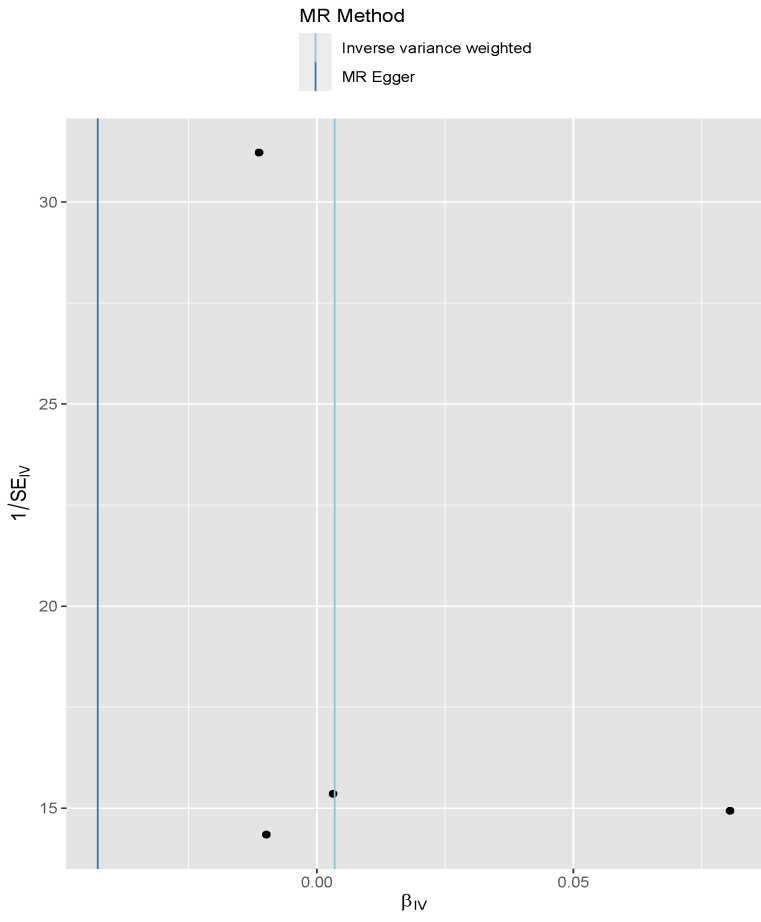

Supplementary Figure S47. Forest plot (A), Leave-one-out plot (B), scatter plot (C) and funnel plot (D) of the causal effect of NAFLD on Amyotrophic lateral sclerosis.

A

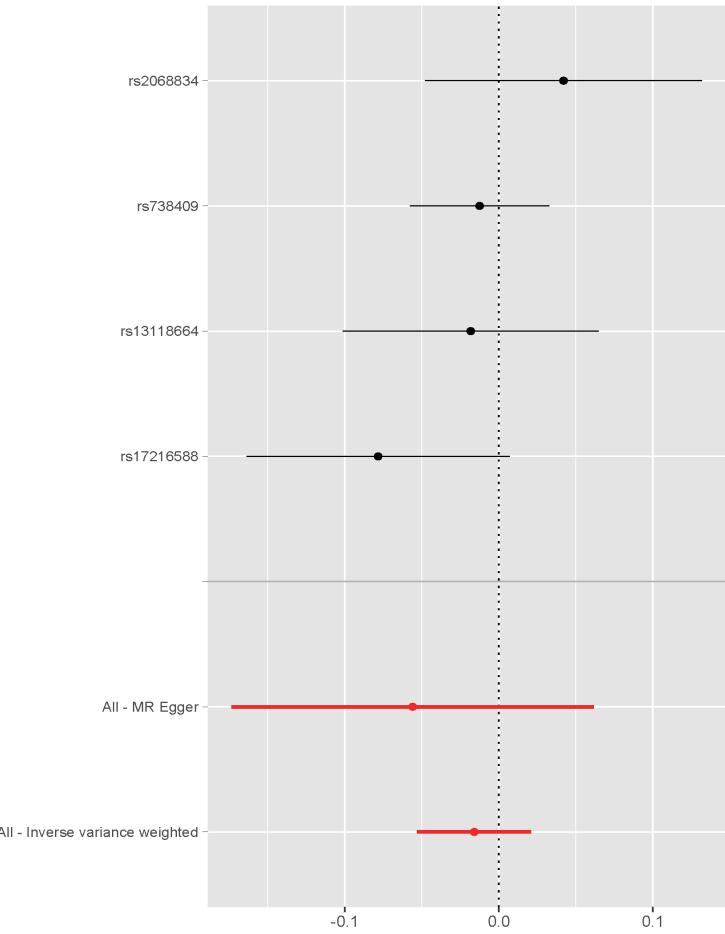

B

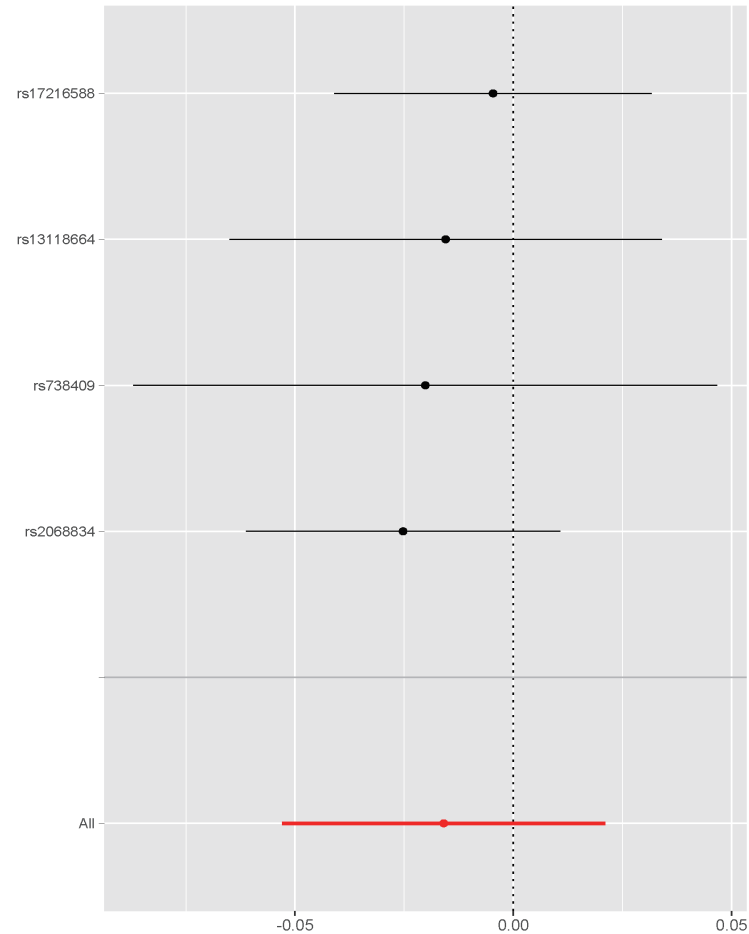

C

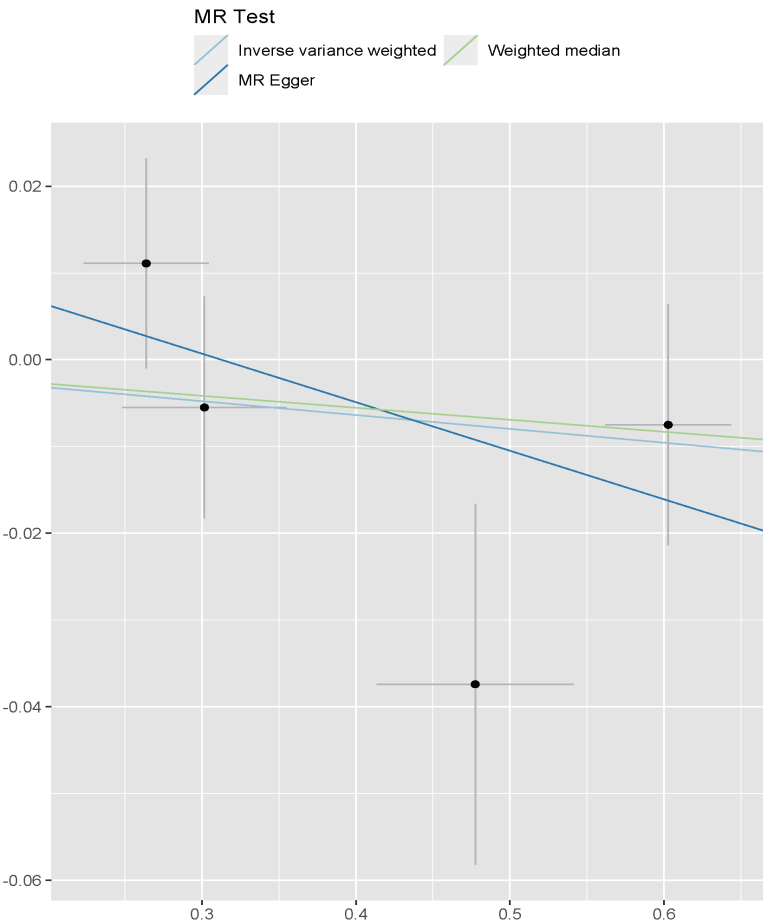

D

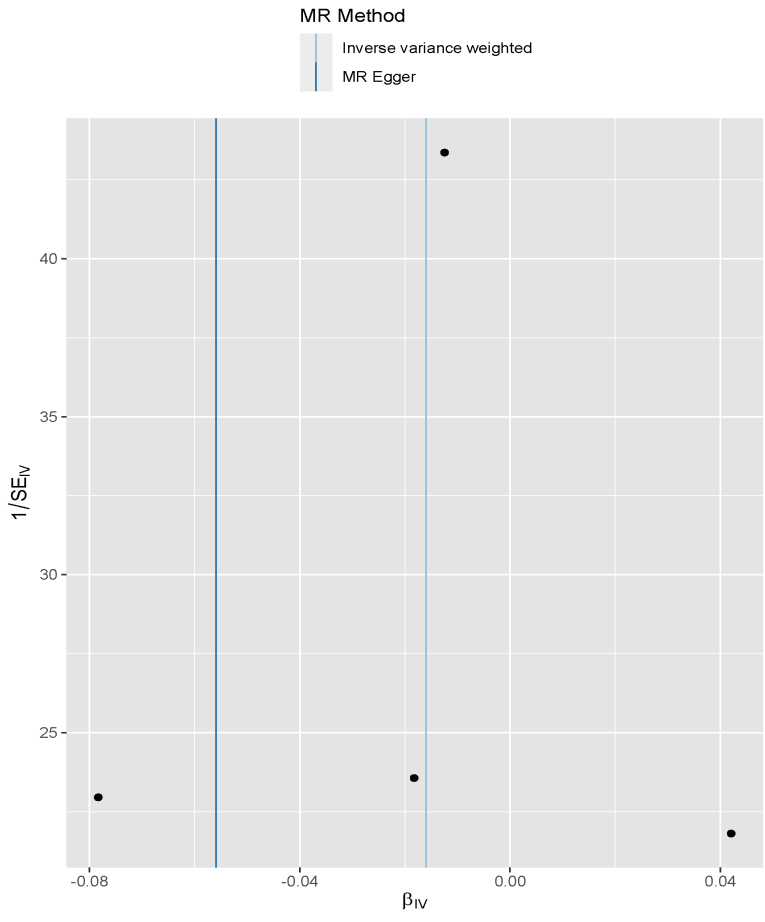

Supplementary Figure S48. Forest plot (A), Leave-one-out plot (B), scatter plot (C) and funnel plot (D) of the causal effect of NAFLD on migraine.

A

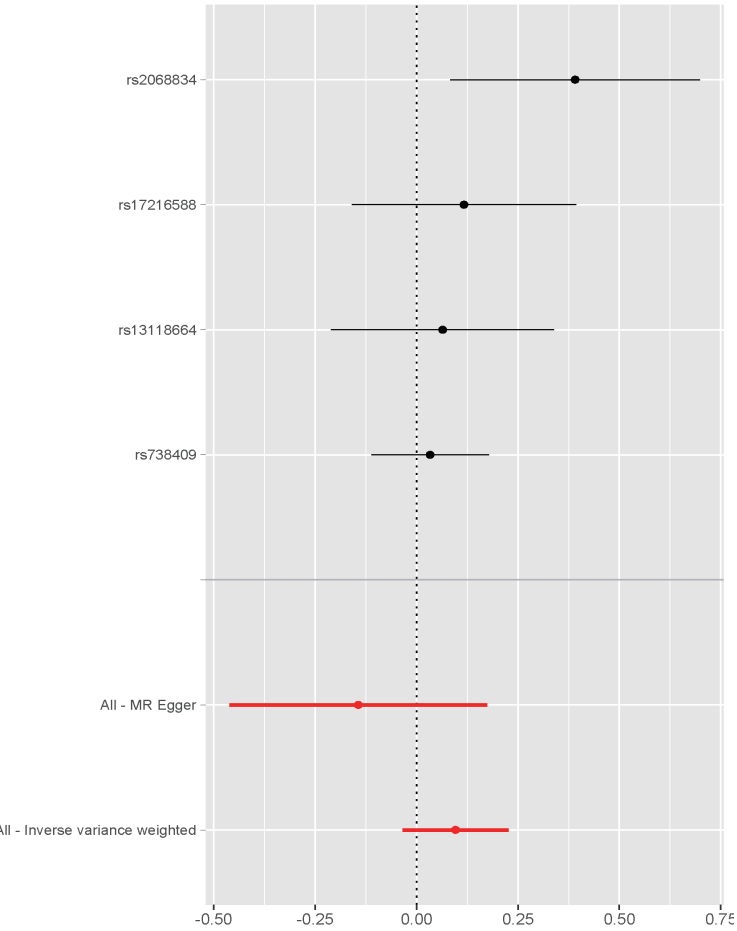

B

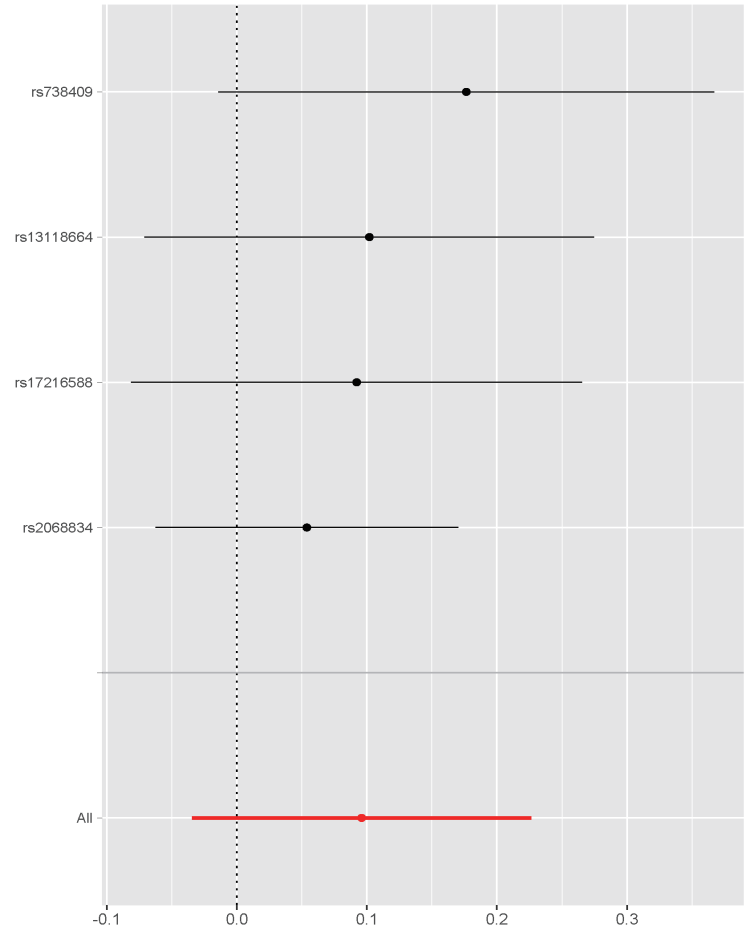

C

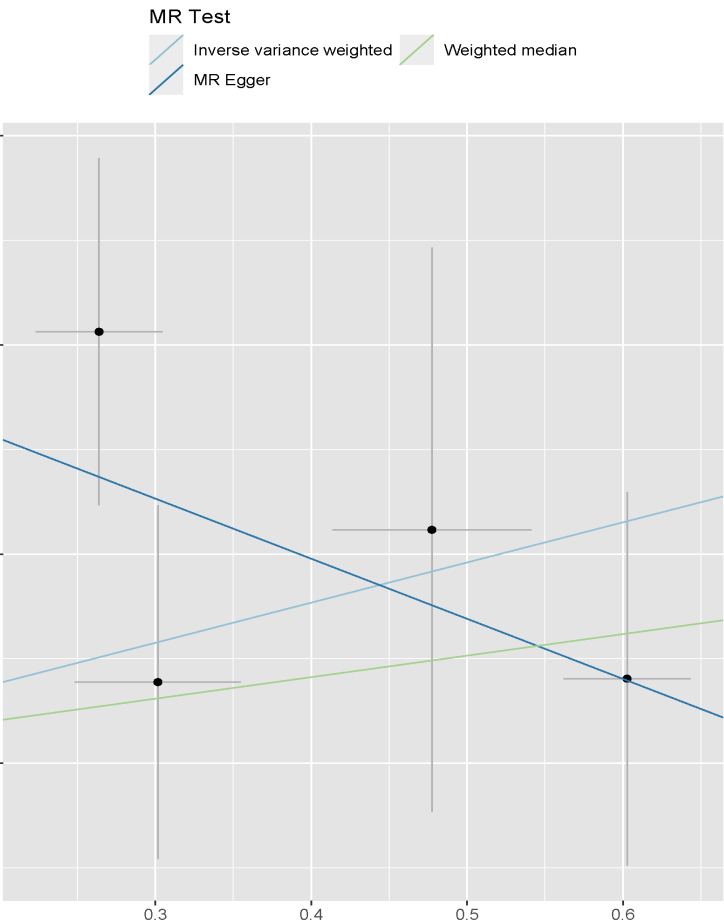

D

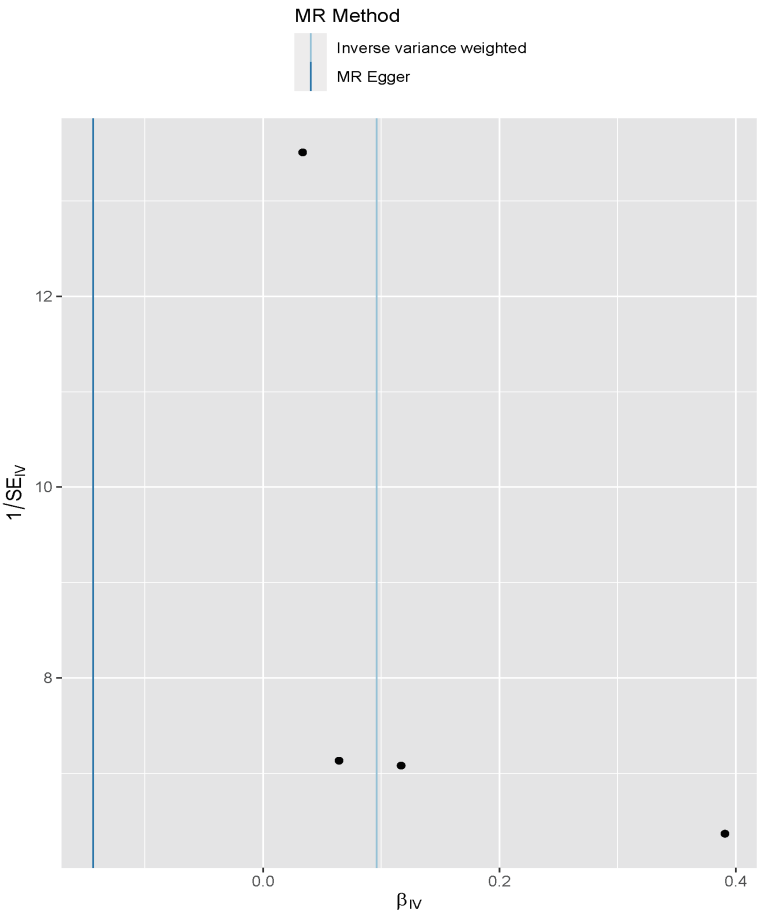

Supplement: Supplementary file 1 [file c025539fa8fd33938b3c0859.pdf]
