# Supplementary material for: Causal relationships between neuropsychiatric disorders and nonalcoholic fatty liver disease: A bidirectional Mendelian randomization study
Source: Research Square preprint supplement (doi:10.21203/rs.3.rs-3885368/v1), 2024-01-25
Supplement: Supplementary file 1 [file 0a8ae66ba804d392fe995fa7.xlsx]

## Sheet: Supplementary Table 1
Supplementary Table1. STROBE-MR checklist of recommended items to address in reports of Mendelian randomization studies
Section		Checklist item	Page No.
TITLE and ABSTRACT		Indicate Mendelian randomization (MR) as the study’s design in the title and/or the abstract if that is a main purpose of the study	Page 1, Page 3-4
INTRODUCTION
Background		Explain the scientific background and rationale for the reported study. What is the exposure? Is a potential causal relationship between exposure and outcome plausible? Justify why MR is a helpful method to address the study question	Page 5-7
Objectives		State specific objectives clearly, including pre-specified causal hypotheses (if any). State that MR is a method that, under specific assumptions, intends to estimate causal effects	Page 7
METHODS
Study design and data sources		Present key elements of the study design early in the article. Consider including a table listing sources of data for all phases of the study. For each data source contributing to the analysis, describe the following:
a)		Setting: Describe the study design and the underlying population, if possible. Describe the setting, locations, and relevant dates, including periods of recruitment, exposure, follow-up, and data collection, when available.	Not mentioned
b)		Participants: Give the eligibility criteria, and the sources and methods of selection of participants. Report the sample size, and whether any power or sample size calculations were carried out prior to the main analysis	Page 7-9, Supplementary Table 2
c)		Describe measurement, quality control and selection of genetic variants	Page 9
d)		For each exposure, outcome, and other relevant variables, describe methods of assessment and diagnostic criteria for diseases	Supplementary Table 2-4
e)		Provide details of ethics committee approval and participant informed consent, if relevant	Page 7
Assumptions		Explicitly state the three core IV assumptions for the main analysis (relevance, independence and exclusion restriction) as well assumptions for any additional or sensitivity analysis	Figure 1
Statistical methods: main analysis		Describe statistical methods and statistics used
a)		Describe how quantitative variables were handled in the analyses (i.e., scale, units, model)	Not mentioned
b)		Describe how genetic variants were handled in the analyses and, if applicable, how their weights were selected	Not mentioned
c)		Describe the MR estimator (e.g. two-stage least squares, Wald ratio) and related statistics. Detail the included covariates and, in case of two-sample MR, whether the same covariate set was used for adjustment in the two samples	Page 10-12
d)		Explain how missing data were addressed	Not mentioned
e)		If applicable, indicate how multiple testing was addressed	Page 12
Assessment of assumptions		Describe any methods or prior knowledge used to assess the assumptions or justify their validity	Page 9,13
Sensitivity analyses and additional analyses		Describe any sensitivity analyses or additional analyses performed (e.g. comparison of effect estimates from different approaches, independent replication, bias analytic techniques, validation of instruments, simulations)	Page 11-12
Software and pre- registration
a)		Name statistical software and package(s), including version and settings used	Page 12
b)		State whether the study protocol and details were pre-registered (as well as when and where)	Not mentioned
RESULTS
Descriptive data
a)		Report the numbers of individuals at each stage of included studies and reasons for exclusion. Consider use of a flow diagram	Supplementary Table 2
b)		Report summary statistics for phenotypic exposure(s), outcome(s), and other relevant variables (e.g. means, SDs, proportions)	Supplementary Table 3-4
c)		If the data sources include meta-analyses of previous studies, provide the assessments of heterogeneity across these studies	Not mentioned
d)		For two-sample MR: i. Provide justification of the similarity of the genetic variant-exposure associations between the exposure and outcome samples	Page 9; Supplementary Table 3-4
		ii. Provide information on the number of individuals who overlap between the exposure and outcome studies	Supplementary Table 2
Main results
a)		Report the associations between genetic variant and exposure, and between genetic variant and outcome, preferably on an interpretable scale	Page 13; Supplementary Table 3-4
b)		Report MR estimates of the relationship between exposure and outcome, and the measures of uncertainty from the MR analysis, on an interpretable scale, such as odds ratio or relative risk per SD difference	Page 14-16; Table 1-2 and Supplementary Table 9-10
c)		If relevant, consider translating estimates of relative risk into absolute risk for a meaningful time period	Not mentioned
d)		Consider plots to visualize results (e.g. forest plot, scatterplot of associations between genetic variants and outcome versus between genetic variants and exposure)	Figure 2-3; Supplementary Figure S1-S48
Assessment of assumptions
a)		Report the assessment of the validity of the assumptions	Supplementary Table 3-8
b)		Report any additional statistics (e.g., assessments of heterogeneity across genetic variants, such as I2, Q statistic or E-value)	Supplementary Table 5-8; Page 14-16
Sensitivity analyses and additional analyses
a)		Report any sensitivity analyses to assess the robustness of the main results to violations of the assumptions	Supplementary Table 5-8
b)		Report results from other sensitivity analyses or additional analyses	Supplementary Table 5-8
c)		Report any assessment of direction of causal relationship (e.g., bidirectional MR)	Table 1-2; Supplementary Table 6, 8 and Page 14-15
d)		When relevant, report and compare with estimates from non-MR analyses	Not mentioned
e)		Consider additional plots to visualize results (e.g., leave-one-out analyses)	Figure 2-3; Supplementary Figure S1-S48
DISCUSSION
Key results		Summarize key results with reference to study objectives	Page 16
Limitations		Discuss limitations of the study, taking into account the validity of the IV assumptions, other sources of potential bias, and imprecision. Discuss both direction and magnitude of any potential bias and any efforts to address them	Page 20-21
Interpretation
a)		Meaning: Give a cautious overall interpretation of results in the context of their limitations and in comparison with other studies	Page 16-20
b)		Mechanism: Discuss underlying biological mechanisms that could drive a potential causal relationship between the investigated exposure and the outcome, and whether the gene-environment equivalence assumption is reasonable. Use causal language carefully, clarifying that IV estimates may provide causal effects only under certain assumptions	Page 16-21
c)		Clinical relevance: Discuss whether the results have clinical or public policy relevance, and to what extent they inform effect sizes of possible interventions	Page 16-20
Generalizability		Discuss the generalizability of the study results (a) to other populations, (b) across other exposure periods/timings, and (c) across other levels of exposure	Page 20
OTHER INFORMATION
Funding		Describe sources of funding and the role of funders in the present study and, if applicable, sources of funding for the databases and original study or studies on which the present study is based	Page 1
Data and data sharing		Provide the data used to perform all analyses or report where and how the data can be accessed, and reference these sources in the article. Provide the statistical code needed to reproduce the results in the article, or report whether the code is publicly accessible and if so, where	Supplementary Table 2
Conflicts of Interest		All authors should declare all potential conflicts of interest	Page 21

## Sheet: Supplementary Table 2
Supplementary Table 2. Summary of genome-wide association studies (GWAS) datasets in the present study.
Phenotype	Sample size	ncase	ncontrol	Author, published year	Consortium	URL or PMID
Anxiety（ukb-d-20427）	35584	29129	6455	Neale lab；2018	UK Biobank	http://www.nealelab.is/uk-biobank
Schizophrenia（ieu-b-42）	77096	33640	43456	Ripke, S；2014	PGC	25056061
Post-traumatic stress disorder	174659	23212	151447	Caroline M.et al;2019	PGC	31594949
Obsessive-compulsive disorder(finn-b-F5_OCD)	199169	1059	198110	/；2021	FinnGen Biobank	https://r9.finngen.fi/
Major Depressive Disorder	807553	246363	561190	Howard DM;2019	PGC	30718901
Bipolar disorder（ebi-a-GCST003724）	34950	7647	27303	Hou L；2016	/	27329760
Mania(ukb-d-20493)	26655	7988	18667	Neale lab;2018	UK Biobank	http://www.nealelab.is/uk-biobank
Alzheimer's disease（ebi-a-GCST90027158）	487511	39106	46828	Bellenguez C；2022	/	35379992
Parkinson's disease（ieu-b-7）	482730	33674	449056	Nalls MA；2019	International Parkinson's Disease Genomics Consortium	31701892
Epilepsy（ebi-a-GCST90018840）	458310	4382	453928	Sakaue S；2021	/	34594039
Amyotrophic lateral sclerosis(ebi-a-GCST90027164)	138086	27205	110881	van Rheenen W;2021	/	34873335
Migraine	456348	1488	454860	Jiang L;2021	/	34737426
Non-alcoholic fatty liver disease	778614	8434	770180	Ghodsian N；2021	/	34841290
Non-alcoholic fatty liver disease	19264	1483	17781	Anstee QM.et al;2020	European tertiary liver centers	32298765

## Sheet: Supplementary Table 3
Supplementary Table 3. Detailed information of instrumental variables used in MR analyses discovery stage
Trait	SNP	Chr	Pos	effect_allele	other_allele	Exposure				Outcome
						β	SE	P-value	F-statistic	β	SE	P-value
Anxiety	rs113736886	19	46314759	A	G	-0.0543047	0.0104319	1.94406e-07	27.0987	-0.0300013	0.0573506	0.6009
Anxiety	rs12123967	1	207205646	C	T	-0.0578796	0.0123061	2.56921e-06	22.1213	0.0192844	0.0763247	0.8005
Anxiety	rs12412747	10	99649531	A	G	-0.0142207	0.00310353	4.61913e-06	20.9957	0.0225638	0.0179713	0.2093
Anxiety	rs12499508	4	173509856	A	G	0.0144009	0.00286714	5.11894e-07	25.2279	0.0324162	0.0164102	0.0482303
Anxiety	rs12793245	11	28293590	C	G	0.0218026	0.00450324	1.29372e-06	23.4405	-0.0043798	0.0241499	0.8561
Anxiety	rs2095926	10	84988003	T	C	0.0208063	0.00414052	5.05755e-07	25.2511	0.0020975	0.0251965	0.9337
Anxiety	rs56217471	1	164547894	G	C	0.036435	0.00781009	3.09571e-06	21.7633	0.0659374	0.0523991	0.2083
Anxiety	rs78205487	8	26140288	A	C	-0.0142753	0.00299226	1.84289e-06	22.76	0.0252544	0.0168336	0.1336
Anxiety	rs79790224	9	4435261	G	T	0.0333643	0.00710785	2.689e-06	22.0337	0.0080499	0.0375272	0.8302
Schizophrenia	rs10108725	8	4191202	T	C	0.073204	0.0133	3.31597e-08	30.2947	-0.0348184	0.0190609	0.0677501
Schizophrenia	rs1024582	12	2402246	G	A	-0.098904	0.0115	6.26614e-18	73.966	-0.0198267	0.0168769	0.2401
Schizophrenia	rs10791097	11	130718630	G	T	-0.0766	0.0109	2.04597e-12	49.3861	0.0038126	0.0162759	0.8148
Schizophrenia	rs11027857	11	24403620	A	G	0.063998	0.0109	3.67096e-09	34.4731	0.0121558	0.01631	0.4561
Schizophrenia	rs1106568	4	176861301	A	G	-0.069404	0.0125	2.84898e-08	30.8283	0.0102266	0.0194938	0.5999
Schizophrenia	rs111294930	5	152177121	G	A	-0.087699	0.0143	9.28795e-10	37.6112	-0.00237	0.0181428	0.8961
Schizophrenia	rs11139497	9	84739941	A	T	0.0656	0.0118	2.64801e-08	30.9061	0.0196081	0.0179865	0.2756
Schizophrenia	rs11191419	10	104612335	A	T	-0.101601	0.0118	6.6896e-18	74.1365	-0.013033	0.0168416	0.439
Schizophrenia	rs11210892	1	44100084	A	G	-0.067797	0.0115	3.41696e-09	34.7556	0.0038944	0.017646	0.8253
Schizophrenia	rs11658257	17	17958402	C	G	-0.066204	0.0115	8.33892e-09	33.1415	-0.0325809	0.0171419	0.0573495
Schizophrenia	rs11682175	2	57987593	C	T	0.073496	0.0109	1.57906e-11	45.4647	0.0218505	0.0163418	0.1812
Schizophrenia	rs11693094	2	185601420	T	C	-0.073603	0.011	2.1722e-11	44.7719	-0.0008337	0.0162915	0.9592
Schizophrenia	rs117074560	6	96459651	T	C	-0.156595	0.0277	1.661e-08	31.9592	-0.0822033	0.0381707	0.0312702
Schizophrenia	rs11740474	5	153680747	T	A	0.062695	0.0112	1.99802e-08	31.335	-5.65e-05	0.0164985	0.9973
Schizophrenia	rs1191551	14	30000405	G	T	-0.071697	0.0131	4.20804e-08	29.9543	-0.0001871	0.0189446	0.9921
Schizophrenia	rs12062861	1	150026544	A	G	-0.091096	0.0149	9.66095e-10	37.3789	0.0206679	0.0217863	0.3428
Schizophrenia	rs1233578	6	28712247	G	A	-0.196397	0.0164	6.16879e-33	143.411	-0.0616242	0.0290952	0.0341704
Schizophrenia	rs12691307	16	29939877	G	A	-0.071902	0.0113	2.031e-10	40.4879	-0.0030736	0.016493	0.8522
Schizophrenia	rs12704290	7	86427626	A	G	-0.106105	0.0168	2.59102e-10	39.889	-0.0037323	0.0236289	0.8745
Schizophrenia	rs12826178	12	57622371	T	G	-0.168206	0.0244	5.69902e-12	47.5229	0.015528	0.029665	0.600701
Schizophrenia	rs12887734	14	104061284	T	G	0.088304	0.0121	3.71878e-13	53.2586	0.0084036	0.0172175	0.6255
Schizophrenia	rs12932476	16	63709630	G	C	-0.059702	0.0109	4.61902e-08	30.0002	0.0087397	0.0162534	0.590799
Schizophrenia	rs13240464	7	110898915	C	T	-0.080704	0.0116	3.11889e-12	48.4032	0.0005484	0.0172547	0.9746
Schizophrenia	rs13261481	8	60706091	G	T	-0.062402	0.011	1.66299e-08	32.1819	0.0155308	0.0163632	0.3426
Schizophrenia	rs1339227	6	73157926	T	C	-0.063302	0.0114	3.05598e-08	30.8337	0.0224988	0.0165049	0.1728
Schizophrenia	rs1498232	1	30433951	C	T	-0.072004	0.0118	1.20601e-09	37.2348	0.0024908	0.0182932	0.8917
Schizophrenia	rs1509378	2	22754466	G	A	-0.0692	0.0119	5.39002e-09	33.8157	-0.0309365	0.0171875	0.0718704
Schizophrenia	rs1615350	12	123650335	T	C	-0.0851	0.0123	4.25893e-12	47.8684	0.0164139	0.0194056	0.3976
Schizophrenia	rs16867576	5	88746331	G	A	-0.095801	0.017	1.60498e-08	31.7572	0.0012291	0.0250377	0.9608
Schizophrenia	rs1702294	1	98501984	C	T	0.118401	0.0138	1.02707e-17	73.6127	-0.0252642	0.0194738	0.1945
Schizophrenia	rs17108967	14	71542168	C	T	0.065296	0.0115	1.214e-08	32.2387	0.0256007	0.0173804	0.1408
Schizophrenia	rs17194490	3	2547786	T	G	0.0966	0.0148	6.37676e-11	42.6021	-0.0212283	0.0225934	0.3474
Schizophrenia	rs2053079	19	30987423	G	A	0.071797	0.0127	1.735e-08	31.9599	-0.0228135	0.0189526	0.2287
Schizophrenia	rs2103655	20	37425958	A	G	0.0766	0.0119	1.236e-10	41.4346	-0.018197	0.0175803	0.3006
Schizophrenia	rs215411	4	23423603	A	T	0.0692	0.0115	1.67699e-09	36.209	-0.0080643	0.0169335	0.6339
Schizophrenia	rs2332700	14	72417326	G	C	-0.0771	0.0125	7.38006e-10	38.0442	0.0106101	0.0182261	0.5605
Schizophrenia	rs2414718	15	61863133	A	G	0.069797	0.011	1.97802e-10	40.2613	0.0064379	0.0163363	0.693499
Schizophrenia	rs2514218	11	113392994	T	C	-0.072205	0.0116	4.64398e-10	38.7453	-0.0392383	0.0179248	0.0285897
Schizophrenia	rs2535627	3	52845105	C	T	-0.070403	0.0109	1.16899e-10	41.7186	0.0319742	0.0162399	0.04897
Schizophrenia	rs2693698	14	99719219	G	A	0.061705	0.0111	2.98696e-08	30.9026	0.0107608	0.0163295	0.5099
Schizophrenia	rs28681284	15	78908565	T	C	-0.101601	0.0141	6.34746e-13	51.9228	-0.0183283	0.0193576	0.3437
Schizophrenia	rs301797	1	8487323	A	C	0.066097	0.0116	1.20199e-08	32.4674	-0.0127472	0.0172139	0.459
Schizophrenia	rs34796896	3	180625961	A	G	-0.082198	0.0135	1.22899e-09	37.0728	0.0288035	0.0202394	0.1547
Schizophrenia	rs35225200	4	103146888	C	A	0.144795	0.0203	9.56093e-13	50.8762	0.0689211	0.0349144	0.0483805
Schizophrenia	rs35324223	11	46402852	G	A	0.091995	0.0145	2.04099e-10	40.2525	0.024834	0.0221311	0.2618
Schizophrenia	rs35998080	1	73278615	T	G	0.069004	0.0112	6.95296e-10	37.9588	-0.0210714	0.0163363	0.1971
Schizophrenia	rs36068923	8	111485761	G	A	0.083501	0.0134	4.13504e-10	38.8306	-0.001683	0.0206646	0.9351
Schizophrenia	rs3798869	6	84328660	A	G	-0.066802	0.011	1.085e-09	36.8802	-0.006533	0.0162839	0.6883
Schizophrenia	rs3849046	5	137851192	T	C	0.062496	0.0109	1.036e-08	32.8739	0.0311389	0.016585	0.0604394
Schizophrenia	rs4129585	8	143312933	C	A	-0.079301	0.0109	3.61327e-13	52.9303	-0.0182358	0.0164013	0.2662
Schizophrenia	rs4391122	5	60598543	G	A	0.078005	0.0109	8.9043e-13	51.2144	-0.003313	0.0162251	0.8382
Schizophrenia	rs4523957	17	2208899	T	G	0.069703	0.0115	1.39801e-09	36.7373	0.0367047	0.0168096	0.0290001
Schizophrenia	rs4648845	1	2387101	T	C	0.067201	0.0119	1.737e-08	31.8902	0.0109654	0.0164907	0.5061
Schizophrenia	rs4702	15	91426560	A	G	-0.080505	0.0115	2.62422e-12	49.0061	-0.0180086	0.0169761	0.2888
Schizophrenia	rs4766428	12	110723245	T	C	0.069395	0.0112	6.11604e-10	38.3902	-0.0109796	0.0163053	0.5007
Schizophrenia	rs55775495	2	198245965	T	C	-0.068996	0.0114	1.55801e-09	36.6301	0.0045212	0.0167442	0.7871
Schizophrenia	rs58120505	7	2029867	C	T	-0.082197	0.0111	1.25603e-13	54.836	0.0216066	0.0166281	0.1938
Schizophrenia	rs5995756	22	40000313	C	T	-0.072497	0.0109	2.91273e-11	44.2371	-0.0156691	0.0162828	0.3359
Schizophrenia	rs6439649	3	136371691	T	G	0.070999	0.0111	1.37e-10	40.9127	-0.0173395	0.0163522	0.289
Schizophrenia	rs6704768	2	233592501	A	G	-0.0766	0.0109	2.063e-12	49.3861	0.0045069	0.0162964	0.782099
Schizophrenia	rs72986630	19	11849736	T	C	0.1459	0.0266	4.12401e-08	30.0848	-0.0356702	0.0334649	0.2865
Schizophrenia	rs73036062	11	133828187	A	G	-0.089104	0.0135	3.68214e-11	43.5639	-0.0083759	0.0189931	0.6592
Schizophrenia	rs73191547	8	10033425	T	A	0.066899	0.0115	6.12604e-09	33.841	0.0096793	0.0185242	0.6013
Schizophrenia	rs73229090	8	27442127	A	C	-0.0995	0.0177	1.952e-08	31.6009	-0.0186028	0.0257106	0.4693
Schizophrenia	rs75968099	3	36858583	T	C	0.080104	0.0114	2.311e-12	49.374	-0.0105002	0.0170188	0.5373
Schizophrenia	rs7601312	2	229320093	G	A	0.058997	0.0108	4.67498e-08	29.8409	-0.0308528	0.0162162	0.05709
Schizophrenia	rs760648	22	42571028	A	G	0.075803	0.0118	1.274e-10	41.2676	-0.0068551	0.0164218	0.676401
Schizophrenia	rs76355118	2	149412005	G	A	0.154399	0.0278	2.77703e-08	30.846	0.0632275	0.0420735	0.1329
Schizophrenia	rs7801375	7	131567263	G	A	0.083001	0.015	2.88297e-08	30.6185	-0.0068054	0.0235209	0.7723
Schizophrenia	rs7819570	8	89596484	T	G	0.076498	0.014	4.47404e-08	29.8569	0.0175342	0.0206237	0.3952
Schizophrenia	rs783540	15	83278750	G	A	0.059899	0.011	4.772e-08	29.652	-0.0289983	0.0168763	0.0857492
Schizophrenia	rs7893279	10	18745105	G	T	-0.1124	0.0175	1.24099e-10	41.2531	0.0009333	0.0246083	0.9697
Schizophrenia	rs8055219	16	13753384	A	G	0.076998	0.0127	1.44601e-09	36.758	-0.0203026	0.0189702	0.2845
Schizophrenia	rs832190	3	63842629	T	C	-0.069897	0.0113	5.73099e-10	38.2613	0.0164863	0.016759	0.3252
Schizophrenia	rs9636107	18	53200117	G	A	0.079595	0.0108	2.1742e-13	54.3155	-0.0160798	0.0162353	0.322
PTSD	rs1136201	17	37879588	A	G	-0.0804999	0.0171	2.50655e-06	22.1615	0.0083376	0.0183189	0.649
PTSD	rs117405401	12	131769084	A	G	0.255897	0.0553	3.70219e-06	21.4132	-0.047767	0.0468555	0.308
PTSD	rs12706983	7	131337495	T	G	-0.0895998	0.0192	3.0614e-06	21.7777	-0.0092951	0.0186334	0.6179
PTSD	rs139591016	4	99816170	T	C	-0.2489	0.0532	2.88883e-06	21.889	0.0809264	0.0562197	0.15
PTSD	rs1444764	3	123929043	A	G	0.0780993	0.0164	1.9154e-06	22.6781	-0.0117758	0.0179609	0.5121
PTSD	rs149509653	11	118558425	A	G	0.0904986	0.0189	1.68211e-06	22.9277	0.0046976	0.0218724	0.8299
PTSD	rs17041470	12	102430430	A	G	-0.2981	0.0644	3.67641e-06	21.4266	0.029289	0.0478296	0.5403
PTSD	rs17108326	14	72628507	A	G	0.105998	0.0209	3.94299e-07	25.722	0.0005912	0.024833	0.981
PTSD	rs2163050	2	41826738	A	G	0.0999992	0.0211	2.14461e-06	22.4609	0.0019097	0.0234126	0.935
PTSD	rs34517852	6	157796068	A	T	0.1095	0.0185	3.24071e-09	35.0336	0.0076388	0.017192	0.6568
PTSD	rs35334143	20	47530708	C	G	-0.0797003	0.0171	3.14923e-06	21.7234	-0.0017979	0.0187228	0.9235
PTSD	rs36127550	12	133780309	T	G	-0.1027	0.0204	4.79611e-07	25.3441	-0.010201	0.0222362	0.646399
PTSD	rs73154700	22	31266823	A	G	0.125998	0.0272	3.61656e-06	21.458	-0.0472668	0.0311597	0.1293
PTSD	rs763753	6	162168506	A	G	-0.114	0.0221	2.49111e-07	26.6088	0.0275387	0.0244473	0.26
PTSD	rs77537694	11	132725161	A	G	0.130203	0.028	3.31742e-06	21.6236	0.0279954	0.0336778	0.4058
PTSD	rs7807190	7	1851461	A	G	0.0834032	0.0181	4.06733e-06	21.2329	0.0136264	0.0188623	0.47
PTSD	rs78608260	19	53637559	A	G	-0.3214	0.0694	3.63681e-06	21.4473	-0.166123	0.0614766	0.00688795
OCD	rs10417062	19	47033691	A	G	-0.2088	0.0454	4.30695e-06	21.1519	-0.004306	0.016374	0.7926
OCD	rs114579897	5	83946735	T	G	0.7186	0.1483	1.25901e-06	23.4797	-0.0271051	0.0668844	0.6853
OCD	rs115217909	4	184486097	T	C	0.3994	0.0842	2.121e-06	22.5005	-0.0298146	0.0336699	0.3759
OCD	rs12195424	6	56298722	A	G	0.328	0.0717	4.79899e-06	20.9271	0.0063222	0.0245079	0.7964
OCD	rs12601601	17	77869436	C	G	0.2995	0.065	4.12696e-06	21.2308	0.0038559	0.0264849	0.8842
OCD	rs12794942	11	111113885	T	C	-0.3002	0.0651	4.02698e-06	21.2647	-0.0071777	0.0215677	0.739301
OCD	rs13070807	3	56847945	G	C	0.2141	0.0459	3.14203e-06	21.7574	-0.0163079	0.0168157	0.3321
OCD	rs35646408	6	125697434	A	G	0.3531	0.0712	7.13608e-07	24.5944	0.0266737	0.0260257	0.3054
OCD	rs58466321	8	111353512	C	T	0.4489	0.0874	2.77e-07	26.3801	0.0186335	0.0297031	0.530401
OCD	rs68033110	18	57914679	A	G	-0.2696	0.0586	4.26697e-06	21.1663	0.0156091	0.0195329	0.4242
MDD	rs1021363	10	106610839	A	G	0.03	0.0045	2.61678e-11	44.4444	0.0163931	0.0170615	0.3366
MDD	rs10235664	7	2086814	T	C	0.027	0.0049	3.58418e-08	30.3623	0.0106665	0.0178756	0.5507
MDD	rs10501696	11	88748162	A	G	0.0295	0.0044	2.02034e-11	44.9509	-0.0118914	0.0163813	0.4679
MDD	rs10913112	1	175913828	T	C	-0.0262	0.0045	5.80703e-09	33.8983	-0.0287829	0.0172523	0.0952511
MDD	rs12919291	16	13800430	C	G	0.0327	0.0055	2.75691e-09	35.3484	0.0059462	0.0209699	0.776699
MDD	rs12967143	18	53099012	C	G	-0.0345	0.0047	2.12916e-13	53.8818	-0.0371438	0.0186764	0.0467197
MDD	rs13037326	20	44692598	T	C	0.031	0.0049	2.50735e-10	40.025	-0.0002074	0.0184804	0.991
MDD	rs1367635	18	50861409	T	C	-0.0253	0.0043	4.01144e-09	34.6182	-0.0058351	0.0163241	0.720701
MDD	rs150186873	6	27182377	A	C	-0.0704	0.012	4.44643e-09	34.4178	-0.0343122	0.0500736	0.4932
MDD	rs150346963	7	117628555	T	C	0.0283	0.0044	1.26087e-10	41.3683	0.0055579	0.0165803	0.7375
MDD	rs17641524	1	197704717	T	C	-0.03	0.0053	1.5104e-08	32.0399	-0.0045363	0.0207994	0.8274
MDD	rs1931388	9	11203149	A	G	0.0295	0.0044	2.02034e-11	44.9509	0.0067638	0.016448	0.680899
MDD	rs1950829	14	42097937	A	G	0.0297	0.0043	4.95091e-12	47.7063	-0.0020482	0.0162043	0.8994
MDD	rs198457	11	61471678	T	C	-0.0315	0.0056	1.85508e-08	31.6406	-0.0360135	0.0239199	0.1322
MDD	rs2111592	2	208049581	A	G	0.0263	0.0046	1.08172e-08	32.6886	0.0102298	0.0171223	0.550201
MDD	rs2214123	6	67000001	A	G	0.0261	0.0045	6.63149e-09	33.64	0.0145883	0.0169448	0.3893
MDD	rs2232423	6	28366151	A	G	0.062	0.007	8.20913e-19	78.449	0.0735655	0.0355335	0.0384202
MDD	rs2247523	7	82462834	C	G	-0.0243	0.0043	1.59366e-08	31.9356	-0.0232016	0.0164003	0.1572
MDD	rs2418449	9	119731359	T	C	0.0281	0.0048	4.79408e-09	34.2713	0.0017701	0.0177707	0.9207
MDD	rs2568958	1	72765116	A	G	0.0382	0.0044	3.89492e-18	75.374	0.0101859	0.0168045	0.5444
MDD	rs28541419	15	88945878	C	G	0.0292	0.0052	1.96125e-08	31.5325	-0.0065033	0.0196658	0.740901
MDD	rs2876520	6	142996618	C	G	-0.026	0.0043	1.48016e-09	36.5603	-0.0008785	0.0162948	0.957
MDD	rs30266	5	103972357	A	G	0.0366	0.0046	1.76943e-15	63.3062	0.0174825	0.0174899	0.3175
MDD	rs3099439	5	87545318	T	C	-0.0241	0.0043	2.08675e-08	31.4121	0.009506	0.0163317	0.5605
MDD	rs354155	1	49675276	C	G	-0.0449	0.0075	2.14185e-09	35.8402	-0.0096717	0.0257776	0.707499
MDD	rs3807865	7	12250402	A	G	0.031	0.0044	1.84857e-12	49.6384	-0.012497	0.0166739	0.4536
MDD	rs4141983	1	18122009	T	C	0.0264	0.0046	9.51639e-09	32.9376	0.0116425	0.0172554	0.4999
MDD	rs4730387	7	109100414	A	T	0.0238	0.0043	3.11435e-08	30.6349	-0.0088002	0.0163194	0.5897
MDD	rs4799949	18	35155910	T	C	-0.0292	0.0046	2.18379e-10	40.2949	-0.0205143	0.0177851	0.2487
MDD	rs4936275	11	113365084	T	C	0.0278	0.0044	2.64659e-10	39.9194	0.0352781	0.01773	0.0466198
MDD	rs508502	13	80921519	T	C	-0.0264	0.0048	3.79791e-08	30.25	-0.0084014	0.0181087	0.6427
MDD	rs59082935	7	38724868	T	C	0.0363	0.0066	3.79791e-08	30.25	0.0001257	0.0247358	0.9959
MDD	rs59283172	9	25234672	A	G	-0.039	0.007	2.52659e-08	31.0408	0.0140223	0.0248178	0.5721
MDD	rs61914045	12	52352301	A	G	0.0309	0.0054	1.0514e-08	32.7438	0.0111317	0.0204813	0.5868
MDD	rs62535714	9	37182655	A	G	0.0339	0.0058	5.07093e-09	34.162	-0.0097118	0.0195787	0.619901
MDD	rs66511648	3	117515519	T	C	-0.0297	0.0048	6.11258e-10	38.2852	-0.0048612	0.0187539	0.7955
MDD	rs6656912	1	67083671	T	C	-0.0252	0.0043	4.61572e-09	34.3451	-0.0084363	0.0163275	0.605399
MDD	rs699927	3	157932227	T	G	-0.024	0.0044	4.90983e-08	29.7521	-0.0026019	0.0163664	0.8737
MDD	rs7152906	14	75125540	T	C	-0.0258	0.0043	1.97318e-09	36	0.0160008	0.0163538	0.3279
MDD	rs7241572	18	77580712	A	G	0.0323	0.0054	2.21117e-09	35.7781	0.0270937	0.0201085	0.1779
MDD	rs72948506	2	212631483	A	G	0.0265	0.0047	1.71739e-08	31.7904	0.0070157	0.0176082	0.6903
MDD	rs754287	14	103997525	A	T	-0.0289	0.0045	1.34299e-10	41.2449	0.0412549	0.0168635	0.0144301
MDD	rs7551758	1	52274078	T	G	-0.0283	0.0043	4.66053e-11	43.3148	0.0001647	0.01633	0.992
MDD	rs76954012	3	115977242	A	T	0.0412	0.0074	2.5832e-08	30.9978	0.0292118	0.0309815	0.3457
MDD	rs7725715	5	164487555	A	G	0.029	0.0043	1.53887e-11	45.484	-0.0201626	0.016308	0.2163
MDD	rs843812	3	61255413	A	G	0.0248	0.0044	1.73678e-08	31.7686	-0.0139304	0.0164082	0.3959
MDD	rs9364755	6	165117329	A	G	-0.0283	0.0051	2.87276e-08	30.7916	-0.0065694	0.019387	0.7347
MDD	rs9529218	13	31790053	T	C	-0.034	0.0054	3.04841e-10	39.6433	0.0236988	0.0192128	0.2174
MDD	rs9536381	13	53860655	T	C	0.0255	0.0046	2.96522e-08	30.7302	-0.0009677	0.0174821	0.9559
MDD	rs9831648	3	49214303	T	G	-0.0292	0.0052	1.96125e-08	31.5325	-0.044025	0.020085	0.0283798
Bipolar disorder	rs1054442	12	49389320	C	A	0.1264	0.0214	1.196e-08	34.8872	0.0080473	0.0164395	0.624499
Bipolar disorder	rs12553324	9	23347865	G	C	0.1275	0.0209	5.86894e-09	37.2158	0.0079652	0.0166151	0.6317
Bipolar disorder	rs1487441	6	98553894	A	G	0.1083	0.0204	2.58297e-08	28.1836	-0.0204318	0.0162591	0.2089
Bipolar disorder	rs17480050	8	19381917	G	T	0.3602	0.0309	3.27567e-39	135.885	0.0267061	0.0216948	0.2183
Bipolar disorder	rs2517959	17	37866005	T	A	-0.1147	0.0236	4.53304e-09	23.6212	-0.0138435	0.0177535	0.4355
Bipolar disorder	rs4236274	7	1896413	G	A	-0.1393	0.0215	8.4879e-12	41.9783	0.0076286	0.0171338	0.6561
Bipolar disorder	rs9834970	3	36856030	C	T	0.1203	0.0207	4.83404e-10	33.7746	-0.0210929	0.0161813	0.1924
Mania	rs138367852	10	91690428	G	A	-0.0633618	0.0131215	1.38077e-06	23.3178	0.0530943	0.0593585	0.3711
Mania	rs140184786	9	4551520	C	G	0.0704079	0.0150343	2.83896e-06	21.9319	0.0602983	0.0729848	0.4087
Mania	rs2282963	7	86370992	G	T	-0.0212937	0.00438483	1.20332e-06	23.5829	0.0117441	0.0174566	0.5011
Mania	rs2804264	9	564373	C	T	0.018893	0.0040762	3.58682e-06	21.4828	-0.0174367	0.0167335	0.2974
Mania	rs34305845	5	101394058	C	T	-0.0200135	0.00411194	1.1386e-06	23.6893	-0.0020878	0.017221	0.9035
Mania	rs35090760	5	122949746	C	A	-0.0230523	0.00469449	9.13798e-07	24.113	-0.0208548	0.0201971	0.3018
Mania	rs3861153	13	82368285	A	G	0.0594463	0.011881	5.66696e-07	25.0348	0.0552326	0.043398	0.2031
Mania	rs4720768	7	8238634	A	G	-0.0214964	0.00469841	4.77804e-06	20.9329	0.0131547	0.0200258	0.5113
Mania	rs61770266	1	54015479	T	A	-0.0233707	0.00483198	1.3277e-06	23.3934	0.0111863	0.0187867	0.5516
Mania	rs73861968	4	168220221	C	T	0.036126	0.00786053	4.32922e-06	21.1221	0.0389676	0.0359542	0.2784
Mania	rs77281911	2	172039299	A	G	0.0407633	0.0085838	2.05632e-06	22.5517	0.0136179	0.0348175	0.6957
Mania	rs79985967	3	114487305	C	T	-0.0889153	0.0181808	1.01109e-06	23.9181	0.0322552	0.0818763	0.6936
Mania	rs9977011	21	19561712	T	C	0.0380448	0.00770404	7.92848e-07	24.3867	0.0241824	0.0271963	0.3739
Alzheimer's disease	rs1065712	8	11702122	C	G	0.1081	0.0185	5.46198e-09	34.1435	-0.0409522	0.0296142	0.1667
Alzheimer's disease	rs10792832	11	85867875	G	A	0.1056	0.0084	6.33432e-36	158.041	-0.0019898	0.0170808	0.9073
Alzheimer's disease	rs10933431	2	233981912	C	G	0.0852	0.0099	1.04304e-17	74.0643	-0.0112912	0.0193474	0.5595
Alzheimer's disease	rs11218343	11	121435587	C	T	-0.1654	0.0214	1.00995e-14	59.737	-0.0437285	0.044132	0.3218
Alzheimer's disease	rs112481437	19	45549135	A	G	0.2935	0.0278	4.86295e-26	111.462	-0.0208718	0.0575577	0.716901
Alzheimer's disease	rs113706587	5	179628150	A	G	0.0925	0.0133	3.37987e-12	48.3705	-0.0205011	0.0250611	0.4133
Alzheimer's disease	rs1140239	16	30026748	T	C	-0.0592	0.0086	4.61318e-12	47.3856	0.0122628	0.0164455	0.4559
Alzheimer's disease	rs11495981	7	28177301	T	C	-0.0561	0.01	2.10499e-08	31.4721	0.0248531	0.0204258	0.2237
Alzheimer's disease	rs11500477	11	47417183	A	T	0.0585	0.0084	3.27718e-12	48.5013	-0.0006964	0.0169502	0.9672
Alzheimer's disease	rs117310449	19	45393516	T	C	0.7701	0.0338	3.25837e-115	519.112	-0.08386	0.0751275	0.2643
Alzheimer's disease	rs117618017	15	63569902	T	C	0.113	0.0119	1.74582e-21	90.1702	-0.0456229	0.0259089	0.07826
Alzheimer's disease	rs12151021	19	1050874	G	A	-0.1055	0.0093	4.08884e-30	128.688	-0.0017622	0.0175465	0.92
Alzheimer's disease	rs12444183	16	81773209	G	A	0.0591	0.0084	2.20699e-12	49.5013	0.0052555	0.0173268	0.7616
Alzheimer's disease	rs12590654	14	92938855	A	G	-0.0693	0.0087	2.07683e-15	63.4495	-0.0046463	0.017142	0.786401
Alzheimer's disease	rs1532276	8	27466157	C	T	0.1003	0.0083	2.14882e-33	146.031	-0.0088171	0.0166053	0.5954
Alzheimer's disease	rs1582763	11	60021948	A	G	-0.086	0.0084	1.65386e-24	104.819	0.0030143	0.0171938	0.8608
Alzheimer's disease	rs1693551	8	101675584	C	T	0.0459	0.0081	1.78501e-08	32.1111	0.0144302	0.016225	0.3738
Alzheimer's disease	rs17125924	14	53391680	G	A	0.0881	0.0142	5.81902e-10	38.4924	0.0014161	0.0271286	0.9584
Alzheimer's disease	rs190651665	19	45456103	G	T	-0.1598	0.026	8.37105e-10	37.7752	-0.0640842	0.0546503	0.2409
Alzheimer's disease	rs199451	17	44801784	A	G	-0.0594	0.01	2.62301e-09	35.2836	0.004618	0.022602	0.8381
Alzheimer's disease	rs2070901	1	161185058	T	G	-0.0527	0.0092	1.196e-08	32.813	-0.0243245	0.0189373	0.199
Alzheimer's disease	rs2154481	21	27473875	T	C	0.05	0.0082	1.017e-09	37.1802	-0.0479896	0.0162845	0.003209
Alzheimer's disease	rs2526377	17	56410041	G	A	-0.0452	0.0082	4.10696e-08	30.3843	0.0017558	0.016366	0.9146
Alzheimer's disease	rs2830489	21	28148191	T	C	-0.0547	0.0091	1.71799e-09	36.132	-0.0251332	0.0177607	0.157
Alzheimer's disease	rs35472547	6	32577973	T	G	-0.0954	0.0113	4.26481e-17	71.2754	0.0489547	0.0245273	0.0459399
Alzheimer's disease	rs365653	19	45361646	G	A	-0.256	0.0146	1.84799e-68	307.45	0.0231729	0.0248346	0.3508
Alzheimer's disease	rs4292	17	61554341	T	C	0.0688	0.0084	3.47376e-16	67.0839	-0.014108	0.0170025	0.4067
Alzheimer's disease	rs4485362	16	81975831	G	T	-0.0463	0.0083	1.99701e-08	31.1176	0.0066047	0.016469	0.6884
Alzheimer's disease	rs4714447	6	41239822	T	C	0.0578	0.0086	1.72902e-11	45.1709	-0.0061864	0.0171928	0.719
Alzheimer's disease	rs4734295	8	96000919	G	A	0.0487	0.0081	1.97501e-09	36.1483	-0.0327375	0.0162593	0.0440697
Alzheimer's disease	rs57402520	17	5196610	A	G	0.0905	0.0126	6.58567e-13	51.5889	-0.0476109	0.0241528	0.0487001
Alzheimer's disease	rs5848	17	42430244	T	C	0.0646	0.0092	1.7559e-12	49.3048	0.0173623	0.0175771	0.3233
Alzheimer's disease	rs593742	15	59045774	G	A	-0.061	0.009	1.04208e-11	45.9383	-0.000854	0.0174368	0.9609
Alzheimer's disease	rs6014724	20	54998544	G	A	-0.1176	0.0145	4.83727e-16	65.7777	-0.0201217	0.0300808	0.503499
Alzheimer's disease	rs61679753	19	45400747	A	T	-0.5412	0.028	2.27877e-83	373.594	-0.0069386	0.0424883	0.8703
Alzheimer's disease	rs61762319	3	154801978	G	A	0.143	0.0255	2.142e-08	31.4479	-0.0246858	0.0515129	0.631801
Alzheimer's disease	rs62375397	5	86298531	T	C	0.0746	0.01	8.57828e-14	55.6516	-0.0072849	0.0198416	0.7135
Alzheimer's disease	rs6586028	10	82253984	T	C	0.0791	0.0103	1.32892e-14	58.9764	0.0031996	0.0193877	0.8689
Alzheimer's disease	rs6656401	1	207692049	G	A	-0.1253	0.0104	2.83727e-33	145.156	-0.0069906	0.0200074	0.7268
Alzheimer's disease	rs6733839	2	127892810	T	C	0.1686	0.0084	6.48037e-90	402.862	0.0216519	0.0167338	0.1957
Alzheimer's disease	rs6846529	4	11025131	T	C	-0.0673	0.0091	1.25199e-13	54.695	-0.0217187	0.0191094	0.2557
Alzheimer's disease	rs7068231	10	61784928	G	T	0.0487	0.0084	6.78907e-09	33.6124	0.0100935	0.0166183	0.543599
Alzheimer's disease	rs7384878	7	99932049	T	C	0.0775	0.0089	2.13304e-18	75.8269	0.0084686	0.0178077	0.6344
Alzheimer's disease	rs74504435	7	54949256	G	A	-0.0842	0.0141	2.04602e-09	35.6604	0.0015648	0.0260514	0.9521
Alzheimer's disease	rs74685827	11	121353077	G	T	0.1964	0.0303	8.6278e-11	42.0144	0.057357	0.0560177	0.3059
Alzheimer's disease	rs74745468	14	39887676	A	G	0.0822	0.0145	1.39601e-08	32.1372	-0.0497744	0.0326837	0.1278
Alzheimer's disease	rs755951	8	27226790	C	A	0.0618	0.0083	7.04044e-14	55.4397	-0.016421	0.0168547	0.3299
Alzheimer's disease	rs7912495	10	11718713	G	A	0.0572	0.0082	2.86616e-12	48.6591	-0.0104657	0.0162598	0.5198
Alzheimer's disease	rs9676738	19	45704771	A	G	0.1689	0.0228	1.24394e-13	54.8769	-0.007118	0.0414677	0.8637
Alzheimer's disease	rs976271	6	114682727	A	G	0.0467	0.0084	3.23497e-08	30.9083	0.0207712	0.0169809	0.2213
Parkinson's disease	rs10451230	17	16035225	T	A	-0.096	0.0175	4.42395e-08	30.0931	-0.0293625	0.0163256	0.0720892
Parkinson's disease	rs10513789	3	182760073	G	T	-0.1596	0.0219	3.18493e-13	53.1102	0.0009019	0.0202283	0.9644
Parkinson's disease	rs10847864	12	123326598	T	G	0.1274	0.0179	9.81296e-13	50.6562	-0.0044387	0.0174102	0.7988
Parkinson's disease	rs12934900	16	30923602	T	A	0.1215	0.0184	4.33112e-11	43.6031	0.0078852	0.0168994	0.640801
Parkinson's disease	rs144814361	10	121410917	T	C	0.4411	0.068	9.06567e-11	42.0781	-0.0399968	0.0764707	0.600999
Parkinson's disease	rs329647	11	133764666	C	G	-0.1133	0.0178	1.94402e-10	40.5154	0.0084402	0.0194901	0.665001
Parkinson's disease	rs34311866	4	951947	C	T	0.2272	0.0231	7.97444e-23	96.737	0.0128554	0.0205369	0.5313
Parkinson's disease	rs35265698	6	32577973	G	C	-0.2	0.0303	3.92735e-11	43.5687	0.0489547	0.0245273	0.0459399
Parkinson's disease	rs356203	4	90666041	T	C	-0.2398	0.0178	3.00677e-41	181.492	0.0002157	0.0169115	0.9898
Parkinson's disease	rs35749011	1	155206167	A	G	0.7508	0.0659	5.02227e-30	129.801	0.0618358	0.0647729	0.3398
Parkinson's disease	rs4488803	3	58218352	A	G	-0.1136	0.0199	1.07599e-08	32.5875	-0.0469998	0.0164608	0.00430002
Parkinson's disease	rs4588066	18	40672964	A	G	0.1046	0.0178	4.45297e-09	34.5321	-0.0362922	0.0170986	0.0337901
Parkinson's disease	rs4613239	2	169119609	G	C	0.1784	0.0248	6.21441e-13	51.7471	-0.0031581	0.0253458	0.9008
Parkinson's disease	rs4698412	4	15737348	A	G	0.1258	0.0168	7.04855e-14	56.0716	0.0125841	0.0164067	0.4431
Parkinson's disease	rs4774417	15	61993702	A	G	0.1052	0.0192	4.62605e-08	30.0213	0.012079	0.0176988	0.494899
Parkinson's disease	rs58879558	17	44096486	C	T	-0.2383	0.025	1.36301e-21	90.859	0.0089968	0.0223148	0.6868
Parkinson's disease	rs620490	8	16697579	G	T	-0.1174	0.019	6.45595e-10	38.1794	-0.0300796	0.0174287	0.0843704
Parkinson's disease	rs6741007	2	135537119	G	T	-0.1233	0.0175	2.08689e-12	49.6421	-0.0053308	0.0165077	0.746799
Parkinson's disease	rs75505347	12	40885549	T	C	0.3917	0.0674	6.11702e-09	33.7744	0.0721447	0.0692546	0.2975
Parkinson's disease	rs75646569	5	60345424	G	T	0.1916	0.0266	5.61824e-13	51.8833	-0.0103219	0.0256203	0.687
Parkinson's disease	rs7695720	4	77183300	C	A	-0.1255	0.0208	1.52799e-09	36.405	0.0108212	0.0204755	0.5972
Parkinson's disease	rs823106	1	205656453	C	G	-0.1492	0.0239	4.09996e-10	38.971	0.0165932	0.0234932	0.48
Parkinson's disease	rs858295	7	23245569	G	A	-0.1039	0.0176	3.83098e-09	34.8502	-0.0249954	0.0165349	0.1306
Epilepsy	rs113778751	4	41921080	T	C	0.3318	0.0722	4.37401e-06	21.1192	-0.0059977	0.0373947	0.8726
Epilepsy	rs115193209	5	141501627	G	A	0.3373	0.0628	7.82204e-08	28.8478	-0.0511908	0.0426644	0.2302
Epilepsy	rs144259799	6	62780513	T	C	-0.1471	0.0306	1.59698e-06	23.1091	-0.0650232	0.0308642	0.0351399
Epilepsy	rs187977998	4	62882064	T	C	0.7708	0.1365	1.64999e-08	31.8873	0.0652959	0.0843474	0.4389
Epilepsy	rs191615952	19	2248882	G	A	-0.2147	0.0464	3.74904e-06	21.4106	-0.052636	0.0399331	0.1875
Epilepsy	rs35212875	11	67408033	G	A	0.2632	0.0569	3.78896e-06	21.3967	0.0230219	0.0405286	0.57
Epilepsy	rs4749700	10	32378669	C	T	0.3946	0.086	4.454e-06	21.0532	-0.0231552	0.0272998	0.3963
Epilepsy	rs6878698	5	16053586	C	A	-0.3294	0.0686	1.57601e-06	23.0568	0.0390453	0.0420059	0.3526
Epilepsy	rs7926493	11	112291421	T	C	0.2446	0.049	6.06904e-07	24.9184	-0.0132666	0.0355728	0.7092
Epilepsy	rs8045528	16	924133	A	G	0.0844	0.0182	3.45303e-06	21.5051	0.0189836	0.0167566	0.2573
Epilepsy	rs8079643	17	5333380	T	C	0.0934	0.0189	7.60694e-07	24.4214	0.0002902	0.0188923	0.9877
ALS	rs10463311	5	150410835	T	C	-0.0792	0.0126	3.457e-10	39.5102	-0.0030081	0.0189054	0.8736
ALS	rs113247976	12	57975700	T	C	0.3322	0.0492	1.41906e-11	45.5899	0.0585621	0.0668688	0.3812
ALS	rs12608932	19	17752689	C	A	0.1247	0.0121	8.76799e-25	106.209	0.0301279	0.0168471	0.0737293
ALS	rs17785991	20	48438761	A	T	0.0738	0.0118	3.51301e-10	39.1155	0.0116334	0.0179057	0.515901
ALS	rs2045180	14	31078502	A	G	0.0922	0.0118	5.69639e-15	61.0517	-0.0207677	0.0173089	0.2302
ALS	rs2077492	6	31606392	A	G	0.0612	0.0111	3.34603e-08	30.3988	-0.0134249	0.0177454	0.4493
ALS	rs2453554	9	27561800	T	C	0.1723	0.0126	2.56094e-42	186.995	0.0160535	0.01975	0.4163
ALS	rs517339	5	172354731	C	T	-0.0645	0.0112	8.46408e-09	33.1653	0.014267	0.0164453	0.3856
ALS	rs631312	3	39523003	A	G	-0.0791	0.012	5.24204e-11	43.4501	0.0065508	0.018314	0.7206
ALS	rs7303577	12	64874102	C	A	-0.098	0.0174	1.75198e-08	31.7215	-0.0444201	0.0256138	0.08288
ALS	rs9275477	6	32672641	C	A	-0.1426	0.0207	5.50174e-12	47.4568	0.0662129	0.0288467	0.02171
Migraine	rs114021764	5	39286062	C	T	0.59127	0.126465	2.93426e-06	21.859	-0.0396369	0.0474847	0.4039
Migraine	rs117122444	12	95991087	T	C	0.422306	0.0913024	3.73956e-06	21.3939	-0.0237484	0.0375458	0.527
Migraine	rs12964069	18	45530748	G	A	0.282084	0.0607373	3.41189e-06	21.5698	-0.017516	0.0294616	0.552199
Migraine	rs149892573	10	32684835	A	G	0.561652	0.107275	1.64427e-07	27.4118	0.0014731	0.0385592	0.9695
Migraine	rs150926839	8	22808218	A	G	0.57542	0.124316	3.68007e-06	21.4248	0.0169871	0.0571076	0.766099
Migraine	rs17288082	6	44280667	T	C	0.479649	0.102412	2.81982e-06	21.9354	-0.0353017	0.0509836	0.4887
Migraine	rs2742663	1	3096355	C	T	0.18995	0.0379104	5.42878e-07	25.1051	-0.0019708	0.0162609	0.9035
Migraine	rs61817877	1	204343185	T	C	1.03787	0.226639	4.66369e-06	20.9709	-0.0344374	0.0937235	0.7133
Migraine	rs739813	16	57513076	T	C	0.324096	0.0675927	1.62804e-06	22.9905	0.0295464	0.0318965	0.3543
Migraine	rs74658125	2	18689436	T	C	0.738161	0.157863	2.92586e-06	21.8646	-0.0682596	0.0772638	0.377
Migraine	rs75688476	1	220507240	A	G	0.477994	0.0965205	7.33598e-07	24.5248	0.0301052	0.0373085	0.4197
Migraine	rs77876371	6	170732118	T	G	-0.244373	0.0517744	2.35896e-06	22.278	0.0365935	0.0243689	0.1332
Migraine	rs79383367	2	222762352	T	C	0.635386	0.130428	1.10737e-06	23.732	0.0411346	0.0471653	0.3831
Migraine	rs79473161	19	13839297	C	G	0.32009	0.0698311	4.56659e-06	21.011	0.002823	0.0347314	0.9352
NAFLD	rs28601761	8	126500031	G	C	-0.110033	0.0164425	2.20191e-11	44.7827
NAFLD	rs3747207	22	44324855	A	G	0.288601	0.019822	5.07341e-48	211.983
NAFLD	rs429358	19	45411941	C	T	-0.136615	0.0239288	1.13501e-08	32.5953
NAFLD	rs73001065	19	19460541	C	G	0.281009	0.0326406	7.35699e-18	74.1181

## Sheet: Supplementary Table 4
Supplementary Table 4. Detailed information of instrumental variables used in MR analyses replication stage
Trait	SNP	Chr	Pos	effect_allele	other_allele	Exposure				Outcome
						β	SE	P-value	F-statistic	β	SE	P-value
Anxiety	rs113736886	19	46314759	A	G	-0.0543047	0.0104319	1.94406e-07	27.0987	-0.316493	0.150903	0.0359642
Anxiety	rs114174563	2	62984655	A	G	0.0264163	0.00546156	1.32513e-06	23.3943	0.0889262	0.107374	0.407561
Anxiety	rs12123967	1	207205646	C	T	-0.0578796	0.0123061	2.56921e-06	22.1213	0.168899	0.201204	0.401223
Anxiety	rs12412747	10	99649531	A	G	-0.0142207	0.00310353	4.61913e-06	20.9957	0.0506931	0.0438381	0.247529
Anxiety	rs12499508	4	173509856	A	G	0.0144009	0.00286714	5.11894e-07	25.2279	-0.0751075	0.0507399	0.138808
Anxiety	rs12793245	11	28293590	C	G	0.0218026	0.00450324	1.29372e-06	23.4405	0.0109399	0.0558209	0.844623
Anxiety	rs2095926	10	84988003	T	C	0.0208063	0.00414052	5.05755e-07	25.2511	0.0421012	0.0506929	0.406248
Anxiety	rs78205487	8	26140288	A	C	-0.0142753	0.00299226	1.84289e-06	22.76	-0.00662188	0.310528	0.982987
Anxiety	rs79790224	9	4435261	G	T	0.0333643	0.00710785	2.689e-06	22.0337	-0.164757	0.12396	0.183813
Schizophrenia	rs10108725	8	4191202	T	C	0.073204	0.0133	3.31597e-08	30.2947	0.0421012	0.0740043	0.569423
Schizophrenia	rs1024582	12	2402246	G	A	-0.098904	0.0115	6.26614e-18	73.966	-0.0704585	0.0763429	0.356048
Schizophrenia	rs10791097	11	130718630	G	T	-0.0766	0.0109	2.04597e-12	49.3861	-0.0449734	0.0360243	0.211879
Schizophrenia	rs11027857	11	24403620	A	G	0.063998	0.0109	3.67096e-09	34.4731	0.0231663	0.0279871	0.407814
Schizophrenia	rs1106568	4	176861301	A	G	-0.069404	0.0125	2.84898e-08	30.8283	0.0609184	0.0427163	0.153835
Schizophrenia	rs111294930	5	152177121	G	A	-0.087699	0.0143	9.28795e-10	37.6112	-0.00541463	0.0193946	0.780104
Schizophrenia	rs11139497	9	84739941	A	T	0.0656	0.0118	2.64801e-08	30.9061	0.0266419	0.0683003	0.696484
Schizophrenia	rs11191419	10	104612335	A	T	-0.101601	0.0118	6.6896e-18	74.1365	-0.0951902	0.0556613	0.0872348
Schizophrenia	rs11210892	1	44100084	A	G	-0.067797	0.0115	3.41696e-09	34.7556	-0.0401818	0.0466046	0.388585
Schizophrenia	rs11682175	2	57987593	C	T	0.073496	0.0109	1.57906e-11	45.4647	-0.0108587	0.0268453	0.68585
Schizophrenia	rs11693094	2	185601420	T	C	-0.073603	0.011	2.1722e-11	44.7719	0.0401818	0.043142	0.351655
Schizophrenia	rs11693528	2	200736507	G	C	0.102797	0.0136	4.73478e-14	57.1325	-0.0461487	0.0295572	0.118445
Schizophrenia	rs117074560	6	96459651	T	C	-0.156595	0.0277	1.661e-08	31.9592	-0.155485	0.0904262	0.0855294
Schizophrenia	rs11740474	5	153680747	T	A	0.062695	0.0112	1.99802e-08	31.335	-0.0573114	0.0361444	0.112825
Schizophrenia	rs1191551	14	30000405	G	T	-0.071697	0.0131	4.20804e-08	29.9543	-0.0468836	0.0731262	0.521436
Schizophrenia	rs1233578	6	28712247	G	A	-0.196397	0.0164	6.16879e-33	143.411	0.0430595	0.0709791	0.544083
Schizophrenia	rs12691307	16	29939877	G	A	-0.071902	0.0113	2.031e-10	40.4879	0.0199986	0.135705	0.882841
Schizophrenia	rs12704290	7	86427626	A	G	-0.106105	0.0168	2.59102e-10	39.889	0.0889262	0.056517	0.115616
Schizophrenia	rs12826178	12	57622371	T	G	-0.168206	0.0244	5.69902e-12	47.5229	-0.0582649	0.120621	0.629067
Schizophrenia	rs12887734	14	104046834	T	G	0.088304	0.0121	3.71878e-13	53.2586	0.0305292	0.0423429	0.47091
Schizophrenia	rs12932476	16	63709630	G	C	-0.059702	0.0109	4.61902e-08	30.0002	0.0177567	0.0685252	0.795537
Schizophrenia	rs13240464	7	110898915	C	T	-0.080704	0.0116	3.11889e-12	48.4032	0.0363319	0.0521333	0.485863
Schizophrenia	rs1498232	1	30433951	C	T	-0.072004	0.0118	1.20601e-09	37.2348	-0.00498754	0.0232623	0.830231
Schizophrenia	rs1509378	2	22754466	G	A	-0.0692	0.0119	5.39002e-09	33.8157	-0.0601539	0.0438219	0.169849
Schizophrenia	rs1615350	12	123650335	T	C	-0.0851	0.0123	4.25893e-12	47.8684	0.0345914	0.0765778	0.651473
Schizophrenia	rs16867576	5	88746331	G	A	-0.095801	0.017	1.60498e-08	31.7572	-0.0434296	0.0425418	0.307317
Schizophrenia	rs1702294	1	98501984	C	T	0.118401	0.0138	1.02707e-17	73.6127	0.137081	0.0522528	0.00870539
Schizophrenia	rs17108967	14	71542168	C	T	0.065296	0.0115	1.214e-08	32.2387	0.0256677	0.0224755	0.25344
Schizophrenia	rs17194490	3	2547786	T	G	0.0966	0.0148	6.37676e-11	42.6021	-0.0640053	0.0590848	0.278684
Schizophrenia	rs2053079	19	30987423	G	A	0.071797	0.0127	1.735e-08	31.9599	0.0353671	0.0892149	0.69179
Schizophrenia	rs2103655	20	37425958	A	G	0.0766	0.0119	1.236e-10	41.4346	0.0140989	0.050714	0.781006
Schizophrenia	rs215411	4	23423603	A	T	0.0692	0.0115	1.67699e-09	36.209	-0.0230639	0.0370779	0.533916
Schizophrenia	rs2332700	14	72417326	G	C	-0.0771	0.0125	7.38006e-10	38.0442	0.00350614	0.0329717	0.915314
Schizophrenia	rs2414718	15	61863133	A	G	0.069797	0.011	1.97802e-10	40.2613	0.00370686	0.0119404	0.756221
Schizophrenia	rs2514218	11	113392994	T	C	-0.072205	0.0116	4.64398e-10	38.7453	-0.0416557	0.0583992	0.475665
Schizophrenia	rs2535627	3	52845105	C	T	-0.070403	0.0109	1.16899e-10	41.7186	-0.0647519	0.0484047	0.180988
Schizophrenia	rs2693698	14	99719219	G	A	0.061705	0.0111	2.98696e-08	30.9026	0.0321101	0.0410593	0.434191
Schizophrenia	rs28681284	15	78908565	T	C	-0.101601	0.0141	6.34746e-13	51.9228	0.0324672	0.0354862	0.360231
Schizophrenia	rs2905432	19	19484295	A	G	-0.066001	0.0114	7.51398e-09	33.519	-0.130151	0.0380291	0.000620707
Schizophrenia	rs2909457	2	162845855	A	G	-0.059697	0.0109	4.24698e-08	29.9952	0.00934352	0.0170223	0.583075
Schizophrenia	rs301797	1	8487323	A	C	0.066097	0.0116	1.20199e-08	32.4674	0.0468836	0.0564068	0.405878
Schizophrenia	rs34796896	3	180623255	A	G	-0.082198	0.0135	1.22899e-09	37.0728	0.0363319	0.0354597	0.305553
Schizophrenia	rs35225200	4	103146888	C	A	0.144795	0.0203	9.56093e-13	50.8762	-0.117208	0.0923972	0.20461
Schizophrenia	rs35324223	11	46402852	G	A	0.091995	0.0145	2.04099e-10	40.2525	0.0334348	0.0551881	0.544626
Schizophrenia	rs35998080	1	73278615	T	G	0.069004	0.0112	6.95296e-10	37.9588	-0.0215301	0.0538636	0.689366
Schizophrenia	rs36068923	8	111485761	G	A	0.083501	0.0134	4.13504e-10	38.8306	0.0657877	0.0746427	0.378119
Schizophrenia	rs3798869	6	84328660	A	G	-0.066802	0.011	1.085e-09	36.8802	0.001998	0.00720776	0.781625
Schizophrenia	rs3849046	5	137851192	T	C	0.062496	0.0109	1.036e-08	32.8739	0.00420884	0.0194308	0.828515
Schizophrenia	rs4129585	8	143312933	C	A	-0.079301	0.0109	3.61327e-13	52.9303	0.105361	0.03906	0.00698836
Schizophrenia	rs4391122	5	60598543	G	A	0.078005	0.0109	8.9043e-13	51.2144	0.0440564	0.044003	0.316724
Schizophrenia	rs4523957	17	2208899	T	G	0.069703	0.0115	1.39801e-09	36.7373	-0.122218	0.0384719	0.0014891
Schizophrenia	rs4702	15	91426560	A	G	-0.080505	0.0115	2.62422e-12	49.0061	0.016841	0.0634308	0.790623
Schizophrenia	rs4766428	12	110723245	T	C	0.069395	0.0112	6.11604e-10	38.3902	-0.0107577	0.270308	0.968254
Schizophrenia	rs55775495	2	198245965	T	C	-0.068996	0.0114	1.55801e-09	36.6301	-0.0704585	0.0621681	0.257065
Schizophrenia	rs58120505	7	2029867	C	T	-0.082197	0.0111	1.25603e-13	54.836	0.0582689	0.096614	0.546435
Schizophrenia	rs5995756	22	40000313	C	T	-0.072497	0.0109	2.91273e-11	44.2371	-0.00796817	0.0988482	0.935752
Schizophrenia	rs6439649	3	136371691	T	G	0.070999	0.0111	1.37e-10	40.9127	0.000900405	0.0073016	0.901857
Schizophrenia	rs6704768	2	233592501	A	G	-0.0766	0.0109	2.063e-12	49.3861	-0.00697561	0.073815	0.924711
Schizophrenia	rs72986630	19	11849736	T	C	0.1459	0.0266	4.12401e-08	30.0848	0.10616	0.0758194	0.161462
Schizophrenia	rs73036062	11	133828187	A	G	-0.089104	0.0135	3.68214e-11	43.5639	-0.00662188	0.0124663	0.595293
Schizophrenia	rs73191547	8	10033425	T	A	0.066899	0.0115	6.12604e-09	33.841	0.08158	0.0423582	0.0541101
Schizophrenia	rs73229090	8	27442127	A	C	-0.0995	0.0177	1.952e-08	31.6009	0.0188218	0.0392703	0.631735
Schizophrenia	rs75968099	3	36858583	T	C	0.080104	0.0114	2.311e-12	49.374	0.0544882	0.0332764	0.101538
Schizophrenia	rs760648	22	42571028	A	G	0.075803	0.0118	1.274e-10	41.2676	0.00995033	0.0563443	0.859824
Schizophrenia	rs76355118	2	149412005	G	A	0.154399	0.0278	2.77703e-08	30.846	-0.0761254	0.118705	0.52133
Schizophrenia	rs7801375	7	131567263	G	A	0.083001	0.015	2.88297e-08	30.6185	-0.0392207	0.0390938	0.315742
Schizophrenia	rs783540	15	83254708	G	A	0.059899	0.011	4.772e-08	29.652	-0.00924258	0.0222904	0.678403
Schizophrenia	rs7893279	10	18745105	G	T	-0.1124	0.0175	1.24099e-10	41.2531	-0.00531409	0.166287	0.974506
Schizophrenia	rs8055219	16	13753384	A	G	0.076998	0.0127	1.44601e-09	36.758	0.0676586	0.0427939	0.11387
Schizophrenia	rs832190	3	63842629	T	C	-0.069897	0.0113	5.73099e-10	38.2613	0.0283995	0.0448282	0.526396
Schizophrenia	rs9636107	18	53200117	G	A	0.079595	0.0108	2.1742e-13	54.3155	-0.0323166	0.0823421	0.694713
PTSD	rs1136201	17	37879588	A	G	-0.0804999	0.0171	2.50655e-06	22.1615	-0.0178399	0.130126	0.890954
PTSD	rs117405401	12	131769084	A	G	0.255897	0.0553	3.70219e-06	21.4132	0.138892	0.22628	0.539343
PTSD	rs12706983	7	131337495	T	G	-0.0895998	0.0192	3.0614e-06	21.7777	-0.0889262	0.0429686	0.0384933
PTSD	rs139591016	4	99816170	T	C	-0.2489	0.0532	2.88883e-06	21.889	0.105361	0.13102	0.421308
PTSD	rs140928208	5	15586134	A	G	0.4474	0.0929	1.46514e-06	23.1932	0.10436	0.292132	0.720916
PTSD	rs1444764	3	123929043	A	G	0.0780993	0.0164	1.9154e-06	22.6781	-0.0192848	0.0365322	0.59758
PTSD	rs149509653	11	118558425	A	G	0.0904986	0.0189	1.68211e-06	22.9277	-0.116983	0.0490789	0.0171452
PTSD	rs17041470	12	102430430	A	G	-0.2981	0.0644	3.67641e-06	21.4266	0.145835	0.177823	0.412152
PTSD	rs17108326	14	72628507	A	G	0.105998	0.0209	3.94299e-07	25.722	-0.00995033	0.0666525	0.881327
PTSD	rs2163050	2	41826738	A	G	0.0999992	0.0211	2.14461e-06	22.4609	-0.0687072	0.0738871	0.352426
PTSD	rs35334143	20	47530708	C	G	-0.0797003	0.0171	3.14923e-06	21.7234	0.0416557	0.0363856	0.252276
PTSD	rs57753395	13	99412436	A	G	0.3764	0.0705	9.34561e-08	28.505	0.371564	0.237119	0.117117
PTSD	rs62583551	9	138660237	A	G	-0.0966001	0.0199	1.20827e-06	23.564	0.0430595	0.0423337	0.309085
PTSD	rs73154700	22	31266823	A	G	0.125998	0.0272	3.61656e-06	21.458	0.00598207	0.102894	0.953639
PTSD	rs763753	6	162168506	A	G	-0.114	0.0221	2.49111e-07	26.6088	-0.0010005	0.0395942	0.97984
PTSD	rs77537694	11	132725161	A	G	0.130203	0.028	3.31742e-06	21.6236	-0.00895974	0.0594727	0.880249
PTSD	rs7807190	7	1851461	A	G	0.0834032	0.0181	4.06733e-06	21.2329	-0.0009995	0.00292784	0.732819
PTSD	rs78608260	19	53637559	A	G	-0.3214	0.0694	3.63681e-06	21.4473	0.178648	0.163623	0.27491
PTSD	rs80074987	10	28323804	T	G	0.238103	0.0507	2.64899e-06	22.0554	-0.0885034	0.205202	0.666251
OCD	rs10417062	19	47033691	A	G	-0.2088	0.0454	4.30695e-06	21.1519	-0.0237165	0.0329269	0.471353
OCD	rs114579897	5	83946735	T	G	0.7186	0.1483	1.25901e-06	23.4797	-0.232563	0.204599	0.255675
OCD	rs115217909	4	184486097	T	C	0.3994	0.0842	2.121e-06	22.5005	0.117783	0.098651	0.232503
OCD	rs12601601	17	77869436	C	G	0.2995	0.065	4.12696e-06	21.2308	0.0198026	0.12709	0.876178
OCD	rs12794942	11	111113885	T	C	-0.3002	0.0651	4.02698e-06	21.2647	0.0198026	0.0451707	0.6611
OCD	rs13070807	3	56847945	G	C	0.2141	0.0459	3.14203e-06	21.7574	0.0448928	0.0427683	0.293868
OCD	rs2550722	16	79050368	G	A	-0.6767	0.1479	4.77397e-06	20.9342	-0.271553	0.147502	0.0656205
OCD	rs35646408	6	125697434	A	G	0.3531	0.0712	7.13608e-07	24.5944	-0.113953	0.0761412	0.134498
OCD	rs58466321	8	111353512	C	T	0.4489	0.0874	2.77e-07	26.3801	0.0695261	0.0784291	0.375357
OCD	rs68033110	18	57914679	A	G	-0.2696	0.0586	4.26697e-06	21.1663	0.0657877	0.0521382	0.207023
MDD	rs1021363	10	106610839	A	G	0.03	0.0045	2.61678e-11	44.4444	-0.00672255	0.016774	0.688588
MDD	rs10235664	7	2086814	T	C	0.027	0.0049	3.58418e-08	30.3623	-0.0401818	0.0313482	0.199917
MDD	rs10501696	11	88748162	A	G	0.0295	0.0044	2.02034e-11	44.9509	0.0382587	0.0671724	0.568976
MDD	rs10913112	1	175913828	T	C	-0.0262	0.0045	5.80703e-09	33.8983	-0.0351092	0.0340094	0.301915
MDD	rs12919291	16	13800430	C	G	0.0327	0.0055	2.75691e-09	35.3484	-0.0082338	0.0591143	0.889224
MDD	rs12967143	18	53099012	C	G	-0.0345	0.0047	2.12916e-13	53.8818	-0.0506931	0.0405444	0.211186
MDD	rs13037326	20	44692598	T	C	0.031	0.0049	2.50735e-10	40.025	0.0751075	0.0386477	0.0519691
MDD	rs1367635	18	50861409	T	C	-0.0253	0.0043	4.01144e-09	34.6182	-0.061769	0.0569579	0.278158
MDD	rs150186873	6	27182377	A	C	-0.0704	0.012	4.44643e-09	34.4178	0.0620882	0.0776349	0.423858
MDD	rs17641524	1	197704717	T	C	-0.03	0.0053	1.5104e-08	32.0399	-0.016231	0.0621571	0.793993
MDD	rs1931388	9	11203149	A	G	0.0295	0.0044	2.02034e-11	44.9509	0.0633659	0.0510087	0.214142
MDD	rs1950829	14	42097937	A	G	0.0297	0.0043	4.95091e-12	47.7063	0.0148886	0.0371325	0.68845
MDD	rs198457	11	61471678	T	C	-0.0315	0.0056	1.85508e-08	31.6406	0.103459	0.0419612	0.0136791
MDD	rs2111592	2	208049581	A	G	0.0263	0.0046	1.08172e-08	32.6886	-0.0349021	0.0679665	0.607589
MDD	rs2214123	6	67000001	A	G	0.0261	0.0045	6.63149e-09	33.64	0.0198026	0.0257925	0.442625
MDD	rs2232423	6	28366151	A	G	0.062	0.007	8.20913e-19	78.449	0.0584769	0.0334567	0.0804922
MDD	rs2247523	7	82454404	C	G	-0.0243	0.0043	1.59366e-08	31.9356	-0.0372958	0.041427	0.367973
MDD	rs2418449	9	119731359	T	C	0.0281	0.0048	4.79408e-09	34.2713	-0.0667236	0.0568144	0.240229
MDD	rs2568958	1	72765116	A	G	0.0382	0.0044	3.89492e-18	75.374	0.0186733	0.0361177	0.605149
MDD	rs28541419	15	88945878	C	G	0.0292	0.0052	1.96125e-08	31.5325	0.00400802	0.31811	0.989947
MDD	rs2876520	6	142996618	C	G	-0.026	0.0043	1.48016e-09	36.5603	-0.0198026	0.0336521	0.556229
MDD	rs30266	5	103972357	A	G	0.0366	0.0046	1.76943e-15	63.3062	0.0760347	0.0433844	0.0796742
MDD	rs3099439	5	87545318	T	C	-0.0241	0.0043	2.08675e-08	31.4121	0.0923346	0.0545027	0.0902405
MDD	rs354155	1	49675276	C	G	-0.0449	0.0075	2.14185e-09	35.8402	0.0401818	0.0494548	0.416507
MDD	rs3807865	7	12250402	A	G	0.031	0.0044	1.84857e-12	49.6384	0.0535408	0.0571337	0.3487
MDD	rs4141983	1	18122009	T	C	0.0264	0.0046	9.51639e-09	32.9376	0.0796928	0.0409519	0.0516537
MDD	rs4730387	7	109100414	A	T	0.0238	0.0043	3.11435e-08	30.6349	0.125751	0.0396423	0.00151317
MDD	rs4799949	18	35155910	T	C	-0.0292	0.0046	2.18379e-10	40.2949	-0.0148886	0.0217758	0.494149
MDD	rs4936275	11	113365084	T	C	0.0278	0.0044	2.64659e-10	39.9194	0.0627268	0.0497714	0.207562
MDD	rs508502	13	80921519	T	C	-0.0264	0.0048	3.79791e-08	30.25	-0.0513986	0.0389796	0.187302
MDD	rs59082935	7	38724868	T	C	0.0363	0.0066	3.79791e-08	30.25	0.0207825	0.0551679	0.706386
MDD	rs61914045	12	52352301	A	G	0.0309	0.0054	1.0514e-08	32.7438	0.0372958	0.0402389	0.353999
MDD	rs62535714	9	37182655	A	G	0.0339	0.0058	5.07093e-09	34.162	0.0723207	0.0793158	0.36187
MDD	rs66511648	3	117515519	T	C	-0.0297	0.0048	6.11258e-10	38.2852	-0.0449734	0.0451141	0.318823
MDD	rs6656912	1	67083671	T	C	-0.0252	0.0043	4.61572e-09	34.3451	-0.0235757	0.0417624	0.5724
MDD	rs699927	3	157932227	T	G	-0.024	0.0044	4.90983e-08	29.7521	-0.0478373	0.0449013	0.286701
MDD	rs7152906	14	75125540	T	C	-0.0258	0.0043	1.97318e-09	36	0.0497421	0.0418937	0.235093
MDD	rs7241572	18	77580712	A	G	0.0323	0.0054	2.21117e-09	35.7781	0.0372958	0.0843404	0.65834
MDD	rs72948506	2	212618440	A	G	0.0265	0.0047	1.71739e-08	31.7904	0.00598207	0.0250134	0.810986
MDD	rs754287	14	103997525	A	T	-0.0289	0.0045	1.34299e-10	41.2449	0.0344014	0.0485786	0.478846
MDD	rs7551758	1	52274078	T	G	-0.0283	0.0043	4.66053e-11	43.3148	0.0324672	0.0315	0.30268
MDD	rs76954012	3	115977242	A	T	0.0412	0.0074	2.5832e-08	30.9978	0.0148886	0.0699406	0.831424
MDD	rs7725715	5	164487555	A	G	0.029	0.0043	1.53887e-11	45.484	-0.0440169	0.0297725	0.13929
MDD	rs843812	3	61255413	A	G	0.0248	0.0044	1.73678e-08	31.7686	-0.0222456	0.0307304	0.46913
MDD	rs9364755	6	165117329	A	G	-0.0283	0.0051	2.87276e-08	30.7916	0.0790432	0.0585216	0.176802
MDD	rs9529218	13	31790053	T	C	-0.034	0.0054	3.04841e-10	39.6433	-0.0120726	0.0416078	0.7717
MDD	rs9536381	13	53860655	T	C	0.0255	0.0046	2.96522e-08	30.7302	-0.0136933	0.0252757	0.587984
MDD	rs9831648	3	49214303	T	G	-0.0292	0.0052	1.96125e-08	31.5325	0.00300451	0.031209	0.923306
Bipolar disorder	rs1054442	12	49389320	C	A	0.1264	0.0214	1.196e-08	34.8872	0.0544882	0.0389519	0.161856
Bipolar disorder	rs12553324	9	23347865	G	C	0.1275	0.0209	5.86894e-09	37.2158	0.0276152	0.0377026	0.463896
Bipolar disorder	rs1487441	6	98553894	A	G	0.1083	0.0204	2.58297e-08	28.1836	-0.0414472	0.0529527	0.433791
Bipolar disorder	rs17480050	8	19381917	G	T	0.3602	0.0309	3.27567e-39	135.885	0.0334348	0.075156	0.656413
Bipolar disorder	rs4236274	7	1896413	G	A	-0.1393	0.0215	8.4879e-12	41.9783	0.0843411	0.072485	0.2446
Bipolar disorder	rs9834970	3	36856030	C	T	0.1203	0.0207	4.83404e-10	33.7746	0.0198026	0.0244173	0.41736
Mania	rs117362095	7	127876836	C	G	0.0648892	0.0141043	4.23087e-06	21.1661	-0.199305	0.172153	0.246978
Mania	rs138367852	10	91690428	G	A	-0.0633618	0.0131215	1.38077e-06	23.3178	-0.0796928	0.151747	0.599467
Mania	rs140184786	9	4551520	C	G	0.0704079	0.0150343	2.83896e-06	21.9319	-0.347998	0.226412	0.12429
Mania	rs2282963	7	86370992	G	T	-0.0212937	0.00438483	1.20332e-06	23.5829	0.0440169	0.0334798	0.188601
Mania	rs2804264	9	564373	C	T	0.018893	0.0040762	3.58682e-06	21.4828	-0.0544882	0.0350289	0.119823
Mania	rs35090760	5	122949746	C	A	-0.0230523	0.00469449	9.13798e-07	24.113	-0.0153167	0.205402	0.940557
Mania	rs3861153	13	82368285	A	G	0.0594463	0.011881	5.66696e-07	25.0348	-0.121716	0.146617	0.406449
Mania	rs4720768	7	8238634	A	G	-0.0214964	0.00469841	4.77804e-06	20.9329	-0.0236781	0.0567686	0.676606
Mania	rs73861968	4	168220221	C	T	0.036126	0.00786053	4.32922e-06	21.1221	-0.0425944	0.0608271	0.483769
Mania	rs77281911	2	172039299	A	G	0.0407633	0.0085838	2.05632e-06	22.5517	-0.0147076	0.0353731	0.677567
Mania	rs9977011	21	19561712	T	C	0.0380448	0.00770404	7.92848e-07	24.3867	0.00796817	0.0295198	0.787217
Alzheimer's disease	rs1065712	8	11702122	C	G	0.1081	0.0185	5.46198e-09	34.1435	-0.0313875	0.0853254	0.712981
Alzheimer's disease	rs10792832	11	85867875	G	A	0.1056	0.0084	6.33432e-36	158.041	-0.0119286	0.0403165	0.767327
Alzheimer's disease	rs10933431	2	233981912	C	G	0.0852	0.0099	1.04304e-17	74.0643	-0.0825012	0.044558	0.0640911
Alzheimer's disease	rs11218343	11	121435587	C	T	-0.1654	0.0214	1.00995e-14	59.737	0.150143	0.0989198	0.129059
Alzheimer's disease	rs112481437	19	45549135	A	G	0.2935	0.0278	4.86295e-26	111.462	-0.0675297	0.102748	0.51103
Alzheimer's disease	rs113706587	5	179628150	A	G	0.0925	0.0133	3.37987e-12	48.3705	0.107059	0.0641255	0.0950134
Alzheimer's disease	rs11495981	7	28177301	T	C	-0.0561	0.01	2.10499e-08	31.4721	0.001998	0.00465561	0.667807
Alzheimer's disease	rs11500477	11	47409051	A	T	0.0585	0.0084	3.27718e-12	48.5013	-0.0441609	0.0463099	0.340289
Alzheimer's disease	rs117618017	15	63569902	T	C	0.113	0.0119	1.74582e-21	90.1702	-0.0077298	0.023977	0.747162
Alzheimer's disease	rs12151021	19	1050874	G	A	-0.1055	0.0093	4.08884e-30	128.688	-0.0139029	0.151193	0.926734
Alzheimer's disease	rs12444183	16	81773209	G	A	0.0591	0.0084	2.20699e-12	49.5013	-0.00399202	0.0465036	0.931591
Alzheimer's disease	rs12590654	14	92938855	A	G	-0.0693	0.0087	2.07683e-15	63.4495	-0.10303	0.0396697	0.00939889
Alzheimer's disease	rs1385742	6	47595155	T	A	-0.0624	0.0086	4.68598e-13	52.6468	0.0416557	0.0375177	0.266873
Alzheimer's disease	rs148601586	19	45346666	G	C	0.6483	0.0366	2.72396e-70	313.754	0.138892	0.251858	0.581311
Alzheimer's disease	rs1532276	8	27466157	C	T	0.1003	0.0083	2.14882e-33	146.031	0.0187752	0.040299	0.641289
Alzheimer's disease	rs1582763	11	60021948	A	G	-0.086	0.0084	1.65386e-24	104.819	-0.0275768	0.0805594	0.732113
Alzheimer's disease	rs1693551	8	101675584	C	T	0.0459	0.0081	1.78501e-08	32.1111	0.0256677	0.0450183	0.568568
Alzheimer's disease	rs17125924	14	53391680	G	A	0.0881	0.0142	5.81902e-10	38.4924	0.101654	0.0719712	0.157826
Alzheimer's disease	rs190651665	19	45456103	G	T	-0.1598	0.026	8.37105e-10	37.7752	-0.0629398	0.0671283	0.348448
Alzheimer's disease	rs199451	17	44801784	A	G	-0.0594	0.01	2.62301e-09	35.2836	-0.0515038	0.0721432	0.475282
Alzheimer's disease	rs2070901	1	161185058	T	G	-0.0527	0.0092	1.196e-08	32.813	0.0382587	0.059461	0.519948
Alzheimer's disease	rs2154481	21	27473875	T	C	0.05	0.0082	1.017e-09	37.1802	-0.0276152	0.0442227	0.532328
Alzheimer's disease	rs2526377	17	56410041	G	A	-0.0452	0.0082	4.10696e-08	30.3843	0.0009995	0.00718248	0.889325
Alzheimer's disease	rs2830489	21	28148191	T	C	-0.0547	0.0091	1.71799e-09	36.132	-0.00370686	0.0216842	0.864265
Alzheimer's disease	rs365653	19	45361646	G	A	-0.256	0.0146	1.84799e-68	307.45	-0.0392607	0.0404912	0.332241
Alzheimer's disease	rs3822030	4	987343	T	G	0.0514	0.0083	5.03605e-10	38.3504	0.0198966	0.0385646	0.605903
Alzheimer's disease	rs4292	17	61554341	T	C	0.0688	0.0084	3.47376e-16	67.0839	-0.00895974	0.0608794	0.882996
Alzheimer's disease	rs4485362	16	81975831	G	T	-0.0463	0.0083	1.99701e-08	31.1176	0.0430595	0.0308215	0.162395
Alzheimer's disease	rs4714447	6	41239822	T	C	0.0578	0.0086	1.72902e-11	45.1709	-0.100926	0.0429542	0.0187929
Alzheimer's disease	rs4734295	8	96000919	G	A	0.0487	0.0081	1.97501e-09	36.1483	-0.0809932	0.0463925	0.0808415
Alzheimer's disease	rs5848	17	42430244	T	C	0.0646	0.0092	1.7559e-12	49.3048	0.0266419	0.0401551	0.507026
Alzheimer's disease	rs593742	15	59045774	G	A	-0.061	0.009	1.04208e-11	45.9383	0.07139	0.0639917	0.264587
Alzheimer's disease	rs6014724	20	54998544	G	A	-0.1176	0.0145	4.83727e-16	65.7777	0.0382587	0.0578158	0.508141
Alzheimer's disease	rs61679753	19	45400747	A	T	-0.5412	0.028	2.27877e-83	373.594	-0.14491	0.125698	0.248975
Alzheimer's disease	rs61762319	3	154801978	G	A	0.143	0.0255	2.142e-08	31.4479	-0.551648	0.175316	0.00165189
Alzheimer's disease	rs62375397	5	86298531	T	C	0.0746	0.01	8.57828e-14	55.6516	-0.0194887	0.0247248	0.430565
Alzheimer's disease	rs6586028	10	82253984	T	C	0.0791	0.0103	1.32892e-14	58.9764	0.084578	0.0548591	0.123139
Alzheimer's disease	rs6656401	1	207692049	G	A	-0.1253	0.0104	2.83727e-33	145.156	0.0130852	0.0605141	0.828805
Alzheimer's disease	rs6733839	2	127892810	T	C	0.1686	0.0084	6.48037e-90	402.862	-0.0139975	0.0252722	0.579668
Alzheimer's disease	rs6846529	4	11025131	T	C	-0.0673	0.0091	1.25199e-13	54.695	0.000500125	0.00216839	0.817592
Alzheimer's disease	rs7068231	10	61784928	G	T	0.0487	0.0084	6.78907e-09	33.6124	-0.0305292	0.0409517	0.455974
Alzheimer's disease	rs7384878	7	99932049	T	C	0.0775	0.0089	2.13304e-18	75.8269	0.0120726	0.0410378	0.768619
Alzheimer's disease	rs74504435	7	54949256	G	A	-0.0842	0.0141	2.04602e-09	35.6604	-0.0661398	0.0885561	0.455143
Alzheimer's disease	rs74685827	11	121353077	G	T	0.1964	0.0303	8.6278e-11	42.0144	-0.0728933	0.237281	0.758689
Alzheimer's disease	rs74745468	14	39887676	A	G	0.0822	0.0145	1.39601e-08	32.1372	0.131905	0.0767417	0.0856473
Alzheimer's disease	rs755951	8	27226790	C	A	0.0618	0.0083	7.04044e-14	55.4397	0.0168571	0.266923	0.949644
Alzheimer's disease	rs7912495	10	11718713	G	A	0.0572	0.0082	2.86616e-12	48.6591	0.0459289	0.0341501	0.178654
Alzheimer's disease	rs9676738	19	45704771	A	G	0.1689	0.0228	1.24394e-13	54.8769	-0.120249	0.15361	0.433735
Alzheimer's disease	rs976271	6	114682727	A	G	0.0467	0.0084	3.23497e-08	30.9083	-0.0293258	0.0483879	0.544477
Parkinson's disease	rs10451230	17	16035225	T	A	-0.096	0.0175	4.42395e-08	30.0931	-0.0227395	0.0806573	0.777999
Parkinson's disease	rs10513789	3	182760073	G	T	-0.1596	0.0219	3.18493e-13	53.1102	0.0237165	0.0361752	0.51208
Parkinson's disease	rs10847864	12	123326598	T	G	0.1274	0.0179	9.81296e-13	50.6562	0.0178399	0.058793	0.761557
Parkinson's disease	rs12934900	16	30923602	T	A	0.1215	0.0184	4.33112e-11	43.6031	0.0201007	0.0391547	0.607696
Parkinson's disease	rs144814361	10	121410917	T	C	0.4411	0.068	9.06567e-11	42.0781	0.135405	0.220852	0.539809
Parkinson's disease	rs329647	11	133764666	C	G	-0.1133	0.0178	1.94402e-10	40.5154	0.111043	0.0497722	0.0256791
Parkinson's disease	rs34311866	4	951947	C	T	0.2272	0.0231	7.97444e-23	96.737	0.0778865	0.0393049	0.0475241
Parkinson's disease	rs35265698	6	32561334	G	C	-0.2	0.0303	3.92735e-11	43.5687	-0.0437429	0.186664	0.814721
Parkinson's disease	rs356203	4	90666041	T	C	-0.2398	0.0178	3.00677e-41	181.492	0.023371	0.0381829	0.540485
Parkinson's disease	rs35749011	1	155135036	A	G	0.7508	0.0659	5.02227e-30	129.801	-0.0119714	0.0308697	0.698162
Parkinson's disease	rs4488803	3	58218352	A	G	-0.1136	0.0199	1.07599e-08	32.5875	-0.0303561	0.041821	0.467926
Parkinson's disease	rs4588066	18	40672964	A	G	0.1046	0.0178	4.45297e-09	34.5321	0.0430595	0.0538701	0.424104
Parkinson's disease	rs4613239	2	169119609	G	C	0.1784	0.0248	6.21441e-13	51.7471	-0.0190809	0.0973776	0.844651
Parkinson's disease	rs4698412	4	15737348	A	G	0.1258	0.0168	7.04855e-14	56.0716	-0.0760347	0.0431127	0.0777948
Parkinson's disease	rs4774417	15	61993702	A	G	0.1052	0.0192	4.62605e-08	30.0213	-0.001998	0.0168692	0.905718
Parkinson's disease	rs58879558	17	44095467	C	T	-0.2383	0.025	1.36301e-21	90.859	-0.046882	0.0885096	0.596332
Parkinson's disease	rs620490	8	16697579	G	T	-0.1174	0.019	6.45595e-10	38.1794	-0.0583709	0.0453243	0.197798
Parkinson's disease	rs6741007	2	135537119	G	T	-0.1233	0.0175	2.08689e-12	49.6421	-0.0604934	0.240215	0.801172
Parkinson's disease	rs75505347	12	40885549	T	C	0.3917	0.0674	6.11702e-09	33.7744	0.0852598	0.15118	0.57278
Parkinson's disease	rs75646569	5	60345424	G	T	0.1916	0.0266	5.61824e-13	51.8833	-0.00672255	0.14239	0.962344
Parkinson's disease	rs7695720	4	77183300	C	A	-0.1255	0.0208	1.52799e-09	36.405	0.0962189	0.0516321	0.0623853
Parkinson's disease	rs823106	1	205656453	C	G	-0.1492	0.0239	4.09996e-10	38.971	0.0249076	0.123305	0.839917
Parkinson's disease	rs858295	7	23245569	G	A	-0.1039	0.0176	3.83098e-09	34.8502	0.0459289	0.0543712	0.398262
Epilepsy	rs113778751	4	41912748	T	C	0.3318	0.0722	4.37401e-06	21.1192	-0.160756	0.0900129	0.0741123
Epilepsy	rs115193209	5	141501627	G	A	0.3373	0.0628	7.82204e-08	28.8478	-0.347432	0.174288	0.0462135
Epilepsy	rs144259799	6	62780513	T	C	-0.1471	0.0306	1.59698e-06	23.1091	0.1415	0.0749628	0.0590801
Epilepsy	rs148215904	10	89535051	A	G	0.3576	0.0774	3.857e-06	21.3458	-0.217534	0.289933	0.45308
Epilepsy	rs187977998	4	62882064	T	C	0.7708	0.1365	1.64999e-08	31.8873	-0.173758	0.205795	0.398487
Epilepsy	rs35212875	11	67408033	G	A	0.2632	0.0569	3.78896e-06	21.3967	0.115113	0.085801	0.179718
Epilepsy	rs4749700	10	32375785	C	T	0.3946	0.086	4.454e-06	21.0532	-0.0154183	0.0393837	0.695437
Epilepsy	rs6878698	5	16053586	C	A	-0.3294	0.0686	1.57601e-06	23.0568	0.113393	0.10541	0.282046
Epilepsy	rs7926493	11	112291421	T	C	0.2446	0.049	6.06904e-07	24.9184	-0.0138961	0.09009	0.877415
Epilepsy	rs79455175	9	115416397	C	T	0.6511	0.1418	4.39602e-06	21.0835	0.0363319	0.210836	0.863183
Epilepsy	rs8045528	16	924133	A	G	0.0844	0.0182	3.45303e-06	21.5051	-0.00598207	0.0185344	0.74688
Epilepsy	rs8079643	17	5333380	T	C	0.0934	0.0189	7.60694e-07	24.4214	0.00895974	0.0318097	0.778199
ALS	rs10463311	5	150410835	T	C	-0.0792	0.0126	3.457e-10	39.5102	-0.0256677	0.0353551	0.467839
ALS	rs113247976	12	57975700	T	C	0.3322	0.0492	1.41906e-11	45.5899	-0.0911289	0.175873	0.604352
ALS	rs12608932	19	17752689	C	A	0.1247	0.0121	8.76799e-25	106.209	0.00299551	0.0394435	0.939463
ALS	rs17785991	20	48438761	A	T	0.0738	0.0118	3.51301e-10	39.1155	0.0344014	0.031801	0.279354
ALS	rs2045180	14	31078502	A	G	0.0922	0.0118	5.69639e-15	61.0517	0.0825012	0.0359391	0.0216998
ALS	rs2077492	6	31606392	A	G	0.0612	0.0111	3.34603e-08	30.3988	-0.045102	0.179254	0.801343
ALS	rs2453554	9	27561800	T	C	0.1723	0.0126	2.56094e-42	186.995	-0.0604934	0.058102	0.297802
ALS	rs517339	5	172354731	C	T	-0.0645	0.0112	8.46408e-09	33.1653	-0.0116678	0.0198953	0.557566
ALS	rs631312	3	39508968	A	G	-0.0791	0.012	5.24204e-11	43.4501	0.0113643	0.820292	0.988946
ALS	rs7303577	12	64874102	C	A	-0.098	0.0174	1.75198e-08	31.7215	0.0382587	0.0302389	0.205795
ALS	rs75087725	21	45753117	A	C	0.4179	0.0627	2.65216e-11	44.4232	0.0468836	0.143638	0.74412
ALS	rs9275477	6	32672641	C	A	-0.1426	0.0207	5.50174e-12	47.4568	-0.0217345	0.359847	0.951838
Migraine	rs114021764	5	39286062	C	T	0.59127	0.126465	2.93426e-06	21.859	-0.130337	0.117321	0.266595
Migraine	rs117122444	12	95991087	T	C	0.422306	0.0913024	3.73956e-06	21.3939	0.0657877	0.126752	0.60374
Migraine	rs12964069	18	45530748	G	A	0.282084	0.0607373	3.41189e-06	21.5698	0.0806579	0.0778767	0.300336
Migraine	rs149892573	10	32684835	A	G	0.561652	0.107275	1.64427e-07	27.4118	-0.034695	0.0653469	0.595464
Migraine	rs150629880	3	68035457	A	G	0.906374	0.192492	2.49385e-06	22.1712	-0.294103	0.202519	0.14644
Migraine	rs150926839	8	22808218	A	G	0.57542	0.124316	3.68007e-06	21.4248	-0.0731085	0.220242	0.739929
Migraine	rs17288082	6	44280667	T	C	0.479649	0.102412	2.81982e-06	21.9354	0.111541	0.159691	0.484876
Migraine	rs61817877	1	204343185	T	C	1.03787	0.226639	4.66369e-06	20.9709	0.219938	0.24353	0.366459
Migraine	rs73199002	3	127163204	A	T	0.633996	0.135524	2.89536e-06	21.8847	0.0907544	0.186442	0.626421
Migraine	rs739813	16	57513076	T	C	0.324096	0.0675927	1.62804e-06	22.9905	-0.101037	0.0652401	0.121457
Migraine	rs74658125	2	18689436	T	C	0.738161	0.157863	2.92586e-06	21.8646	0.151862	0.228055	0.505473
Migraine	rs75688476	1	220507240	A	G	0.477994	0.0965205	7.33598e-07	24.5248	-0.0763412	0.0910902	0.401984
Migraine	rs77876371	6	170732118	T	G	-0.244373	0.0517744	2.35896e-06	22.278	-0.0419685	0.0412975	0.309511
Migraine	rs79383367	2	222762352	T	C	0.635386	0.130428	1.10737e-06	23.732	-0.113505	0.135994	0.403926
Migraine	rs79473161	19	13839297	C	G	0.32009	0.0698311	4.56659e-06	21.011	-0.211462	0.0783238	0.00693718
NAFLD	rs13118664	4	88239609	T	A	-0.301646	0.0531816	1.41143e-08	32.1715
NAFLD	rs17216588	19	19664077	T	C	0.477476	0.0638058	7.2448e-14	55.9993
NAFLD	rs2068834	2	27839539	C	T	0.263902	0.040652	8.48568e-11	42.1425
NAFLD	rs738409	22	44324727	G	C	0.602675	0.0407157	1.45406e-49	219.1

## Sheet: Supplementary Table 5
Supplementary Table 5. Sensitivity analyses of Neuropsychiatric disorders on NAFLD in MR analyses discovery stage
Exposure/ Outcome	Horizontal pleiotropy					Heterogeneity				MR.RAPS
	MR-Egger regression			MR-PRESSO		Methods	Cochran’s Q(Q_df)	P value	I^2	Estimated causal effect（p-value）	Estimated overdispersion variance（p-value）
	Egger intercept	SE	P value	Global test-P value	Outliers
anxiety/NAFLD	-0.01475	0.02	0.52	0.307	NA	IVW	9.649 (8)	0.291	0.1709	1.93E-01 (0.699)	3.07E-04 (0.488)
						MR Egger	9.057 (7)	0.249	0.2271
schizophrenia/NAFLD	-0.0185	0.00996	0.067	0.121	NA	IVW	88.677 (74)	0.117	0.1655	4.39E-03 (0.885)	6.34E-05 (0.342)
						MR Egger	84.657 (73)	0.165	0.1377
PTSD/NAFLD	0.0006498	0.02	0.968	0.416	NA	IVW	16.913 (16)	0.391	0.054	-2.68E-02 (0.624)	0 (NAN)
						MR Egger	16.911 (15)	0.324	0.113
OCD/NAFLD	-0.011456	0.03	0.668	0.889	NA	IVW	4.237 (9)	0.895	0	-1.07E-03 (0.967)	0 (NAN)
						MR Egger	4.039 (8)	0.854	0
MDD/NAFLD	-0.01878	0.01	0.214	0.696	NA	IVW	42.948 (49)	0.716	0	2.01E-01 (0.029)	0 (NAN)
						MR Egger	41.362 (48)	0.74	0
Bipolar disorder/NAFLD	-0.02016	0.02	0.24	0.466	NA	IVW	5.860 (6)	0.439	0	2.09E-02 (0.627)	4.89E-06 (0.977)
						MR Egger	4.082 (5)	0.538	0
mania/NAFLD	-0.0198	0.02	0.259	0.749	NA	IVW	8.591 (12)	0.737	0	1.07E-01 (0.674)	0 (NAN)
						MR Egger	7.175 (11)	0.785	0
Alzheimer's disease/NAFLD	-0.00257	0.00511	0.617	0.468	NA	IVW	49.477 (49)	0.454	0.0097	-2.93E-02 (0.336)	0 (NAN)
						MR Egger	49.218 (48)	0.424	0.0247
Parkinson's disease/NAFLD	0.01083	0.01	0.38	0.154	NA	IVW	29.557 (22)	0.13	0.2557	2.63E-02 (0.400)	1.27E-04 (0.420)
						MR Egger	28.466 (21)	0.127	0.2623
epilepsy/NAFLD	0.02367	0.02	0.176	0.358	NA	IVW	11.569（10）	0.315	0.1356	-4.90E-03 (0.906)	4.91E-05 (0.882)
						MR Egger	9.332（9）	0.407	0.0356
ALS/NAFLD	-0.01838	0.02	0.382	0.12	NA	IVW	15.953 (10)	0.101	0.3732	5.13E-02 (0.462)	1.38E-04 (0.552)
						MR Egger	14.585 (9)	0.103	0.3829
migraine/NAFLD	-0.00866	0.02	0.683	0.896	NA	IVW	7.183 (13)	0.892	0	-1.32E-02 (0.600)	0 (NAN)
						MR Egger	7.009 (12)	0.857	0

## Sheet: Supplementary Table 6
Supplementary Table 6. Sensitivity analyses of NAFLD on Neuropsychiatric disorders in MR analyses discovery stage
Exposure/ Outcome	Horizontal pleiotropy					Heterogeneity				MR.RAPS
	MR-Egger regression			MR-PRESSO		Methods	Cochran’s Q(Q_df)	P value	I^2	Estimated causal effect（p-value）	Estimated overdispersion variance（p-value）
	Egger intercept	SE	P value	Global test P value	Outliers
NAFLD/anxiety	-0.00137	0.0067	0.857	0.421	NA	IVW	4.423（3）	0.219	0.3217	2.42E-02（0.032）	5.42E-06（0.704)
						MR Egger	4.333（2）	0.115	0.5384
NAFLD/schizophrenia	0.02955	0.03	0.368	0.208	NA	IVW	7.257（3）	0.064	0.5866	-2.11E-02（0.685）	2.32E-04 (0.481)
						MR Egger	4.361（2）	0.113	0.5414
NAFLD/PTSD	-0.01075	0.02	0.69	0.729	NA	IVW	1.079 (3)	0.782	0	-5.90E-02 (0.223)	0（NAN）
						MR Egger	0.866 (2)	0.649	0
NAFLD/OCD	0.0507	0.09	0.621	0.454	NA	IVW	3.679 (3)	0.298	0.1846	-7.05E-02 (0.633)	0（NAN）
						MR Egger	3.150 (2)	0.207	0.3651
NAFLD/MDD	0.007078	0.00856	0.495	0.377	NA	IVW	4.196（3）	0.241	0.285	-1.05E-02 (0.461)	0（NAN）
						MR Egger	3.127（2）	0.209	0.3604
NAFLD/Bipolar disorder	-0.000256	0.04	0.995	0.683	NA	IVW	1.637（3）	0.651	0	-1.46E-02（0.843）	0（NAN）
						MR Egger	1.637（2）	0.441	0
NAFLD/mania	-0.00513	0.00835	0.602	0.416	NA	IVW	4.210（3）	0.24	0.2874	1.98E-03 (0.881)	0（NAN）
						MR Egger	3.542（2）	0.17	0.4353
NAFLD/Alzheimer's disease	0.0006319	0.0395	0.99	NA	NA	IVW	7.431（2）	0.024	0.7209	5.95E-03 (0.915)	3.33E-04 (0.401)
						MR Egger	7.429（1）	0.006	0.8654
NAFLD/Parkinson's disease	-0.009057	0.03	0.769	0.757	NA	IVW	1.703（3）	0.636	0	-4.37E-02（0.435）	0（NAN）
						MR Egger	1.590（2）	0.451	0
NAFLD/epilepsy	-0.0337	0.03	0.36	0.612	NA	IVW	1.879（3）	0.598	0	-6.75E-02（0.238）	0（NAN）
						MR Egger	0.491（2）	0.782	0
NAFLD/ALS	-0.00214	0.02	0.929	0.497	NA	IVW	2.752（3）	0.431	0	-6.32E-02（0.100）	0（NAN）
						MR Egger	2.739（2）	0.254	0.2698
NAFLD/migraine	-0.0472	0.08	0.607	0.401	NA	IVW	4.201 (3)	0.241	0.2859	1.50E-01 (0.288)	7.83E-04 (0.727)
						MR Egger	3.552 (2)	0.169	0.4369

## Sheet: Supplementary Table 7
Supplementary Table 7. Sensitivity analyses of Neuropsychiatric disorders on NAFLD in MR analyses replication stage
Exposure/ Outcome	Horizontal pleiotropy					Heterogeneity				MR.RAPS
	MR-Egger regression			MR-PRESSO		Methods	Cochran’s Q(Q_df)	P value	I^2	Estimated causal effect（p-value）	Estimated overdispersion variance（p-value）
	Egger intercept	SE	P value	Global test-P value	Outliers
anxiety/NAFLD	-0.09735	0.07	0.189	0.158	NA	IVW	11.812 (8)	0.16	0.3227	-2.82E-01 (0.829)	1.06E-03 (0.682)
						MR Egger	9.075 (7)	0.247	0.2287
schizophrenia/NAFLD	-0.002903	0.02	0.892	0.063	NA	IVW	89.842 (70)	0.055	0.2209	NA	NA
						MR Egger	89.818 (69)	0.047	0.2318
PTSD/NAFLD	0.009039	0.03	0.74	0.497	NA	IVW	18.872（18）	0.4	0.0462	-2.26E-02 (0.519)	0 (NAN)
						MR Egger	18.747（17）	0.343	0.0932
OCD/NAFLD	-0.00686	0.07	0.925	0.238	NA	IVW	12.290 (9)	0.197	0.2677	3.73E-02 (0.591)	0 (NAN)
						MR Egger	12.275 (8)	0.139	0.3483
MDD/NAFLD	-0.0071721	0.03	0.791	0.118	NA	IVW	59.278 (47)	0.108	0.2071	3.37E-01 (0.083)	3.45E-04 (0.345)
						MR Egger	59.186 (46)	0.092	0.2228
Bipolar disorder/NAFLD	0.005977	0.05	0.905	0.62	NA	IVW	4.192 (5)	0.522	0	1.23E-01 (0.301)	0 (NAN)
						MR Egger	4.175 (4)	0.383	0
mania/NAFLD	-0.03575	0.05	0.451	0.61	NA	IVW	7.733 (10)	0.655	0	-6.80E-01 (0.163)	1.5E-05 (0.985)
						MR Egger	7.113 (9)	0.625	0
Alzheimer's disease/NAFLD	-0.006423	0.00794	0.423	0.243	NA	IVW	58.977 (48)	0.133	0.1861	-9.28E-03 (0.737)	0 (NAN)
						MR Egger	58.166 (47)	0.127	0.192
Parkinson's disease/NAFLD	-0.004528	0.01	0.745	0.61	NA	IVW	21.513 (22)	0.489	0	-1.07E-02 (0.777)	0 (NAN)
						MR Egger	21.402 (21)	0.435	0.0188
epilepsy/NAFLD	0.004692	0.02	0.854	0.388	NA	IVW	12.975 (11)	0.295	0.1522	-1.10E-01 (0.138)	0 (NAN)
						MR Egger	12.929 (10)	0.228	0.2265
ALS/NAFLD	0.03392	0.03	0.257	0.484	NA	IVW	10.098 (11)	0.522	0	3.34E-02 (0.808)	2.45E-04 (0.711)
						MR Egger	8.651 (10)	0.566	0
migraine/NAFLD	0.02493	0.07	0.725	0.244	NA	IVW	17.512（14）	0.23	0.2005	-6.80E-02 (0.327)	2.67E-03 (0.503)
						MR Egger	17.339（13）	0.184	0.2502

## Sheet: Supplementary Table 8
Supplementary Table 8. Sensitivity analyses of NAFLD on Neuropsychiatric disorders in MR analyses replication stage
Exposure/ Outcome	Horizontal pleiotropy					Heterogeneity				MR.RAPS
	MR-Egger regression			MR-PRESSO		Methods	Cochran’s Q(Q_df)	P value	I^2	Estimated causal effect（p-value）	Estimated overdispersion variance（p-value）
	Egger intercept	SE	P value	Global test P value	Outliers
NAFLD/anxiety	0.005367	0.00526	0.415	0.725	NA	IVW	1.155 (3)	0.763	0	1.54E-02 (6.78E-04)	0 (NAN)
						MR Egger	0.113 (2)	0.944	0
NAFLD/schizophrenia	0.03803	0.03	0.292	0.236	NA	IVW	7.267 (3)	0.064	0.5872	6.77E-04 (0.979)	2.30E-04 (0.464)
						MR Egger	3.621 (2)	0.164	0.4477
NAFLD/PTSD	0.0218	0.04	0.602	0.396	NA	IVW	4.171 (3)	0.245	0.2807	-1.05E-02 (0.650)	0 (NAN)
						MR Egger	3.510 (2)	0.173	0.4302
NAFLD/OCD	-0.05598	0.11	0.656	0.365	NA	IVW	3.862（3）	0.277	0.2232	-7.72E-02 (0.280)	0 (NAN)
						MR Egger	3.404（2）	0.182	0.4125
NAFLD/MDD	0.0171	0.01	0.333	0.084	NA	IVW	10.744 (3)	0.013	0.7208	-3.05E-03 (0.805)	7.05E-05 (0.350)
						MR Egger	5.963 (2)	0.051	0.6646
NAFLD/Bipolar disorder	0.0391	0.06	0.581	0.322	NA	IVW	5.326 (3)	0.149	0.4367	-4.95E-03 (0.908)	3.97E-04 (0.648)
						MR Egger	4.389 (2)	0.111	0.5443
NAFLD/mania	0.002463	0.00728	0.767	0.564	NA	IVW	1.915 (3)	0.59	0	6.54E-03 (0.290)	0 (NAN)
						MR Egger	1.801 (2)	0.406	0
NAFLD/Alzheimer's disease	0.02136	0.02	0.467	0.22	NA	IVW	7.405 (3)	0.06	0.5949	-6.62E-03 (0.700)	8.39E-05 (0.553)
						MR Egger	5.305 (2)	0.07	0.623
NAFLD/Parkinson's disease	-0.04325	0.03	0.302	0.366	NA	IVW	3.807 (3)	0.283	0.212	-3.77E-02 (0.205)	1.10E-04 (0.796)
						MR Egger	1.909 (2)	0.385	0
NAFLD/epilepsy	0.0208	0.03	0.563	0.659	NA	IVW	1.574 (3)	0.665	0	3.48E-03 (0.892)	0 (NAN)
						MR Egger	1.103 (2)	0.576	0
NAFLD/ALS	0.01749	0.02	0.551	0.453	NA	IVW	3.677 (3)	0.298	0.1841	-1.55E-02 (0.384)	0 (NAN)
						MR Egger	2.936 (2)	0.23	0.3188
NAFLD/migraine	0.1063	0.07	0.256	0.361	NA	IVW	4.308 (3)	0.23	0.3036	8.87E-02 (0.167)	4.39E-04 (0.799)
						MR Egger	1.836 (2)	0.399	0

## Sheet: Supplementary Table 9
Supplementary Table 9. Meta-analysis in the multiplicative random-effects IVW method
Exposure/ Outcome	Stage	OR	95%CI LL	95%CI UL	P-value	Weight
anxiety/NAFLD	discovery	1.124	0.479	2.639		0.9014
	replication	0.98	0.074	12.891		0.0986
	Combined Effect	1.109	0.493	2.493	0.802	1
schizophrenia/NAFLD	discovery	1.013	0.957	1.072		0.7482
	replication	1.032	0.935	1.137		0.2518
	Combined Effect	1.018	0.969	1.069	0.482	1
PTSD/NAFLD	discovery	0.994	0.899	1.099		0.3138
	replication	0.978	0.914	1.047		0.6862
	Combined Effect	0.983	0.929	1.04	0.55	1
OCD/NAFLD	discovery	0.999	0.967	1.032		0.9528
	replication	1.034	0.893	1.196		0.0472
	Combined Effect	1.001	0.969	1.033	0.969	1
MDD/NAFLD	discovery	1.21	1.031	1.42		0.858
	replication	1.38	0.931	2.045		0.142
	Combined Effect	1.233	1.063	1.43	0.006	1
Bipolar disorder/NAFLD	discovery	1.019	0.941	1.103		0.8686
	replication	1.128	0.92	1.384		0.1314
	Combined Effect	1.033	0.959	1.112	0.394	1
mania/NAFLD	discovery	1.109	0.747	1.648		0.7989
	replication	0.523	0.238	1.152		0.2011
	Combined Effect	0.953	0.669	1.358	0.791	1
Alzheimer's disease/NAFLD	discovery	0.964	0.91	1.021		0.5085
	replication	0.99	0.934	1.05		0.4915
	Combined Effect	0.977	0.937	1.018	0.26	1
Parkinson's disease/NAFLD	discovery	1.027	0.967	1.09		0.5647
	replication	0.989	0.924	1.059		0.4353
	Combined Effect	1.01	0.966	1.057	0.656	1
epilepsy/NAFLD	discovery	1.001	0.924	1.085		0.7756
	replication	0.897	0.773	1.042		0.2244
	Combined Effect	0.977	0.91	1.048	0.513	1
ALS/NAFLD	discovery	1.031	0.895	1.189		0.7168
	replication	1.073	0.856	1.345		0.2832
	Combined Effect	1.043	0.925	1.176	0.495	1
migraine/NAFLD	discovery	0.987	0.953	1.022		0.9238
	replication	0.931	0.824	1.051		0.0762
	Combined Effect	0.983	0.95	1.016	0.306	1
NAFLD/anxiety	discovery	1.024	1.001	1.046		0.0572
	replication	1.015	1.01	1.021		0.9428
	Combined Effect	1.016	1.01	1.021	＜0.0001	1
NAFLD/schizophrenia	discovery	0.978	0.88	1.087		0.1836
	replication	0.998	0.949	1.049		0.8164
	Combined Effect	0.994	0.95	1.04	0.804	1
NAFLD/PTSD	discovery	0.943	0.892	0.996		0.4603
	replication	0.992	0.942	1.043		0.5397
	Combined Effect	0.969	0.934	1.006	0.1	1
NAFLD/OCD	discovery	0.907	0.666	1.236		0.1976
	replication	0.919	0.788	1.071		0.8024
	Combined Effect	0.917	0.799	1.052	0.214	1
NAFLD/MDD	discovery	0.987	0.956	1.018		0.3681
	replication	1.001	0.977	1.025		0.6319
	Combined Effect	0.996	0.977	1.015	0.667	1
NAFLD/Bipolar disorder	discovery	0.986	0.888	1.093		0.4132
	replication	1.002	0.919	1.094		0.5868
	Combined Effect	0.995	0.931	1.064	0.891	1
NAFLD/mania	discovery	1.001	0.972	1.031		0.0931
	replication	1.006	0.997	1.016		0.9069
	Combined Effect	1.006	0.997	1.015	0.229	1
NAFLD/Alzheimer's disease	discovery	0.978	0.881	1.086		0.1153
	replication	0.993	0.956	1.031		0.8847
	Combined Effect	0.991	0.957	1.027	0.628	1
NAFLD/Parkinson's disease	discovery	0.957	0.884	1.037		0.3353
	replication	0.961	0.908	1.017		0.6647
	Combined Effect	0.96	0.916	1.005	0.081	1
NAFLD/epilepsy	discovery	0.935	0.858	1.019		0.1413
	replication	1.003	0.969	1.039		0.8587
	Combined Effect	0.993	0.962	1.026	0.675	1
NAFLD/ALS	discovery	0.939	0.876	1.007		0.2208
	replication	0.984	0.948	1.021		0.7792
	Combined Effect	0.974	0.943	1.006	0.113	1
NAFLD/migraine	discovery	1.14	0.867	1.497		0.1858
	replication	1.101	0.966	1.254		0.8142
	Combined Effect	1.108	0.985	1.247	0.087	1

## Sheet: Supplementary Table 10
Supplementary Table 10. Meta-analysis in the fixed-effects IVW method
Exposure/ Outcome	Consortium	OR	95%CI LL	95%CI UL	P-value	Weight
anxiety/NAFLD	discovery	1.124	0.517	2.445		0.8815
	replication	0.98	0.118	8.168		0.1185
	Combined Effect	1.106	0.533	2.293	0.787	1
schizophrenia/NAFLD	discovery	1.013	0.962	1.067		0.7347
	replication	1.032	0.946	1.124		0.2653
	Combined Effect	1.018	0.974	1.064	0.431	1
PTSD/NAFLD	discovery	0.994	0.899	1.099		0.3043
	replication	0.978	0.915	1.045		0.6957
	Combined Effect	0.983	0.93	1.039	0.54	1
OCD/NAFLD	discovery	0.999	0.952	1.048		0.8713
	replication	1.034	0.912	1.171		0.1287
	Combined Effect	1.003	0.959	1.049	0.881	1
MDD/NAFLD	discovery	1.21	1.02	1.436		0.8074
	replication	1.38	0.972	1.958		0.1926
	Combined Effect	1.241	1.064	1.447	0.006	1
Bipolar disorder/NAFLD	discovery	1.019	0.941	1.104		0.8864
	replication	1.128	0.903	1.411		0.1136
	Combined Effect	1.031	0.956	1.111	0.429	1
mania/NAFLD	discovery	1.109	0.695	1.771		0.7867
	replication	0.523	0.213	1.284		0.2133
	Combined Effect	0.945	0.624	1.43	0.788	1
Alzheimer's disease/NAFLD	discovery	0.964	0.91	1.021		0.4589
	replication	0.99	0.939	1.044		0.5411
	Combined Effect	0.978	0.941	1.017	0.263	1
Parkinson's disease/NAFLD	discovery	1.027	0.975	1.081		0.6426
	replication	0.989	0.923	1.06		0.3574
	Combined Effect	1.013	0.972	1.056	0.533	1
epilepsy/NAFLD	discovery	1.001	0.929	1.079		0.772
	replication	0.897	0.782	1.03		0.228
	Combined Effect	0.976	0.914	1.043	0.474	1
ALS/NAFLD	discovery	1.031	0.922	1.154		0.8153
	replication	1.073	0.848	1.359		0.1847
	Combined Effect	1.039	0.939	1.149	0.463	1
migraine/NAFLD	discovery	0.987	0.942	1.034		0.8451
	replication	0.931	0.835	1.038		0.1549
	Combined Effect	0.978	0.937	1.021	0.311	1
NAFLD/anxiety	discovery	1.024	1.006	1.042		0.1848
	replication	1.015	1.007	1.024		0.8152
	Combined Effect	1.017	1.009	1.024	＜0.0001	1
NAFLD/schizophrenia	discovery	0.978	0.914	1.047		0.1823
	replication	0.998	0.966	1.03		0.8177
	Combined Effect	0.994	0.966	1.024	0.7	1
NAFLD/PTSD	discovery	0.943	0.86	1.034		0.1778
	replication	0.992	0.95	1.035		0.8222
	Combined Effect	0.983	0.946	1.022	0.39	1
NAFLD/OCD	discovery	0.907	0.686	1.199		0.1885
	replication	0.919	0.803	1.051		0.8115
	Combined Effect	0.917	0.812	1.035	0.16	1
NAFLD/MDD	discovery	0.987	0.96	1.013		0.1894
	replication	1.001	0.988	1.014		0.8106
	Combined Effect	0.998	0.987	1.01	0.78	1
NAFLD/Bipolar disorder	discovery	0.986	0.856	1.134		0.1774
	replication	1.002	0.939	1.07		0.8226
	Combined Effect	0.999	0.942	1.06	0.977	1
NAFLD/mania	discovery	1.001	0.976	1.026		0.173
	replication	1.006	0.995	1.018		0.827
	Combined Effect	1.005	0.995	1.016	0.334	1
NAFLD/Alzheimer's disease	discovery	0.978	0.927	1.033		0.1663
	replication	0.993	0.969	1.017		0.8337
	Combined Effect	0.99	0.969	1.013	0.396	1
NAFLD/Parkinson's disease	discovery	0.957	0.861	1.065		0.1837
	replication	0.961	0.914	1.011		0.8163
	Combined Effect	0.96	0.917	1.005	0.081	1
NAFLD/epilepsy	discovery	0.935	0.839	1.042		0.1659
	replication	1.003	0.956	1.053		0.8341
	Combined Effect	0.991	0.949	1.036	0.701	1
NAFLD/ALS	discovery	0.939	0.874	1.01		0.1768
	replication	0.984	0.952	1.018		0.8232
	Combined Effect	0.976	0.947	1.006	0.116	1
NAFLD/migraine	discovery	1.14	0.905	1.435		0.2106
	replication	1.101	0.967	1.227		0.7894
	Combined Effect	1.109	0.998	1.233	0.055	1
